# Supplementary material for: Structure and expression analysis of seven salt-related ERF genes of Populus
Source: PeerJ. 2020 Oct 20;8:e10206. doi: 10.7717/peerj.10206 (PMC7583627; doi:10.7717/peerj.10206)
Supplement: Supplemental Information 3 [file peerj-08-10206-s003.xlsx]

## Sheet: Protein
>Potri.003G139300.1;Length: 311aa MW: 34449.8 Da PI: 9.5889
MERMQENNSSFAFNTADIGSSLSQLILAGGTNTLDSIFSHCQPARSLTSPAFEPLGSSVYLRQRDLLQKFSEENRINTSLSHNLQTNPLQNPVHSSNYLAPTKKKLYRGVRQRHWGKWVAEIRLPQNRMRVWLGTYDTAEAAAYAYDRAAYKLRSQYARLNFPNLKDPAKLGFTDCSKLNALKNTVDAKIQAIFQKVKKERAKKNAAKKSNVDGKSTGSKKPVKVDSNASTPSPASSSSFSTLFSGDNWGGSELVSPAVSEDGFWKCESSSSPSVSTDCPVMVPQAMEFEDCSLARMPSYDPELIWEVLAN
>Potri.002G039100.1;Length: 227aa MW: 25319.9 Da PI: 4.7314
MEPSLFYHNQYLNSDLSPESSFGSLDSFPWDDLFQSSSLPFNTSDSGEMVLFNDLGADGAKESSESNSSSGIKEEEVTSNAKEEEPKKEKSYRGVRRRPWGKYAAEIRDSTRNGVRVWLGTFDSAEAAALAYDQAAFSMRGSMAVLNFSVEMVRESLEDMKYRCEDGCSPVVALKRRHSVRRKSTSRKSKVNQVANTRQQNVVVLEDLGADYLEELLNSCESSSSW
>Potri.005G195000.1;Length: 498aa MW: 54060.9 Da PI: 9.4664
MMQKDFSTVSMAAEKVLLQFDKKTPKKKRKEKTWLDICTLLFHSSYMCVLKVANPRGNSGEYSRYPYTDSDDNQEERSYTAQQIFSELNQPIQRHVEVTQSPHMFMGYSSSAEMSAMVSALTHVVSGHRGSTSDWGSYGASGLGGATITSTFVQAAPGSNTSPASPSLSAYSSTSGSGSWIGQKRGREKEAGAAAQLKESLPRVHRGFDDFRSSLGDSPSSGATATEEVSASTLVFSTTATPSTTATPSSETASLGETGERKRRYRGVRQRPWGKWAAEIRDPHKAARVWLGTFETAEAAARAYDEAALRFRGSRAKLNFPENARLLPAQMQNVTASQVPISRSQLPSHHQLQSISSPRQQAQRPQVPAPALFQSQPDIIRDYWEYSQLLQSSGDFHGQ…
>Potri.004G051700.1;Length: 183aa MW: 20118.5 Da PI: 10.2631
MVLTSQSHDLPLNENDSQDMVIYHMISEISAPNSSSNNTLPRSHINTSGMLQPARTAVAKKHYRGVRRRPWGKYAAEIRDSRRRGARIWLGTFETAEEAALAYDRAAFNMRGSKALLNFPAEVVAAATSAQNFQPILSSTRSSKNALDTSFSCRTISIAASQPESQSSKSGEPRHKGPDIVEN
>Potri.018G038100.1;Length: 155aa MW: 17307.5 Da PI: 8.0461
MVRERRERGDDSGRYKGVRMRKWGKWVAEIRQPNSRDRIWLGSYNTAEEAARAYDAAVLCLRGPSATFHFPTNIPEIPAMTDQVLSPMQIREVASRHARRGSTVEPAERIVGPGLCEVSSGRSGEVYLGGGENMEECLEGIFSGAYYQTPGVWTV
>Potri.006G138900.1;Length: 135aa MW: 14649.4 Da PI: 4.9281
MRKWGKWVAEIRQPNSRNRIWLGSYNTAEEAARAYDAAVLCLRGPSATFNFPSNVPEIPATTEIMPPAQIREVAFRHARRGSTLEAAERIVESGLFEGPSGMSGEVYLGGEGDGAENLEGVSSGVCYQTSGVWTV
>Potri.011G061700.1;Length: 183aa MW: 20099.5 Da PI: 9.4827
MVLSSQIHELPFNENDSQDMVIYQMINEASAPNSSTYNILPRSQINTSGMLQPARTVIAKKHYRGVRRRPWGKYAAEIRDSKRHGARIWLGTFETAEAAALAYDRAAFNMRGSKALLNFPAEVVAAISTQNCQPIFSSTRTSSKKAMDSCGSSSTITIATSQSESESSTSGESRRQGSDILEN

## Sheet: cDNA
>Potri.003G139300.1
ATGGAAAGAATGCAAGAAAACAACTCTTCTTTTGCATTCAACACAGCTGATATTGGTTCCTCACTGTCACAACTTATTTTGGCAGGAGGGACCAACACTTTGGATTCTATTTTCTCTCATTGCCAACCAGCGCGTTCTCTTACCAGTCCTGCTTTTGAGCCTTTAGGCTCTTCAGTCTATCTCCGCCAGAGAGATCTCTTGCAAAAATTCAGTGAAGAAAACAGAATAAACACCTCCTTATCTCACAATTTGCAAACAAACCCTCTTCAAAACCCTGTGCACTCCAGCAACTATTTGGCTCCAACCAAGAAGAAACTATACAGGGGAGTCAGGCAGAGGCATTGGGGCAAATGGGTTGCTGAAATTAGACTTCCTCAAAACAGAATGAGAGTCTGGTTA…
>Potri.002G039100.1
ATGGAACCCTCTTTGTTTTACCATAATCAATACCTAAATTCAGATCTCTCCCCTGAATCTTCTTTTGGTTCTTTAGATTCATTTCCATGGGATGATCTTTTTCAGAGCAGTTCCCTTCCTTTTAACACCAGTGACTCAGGGGAGATGGTACTGTTTAATGATTTAGGCGCCGATGGTGCCAAGGAGTCCTCGGAATCTAATTCCTCGAGTGGAATTAAGGAAGAGGAAGTGACTTCAAATGCCAAAGAAGAGGAGCCAAAGAAAGAGAAATCCTACAGAGGGGTTAGGAGGCGGCCATGGGGTAAATATGCTGCAGAGATAAGGGATTCTACAAGAAATGGCGTCCGGGTTTGGCTAGGAACCTTTGATAGTGCAGAGGCGGCTGCTTTGGCTTATGAT…
>Potri.005G195000.1
ATGATGCAGAAAGATTTTAGCACTGTTTCAATGGCGGCGGAAAAGGTTCTCCTACAATTTGACAAAAAAACCCCAAAAAAGAAAAGAAAAGAAAAAACTTGGCTTGATATTTGTACCCTGCTTTTTCATTCAAGTTACATGTGCGTATTGAAGGTGGCGAACCCAAGAGGCAACTCAGGGGAGTACAGCAGGTACCCTTACACAGATAGCGATGATAACCAAGAAGAGAGATCGTACACAGCACAACAAATATTTTCTGAATTGAATCAACCAATACAGCGGCATGTGGAGGTAACTCAATCACCACATATGTTCATGGGGTATAGCAGTTCAGCAGAGATGTCTGCAATGGTATCAGCACTTACACATGTGGTCTCAGGCCACAGAGGAAGTACTAGC…
>Potri.004G051700.1
ATGGTATTAACCTCCCAGAGCCATGATCTCCCTTTAAATGAGAATGACTCGCAAGACATGGTCATATACCATATGATCAGTGAGATCAGTGCCCCAAATAGCAGTTCAAATAATACGCTTCCAAGAAGCCATATCAACACTTCAGGCATGCTCCAACCAGCTAGGACAGCCGTAGCAAAGAAGCACTACAGAGGCGTGAGGCGTCGGCCATGGGGCAAATATGCTGCCGAAATTCGCGACTCCAGGCGACGCGGGGCCCGTATATGGCTAGGCACATTCGAAACGGCAGAGGAGGCTGCCTTGGCTTATGATAGGGCTGCTTTTAACATGCGCGGCTCTAAGGCCCTCCTTAATTTTCCAGCTGAAGTGGTTGCTGCAGCTACATCAGCTCAAAACTTT…
>Potri.018G038100.1
ATGGTGAGAGAAAGAAGGGAGCGAGGAGATGATAGCGGGCGTTACAAGGGAGTGAGGATGAGAAAGTGGGGAAAATGGGTAGCAGAAATAAGGCAACCTAACAGCAGGGATAGAATATGGTTAGGTTCATATAATACTGCAGAGGAAGCAGCAAGAGCATATGATGCTGCTGTTTTGTGTTTACGAGGGCCTTCGGCGACGTTTCATTTTCCAACGAATATACCGGAAATCCCTGCCATGACAGATCAGGTATTGTCTCCCATGCAGATCAGGGAGGTTGCTTCCAGGCATGCAAGAAGGGGGAGTACTGTGGAGCCCGCAGAGAGGATTGTGGGACCTGGGTTGTGTGAAGTGTCGTCTGGGAGGAGTGGAGAGGTGTACTTGGGTGGTGGAGAGAAT…
>Potri.006G138900.1
ATGAGAAAGTGGGGAAAATGGGTAGCAGAAATAAGGCAACCAAACAGTAGAAATAGAATATGGTTAGGTTCATATAATACCGCAGAGGAAGCAGCAAGAGCATATGATGCTGCTGTTTTATGTTTACGTGGGCCTTCGGCGACGTTTAATTTTCCATCGAATGTACCGGAAATTCCTGCAACGACAGAGATAATGCCTCCCGCGCAGATTAGGGAGGTTGCTTTTAGGCATGCAAGAAGGGGGAGTACTTTGGAAGCTGCAGAGAGGATTGTGGAATCTGGGTTGTTTGAAGGGCCGTCTGGGATGAGTGGAGAGGTTTATCTGGGTGGCGAAGGCGATGGGGCGGAAAATTTAGAGGGAGTTTCGAGTGGGGTATGTTATCAAACATCTGGTGTGTGG…
>Potri.011G061700.1
ATGGTATTAAGCTCCCAGATCCATGAGCTCCCCTTTAATGAGAATGACTCACAAGACATGGTCATATATCAGATGATCAACGAGGCCAGCGCCCCGAATAGCAGTACATATAATATACTTCCGAGAAGCCAAATCAACACTTCAGGCATGCTCCAACCAGCGAGGACAGTCATAGCAAAGAAGCATTACCGGGGCGTGAGGCGTCGGCCATGGGGGAAATATGCTGCAGAAATTCGTGACTCCAAAAGACACGGGGCTCGTATATGGCTAGGCACATTCGAAACGGCGGAGGCGGCTGCCCTGGCTTATGATAGGGCTGCTTTTAACATGCGTGGCTCTAAGGCCCTCCTTAATTTTCCAGCTGAAGTGGTGGCTGCTATATCAACTCAAAACTGTCAG…
