# Supplementary material for: Structure and expression analysis of seven salt-related ERF genes of Populus
Source: PeerJ. 2020 Oct 20;8:e10206. doi: 10.7717/peerj.10206 (PMC7583627; doi:10.7717/peerj.10206)
Supplement: Supplemental Information 4 [file peerj-08-10206-s004.xlsx]

## Sheet: Table S4
############### Parameters ###############
# MATCH_SCORE: 50
# MATCH_SIZE: 5
# GAP_PENALTY: -1
# OVERLAP_WINDOW: 5
# E_VALUE: 1e-05
# MAX GAPS: 25
############### Statistics ###############
# Number of collinear genes: 21519, Percentage: 29.47
# Number of all genes: 73013
##########################################
## Alignment 0: score=301.0 e_value=1.7e-10 N=7 Chr01&Chr01 plus
0- 0:	Potri.001G425400.1	Potri.001G433300.1	0
0- 1:	Potri.001G425800.1	Potri.001G433800.1	1e-100
0- 2:	Potri.001G426200.1	Potri.001G434000.1	0
0- 3:	Potri.001G426900.1	Potri.001G434100.1	5e-105
0- 4:	Potri.001G427600.1	Potri.001G434700.1	0
0- 5:	Potri.001G428100.1	Potri.001G435000.1	0
0- 6:	Potri.001G429200.1	Potri.001G435300.1	3e-143
## Alignment 1: score=273.0 e_value=2.5e-09 N=6 Chr01&Chr01 plus
1- 0:	Potri.001G425300.1	Potri.001G433900.1	2e-140
1- 1:	Potri.001G425400.1	Potri.001G434100.1	0
1- 2:	Potri.001G426100.1	Potri.001G434400.1	3e-51
1- 3:	Potri.001G426200.1	Potri.001G434500.1	2e-30
1- 4:	Potri.001G426900.1	Potri.001G434700.1	0
1- 5:	Potri.001G427400.1	Potri.001G435300.1	7e-70
## Alignment 2: score=273.0 e_value=3.4e-09 N=6 Chr01&Chr01 plus
2- 0:	Potri.001G426000.1	Potri.001G427800.1	3e-17
2- 1:	Potri.001G426200.1	Potri.001G428400.1	2e-45
2- 2:	Potri.001G426600.1	Potri.001G429100.1	0
2- 3:	Potri.001G427500.1	Potri.001G429500.1	6e-96
2- 4:	Potri.001G427600.1	Potri.001G429700.1	0
2- 5:	Potri.001G427700.1	Potri.001G429800.1	0
## Alignment 3: score=498.0 e_value=3.9e-27 N=12 Chr01&Chr01 minus
3- 0:	Potri.001G057900.1	Potri.001G329000.1	2e-36
3- 1:	Potri.001G058000.1	Potri.001G328700.1	4e-25
3- 2:	Potri.001G058800.1	Potri.001G328000.1	5e-72
3- 3:	Potri.001G059100.1	Potri.001G327500.1	9e-68
3- 4:	Potri.001G060000.1	Potri.001G327100.1	1e-107
3- 5:	Potri.001G060500.1	Potri.001G326200.1	8e-66
3- 6:	Potri.001G060600.1	Potri.001G325800.1	1e-73
3- 7:	Potri.001G060700.1	Potri.001G325600.1	0
3- 8:	Potri.001G061100.1	Potri.001G325200.1	0
3- 9:	Potri.001G061200.1	Potri.001G325100.1	1e-58
3- 10:	Potri.001G061500.1	Potri.001G324800.1	0
3- 11:	Potri.001G061800.1	Potri.001G323500.1	3e-85
## Alignment 4: score=273.0 e_value=7e-12 N=7 Chr01&Chr01 minus
4- 0:	Potri.001G015700.1	Potri.001G271400.1	0
4- 1:	Potri.001G017300.1	Potri.001G270000.1	4e-11
4- 2:	Potri.001G017500.1	Potri.001G269800.1	6e-173
4- 3:	Potri.001G018600.1	Potri.001G269300.1	8e-30
4- 4:	Potri.001G018900.1	Potri.001G267900.1	9e-133
4- 5:	Potri.001G019400.1	Potri.001G267800.1	0
4- 6:	Potri.001G019600.1	Potri.001G267700.1	3e-79
## Alignment 5: score=405.0 e_value=1.8e-20 N=10 Chr01&Chr02 plus
5- 0:	Potri.001G292100.1	Potri.002G117600.1	2e-25
5- 1:	Potri.001G292900.1	Potri.002G118000.1	3e-102
5- 2:	Potri.001G294300.1	Potri.002G119200.1	2e-66
5- 3:	Potri.001G295500.1	Potri.002G119300.1	4e-66
5- 4:	Potri.001G295700.1	Potri.002G119400.1	3e-61
5- 5:	Potri.001G295800.1	Potri.002G119500.1	5e-123
5- 6:	Potri.001G295900.1	Potri.002G119600.1	2e-36
5- 7:	Potri.001G296600.1	Potri.002G120100.1	2e-45
5- 8:	Potri.001G298000.1	Potri.002G120900.1	3e-75
5- 9:	Potri.001G298700.1	Potri.002G121600.1	5e-25
## Alignment 6: score=281.0 e_value=1e-10 N=7 Chr01&Chr02 plus
6- 0:	Potri.001G300200.1	Potri.002G122600.1	3e-71
6- 1:	Potri.001G300900.1	Potri.002G122700.1	0
6- 2:	Potri.001G301800.1	Potri.002G123000.1	4e-120
6- 3:	Potri.001G301900.1	Potri.002G123200.1	2e-71
6- 4:	Potri.001G303000.1	Potri.002G123700.1	6e-171
6- 5:	Potri.001G304000.1	Potri.002G124200.1	0
6- 6:	Potri.001G304900.1	Potri.002G124300.1	1e-149
## Alignment 7: score=1408.0 e_value=3.2e-111 N=34 Chr01&Chr02 minus
7- 0:	Potri.001G085900.1	Potri.002G174600.1	0
7- 1:	Potri.001G086300.1	Potri.002G174400.1	2e-91
7- 2:	Potri.001G086400.1	Potri.002G174300.1	1e-101
7- 3:	Potri.001G086600.1	Potri.002G174100.1	0
7- 4:	Potri.001G086700.1	Potri.002G173900.1	2e-88
7- 5:	Potri.001G087200.1	Potri.002G173700.1	8e-15
7- 6:	Potri.001G087800.1	Potri.002G173400.1	0
7- 7:	Potri.001G088600.1	Potri.002G172500.1	1e-37
7- 8:	Potri.001G089400.1	Potri.002G171900.1	3e-35
7- 9:	Potri.001G090300.1	Potri.002G171400.1	6e-16
7- 10:	Potri.001G090600.1	Potri.002G171200.1	0
7- 11:	Potri.001G091700.1	Potri.002G170300.1	3e-70
7- 12:	Potri.001G092500.1	Potri.002G169400.1	2e-107
7- 13:	Potri.001G092900.1	Potri.002G168700.1	1e-93
7- 14:	Potri.001G093800.1	Potri.002G168400.1	0
7- 15:	Potri.001G094000.1	Potri.002G168300.1	5e-11
7- 16:	Potri.001G094100.1	Potri.002G168100.1	0
7- 17:	Potri.001G094800.1	Potri.002G167400.1	1e-46
7- 18:	Potri.001G095300.1	Potri.002G167200.1	2e-167
7- 19:	Potri.001G096000.1	Potri.002G166900.1	4e-62
7- 20:	Potri.001G096100.1	Potri.002G166700.1	0
7- 21:	Potri.001G096200.1	Potri.002G166600.1	0
7- 22:	Potri.001G097700.1	Potri.002G165400.1	2e-114
7- 23:	Potri.001G098100.1	Potri.002G165100.1	5e-67
7- 24:	Potri.001G099000.1	Potri.002G164400.1	6e-41
7- 25:	Potri.001G099400.1	Potri.002G163700.1	0
7- 26:	Potri.001G099500.1	Potri.002G163400.1	6e-39
7- 27:	Potri.001G099900.1	Potri.002G162500.1	1e-105
7- 28:	Potri.001G100000.1	Potri.002G162400.1	0
7- 29:	Potri.001G101000.1	Potri.002G161900.1	5e-55
7- 30:	Potri.001G101100.1	Potri.002G161800.1	2e-76
7- 31:	Potri.001G101700.1	Potri.002G161500.1	4e-68
7- 32:	Potri.001G101800.1	Potri.002G161100.1	6e-111
7- 33:	Potri.001G101900.1	Potri.002G161000.1	4e-122
## Alignment 8: score=578.0 e_value=6.6e-34 N=14 Chr01&Chr02 minus
8- 0:	Potri.001G110900.1	Potri.002G152700.1	5e-47
8- 1:	Potri.001G111800.1	Potri.002G152200.1	1e-82
8- 2:	Potri.001G112100.1	Potri.002G152100.1	0
8- 3:	Potri.001G112400.1	Potri.002G151700.1	5e-84
8- 4:	Potri.001G113200.1	Potri.002G151100.1	1e-81
8- 5:	Potri.001G113900.1	Potri.002G150100.1	0
8- 6:	Potri.001G114900.1	Potri.002G149600.1	2e-11
8- 7:	Potri.001G115100.1	Potri.002G149400.1	0
8- 8:	Potri.001G115200.1	Potri.002G149300.1	1e-119
8- 9:	Potri.001G115800.1	Potri.002G148600.1	8e-124
8- 10:	Potri.001G116100.1	Potri.002G148500.1	6e-29
8- 11:	Potri.001G117100.1	Potri.002G147300.1	3e-144
8- 12:	Potri.001G117600.1	Potri.002G147100.1	3e-96
8- 13:	Potri.001G117800.1	Potri.002G147000.1	0
## Alignment 9: score=357.0 e_value=2.7e-17 N=9 Chr01&Chr02 minus
9- 0:	Potri.001G103100.1	Potri.002G160500.1	0
9- 1:	Potri.001G103400.1	Potri.002G160000.1	5e-66
9- 2:	Potri.001G103600.1	Potri.002G159400.1	1e-180
9- 3:	Potri.001G104700.1	Potri.002G158400.1	0
9- 4:	Potri.001G104900.1	Potri.002G158200.1	2e-102
9- 5:	Potri.001G105400.1	Potri.002G158000.1	0
9- 6:	Potri.001G106500.1	Potri.002G157900.1	7e-24
9- 7:	Potri.001G107000.1	Potri.002G157700.1	4e-48
9- 8:	Potri.001G107100.1	Potri.002G157300.1	6e-90
## Alignment 10: score=342.0 e_value=1.1e-14 N=8 Chr01&Chr02 minus
10- 0:	Potri.001G152800.1	Potri.002G138400.1	6e-101
10- 1:	Potri.001G153000.1	Potri.002G138300.1	5e-88
10- 2:	Potri.001G153100.1	Potri.002G137900.1	1e-104
10- 3:	Potri.001G153900.1	Potri.002G137400.1	1e-54
10- 4:	Potri.001G154600.1	Potri.002G137200.1	1e-158
10- 5:	Potri.001G154700.1	Potri.002G136700.1	1e-129
10- 6:	Potri.001G155000.1	Potri.002G136600.1	1e-26
10- 7:	Potri.001G155100.1	Potri.002G136400.1	2e-109
## Alignment 11: score=263.0 e_value=1.2e-09 N=6 Chr01&Chr02 minus
11- 0:	Potri.001G148700.1	Potri.002G140300.1	6e-31
11- 1:	Potri.001G149300.1	Potri.002G140100.1	3e-62
11- 2:	Potri.001G149400.1	Potri.002G140000.1	0
11- 3:	Potri.001G149600.1	Potri.002G139900.1	3e-153
11- 4:	Potri.001G150300.1	Potri.002G139600.1	7e-151
11- 5:	Potri.001G150600.1	Potri.002G139500.1	2e-33
## Alignment 12: score=258.0 e_value=2.4e-09 N=6 Chr01&Chr02 minus
12- 0:	Potri.001G311000.1	Potri.002G099500.1	4e-177
12- 1:	Potri.001G311700.1	Potri.002G098600.1	1e-124
12- 2:	Potri.001G312500.1	Potri.002G098400.1	2e-93
12- 3:	Potri.001G312600.1	Potri.002G098300.1	0
12- 4:	Potri.001G312900.1	Potri.002G097700.1	2e-69
12- 5:	Potri.001G313100.1	Potri.002G097400.1	4e-144
## Alignment 13: score=578.0 e_value=7e-33 N=13 Chr01&Chr03 plus
13- 0:	Potri.001G196300.1	Potri.003G039800.1	3e-39
13- 1:	Potri.001G196500.1	Potri.003G040900.1	0
13- 2:	Potri.001G196800.1	Potri.003G041000.1	0
13- 3:	Potri.001G197100.1	Potri.003G042700.1	3e-116
13- 4:	Potri.001G197200.1	Potri.003G043200.1	4e-126
13- 5:	Potri.001G197500.1	Potri.003G043300.1	0
13- 6:	Potri.001G197600.1	Potri.003G043500.1	0
13- 7:	Potri.001G197700.1	Potri.003G043600.1	2e-67
13- 8:	Potri.001G197900.1	Potri.003G043700.1	0
13- 9:	Potri.001G198000.1	Potri.003G043900.1	0
13- 10:	Potri.001G198100.1	Potri.003G044100.1	2e-110
13- 11:	Potri.001G198400.1	Potri.003G044200.1	8e-54
13- 12:	Potri.001G198700.1	Potri.003G044400.1	3e-59
## Alignment 14: score=467.0 e_value=9.7e-26 N=12 Chr01&Chr03 plus
14- 0:	Potri.001G322200.1	Potri.003G164200.1	4e-22
14- 1:	Potri.001G323300.1	Potri.003G165400.1	8e-119
14- 2:	Potri.001G323500.1	Potri.003G166000.1	1e-83
14- 3:	Potri.001G324800.1	Potri.003G166300.1	0
14- 4:	Potri.001G325100.1	Potri.003G166500.1	6e-65
14- 5:	Potri.001G325800.1	Potri.003G167000.1	5e-72
14- 6:	Potri.001G326200.1	Potri.003G167100.1	3e-56
14- 7:	Potri.001G327100.1	Potri.003G167900.1	8e-98
14- 8:	Potri.001G327500.1	Potri.003G168700.1	5e-70
14- 9:	Potri.001G328000.1	Potri.003G169100.1	8e-73
14- 10:	Potri.001G328600.1	Potri.003G170200.1	4e-14
14- 11:	Potri.001G328700.1	Potri.003G170400.1	2e-31
## Alignment 15: score=386.0 e_value=4.1e-18 N=9 Chr01&Chr03 plus
15- 0:	Potri.001G200500.1	Potri.003G030000.1	0
15- 1:	Potri.001G201100.1	Potri.003G030600.1	3e-107
15- 2:	Potri.001G201600.1	Potri.003G031200.1	0
15- 3:	Potri.001G201800.1	Potri.003G031700.1	0
15- 4:	Potri.001G202200.1	Potri.003G031800.1	2e-25
15- 5:	Potri.001G202400.1	Potri.003G031900.1	3e-107
15- 6:	Potri.001G203100.1	Potri.003G032100.1	8e-175
15- 7:	Potri.001G204100.1	Potri.003G032200.1	9e-162
15- 8:	Potri.001G204200.1	Potri.003G032300.1	0
## Alignment 16: score=378.0 e_value=3.6e-15 N=8 Chr01&Chr03 plus
16- 0:	Potri.001G175700.1	Potri.003G057300.1	0
16- 1:	Potri.001G176600.1	Potri.003G057400.1	0
16- 2:	Potri.001G176800.1	Potri.003G057700.1	6e-63
16- 3:	Potri.001G176900.1	Potri.003G057800.1	0
16- 4:	Potri.001G177000.1	Potri.003G058000.1	2e-85
16- 5:	Potri.001G177100.1	Potri.003G058200.1	0
16- 6:	Potri.001G177200.1	Potri.003G058300.1	9e-38
16- 7:	Potri.001G177300.1	Potri.003G058500.1	0
## Alignment 17: score=376.0 e_value=6.7e-14 N=8 Chr01&Chr03 plus
17- 0:	Potri.001G385200.1	Potri.003G025700.1	2e-118
17- 1:	Potri.001G385300.1	Potri.003G025800.1	0
17- 2:	Potri.001G385500.1	Potri.003G026100.1	4e-179
17- 3:	Potri.001G385800.1	Potri.003G026200.1	7e-34
17- 4:	Potri.001G386700.1	Potri.003G026500.1	0
17- 5:	Potri.001G386900.1	Potri.003G026600.1	0
17- 6:	Potri.001G387000.1	Potri.003G026700.1	1e-45
17- 7:	Potri.001G387100.1	Potri.003G026800.1	0
## Alignment 18: score=275.0 e_value=7.3e-11 N=6 Chr01&Chr03 plus
18- 0:	Potri.001G191900.1	Potri.003G032400.1	6e-103
18- 1:	Potri.001G192000.1	Potri.003G032500.1	2e-124
18- 2:	Potri.001G192200.1	Potri.003G032600.1	0
18- 3:	Potri.001G192300.1	Potri.003G032700.1	4e-23
18- 4:	Potri.001G193000.1	Potri.003G032800.1	0
18- 5:	Potri.001G193400.1	Potri.003G033300.1	0
## Alignment 19: score=271.0 e_value=5e-11 N=6 Chr01&Chr03 plus
19- 0:	Potri.001G166500.1	Potri.003G064800.1	7e-114
19- 1:	Potri.001G167200.1	Potri.003G066900.1	0
19- 2:	Potri.001G167300.1	Potri.003G067000.1	0
19- 3:	Potri.001G167400.1	Potri.003G067100.1	2e-79
19- 4:	Potri.001G167600.1	Potri.003G067200.1	1e-53
19- 5:	Potri.001G167700.1	Potri.003G067600.1	0
## Alignment 20: score=263.0 e_value=1.6e-08 N=6 Chr01&Chr03 plus
20- 0:	Potri.001G227500.1	Potri.003G211100.1	2e-26
20- 1:	Potri.001G227900.1	Potri.003G211500.1	9e-11
20- 2:	Potri.001G228200.1	Potri.003G212000.1	0
20- 3:	Potri.001G229000.1	Potri.003G212300.1	8e-161
20- 4:	Potri.001G229300.1	Potri.003G212500.1	1e-39
20- 5:	Potri.001G230000.1	Potri.003G214200.1	0
## Alignment 21: score=31858.0 e_value=0 N=680 Chr01&Chr03 minus
21- 0:	Potri.001G065600.1	Potri.003G164300.1	0
21- 1:	Potri.001G065700.1	Potri.003G164200.1	9e-46
21- 2:	Potri.001G065800.1	Potri.003G164100.1	0
21- 3:	Potri.001G065900.1	Potri.003G164000.1	0
21- 4:	Potri.001G066000.1	Potri.003G163800.1	4e-174
21- 5:	Potri.001G066100.1	Potri.003G163700.1	1e-100
21- 6:	Potri.001G066200.1	Potri.003G163600.1	0
21- 7:	Potri.001G066400.1	Potri.003G163400.1	1e-57
21- 8:	Potri.001G066700.1	Potri.003G163300.1	0
21- 9:	Potri.001G066800.1	Potri.003G163200.1	0
21- 10:	Potri.001G066900.1	Potri.003G163000.1	0
21- 11:	Potri.001G067000.1	Potri.003G162900.1	5e-65
21- 12:	Potri.001G067300.1	Potri.003G162700.1	0
21- 13:	Potri.001G067400.1	Potri.003G162600.1	0
21- 14:	Potri.001G067600.1	Potri.003G162500.1	7e-118
21- 15:	Potri.001G067700.1	Potri.003G162400.1	0
21- 16:	Potri.001G067800.1	Potri.003G162300.1	0
21- 17:	Potri.001G067900.1	Potri.003G162200.1	0
21- 18:	Potri.001G068000.1	Potri.003G162100.1	9e-159
21- 19:	Potri.001G068100.1	Potri.003G162000.1	0
21- 20:	Potri.001G068200.1	Potri.003G161900.1	0
21- 21:	Potri.001G068400.1	Potri.003G161700.1	0
21- 22:	Potri.001G068700.1	Potri.003G161600.1	2e-146
21- 23:	Potri.001G068800.1	Potri.003G161500.1	1e-14
21- 24:	Potri.001G068900.1	Potri.003G161400.1	0
21- 25:	Potri.001G069000.1	Potri.003G161300.1	0
21- 26:	Potri.001G069100.1	Potri.003G161200.1	1e-60
21- 27:	Potri.001G069200.1	Potri.003G161100.1	4e-113
21- 28:	Potri.001G069300.1	Potri.003G161000.1	6e-168
21- 29:	Potri.001G069500.1	Potri.003G160800.1	1e-95
21- 30:	Potri.001G070100.1	Potri.003G160600.1	0
21- 31:	Potri.001G070300.1	Potri.003G160500.1	2e-124
21- 32:	Potri.001G070400.1	Potri.003G160400.1	0
21- 33:	Potri.001G070700.1	Potri.003G160000.1	2e-164
21- 34:	Potri.001G070800.1	Potri.003G159900.1	4e-88
21- 35:	Potri.001G070900.1	Potri.003G159800.1	0
21- 36:	Potri.001G071000.1	Potri.003G159700.1	0
21- 37:	Potri.001G071100.1	Potri.003G159500.1	3e-116
21- 38:	Potri.001G071200.1	Potri.003G159300.1	0
21- 39:	Potri.001G071500.1	Potri.003G159200.1	0
21- 40:	Potri.001G071900.1	Potri.003G159100.1	2e-65
21- 41:	Potri.001G072000.1	Potri.003G159000.1	0
21- 42:	Potri.001G072100.1	Potri.003G158800.1	0
21- 43:	Potri.001G072200.1	Potri.003G158700.1	9e-82
21- 44:	Potri.001G072300.1	Potri.003G158500.1	2e-114
21- 45:	Potri.001G072400.1	Potri.003G158400.1	0
21- 46:	Potri.001G072500.1	Potri.003G158300.1	7e-33
21- 47:	Potri.001G072600.1	Potri.003G158200.1	2e-134
21- 48:	Potri.001G072800.1	Potri.003G158100.1	0
21- 49:	Potri.001G072900.1	Potri.003G158000.1	1e-40
21- 50:	Potri.001G073100.1	Potri.003G157900.1	0
21- 51:	Potri.001G073200.1	Potri.003G157800.1	4e-105
21- 52:	Potri.001G073300.1	Potri.003G157700.1	0
21- 53:	Potri.001G073400.1	Potri.003G157500.1	0
21- 54:	Potri.001G073500.1	Potri.003G157400.1	1e-84
21- 55:	Potri.001G073600.1	Potri.003G157300.1	0
21- 56:	Potri.001G073700.1	Potri.003G157200.1	1e-104
21- 57:	Potri.001G073900.1	Potri.003G157100.1	3e-93
21- 58:	Potri.001G074000.1	Potri.003G157000.1	0
21- 59:	Potri.001G074100.1	Potri.003G156900.1	0
21- 60:	Potri.001G074200.1	Potri.003G156800.1	4e-16
21- 61:	Potri.001G074300.1	Potri.003G156700.1	0
21- 62:	Potri.001G074600.1	Potri.003G156600.1	0
21- 63:	Potri.001G074700.1	Potri.003G156500.1	0
21- 64:	Potri.001G074800.1	Potri.003G156400.1	0
21- 65:	Potri.001G074900.1	Potri.003G156300.1	4e-59
21- 66:	Potri.001G075000.1	Potri.003G156200.1	0
21- 67:	Potri.001G075100.1	Potri.003G156100.1	1e-89
21- 68:	Potri.001G075200.1	Potri.003G156000.1	6e-38
21- 69:	Potri.001G075300.1	Potri.003G155900.1	2e-64
21- 70:	Potri.001G075400.1	Potri.003G155700.1	0
21- 71:	Potri.001G075500.1	Potri.003G155500.1	1e-41
21- 72:	Potri.001G075600.1	Potri.003G155200.1	0
21- 73:	Potri.001G075900.1	Potri.003G154800.1	0
21- 74:	Potri.001G076100.1	Potri.003G154600.1	0
21- 75:	Potri.001G076500.1	Potri.003G154400.1	5e-42
21- 76:	Potri.001G076600.1	Potri.003G153800.1	1e-57
21- 77:	Potri.001G076800.1	Potri.003G153400.1	1e-26
21- 78:	Potri.001G077300.1	Potri.003G152500.1	2e-32
21- 79:	Potri.001G077400.1	Potri.003G152200.1	2e-27
21- 80:	Potri.001G078100.1	Potri.003G152000.1	3e-38
21- 81:	Potri.001G078700.1	Potri.003G151800.1	0
21- 82:	Potri.001G078900.1	Potri.003G151700.1	0
21- 83:	Potri.001G079100.1	Potri.003G151400.1	0
21- 84:	Potri.001G079400.1	Potri.003G151300.1	0
21- 85:	Potri.001G079500.1	Potri.003G151100.1	2e-162
21- 86:	Potri.001G079600.1	Potri.003G150800.1	1e-45
21- 87:	Potri.001G079900.1	Potri.003G150700.1	6e-126
21- 88:	Potri.001G080000.1	Potri.003G150600.1	5e-68
21- 89:	Potri.001G080200.1	Potri.003G150400.1	0
21- 90:	Potri.001G080700.1	Potri.003G150300.1	6e-102
21- 91:	Potri.001G080900.1	Potri.003G149700.1	3e-156
21- 92:	Potri.001G081000.1	Potri.003G149600.1	4e-69
21- 93:	Potri.001G081100.1	Potri.003G149300.1	0
21- 94:	Potri.001G081200.1	Potri.003G149200.1	3e-171
21- 95:	Potri.001G081300.1	Potri.003G149100.1	1e-63
21- 96:	Potri.001G081400.1	Potri.003G149000.1	2e-113
21- 97:	Potri.001G081500.1	Potri.003G148900.1	6e-132
21- 98:	Potri.001G081600.1	Potri.003G148800.1	0
21- 99:	Potri.001G081900.1	Potri.003G148700.1	0
21-100:	Potri.001G082100.1	Potri.003G148600.1	3e-16
21-101:	Potri.001G082200.1	Potri.003G148300.1	3e-115
21-102:	Potri.001G082300.1	Potri.003G148100.1	3e-22
21-103:	Potri.001G082900.1	Potri.003G148000.1	0
21-104:	Potri.001G083100.1	Potri.003G147700.1	0
21-105:	Potri.001G083200.1	Potri.003G147600.1	0
21-106:	Potri.001G083300.1	Potri.003G147500.1	4e-24
21-107:	Potri.001G083400.1	Potri.003G147400.1	0
21-108:	Potri.001G083500.1	Potri.003G147300.1	0
21-109:	Potri.001G083700.1	Potri.003G147200.1	1e-36
21-110:	Potri.001G083800.1	Potri.003G146900.1	1e-117
21-111:	Potri.001G083900.1	Potri.003G146800.1	0
21-112:	Potri.001G084000.1	Potri.003G146600.1	1e-111
21-113:	Potri.001G084100.1	Potri.003G146500.1	3e-20
21-114:	Potri.001G084200.1	Potri.003G146400.1	5e-101
21-115:	Potri.001G084300.1	Potri.003G146300.1	0
21-116:	Potri.001G084600.1	Potri.003G146100.1	1e-123
21-117:	Potri.001G084700.1	Potri.003G146000.1	0
21-118:	Potri.001G084800.1	Potri.003G145800.1	3e-50
21-119:	Potri.001G084900.1	Potri.003G145700.1	1e-77
21-120:	Potri.001G085000.1	Potri.003G145600.1	3e-129
21-121:	Potri.001G085400.1	Potri.003G145400.1	2e-70
21-122:	Potri.001G085500.1	Potri.003G145300.1	0
21-123:	Potri.001G085600.1	Potri.003G145200.1	0
21-124:	Potri.001G085800.1	Potri.003G145100.1	7e-154
21-125:	Potri.001G085900.1	Potri.003G145000.1	0
21-126:	Potri.001G086000.1	Potri.003G144900.1	0
21-127:	Potri.001G086100.1	Potri.003G144700.1	0
21-128:	Potri.001G086300.1	Potri.003G144600.1	1e-108
21-129:	Potri.001G086400.1	Potri.003G144500.1	2e-167
21-130:	Potri.001G086600.1	Potri.003G144400.1	0
21-131:	Potri.001G086700.1	Potri.003G144200.1	5e-154
21-132:	Potri.001G086900.1	Potri.003G144100.1	0
21-133:	Potri.001G087100.1	Potri.003G143900.1	0
21-134:	Potri.001G087200.1	Potri.003G143800.1	3e-37
21-135:	Potri.001G087400.1	Potri.003G143700.1	0
21-136:	Potri.001G087500.1	Potri.003G143600.1	0
21-137:	Potri.001G087600.1	Potri.003G143500.1	0
21-138:	Potri.001G087700.1	Potri.003G143300.1	2e-20
21-139:	Potri.001G087800.1	Potri.003G143200.1	0
21-140:	Potri.001G087900.1	Potri.003G143000.1	0
21-141:	Potri.001G088000.1	Potri.003G142900.1	0
21-142:	Potri.001G088100.1	Potri.003G142800.1	5e-174
21-143:	Potri.001G088200.1	Potri.003G142700.1	1e-173
21-144:	Potri.001G088400.1	Potri.003G142600.1	2e-122
21-145:	Potri.001G088500.1	Potri.003G142300.1	2e-26
21-146:	Potri.001G088600.1	Potri.003G142100.1	0
21-147:	Potri.001G088700.1	Potri.003G142000.1	0
21-148:	Potri.001G088800.1	Potri.003G141900.1	0
21-149:	Potri.001G088900.1	Potri.003G141800.1	5e-171
21-150:	Potri.001G089500.1	Potri.003G141700.1	3e-85
21-151:	Potri.001G089600.1	Potri.003G141600.1	0
21-152:	Potri.001G089700.1	Potri.003G141500.1	0
21-153:	Potri.001G090200.1	Potri.003G141400.1	3e-83
21-154:	Potri.001G090400.1	Potri.003G141200.1	1e-116
21-155:	Potri.001G090500.1	Potri.003G141100.1	0
21-156:	Potri.001G090600.1	Potri.003G141000.1	0
21-157:	Potri.001G090700.1	Potri.003G140900.1	0
21-158:	Potri.001G090800.1	Potri.003G140800.1	0
21-159:	Potri.001G090900.1	Potri.003G140700.1	5e-116
21-160:	Potri.001G091000.1	Potri.003G140600.1	6e-68
21-161:	Potri.001G091100.1	Potri.003G140500.1	7e-96
21-162:	Potri.001G091300.1	Potri.003G140400.1	1e-132
21-163:	Potri.001G091400.1	Potri.003G140200.1	1e-60
21-164:	Potri.001G091500.1	Potri.003G140100.1	1e-60
21-165:	Potri.001G091600.1	Potri.003G140000.1	0
21-166:	Potri.001G091700.1	Potri.003G139900.1	0
21-167:	Potri.001G091800.1	Potri.003G139800.1	2e-73
21-168:	Potri.001G091900.1	Potri.003G139700.1	0
21-169:	Potri.001G092200.1	Potri.003G139600.1	0
21-170:	Potri.001G092300.1	Potri.003G139400.1	0
21-171:	Potri.001G092400.1	Potri.003G139300.1	1e-170
21-172:	Potri.001G092500.1	Potri.003G139200.1	1e-133
21-173:	Potri.001G092600.1	Potri.003G139000.1	9e-75
21-174:	Potri.001G092700.1	Potri.003G138800.1	3e-57
21-175:	Potri.001G092900.1	Potri.003G138600.1	0
21-176:	Potri.001G093000.1	Potri.003G138500.1	2e-72
21-177:	Potri.001G093300.1	Potri.003G138400.1	6e-172
21-178:	Potri.001G093400.1	Potri.003G138300.1	2e-17
21-179:	Potri.001G093600.1	Potri.003G138100.1	0
21-180:	Potri.001G093700.1	Potri.003G138000.1	0
21-181:	Potri.001G093800.1	Potri.003G137800.1	0
21-182:	Potri.001G093900.1	Potri.003G137700.1	0
21-183:	Potri.001G094000.1	Potri.003G137600.1	5e-46
21-184:	Potri.001G094100.1	Potri.003G137500.1	0
21-185:	Potri.001G094200.1	Potri.003G137300.1	1e-90
21-186:	Potri.001G094400.1	Potri.003G137200.1	0
21-187:	Potri.001G094500.1	Potri.003G137100.1	0
21-188:	Potri.001G094600.1	Potri.003G136800.1	0
21-189:	Potri.001G094700.1	Potri.003G136600.1	2e-22
21-190:	Potri.001G094800.1	Potri.003G136300.1	0
21-191:	Potri.001G094900.1	Potri.003G136200.1	5e-109
21-192:	Potri.001G095200.1	Potri.003G136100.1	0
21-193:	Potri.001G095400.1	Potri.003G136000.1	9e-61
21-194:	Potri.001G095500.1	Potri.003G135900.1	5e-59
21-195:	Potri.001G095600.1	Potri.003G135700.1	9e-152
21-196:	Potri.001G095800.1	Potri.003G135600.1	0
21-197:	Potri.001G095900.1	Potri.003G135500.1	1e-125
21-198:	Potri.001G096000.1	Potri.003G135400.1	0
21-199:	Potri.001G096100.1	Potri.003G135300.1	0
21-200:	Potri.001G096200.1	Potri.003G135000.1	0
21-201:	Potri.001G096400.1	Potri.003G134900.1	0
21-202:	Potri.001G096500.1	Potri.003G134600.1	3e-64
21-203:	Potri.001G096600.1	Potri.003G134400.1	3e-79
21-204:	Potri.001G097100.1	Potri.003G134300.1	3e-29
21-205:	Potri.001G097200.1	Potri.003G134200.1	0
21-206:	Potri.001G097300.1	Potri.003G134100.1	0
21-207:	Potri.001G097400.1	Potri.003G134000.1	0
21-208:	Potri.001G097500.1	Potri.003G133800.1	0
21-209:	Potri.001G097600.1	Potri.003G133700.1	0
21-210:	Potri.001G097700.1	Potri.003G133600.1	1e-144
21-211:	Potri.001G098000.1	Potri.003G133500.1	0
21-212:	Potri.001G098100.1	Potri.003G133400.1	1e-115
21-213:	Potri.001G098300.1	Potri.003G133300.1	0
21-214:	Potri.001G098400.1	Potri.003G133200.1	3e-132
21-215:	Potri.001G098500.1	Potri.003G133100.1	0
21-216:	Potri.001G098700.1	Potri.003G132900.1	0
21-217:	Potri.001G099000.1	Potri.003G132700.1	7e-96
21-218:	Potri.001G099300.1	Potri.003G132400.1	5e-156
21-219:	Potri.001G099400.1	Potri.003G132300.1	0
21-220:	Potri.001G099500.1	Potri.003G132200.1	5e-72
21-221:	Potri.001G099700.1	Potri.003G132100.1	0
21-222:	Potri.001G099800.1	Potri.003G132000.1	0
21-223:	Potri.001G100000.1	Potri.003G131700.1	0
21-224:	Potri.001G100100.1	Potri.003G131600.1	2e-52
21-225:	Potri.001G100500.1	Potri.003G131500.1	2e-170
21-226:	Potri.001G100700.1	Potri.003G131400.1	0
21-227:	Potri.001G100800.1	Potri.003G131300.1	0
21-228:	Potri.001G100900.1	Potri.003G131000.1	0
21-229:	Potri.001G101000.1	Potri.003G130900.1	3e-90
21-230:	Potri.001G101100.1	Potri.003G130700.1	3e-170
21-231:	Potri.001G101200.1	Potri.003G130500.1	0
21-232:	Potri.001G101400.1	Potri.003G130400.1	0
21-233:	Potri.001G101500.1	Potri.003G130300.1	1e-30
21-234:	Potri.001G101600.1	Potri.003G130100.1	2e-149
21-235:	Potri.001G101700.1	Potri.003G129900.1	4e-116
21-236:	Potri.001G101800.1	Potri.003G129800.1	0
21-237:	Potri.001G101900.1	Potri.003G129700.1	3e-131
21-238:	Potri.001G102000.1	Potri.003G129500.1	0
21-239:	Potri.001G102200.1	Potri.003G129400.1	0
21-240:	Potri.001G102300.1	Potri.003G129300.1	0
21-241:	Potri.001G102900.1	Potri.003G129000.1	0
21-242:	Potri.001G103000.1	Potri.003G128700.1	4e-158
21-243:	Potri.001G103100.1	Potri.003G128500.1	0
21-244:	Potri.001G103200.1	Potri.003G128400.1	0
21-245:	Potri.001G103600.1	Potri.003G128000.1	0
21-246:	Potri.001G103800.1	Potri.003G127900.1	4e-58
21-247:	Potri.001G104000.1	Potri.003G127800.1	0
21-248:	Potri.001G104200.1	Potri.003G127500.1	0
21-249:	Potri.001G104300.1	Potri.003G127300.1	2e-73
21-250:	Potri.001G104400.1	Potri.003G127100.1	0
21-251:	Potri.001G104500.1	Potri.003G126900.1	0
21-252:	Potri.001G104600.1	Potri.003G126800.1	0
21-253:	Potri.001G104700.1	Potri.003G126700.1	0
21-254:	Potri.001G104900.1	Potri.003G126500.1	0
21-255:	Potri.001G105000.1	Potri.003G126200.1	1e-22
21-256:	Potri.001G105100.1	Potri.003G126100.1	1e-90
21-257:	Potri.001G105300.1	Potri.003G126000.1	0
21-258:	Potri.001G105400.1	Potri.003G125900.1	0
21-259:	Potri.001G105500.1	Potri.003G125800.1	3e-34
21-260:	Potri.001G105700.1	Potri.003G125600.1	1e-22
21-261:	Potri.001G106100.1	Potri.003G125400.1	0
21-262:	Potri.001G106300.1	Potri.003G125200.1	2e-61
21-263:	Potri.001G106500.1	Potri.003G125000.1	3e-35
21-264:	Potri.001G106600.1	Potri.003G124800.1	0
21-265:	Potri.001G106700.1	Potri.003G124600.1	0
21-266:	Potri.001G106900.1	Potri.003G124500.1	7e-74
21-267:	Potri.001G107000.1	Potri.003G124400.1	5e-87
21-268:	Potri.001G107100.1	Potri.003G124300.1	9e-113
21-269:	Potri.001G107300.1	Potri.003G124100.1	0
21-270:	Potri.001G107400.1	Potri.003G124000.1	9e-37
21-271:	Potri.001G107500.1	Potri.003G123900.1	2e-35
21-272:	Potri.001G107900.1	Potri.003G123600.1	5e-140
21-273:	Potri.001G108200.1	Potri.003G123500.1	2e-133
21-274:	Potri.001G108500.1	Potri.003G123000.1	2e-28
21-275:	Potri.001G108700.1	Potri.003G122900.1	0
21-276:	Potri.001G108800.1	Potri.003G122800.1	0
21-277:	Potri.001G108900.1	Potri.003G122700.1	3e-44
21-278:	Potri.001G109000.1	Potri.003G122600.1	2e-105
21-279:	Potri.001G109100.1	Potri.003G122500.1	0
21-280:	Potri.001G109400.1	Potri.003G122400.1	0
21-281:	Potri.001G109500.1	Potri.003G122300.1	0
21-282:	Potri.001G109600.1	Potri.003G122100.1	2e-114
21-283:	Potri.001G109700.1	Potri.003G122000.1	9e-99
21-284:	Potri.001G109800.1	Potri.003G121900.1	0
21-285:	Potri.001G109900.1	Potri.003G121800.1	4e-58
21-286:	Potri.001G110100.1	Potri.003G121700.1	0
21-287:	Potri.001G110200.1	Potri.003G121600.1	0
21-288:	Potri.001G110300.1	Potri.003G121500.1	3e-179
21-289:	Potri.001G110400.1	Potri.003G121300.1	0
21-290:	Potri.001G110500.1	Potri.003G121200.1	9e-102
21-291:	Potri.001G110900.1	Potri.003G121100.1	0
21-292:	Potri.001G111000.1	Potri.003G121000.1	0
21-293:	Potri.001G111100.1	Potri.003G120900.1	0
21-294:	Potri.001G111200.1	Potri.003G120800.1	1e-78
21-295:	Potri.001G111400.1	Potri.003G120600.1	0
21-296:	Potri.001G111600.1	Potri.003G120500.1	0
21-297:	Potri.001G111700.1	Potri.003G120300.1	0
21-298:	Potri.001G111800.1	Potri.003G120200.1	2e-100
21-299:	Potri.001G111900.1	Potri.003G120100.1	2e-102
21-300:	Potri.001G112000.1	Potri.003G120000.1	0
21-301:	Potri.001G112300.1	Potri.003G119800.1	0
21-302:	Potri.001G112400.1	Potri.003G119700.1	8e-130
21-303:	Potri.001G112500.1	Potri.003G119600.1	5e-14
21-304:	Potri.001G112700.1	Potri.003G119500.1	0
21-305:	Potri.001G112800.1	Potri.003G119400.1	0
21-306:	Potri.001G113000.1	Potri.003G119200.1	4e-179
21-307:	Potri.001G113100.1	Potri.003G119100.1	0
21-308:	Potri.001G113200.1	Potri.003G119000.1	2e-104
21-309:	Potri.001G113600.1	Potri.003G118600.1	1e-167
21-310:	Potri.001G113700.1	Potri.003G118500.1	0
21-311:	Potri.001G113800.1	Potri.003G118400.1	0
21-312:	Potri.001G113900.1	Potri.003G118200.1	0
21-313:	Potri.001G114000.1	Potri.003G118100.1	2e-115
21-314:	Potri.001G114100.1	Potri.003G118000.1	0
21-315:	Potri.001G114200.1	Potri.003G117900.1	2e-40
21-316:	Potri.001G114400.1	Potri.003G117800.1	0
21-317:	Potri.001G114500.1	Potri.003G117500.1	0
21-318:	Potri.001G114600.1	Potri.003G117400.1	0
21-319:	Potri.001G114700.1	Potri.003G117300.1	6e-61
21-320:	Potri.001G114900.1	Potri.003G117200.1	1e-62
21-321:	Potri.001G115000.1	Potri.003G117100.1	4e-106
21-322:	Potri.001G115100.1	Potri.003G117000.1	0
21-323:	Potri.001G115200.1	Potri.003G116900.1	0
21-324:	Potri.001G115400.1	Potri.003G116700.1	0
21-325:	Potri.001G115600.1	Potri.003G116600.1	0
21-326:	Potri.001G115800.1	Potri.003G116500.1	9e-158
21-327:	Potri.001G116100.1	Potri.003G116400.1	1e-94
21-328:	Potri.001G116200.1	Potri.003G116200.1	4e-107
21-329:	Potri.001G116300.1	Potri.003G116100.1	1e-155
21-330:	Potri.001G116500.1	Potri.003G116000.1	0
21-331:	Potri.001G116600.1	Potri.003G115900.1	0
21-332:	Potri.001G116900.1	Potri.003G115800.1	0
21-333:	Potri.001G117000.1	Potri.003G115700.1	0
21-334:	Potri.001G117100.1	Potri.003G115600.1	0
21-335:	Potri.001G117200.1	Potri.003G115500.1	0
21-336:	Potri.001G117400.1	Potri.003G115400.1	0
21-337:	Potri.001G117500.1	Potri.003G115300.1	3e-144
21-338:	Potri.001G117600.1	Potri.003G115200.1	4e-143
21-339:	Potri.001G117800.1	Potri.003G115100.1	0
21-340:	Potri.001G117900.1	Potri.003G115000.1	9e-103
21-341:	Potri.001G118000.1	Potri.003G114900.1	0
21-342:	Potri.001G118100.1	Potri.003G114800.1	2e-94
21-343:	Potri.001G118400.1	Potri.003G114400.1	0
21-344:	Potri.001G118700.1	Potri.003G114200.1	2e-107
21-345:	Potri.001G118800.1	Potri.003G114100.1	0
21-346:	Potri.001G118900.1	Potri.003G114000.1	0
21-347:	Potri.001G119000.1	Potri.003G113900.1	1e-62
21-348:	Potri.001G119200.1	Potri.003G113700.1	6e-53
21-349:	Potri.001G119300.1	Potri.003G113600.1	3e-113
21-350:	Potri.001G119500.1	Potri.003G113400.1	0
21-351:	Potri.001G119800.1	Potri.003G113300.1	0
21-352:	Potri.001G119900.1	Potri.003G113100.1	2e-94
21-353:	Potri.001G120000.1	Potri.003G113000.1	0
21-354:	Potri.001G120100.1	Potri.003G112900.1	7e-39
21-355:	Potri.001G120200.1	Potri.003G112800.1	1e-136
21-356:	Potri.001G120300.1	Potri.003G112700.1	0
21-357:	Potri.001G120400.1	Potri.003G112500.1	2e-17
21-358:	Potri.001G120500.1	Potri.003G112400.1	0
21-359:	Potri.001G120800.1	Potri.003G112200.1	0
21-360:	Potri.001G121000.1	Potri.003G112100.1	1e-77
21-361:	Potri.001G121200.1	Potri.003G112000.1	0
21-362:	Potri.001G121300.1	Potri.003G111900.1	9e-177
21-363:	Potri.001G121600.1	Potri.003G111800.1	2e-178
21-364:	Potri.001G121700.1	Potri.003G111600.1	0
21-365:	Potri.001G121800.1	Potri.003G111400.1	5e-37
21-366:	Potri.001G122400.1	Potri.003G111200.1	0
21-367:	Potri.001G122700.1	Potri.003G110900.1	1e-37
21-368:	Potri.001G122800.1	Potri.003G110800.1	0
21-369:	Potri.001G123100.1	Potri.003G110700.1	0
21-370:	Potri.001G123300.1	Potri.003G110200.1	4e-48
21-371:	Potri.001G123400.1	Potri.003G110100.1	0
21-372:	Potri.001G123500.1	Potri.003G110000.1	0
21-373:	Potri.001G123600.1	Potri.003G109900.1	0
21-374:	Potri.001G123700.1	Potri.003G109700.1	0
21-375:	Potri.001G123900.1	Potri.003G109500.1	1e-39
21-376:	Potri.001G124000.1	Potri.003G109400.1	0
21-377:	Potri.001G124200.1	Potri.003G109300.1	0
21-378:	Potri.001G124300.1	Potri.003G109000.1	2e-179
21-379:	Potri.001G124400.1	Potri.003G108900.1	2e-143
21-380:	Potri.001G124500.1	Potri.003G108800.1	4e-160
21-381:	Potri.001G124700.1	Potri.003G108700.1	8e-42
21-382:	Potri.001G124800.1	Potri.003G108500.1	1e-165
21-383:	Potri.001G125000.1	Potri.003G108400.1	0
21-384:	Potri.001G125100.1	Potri.003G108300.1	1e-16
21-385:	Potri.001G125500.1	Potri.003G108100.1	2e-141
21-386:	Potri.001G125700.1	Potri.003G108000.1	0
21-387:	Potri.001G125800.1	Potri.003G107900.1	0
21-388:	Potri.001G126100.1	Potri.003G107600.1	0
21-389:	Potri.001G126200.1	Potri.003G107500.1	1e-107
21-390:	Potri.001G126300.1	Potri.003G107400.1	2e-163
21-391:	Potri.001G126400.1	Potri.003G107200.1	0
21-392:	Potri.001G126500.1	Potri.003G107000.1	0
21-393:	Potri.001G126600.1	Potri.003G106900.1	1e-79
21-394:	Potri.001G126800.1	Potri.003G106800.1	0
21-395:	Potri.001G127100.1	Potri.003G106600.1	0
21-396:	Potri.001G127300.1	Potri.003G106400.1	0
21-397:	Potri.001G127700.1	Potri.003G106100.1	5e-157
21-398:	Potri.001G128200.1	Potri.003G105600.1	0
21-399:	Potri.001G128300.1	Potri.003G105500.1	0
21-400:	Potri.001G128500.1	Potri.003G105400.1	0
21-401:	Potri.001G128800.1	Potri.003G105200.1	0
21-402:	Potri.001G128900.1	Potri.003G105100.1	8e-32
21-403:	Potri.001G129000.1	Potri.003G105000.1	0
21-404:	Potri.001G129100.1	Potri.003G104900.1	0
21-405:	Potri.001G129400.1	Potri.003G104600.1	3e-62
21-406:	Potri.001G129700.1	Potri.003G104200.1	0
21-407:	Potri.001G130200.1	Potri.003G103700.1	3e-54
21-408:	Potri.001G130500.1	Potri.003G103400.1	2e-152
21-409:	Potri.001G130600.1	Potri.003G103300.1	5e-180
21-410:	Potri.001G130700.1	Potri.003G103200.1	0
21-411:	Potri.001G130800.1	Potri.003G103100.1	0
21-412:	Potri.001G130900.1	Potri.003G103000.1	0
21-413:	Potri.001G131000.1	Potri.003G102800.1	3e-138
21-414:	Potri.001G131100.1	Potri.003G102700.1	6e-72
21-415:	Potri.001G131400.1	Potri.003G102400.1	0
21-416:	Potri.001G131500.1	Potri.003G101900.1	8e-42
21-417:	Potri.001G131600.1	Potri.003G101700.1	6e-70
21-418:	Potri.001G131800.1	Potri.003G101500.1	0
21-419:	Potri.001G132100.1	Potri.003G101300.1	4e-79
21-420:	Potri.001G132500.1	Potri.003G100900.1	4e-140
21-421:	Potri.001G132600.1	Potri.003G100800.1	0
21-422:	Potri.001G132800.1	Potri.003G100700.1	2e-174
21-423:	Potri.001G132900.1	Potri.003G100600.1	0
21-424:	Potri.001G133000.1	Potri.003G100500.1	0
21-425:	Potri.001G133200.1	Potri.003G100200.1	1e-165
21-426:	Potri.001G133400.1	Potri.003G100100.1	0
21-427:	Potri.001G133600.1	Potri.003G099900.1	7e-98
21-428:	Potri.001G133800.1	Potri.003G099800.1	0
21-429:	Potri.001G134000.1	Potri.003G099400.1	0
21-430:	Potri.001G134100.1	Potri.003G099300.1	2e-171
21-431:	Potri.001G134300.1	Potri.003G098900.1	0
21-432:	Potri.001G134600.1	Potri.003G098700.1	5e-21
21-433:	Potri.001G135000.1	Potri.003G098600.1	1e-31
21-434:	Potri.001G135100.1	Potri.003G098500.1	3e-32
21-435:	Potri.001G135200.1	Potri.003G098400.1	0
21-436:	Potri.001G135300.1	Potri.003G098200.1	0
21-437:	Potri.001G135500.1	Potri.003G098100.1	0
21-438:	Potri.001G135800.1	Potri.003G098000.1	2e-79
21-439:	Potri.001G135900.1	Potri.003G097700.1	0
21-440:	Potri.001G136000.1	Potri.003G097600.1	0
21-441:	Potri.001G136100.1	Potri.003G097300.1	0
21-442:	Potri.001G136200.1	Potri.003G097100.1	0
21-443:	Potri.001G136300.1	Potri.003G097000.1	5e-69
21-444:	Potri.001G136400.1	Potri.003G096900.1	0
21-445:	Potri.001G136800.1	Potri.003G096800.1	2e-74
21-446:	Potri.001G137200.1	Potri.003G096700.1	0
21-447:	Potri.001G137600.1	Potri.003G096300.1	0
21-448:	Potri.001G137700.1	Potri.003G096100.1	0
21-449:	Potri.001G137800.1	Potri.003G096000.1	0
21-450:	Potri.001G137900.1	Potri.003G095900.1	0
21-451:	Potri.001G138000.1	Potri.003G095700.1	5e-116
21-452:	Potri.001G138200.1	Potri.003G095600.1	2e-125
21-453:	Potri.001G138300.1	Potri.003G095500.1	2e-66
21-454:	Potri.001G138400.1	Potri.003G095400.1	2e-178
21-455:	Potri.001G138500.1	Potri.003G095300.1	1e-176
21-456:	Potri.001G138600.1	Potri.003G095200.1	5e-31
21-457:	Potri.001G138700.1	Potri.003G095100.1	3e-46
21-458:	Potri.001G138900.1	Potri.003G095000.1	0
21-459:	Potri.001G139100.1	Potri.003G094900.1	2e-16
21-460:	Potri.001G139500.1	Potri.003G094500.1	0
21-461:	Potri.001G139600.1	Potri.003G094400.1	0
21-462:	Potri.001G139800.1	Potri.003G094300.1	2e-108
21-463:	Potri.001G139900.1	Potri.003G094200.1	0
21-464:	Potri.001G140000.1	Potri.003G094100.1	0
21-465:	Potri.001G140200.1	Potri.003G094000.1	2e-173
21-466:	Potri.001G140300.1	Potri.003G093900.1	0
21-467:	Potri.001G140700.1	Potri.003G093700.1	0
21-468:	Potri.001G140800.1	Potri.003G093600.1	0
21-469:	Potri.001G140900.1	Potri.003G093500.1	2e-158
21-470:	Potri.001G141100.1	Potri.003G093200.1	0
21-471:	Potri.001G141200.1	Potri.003G093100.1	0
21-472:	Potri.001G141400.1	Potri.003G093000.1	5e-173
21-473:	Potri.001G141500.1	Potri.003G092800.1	8e-135
21-474:	Potri.001G141600.1	Potri.003G092700.1	3e-127
21-475:	Potri.001G141900.1	Potri.003G092500.1	7e-41
21-476:	Potri.001G142000.1	Potri.003G092400.1	0
21-477:	Potri.001G142100.1	Potri.003G092300.1	0
21-478:	Potri.001G142200.1	Potri.003G092200.1	0
21-479:	Potri.001G142300.1	Potri.003G092000.1	3e-23
21-480:	Potri.001G142400.1	Potri.003G091800.1	1e-142
21-481:	Potri.001G142500.1	Potri.003G091700.1	4e-133
21-482:	Potri.001G142600.1	Potri.003G091500.1	0
21-483:	Potri.001G142700.1	Potri.003G091400.1	1e-76
21-484:	Potri.001G142800.1	Potri.003G091300.1	2e-166
21-485:	Potri.001G142900.1	Potri.003G091200.1	9e-143
21-486:	Potri.001G143200.1	Potri.003G091100.1	0
21-487:	Potri.001G143500.1	Potri.003G090900.1	0
21-488:	Potri.001G143800.1	Potri.003G090800.1	0
21-489:	Potri.001G143900.1	Potri.003G090300.1	3e-83
21-490:	Potri.001G144000.1	Potri.003G090200.1	1e-16
21-491:	Potri.001G144100.1	Potri.003G090100.1	0
21-492:	Potri.001G144200.1	Potri.003G090000.1	0
21-493:	Potri.001G144400.1	Potri.003G089800.1	0
21-494:	Potri.001G144500.1	Potri.003G089700.1	0
21-495:	Potri.001G144600.1	Potri.003G089600.1	6e-85
21-496:	Potri.001G144700.1	Potri.003G089500.1	0
21-497:	Potri.001G144800.1	Potri.003G089300.1	8e-109
21-498:	Potri.001G145100.1	Potri.003G089100.1	9e-39
21-499:	Potri.001G145200.1	Potri.003G088800.1	0
21-500:	Potri.001G145300.1	Potri.003G088700.1	0
21-501:	Potri.001G145400.1	Potri.003G088500.1	0
21-502:	Potri.001G145700.1	Potri.003G088400.1	0
21-503:	Potri.001G145900.1	Potri.003G088300.1	0
21-504:	Potri.001G146100.1	Potri.003G087800.1	3e-176
21-505:	Potri.001G146200.1	Potri.003G087700.1	0
21-506:	Potri.001G146400.1	Potri.003G087600.1	0
21-507:	Potri.001G146600.1	Potri.003G087500.1	1e-85
21-508:	Potri.001G147100.1	Potri.003G087200.1	1e-106
21-509:	Potri.001G147200.1	Potri.003G087000.1	2e-173
21-510:	Potri.001G147300.1	Potri.003G086900.1	7e-167
21-511:	Potri.001G147400.1	Potri.003G086800.1	2e-17
21-512:	Potri.001G147900.1	Potri.003G086700.1	5e-90
21-513:	Potri.001G148100.1	Potri.003G086400.1	0
21-514:	Potri.001G148300.1	Potri.003G086200.1	0
21-515:	Potri.001G148400.1	Potri.003G086000.1	0
21-516:	Potri.001G148500.1	Potri.003G085900.1	8e-158
21-517:	Potri.001G148600.1	Potri.003G085800.1	0
21-518:	Potri.001G148700.1	Potri.003G085700.1	6e-102
21-519:	Potri.001G148900.1	Potri.003G085500.1	0
21-520:	Potri.001G149100.1	Potri.003G085300.1	0
21-521:	Potri.001G149200.1	Potri.003G085200.1	2e-173
21-522:	Potri.001G149300.1	Potri.003G085100.1	6e-63
21-523:	Potri.001G149400.1	Potri.003G085000.1	0
21-524:	Potri.001G149600.1	Potri.003G084900.1	0
21-525:	Potri.001G150000.1	Potri.003G084600.1	4e-70
21-526:	Potri.001G150100.1	Potri.003G084400.1	3e-43
21-527:	Potri.001G150200.1	Potri.003G084200.1	4e-106
21-528:	Potri.001G150300.1	Potri.003G083900.1	0
21-529:	Potri.001G150600.1	Potri.003G083800.1	0
21-530:	Potri.001G150700.1	Potri.003G083700.1	0
21-531:	Potri.001G150800.1	Potri.003G083600.1	0
21-532:	Potri.001G151300.1	Potri.003G083500.1	6e-156
21-533:	Potri.001G151500.1	Potri.003G083200.1	6e-165
21-534:	Potri.001G151600.1	Potri.003G082900.1	5e-40
21-535:	Potri.001G151700.1	Potri.003G082800.1	0
21-536:	Potri.001G151800.1	Potri.003G082700.1	4e-146
21-537:	Potri.001G151900.1	Potri.003G082600.1	0
21-538:	Potri.001G152100.1	Potri.003G082500.1	7e-114
21-539:	Potri.001G152300.1	Potri.003G082400.1	0
21-540:	Potri.001G152500.1	Potri.003G082100.1	4e-104
21-541:	Potri.001G152600.1	Potri.003G082000.1	9e-45
21-542:	Potri.001G152700.1	Potri.003G081900.1	2e-35
21-543:	Potri.001G152800.1	Potri.003G081800.1	6e-126
21-544:	Potri.001G152900.1	Potri.003G081700.1	3e-88
21-545:	Potri.001G153000.1	Potri.003G081600.1	2e-165
21-546:	Potri.001G153100.1	Potri.003G081500.1	0
21-547:	Potri.001G153200.1	Potri.003G081300.1	6e-29
21-548:	Potri.001G153400.1	Potri.003G080900.1	0
21-549:	Potri.001G154200.1	Potri.003G080600.1	3e-132
21-550:	Potri.001G154300.1	Potri.003G080400.1	0
21-551:	Potri.001G154400.1	Potri.003G080300.1	5e-153
21-552:	Potri.001G154500.1	Potri.003G080200.1	4e-145
21-553:	Potri.001G154600.1	Potri.003G080100.1	0
21-554:	Potri.001G154700.1	Potri.003G080000.1	0
21-555:	Potri.001G155000.1	Potri.003G079900.1	0
21-556:	Potri.001G155100.1	Potri.003G079800.1	0
21-557:	Potri.001G155200.1	Potri.003G079700.1	0
21-558:	Potri.001G155300.1	Potri.003G079500.1	0
21-559:	Potri.001G155400.1	Potri.003G079400.1	2e-142
21-560:	Potri.001G155500.1	Potri.003G079200.1	0
21-561:	Potri.001G155900.1	Potri.003G078900.1	0
21-562:	Potri.001G156000.1	Potri.003G078800.1	0
21-563:	Potri.001G156100.1	Potri.003G078700.1	2e-148
21-564:	Potri.001G156200.1	Potri.003G078600.1	4e-72
21-565:	Potri.001G156500.1	Potri.003G078100.1	4e-31
21-566:	Potri.001G156600.1	Potri.003G078000.1	2e-155
21-567:	Potri.001G156700.1	Potri.003G077900.1	0
21-568:	Potri.001G157000.1	Potri.003G077800.1	6e-157
21-569:	Potri.001G157100.1	Potri.003G077700.1	7e-98
21-570:	Potri.001G157300.1	Potri.003G077600.1	0
21-571:	Potri.001G157400.1	Potri.003G077500.1	0
21-572:	Potri.001G157500.1	Potri.003G077400.1	0
21-573:	Potri.001G157600.1	Potri.003G077300.1	0
21-574:	Potri.001G157700.1	Potri.003G077200.1	1e-149
21-575:	Potri.001G157800.1	Potri.003G077100.1	0
21-576:	Potri.001G157900.1	Potri.003G077000.1	2e-163
21-577:	Potri.001G158000.1	Potri.003G076800.1	0
21-578:	Potri.001G158100.1	Potri.003G076700.1	2e-59
21-579:	Potri.001G158200.1	Potri.003G076600.1	0
21-580:	Potri.001G158500.1	Potri.003G076500.1	2e-59
21-581:	Potri.001G158600.1	Potri.003G076300.1	0
21-582:	Potri.001G158700.1	Potri.003G076200.1	0
21-583:	Potri.001G158800.1	Potri.003G075800.1	1e-111
21-584:	Potri.001G158900.1	Potri.003G075700.1	0
21-585:	Potri.001G159200.1	Potri.003G075600.1	5e-160
21-586:	Potri.001G159300.1	Potri.003G075200.1	3e-106
21-587:	Potri.001G159400.1	Potri.003G075000.1	0
21-588:	Potri.001G159700.1	Potri.003G074700.1	0
21-589:	Potri.001G159900.1	Potri.003G074600.1	0
21-590:	Potri.001G160600.1	Potri.003G074300.1	0
21-591:	Potri.001G160700.1	Potri.003G074200.1	0
21-592:	Potri.001G160900.1	Potri.003G074100.1	0
21-593:	Potri.001G161000.1	Potri.003G074000.1	0
21-594:	Potri.001G161200.1	Potri.003G073900.1	4e-36
21-595:	Potri.001G161500.1	Potri.003G073800.1	0
21-596:	Potri.001G161600.1	Potri.003G073700.1	0
21-597:	Potri.001G161900.1	Potri.003G073400.1	0
21-598:	Potri.001G162000.1	Potri.003G073300.1	1e-145
21-599:	Potri.001G162100.1	Potri.003G073200.1	3e-98
21-600:	Potri.001G162200.1	Potri.003G073100.1	4e-149
21-601:	Potri.001G162400.1	Potri.003G072800.1	0
21-602:	Potri.001G162700.1	Potri.003G072700.1	0
21-603:	Potri.001G162800.1	Potri.003G072600.1	0
21-604:	Potri.001G162900.1	Potri.003G072500.1	4e-173
21-605:	Potri.001G163100.1	Potri.003G072400.1	1e-69
21-606:	Potri.001G163200.1	Potri.003G072300.1	0
21-607:	Potri.001G163300.1	Potri.003G072100.1	0
21-608:	Potri.001G163400.1	Potri.003G071900.1	9e-96
21-609:	Potri.001G163600.1	Potri.003G071800.1	0
21-610:	Potri.001G163700.1	Potri.003G071700.1	0
21-611:	Potri.001G163900.1	Potri.003G071300.1	0
21-612:	Potri.001G164000.1	Potri.003G071200.1	0
21-613:	Potri.001G164200.1	Potri.003G071100.1	8e-48
21-614:	Potri.001G164300.1	Potri.003G071000.1	2e-73
21-615:	Potri.001G164700.1	Potri.003G070600.1	2e-122
21-616:	Potri.001G164800.1	Potri.003G070500.1	1e-53
21-617:	Potri.001G164900.1	Potri.003G070400.1	0
21-618:	Potri.001G165000.1	Potri.003G070300.1	5e-27
21-619:	Potri.001G165100.1	Potri.003G070200.1	2e-88
21-620:	Potri.001G165600.1	Potri.003G069900.1	7e-163
21-621:	Potri.001G165800.1	Potri.003G069100.1	9e-36
21-622:	Potri.001G166100.1	Potri.003G069000.1	0
21-623:	Potri.001G166200.1	Potri.003G068900.1	3e-132
21-624:	Potri.001G166300.1	Potri.003G068800.1	0
21-625:	Potri.001G166400.1	Potri.003G068700.1	0
21-626:	Potri.001G166500.1	Potri.003G068500.1	0
21-627:	Potri.001G166600.1	Potri.003G068400.1	5e-89
21-628:	Potri.001G166700.1	Potri.003G068300.1	4e-156
21-629:	Potri.001G166800.1	Potri.003G068000.1	0
21-630:	Potri.001G166900.1	Potri.003G067800.1	1e-97
21-631:	Potri.001G167100.1	Potri.003G067700.1	0
21-632:	Potri.001G167300.1	Potri.003G067000.1	0
21-633:	Potri.001G167800.1	Potri.003G066400.1	0
21-634:	Potri.001G168000.1	Potri.003G066300.1	0
21-635:	Potri.001G168100.1	Potri.003G066200.1	0
21-636:	Potri.001G168200.1	Potri.003G066000.1	0
21-637:	Potri.001G168400.1	Potri.003G065900.1	1e-76
21-638:	Potri.001G168700.1	Potri.003G065500.1	0
21-639:	Potri.001G168800.1	Potri.003G065400.1	0
21-640:	Potri.001G169000.1	Potri.003G065300.1	4e-139
21-641:	Potri.001G169100.1	Potri.003G065000.1	0
21-642:	Potri.001G169200.1	Potri.003G064900.1	1e-28
21-643:	Potri.001G169500.1	Potri.003G064700.1	0
21-644:	Potri.001G169600.1	Potri.003G064600.1	9e-111
21-645:	Potri.001G169700.1	Potri.003G064300.1	4e-58
21-646:	Potri.001G169900.1	Potri.003G064100.1	5e-152
21-647:	Potri.001G170100.1	Potri.003G063900.1	4e-77
21-648:	Potri.001G170200.1	Potri.003G063700.1	0
21-649:	Potri.001G170300.1	Potri.003G063500.1	0
21-650:	Potri.001G170500.1	Potri.003G063400.1	0
21-651:	Potri.001G170700.1	Potri.003G063300.1	0
21-652:	Potri.001G170800.1	Potri.003G063200.1	0
21-653:	Potri.001G171000.1	Potri.003G063100.1	0
21-654:	Potri.001G171100.1	Potri.003G063000.1	0
21-655:	Potri.001G171200.1	Potri.003G062800.1	2e-129
21-656:	Potri.001G171300.1	Potri.003G062700.1	0
21-657:	Potri.001G171500.1	Potri.003G062600.1	3e-161
21-658:	Potri.001G171600.1	Potri.003G062400.1	2e-108
21-659:	Potri.001G171700.1	Potri.003G062300.1	5e-48
21-660:	Potri.001G172100.1	Potri.003G062200.1	2e-73
21-661:	Potri.001G172300.1	Potri.003G062100.1	0
21-662:	Potri.001G172400.1	Potri.003G061700.1	0
21-663:	Potri.001G172600.1	Potri.003G061400.1	6e-97
21-664:	Potri.001G172700.1	Potri.003G061300.1	4e-100
21-665:	Potri.001G173100.1	Potri.003G060900.1	0
21-666:	Potri.001G173400.1	Potri.003G060800.1	1e-110
21-667:	Potri.001G173500.1	Potri.003G060500.1	0
21-668:	Potri.001G173600.1	Potri.003G060400.1	1e-70
21-669:	Potri.001G173700.1	Potri.003G060300.1	0
21-670:	Potri.001G173800.1	Potri.003G060100.1	2e-75
21-671:	Potri.001G174300.1	Potri.003G059900.1	8e-76
21-672:	Potri.001G174400.1	Potri.003G059800.1	0
21-673:	Potri.001G174500.1	Potri.003G059700.1	0
21-674:	Potri.001G174600.1	Potri.003G059500.1	0
21-675:	Potri.001G174900.1	Potri.003G059400.1	0
21-676:	Potri.001G175000.1	Potri.003G059200.1	0
21-677:	Potri.001G175200.1	Potri.003G058900.1	0
21-678:	Potri.001G175400.1	Potri.003G058800.1	0
21-679:	Potri.001G175500.1	Potri.003G058600.1	0
## Alignment 22: score=15934.0 e_value=0 N=341 Chr01&Chr03 minus
22- 0:	Potri.001G000500.1	Potri.003G224100.1	0
22- 1:	Potri.001G000700.1	Potri.003G224000.1	0
22- 2:	Potri.001G000800.1	Potri.003G223800.1	0
22- 3:	Potri.001G000900.1	Potri.003G223600.1	1e-88
22- 4:	Potri.001G001100.1	Potri.003G223500.1	3e-98
22- 5:	Potri.001G001200.1	Potri.003G223400.1	0
22- 6:	Potri.001G001400.1	Potri.003G223300.1	2e-116
22- 7:	Potri.001G001500.1	Potri.003G223200.1	0
22- 8:	Potri.001G001600.1	Potri.003G223100.1	0
22- 9:	Potri.001G001700.1	Potri.003G223000.1	0
22- 10:	Potri.001G002000.1	Potri.003G222700.1	0
22- 11:	Potri.001G002300.1	Potri.003G222600.1	0
22- 12:	Potri.001G002400.1	Potri.003G222500.1	2e-21
22- 13:	Potri.001G002500.1	Potri.003G222400.1	0
22- 14:	Potri.001G002600.1	Potri.003G222300.1	0
22- 15:	Potri.001G002700.1	Potri.003G222200.1	1e-151
22- 16:	Potri.001G003200.1	Potri.003G222000.1	4e-39
22- 17:	Potri.001G003300.1	Potri.003G221800.1	7e-84
22- 18:	Potri.001G003500.1	Potri.003G221500.1	5e-45
22- 19:	Potri.001G003600.1	Potri.003G221400.1	3e-136
22- 20:	Potri.001G003800.1	Potri.003G221200.1	0
22- 21:	Potri.001G003900.1	Potri.003G221100.1	0
22- 22:	Potri.001G004000.1	Potri.003G221000.1	1e-132
22- 23:	Potri.001G004100.1	Potri.003G220900.1	3e-29
22- 24:	Potri.001G004200.1	Potri.003G220800.1	0
22- 25:	Potri.001G004500.1	Potri.003G220400.1	0
22- 26:	Potri.001G004600.1	Potri.003G220300.1	0
22- 27:	Potri.001G004700.1	Potri.003G220200.1	2e-146
22- 28:	Potri.001G004800.1	Potri.003G220100.1	0
22- 29:	Potri.001G004900.1	Potri.003G220000.1	7e-30
22- 30:	Potri.001G005100.1	Potri.003G219900.1	0
22- 31:	Potri.001G005300.1	Potri.003G219700.1	1e-11
22- 32:	Potri.001G005400.1	Potri.003G219300.1	2e-131
22- 33:	Potri.001G005500.1	Potri.003G219200.1	2e-129
22- 34:	Potri.001G005700.1	Potri.003G218900.1	0
22- 35:	Potri.001G006200.1	Potri.003G218800.1	0
22- 36:	Potri.001G006300.1	Potri.003G218700.1	3e-120
22- 37:	Potri.001G006400.1	Potri.003G218600.1	1e-106
22- 38:	Potri.001G006500.1	Potri.003G218500.1	0
22- 39:	Potri.001G007000.1	Potri.003G218400.1	0
22- 40:	Potri.001G007400.1	Potri.003G218200.1	0
22- 41:	Potri.001G007600.1	Potri.003G218000.1	6e-37
22- 42:	Potri.001G007800.1	Potri.003G217900.1	0
22- 43:	Potri.001G007900.1	Potri.003G217800.1	0
22- 44:	Potri.001G008000.1	Potri.003G217700.1	0
22- 45:	Potri.001G008100.1	Potri.003G217500.1	1e-25
22- 46:	Potri.001G008300.1	Potri.003G217200.1	6e-32
22- 47:	Potri.001G008500.1	Potri.003G217000.1	3e-58
22- 48:	Potri.001G008600.1	Potri.003G216900.1	3e-20
22- 49:	Potri.001G008700.1	Potri.003G216800.1	0
22- 50:	Potri.001G008900.1	Potri.003G216500.1	3e-158
22- 51:	Potri.001G009100.1	Potri.003G216200.1	6e-103
22- 52:	Potri.001G009200.1	Potri.003G216100.1	1e-55
22- 53:	Potri.001G009300.1	Potri.003G216000.1	9e-64
22- 54:	Potri.001G009400.1	Potri.003G215900.1	5e-52
22- 55:	Potri.001G009600.1	Potri.003G215800.1	6e-163
22- 56:	Potri.001G009700.1	Potri.003G215700.1	0
22- 57:	Potri.001G009900.1	Potri.003G215600.1	2e-100
22- 58:	Potri.001G010400.1	Potri.003G215500.1	9e-23
22- 59:	Potri.001G010500.1	Potri.003G215400.1	0
22- 60:	Potri.001G010600.1	Potri.003G215300.1	2e-36
22- 61:	Potri.001G010700.1	Potri.003G215200.1	0
22- 62:	Potri.001G010800.1	Potri.003G215100.1	0
22- 63:	Potri.001G011300.1	Potri.003G214900.1	0
22- 64:	Potri.001G011500.1	Potri.003G214700.1	5e-135
22- 65:	Potri.001G011800.1	Potri.003G214300.1	0
22- 66:	Potri.001G011900.1	Potri.003G214200.1	0
22- 67:	Potri.001G012300.1	Potri.003G214100.1	0
22- 68:	Potri.001G012500.1	Potri.003G213800.1	1e-20
22- 69:	Potri.001G012800.1	Potri.003G213600.1	0
22- 70:	Potri.001G013200.1	Potri.003G213200.1	0
22- 71:	Potri.001G013300.1	Potri.003G213000.1	3e-129
22- 72:	Potri.001G013400.1	Potri.003G212900.1	0
22- 73:	Potri.001G013500.1	Potri.003G212700.1	0
22- 74:	Potri.001G013600.1	Potri.003G212500.1	0
22- 75:	Potri.001G013700.1	Potri.003G212400.1	2e-153
22- 76:	Potri.001G013800.1	Potri.003G212300.1	0
22- 77:	Potri.001G014000.1	Potri.003G212200.1	1e-76
22- 78:	Potri.001G014100.1	Potri.003G212000.1	0
22- 79:	Potri.001G014700.1	Potri.003G211800.1	0
22- 80:	Potri.001G015000.1	Potri.003G211200.1	2e-77
22- 81:	Potri.001G015100.1	Potri.003G211100.1	0
22- 82:	Potri.001G015700.1	Potri.003G210800.1	0
22- 83:	Potri.001G015900.1	Potri.003G210500.1	0
22- 84:	Potri.001G016300.1	Potri.003G210400.1	0
22- 85:	Potri.001G016600.1	Potri.003G210200.1	0
22- 86:	Potri.001G016900.1	Potri.003G208800.1	7e-55
22- 87:	Potri.001G017000.1	Potri.003G207600.1	0
22- 88:	Potri.001G017100.1	Potri.003G207400.1	0
22- 89:	Potri.001G017300.1	Potri.003G207200.1	5e-146
22- 90:	Potri.001G017400.1	Potri.003G207100.1	3e-55
22- 91:	Potri.001G017500.1	Potri.003G207000.1	0
22- 92:	Potri.001G017700.1	Potri.003G206200.1	2e-125
22- 93:	Potri.001G018200.1	Potri.003G206000.1	0
22- 94:	Potri.001G018300.1	Potri.003G205800.1	0
22- 95:	Potri.001G018400.1	Potri.003G205700.1	0
22- 96:	Potri.001G018600.1	Potri.003G205500.1	7e-115
22- 97:	Potri.001G018700.1	Potri.003G205400.1	0
22- 98:	Potri.001G018800.1	Potri.003G205100.1	0
22- 99:	Potri.001G018900.1	Potri.003G205000.1	0
22-100:	Potri.001G019000.1	Potri.003G204900.1	0
22-101:	Potri.001G019100.1	Potri.003G204800.1	0
22-102:	Potri.001G019200.1	Potri.003G204700.1	0
22-103:	Potri.001G019400.1	Potri.003G204600.1	0
22-104:	Potri.001G019600.1	Potri.003G204500.1	3e-161
22-105:	Potri.001G020200.1	Potri.003G204400.1	2e-109
22-106:	Potri.001G020300.1	Potri.003G204300.1	0
22-107:	Potri.001G020400.1	Potri.003G204200.1	4e-81
22-108:	Potri.001G020500.1	Potri.003G204100.1	2e-148
22-109:	Potri.001G020600.1	Potri.003G204000.1	0
22-110:	Potri.001G020700.1	Potri.003G203900.1	3e-93
22-111:	Potri.001G020800.1	Potri.003G203800.1	0
22-112:	Potri.001G020900.1	Potri.003G203600.1	0
22-113:	Potri.001G021600.1	Potri.003G203500.1	4e-37
22-114:	Potri.001G022500.1	Potri.003G203300.1	2e-33
22-115:	Potri.001G022700.1	Potri.003G202900.1	0
22-116:	Potri.001G022900.1	Potri.003G202700.1	0
22-117:	Potri.001G023100.1	Potri.003G202500.1	9e-98
22-118:	Potri.001G023400.1	Potri.003G202200.1	0
22-119:	Potri.001G023500.1	Potri.003G202100.1	0
22-120:	Potri.001G023900.1	Potri.003G201600.1	0
22-121:	Potri.001G024000.1	Potri.003G201500.1	5e-118
22-122:	Potri.001G024100.1	Potri.003G201400.1	0
22-123:	Potri.001G024400.1	Potri.003G201200.1	2e-37
22-124:	Potri.001G024500.1	Potri.003G201100.1	0
22-125:	Potri.001G024600.1	Potri.003G201000.1	0
22-126:	Potri.001G024800.1	Potri.003G200700.1	1e-89
22-127:	Potri.001G025100.1	Potri.003G199700.1	0
22-128:	Potri.001G025600.1	Potri.003G199300.1	5e-18
22-129:	Potri.001G026000.1	Potri.003G198800.1	1e-126
22-130:	Potri.001G026100.1	Potri.003G198700.1	0
22-131:	Potri.001G026200.1	Potri.003G198600.1	0
22-132:	Potri.001G026300.1	Potri.003G198500.1	0
22-133:	Potri.001G026400.1	Potri.003G198300.1	0
22-134:	Potri.001G026500.1	Potri.003G198200.1	1e-59
22-135:	Potri.001G026600.1	Potri.003G198100.1	1e-165
22-136:	Potri.001G026700.1	Potri.003G198000.1	1e-179
22-137:	Potri.001G026800.1	Potri.003G197900.1	0
22-138:	Potri.001G026900.1	Potri.003G197600.1	0
22-139:	Potri.001G027000.1	Potri.003G197500.1	5e-74
22-140:	Potri.001G027100.1	Potri.003G197400.1	0
22-141:	Potri.001G027200.1	Potri.003G196900.1	0
22-142:	Potri.001G027400.1	Potri.003G196500.1	0
22-143:	Potri.001G027600.1	Potri.003G196200.1	0
22-144:	Potri.001G027700.1	Potri.003G196100.1	5e-145
22-145:	Potri.001G027900.1	Potri.003G196000.1	0
22-146:	Potri.001G028000.1	Potri.003G195700.1	8e-132
22-147:	Potri.001G028100.1	Potri.003G195600.1	0
22-148:	Potri.001G028200.1	Potri.003G195500.1	0
22-149:	Potri.001G028300.1	Potri.003G195400.1	0
22-150:	Potri.001G028400.1	Potri.003G195300.1	0
22-151:	Potri.001G028600.1	Potri.003G195100.1	9e-45
22-152:	Potri.001G028900.1	Potri.003G195000.1	4e-21
22-153:	Potri.001G029500.1	Potri.003G194900.1	8e-109
22-154:	Potri.001G029600.1	Potri.003G194800.1	2e-83
22-155:	Potri.001G029700.1	Potri.003G194700.1	1e-72
22-156:	Potri.001G029800.1	Potri.003G194600.1	0
22-157:	Potri.001G030000.1	Potri.003G194500.1	1e-135
22-158:	Potri.001G030900.1	Potri.003G194300.1	0
22-159:	Potri.001G031700.1	Potri.003G194000.1	0
22-160:	Potri.001G031800.1	Potri.003G193800.1	0
22-161:	Potri.001G031900.1	Potri.003G193700.1	1e-156
22-162:	Potri.001G032000.1	Potri.003G193000.1	0
22-163:	Potri.001G032100.1	Potri.003G192900.1	0
22-164:	Potri.001G032200.1	Potri.003G192800.1	2e-89
22-165:	Potri.001G032300.1	Potri.003G192700.1	2e-83
22-166:	Potri.001G032400.1	Potri.003G192600.1	0
22-167:	Potri.001G032500.1	Potri.003G192500.1	0
22-168:	Potri.001G032600.1	Potri.003G192400.1	2e-143
22-169:	Potri.001G032800.1	Potri.003G192300.1	0
22-170:	Potri.001G032900.1	Potri.003G192200.1	1e-130
22-171:	Potri.001G033200.1	Potri.003G192100.1	2e-148
22-172:	Potri.001G033600.1	Potri.003G191600.1	0
22-173:	Potri.001G033700.1	Potri.003G191300.1	1e-14
22-174:	Potri.001G034000.1	Potri.003G191200.1	3e-74
22-175:	Potri.001G034200.1	Potri.003G191100.1	0
22-176:	Potri.001G034400.1	Potri.003G190800.1	1e-136
22-177:	Potri.001G034500.1	Potri.003G190700.1	7e-149
22-178:	Potri.001G035200.1	Potri.003G190400.1	1e-135
22-179:	Potri.001G035400.1	Potri.003G190200.1	4e-125
22-180:	Potri.001G035800.1	Potri.003G190000.1	0
22-181:	Potri.001G035900.1	Potri.003G189800.1	0
22-182:	Potri.001G036000.1	Potri.003G189700.1	0
22-183:	Potri.001G036100.1	Potri.003G189500.1	0
22-184:	Potri.001G036400.1	Potri.003G189400.1	0
22-185:	Potri.001G036500.1	Potri.003G188900.1	8e-109
22-186:	Potri.001G036600.1	Potri.003G188800.1	1e-134
22-187:	Potri.001G036800.1	Potri.003G188700.1	0
22-188:	Potri.001G036900.1	Potri.003G188500.1	0
22-189:	Potri.001G037000.1	Potri.003G187800.1	1e-83
22-190:	Potri.001G037200.1	Potri.003G187700.1	1e-169
22-191:	Potri.001G037300.1	Potri.003G187600.1	8e-16
22-192:	Potri.001G037400.1	Potri.003G187500.1	8e-58
22-193:	Potri.001G037500.1	Potri.003G187400.1	0
22-194:	Potri.001G037700.1	Potri.003G187300.1	0
22-195:	Potri.001G037900.1	Potri.003G186700.1	0
22-196:	Potri.001G038000.1	Potri.003G186600.1	0
22-197:	Potri.001G038100.1	Potri.003G186500.1	0
22-198:	Potri.001G038200.1	Potri.003G186400.1	1e-56
22-199:	Potri.001G038500.1	Potri.003G186300.1	1e-167
22-200:	Potri.001G039800.1	Potri.003G186100.1	9e-121
22-201:	Potri.001G040000.1	Potri.003G185800.1	0
22-202:	Potri.001G041200.1	Potri.003G185500.1	0
22-203:	Potri.001G041400.1	Potri.003G185400.1	2e-48
22-204:	Potri.001G041500.1	Potri.003G185300.1	0
22-205:	Potri.001G041600.1	Potri.003G185200.1	1e-56
22-206:	Potri.001G041700.1	Potri.003G185100.1	0
22-207:	Potri.001G041800.1	Potri.003G185000.1	0
22-208:	Potri.001G041900.1	Potri.003G184900.1	3e-132
22-209:	Potri.001G042100.1	Potri.003G184500.1	2e-29
22-210:	Potri.001G042300.1	Potri.003G184200.1	3e-25
22-211:	Potri.001G042500.1	Potri.003G184100.1	0
22-212:	Potri.001G042600.1	Potri.003G184000.1	0
22-213:	Potri.001G042900.1	Potri.003G183900.1	0
22-214:	Potri.001G043000.1	Potri.003G183800.1	0
22-215:	Potri.001G043100.1	Potri.003G183700.1	3e-110
22-216:	Potri.001G043200.1	Potri.003G183600.1	0
22-217:	Potri.001G043300.1	Potri.003G183500.1	3e-47
22-218:	Potri.001G043400.1	Potri.003G183400.1	8e-97
22-219:	Potri.001G043600.1	Potri.003G183300.1	2e-104
22-220:	Potri.001G043700.1	Potri.003G183100.1	0
22-221:	Potri.001G043900.1	Potri.003G183000.1	0
22-222:	Potri.001G044100.1	Potri.003G182500.1	0
22-223:	Potri.001G044200.1	Potri.003G182400.1	2e-97
22-224:	Potri.001G044400.1	Potri.003G182300.1	2e-91
22-225:	Potri.001G044500.1	Potri.003G182200.1	0
22-226:	Potri.001G044700.1	Potri.003G182100.1	8e-134
22-227:	Potri.001G046000.1	Potri.003G181600.1	1e-171
22-228:	Potri.001G046100.1	Potri.003G181400.1	0
22-229:	Potri.001G046500.1	Potri.003G181300.1	0
22-230:	Potri.001G046600.1	Potri.003G181200.1	1e-94
22-231:	Potri.001G046700.1	Potri.003G181100.1	0
22-232:	Potri.001G046800.1	Potri.003G180900.1	0
22-233:	Potri.001G047100.1	Potri.003G180800.1	8e-157
22-234:	Potri.001G047400.1	Potri.003G180700.1	2e-162
22-235:	Potri.001G047500.1	Potri.003G180600.1	7e-165
22-236:	Potri.001G047700.1	Potri.003G180500.1	5e-106
22-237:	Potri.001G047800.1	Potri.003G180400.1	4e-138
22-238:	Potri.001G047900.1	Potri.003G180300.1	2e-134
22-239:	Potri.001G048000.1	Potri.003G180100.1	3e-59
22-240:	Potri.001G048100.1	Potri.003G180000.1	0
22-241:	Potri.001G048200.1	Potri.003G179900.1	4e-118
22-242:	Potri.001G048300.1	Potri.003G179800.1	0
22-243:	Potri.001G048400.1	Potri.003G179600.1	5e-58
22-244:	Potri.001G048500.1	Potri.003G179500.1	0
22-245:	Potri.001G048700.1	Potri.003G178900.1	0
22-246:	Potri.001G049300.1	Potri.003G178700.1	1e-146
22-247:	Potri.001G049400.1	Potri.003G178600.1	0
22-248:	Potri.001G049700.1	Potri.003G178500.1	1e-52
22-249:	Potri.001G049800.1	Potri.003G178400.1	0
22-250:	Potri.001G050000.1	Potri.003G178200.1	0
22-251:	Potri.001G050200.1	Potri.003G177800.1	0
22-252:	Potri.001G050400.1	Potri.003G177700.1	8e-144
22-253:	Potri.001G050600.1	Potri.003G177600.1	0
22-254:	Potri.001G050700.1	Potri.003G177500.1	8e-54
22-255:	Potri.001G050800.1	Potri.003G177300.1	5e-71
22-256:	Potri.001G051300.1	Potri.003G177200.1	1e-38
22-257:	Potri.001G051400.1	Potri.003G177000.1	0
22-258:	Potri.001G051500.1	Potri.003G176700.1	0
22-259:	Potri.001G051700.1	Potri.003G176600.1	0
22-260:	Potri.001G052000.1	Potri.003G176100.1	0
22-261:	Potri.001G052200.1	Potri.003G176000.1	3e-13
22-262:	Potri.001G052300.1	Potri.003G175900.1	0
22-263:	Potri.001G052400.1	Potri.003G175800.1	1e-136
22-264:	Potri.001G052500.1	Potri.003G175700.1	0
22-265:	Potri.001G052600.1	Potri.003G175600.1	4e-53
22-266:	Potri.001G052800.1	Potri.003G175500.1	4e-18
22-267:	Potri.001G053000.1	Potri.003G175300.1	0
22-268:	Potri.001G053100.1	Potri.003G175200.1	7e-90
22-269:	Potri.001G053200.1	Potri.003G175000.1	2e-64
22-270:	Potri.001G053400.1	Potri.003G174900.1	0
22-271:	Potri.001G053500.1	Potri.003G174800.1	6e-150
22-272:	Potri.001G053600.1	Potri.003G174600.1	2e-172
22-273:	Potri.001G053900.1	Potri.003G174400.1	4e-103
22-274:	Potri.001G054000.1	Potri.003G174300.1	5e-152
22-275:	Potri.001G054400.1	Potri.003G173900.1	0
22-276:	Potri.001G054500.1	Potri.003G173800.1	1e-98
22-277:	Potri.001G054700.1	Potri.003G173700.1	0
22-278:	Potri.001G054800.1	Potri.003G173500.1	0
22-279:	Potri.001G054900.1	Potri.003G173400.1	2e-129
22-280:	Potri.001G055100.1	Potri.003G173300.1	0
22-281:	Potri.001G055200.1	Potri.003G173200.1	0
22-282:	Potri.001G055300.1	Potri.003G173100.1	8e-137
22-283:	Potri.001G055400.1	Potri.003G173000.1	1e-63
22-284:	Potri.001G055700.1	Potri.003G172700.1	8e-22
22-285:	Potri.001G055900.1	Potri.003G172600.1	0
22-286:	Potri.001G056000.1	Potri.003G172500.1	0
22-287:	Potri.001G056200.1	Potri.003G172400.1	3e-89
22-288:	Potri.001G056300.1	Potri.003G172300.1	0
22-289:	Potri.001G056400.1	Potri.003G172100.1	3e-53
22-290:	Potri.001G056500.1	Potri.003G172000.1	3e-126
22-291:	Potri.001G056600.1	Potri.003G171800.1	4e-56
22-292:	Potri.001G056700.1	Potri.003G171500.1	8e-179
22-293:	Potri.001G056800.1	Potri.003G171400.1	0
22-294:	Potri.001G057100.1	Potri.003G171300.1	0
22-295:	Potri.001G057200.1	Potri.003G171200.1	0
22-296:	Potri.001G057300.1	Potri.003G171100.1	2e-27
22-297:	Potri.001G057400.1	Potri.003G171000.1	0
22-298:	Potri.001G057500.1	Potri.003G170800.1	6e-80
22-299:	Potri.001G057700.1	Potri.003G170700.1	5e-69
22-300:	Potri.001G057800.1	Potri.003G170600.1	0
22-301:	Potri.001G057900.1	Potri.003G170500.1	3e-43
22-302:	Potri.001G058000.1	Potri.003G170400.1	3e-33
22-303:	Potri.001G058100.1	Potri.003G170300.1	2e-71
22-304:	Potri.001G058200.1	Potri.003G169700.1	2e-64
22-305:	Potri.001G058400.1	Potri.003G169600.1	7e-167
22-306:	Potri.001G058500.1	Potri.003G169500.1	3e-57
22-307:	Potri.001G058600.1	Potri.003G169400.1	0
22-308:	Potri.001G058700.1	Potri.003G169200.1	0
22-309:	Potri.001G058800.1	Potri.003G169100.1	3e-99
22-310:	Potri.001G058900.1	Potri.003G169000.1	0
22-311:	Potri.001G059000.1	Potri.003G168800.1	1e-63
22-312:	Potri.001G059100.1	Potri.003G168700.1	0
22-313:	Potri.001G059400.1	Potri.003G168500.1	4e-128
22-314:	Potri.001G059500.1	Potri.003G168400.1	4e-127
22-315:	Potri.001G059700.1	Potri.003G168300.1	0
22-316:	Potri.001G059800.1	Potri.003G168200.1	4e-112
22-317:	Potri.001G059900.1	Potri.003G168000.1	0
22-318:	Potri.001G060000.1	Potri.003G167900.1	0
22-319:	Potri.001G060100.1	Potri.003G167800.1	0
22-320:	Potri.001G060200.1	Potri.003G167700.1	3e-171
22-321:	Potri.001G060400.1	Potri.003G167400.1	3e-103
22-322:	Potri.001G060500.1	Potri.003G167100.1	5e-111
22-323:	Potri.001G060600.1	Potri.003G167000.1	1e-85
22-324:	Potri.001G060800.1	Potri.003G166900.1	0
22-325:	Potri.001G060900.1	Potri.003G166800.1	1e-160
22-326:	Potri.001G061000.1	Potri.003G166700.1	2e-65
22-327:	Potri.001G061200.1	Potri.003G166500.1	1e-170
22-328:	Potri.001G061400.1	Potri.003G166400.1	0
22-329:	Potri.001G061500.1	Potri.003G166300.1	0
22-330:	Potri.001G061600.1	Potri.003G166200.1	1e-142
22-331:	Potri.001G061700.1	Potri.003G166100.1	7e-19
22-332:	Potri.001G061800.1	Potri.003G166000.1	0
22-333:	Potri.001G061900.1	Potri.003G165900.1	1e-94
22-334:	Potri.001G062000.1	Potri.003G165800.1	2e-110
22-335:	Potri.001G062200.1	Potri.003G165200.1	3e-40
22-336:	Potri.001G062500.1	Potri.003G165000.1	5e-103
22-337:	Potri.001G062600.1	Potri.003G164900.1	0
22-338:	Potri.001G062700.1	Potri.003G164800.1	0
22-339:	Potri.001G062800.1	Potri.003G164600.1	2e-173
22-340:	Potri.001G062900.1	Potri.003G164500.1	5e-65
## Alignment 23: score=2456.0 e_value=8.1e-201 N=54 Chr01&Chr03 minus
23- 0:	Potri.001G177500.1	Potri.003G056900.1	8e-114
23- 1:	Potri.001G177700.1	Potri.003G056700.1	0
23- 2:	Potri.001G178200.1	Potri.003G056600.1	0
23- 3:	Potri.001G178900.1	Potri.003G056500.1	0
23- 4:	Potri.001G179100.1	Potri.003G056400.1	0
23- 5:	Potri.001G179200.1	Potri.003G056300.1	0
23- 6:	Potri.001G179400.1	Potri.003G056200.1	0
23- 7:	Potri.001G179500.1	Potri.003G056100.1	1e-94
23- 8:	Potri.001G179800.1	Potri.003G056000.1	1e-176
23- 9:	Potri.001G180100.1	Potri.003G055800.1	0
23- 10:	Potri.001G180200.1	Potri.003G055700.1	5e-112
23- 11:	Potri.001G180400.1	Potri.003G055300.1	3e-39
23- 12:	Potri.001G180500.1	Potri.003G055100.1	2e-58
23- 13:	Potri.001G180600.1	Potri.003G055000.1	3e-121
23- 14:	Potri.001G181100.1	Potri.003G054800.1	0
23- 15:	Potri.001G181500.1	Potri.003G054400.1	2e-58
23- 16:	Potri.001G181700.1	Potri.003G054000.1	2e-15
23- 17:	Potri.001G182000.1	Potri.003G053900.1	0
23- 18:	Potri.001G182300.1	Potri.003G053800.1	0
23- 19:	Potri.001G182400.1	Potri.003G053700.1	4e-114
23- 20:	Potri.001G182500.1	Potri.003G053600.1	7e-113
23- 21:	Potri.001G182900.1	Potri.003G053400.1	3e-153
23- 22:	Potri.001G183000.1	Potri.003G053300.1	0
23- 23:	Potri.001G183100.1	Potri.003G053200.1	0
23- 24:	Potri.001G183200.1	Potri.003G053100.1	3e-64
23- 25:	Potri.001G183300.1	Potri.003G053000.1	6e-169
23- 26:	Potri.001G183600.1	Potri.003G052900.1	0
23- 27:	Potri.001G183700.1	Potri.003G052700.1	6e-157
23- 28:	Potri.001G183800.1	Potri.003G052600.1	0
23- 29:	Potri.001G184100.1	Potri.003G052400.1	0
23- 30:	Potri.001G184700.1	Potri.003G052200.1	5e-68
23- 31:	Potri.001G185000.1	Potri.003G052100.1	0
23- 32:	Potri.001G185800.1	Potri.003G051700.1	1e-63
23- 33:	Potri.001G185900.1	Potri.003G051600.1	0
23- 34:	Potri.001G186000.1	Potri.003G051500.1	0
23- 35:	Potri.001G186100.1	Potri.003G051300.1	0
23- 36:	Potri.001G186200.1	Potri.003G051200.1	0
23- 37:	Potri.001G186600.1	Potri.003G051000.1	3e-133
23- 38:	Potri.001G186700.1	Potri.003G050900.1	2e-163
23- 39:	Potri.001G187500.1	Potri.003G050700.1	7e-116
23- 40:	Potri.001G187700.1	Potri.003G050500.1	3e-93
23- 41:	Potri.001G188000.1	Potri.003G050400.1	3e-135
23- 42:	Potri.001G188700.1	Potri.003G050200.1	2e-111
23- 43:	Potri.001G188800.1	Potri.003G050100.1	0
23- 44:	Potri.001G188900.1	Potri.003G049800.1	6e-83
23- 45:	Potri.001G189100.1	Potri.003G049700.1	0
23- 46:	Potri.001G189500.1	Potri.003G049400.1	2e-25
23- 47:	Potri.001G189700.1	Potri.003G049300.1	0
23- 48:	Potri.001G189800.1	Potri.003G049100.1	0
23- 49:	Potri.001G190000.1	Potri.003G048900.1	0
23- 50:	Potri.001G190300.1	Potri.003G048100.1	0
23- 51:	Potri.001G190500.1	Potri.003G047800.1	0
23- 52:	Potri.001G190800.1	Potri.003G047700.1	4e-59
23- 53:	Potri.001G191300.1	Potri.003G047200.1	0
## Alignment 24: score=1507.0 e_value=1.3e-108 N=33 Chr01&Chr03 minus
24- 0:	Potri.001G205100.1	Potri.003G024100.1	0
24- 1:	Potri.001G205400.1	Potri.003G024000.1	0
24- 2:	Potri.001G205500.1	Potri.003G023900.1	0
24- 3:	Potri.001G205700.1	Potri.003G023700.1	0
24- 4:	Potri.001G206000.1	Potri.003G023600.1	7e-81
24- 5:	Potri.001G206100.1	Potri.003G023500.1	0
24- 6:	Potri.001G206600.1	Potri.003G023300.1	0
24- 7:	Potri.001G206700.1	Potri.003G023000.1	0
24- 8:	Potri.001G206800.1	Potri.003G022900.1	0
24- 9:	Potri.001G206900.1	Potri.003G022800.1	1e-105
24- 10:	Potri.001G207000.1	Potri.003G022700.1	8e-145
24- 11:	Potri.001G207300.1	Potri.003G022600.1	7e-24
24- 12:	Potri.001G207600.1	Potri.003G022400.1	2e-21
24- 13:	Potri.001G207700.1	Potri.003G022100.1	0
24- 14:	Potri.001G207900.1	Potri.003G022000.1	1e-91
24- 15:	Potri.001G208200.1	Potri.003G021900.1	0
24- 16:	Potri.001G208800.1	Potri.003G021800.1	0
24- 17:	Potri.001G209000.1	Potri.003G021600.1	0
24- 18:	Potri.001G209100.1	Potri.003G021500.1	4e-123
24- 19:	Potri.001G209200.1	Potri.003G021300.1	0
24- 20:	Potri.001G209500.1	Potri.003G020800.1	0
24- 21:	Potri.001G209600.1	Potri.003G020700.1	2e-83
24- 22:	Potri.001G209700.1	Potri.003G020600.1	1e-73
24- 23:	Potri.001G209800.1	Potri.003G020500.1	0
24- 24:	Potri.001G210000.1	Potri.003G020400.1	7e-173
24- 25:	Potri.001G210100.1	Potri.003G020200.1	1e-71
24- 26:	Potri.001G210400.1	Potri.003G020100.1	4e-167
24- 27:	Potri.001G210500.1	Potri.003G019600.1	0
24- 28:	Potri.001G210800.1	Potri.003G019400.1	0
24- 29:	Potri.001G210900.1	Potri.003G019300.1	3e-132
24- 30:	Potri.001G211200.1	Potri.003G019100.1	0
24- 31:	Potri.001G211300.1	Potri.003G019000.1	0
24- 32:	Potri.001G211900.1	Potri.003G018700.1	1e-180
## Alignment 25: score=275.0 e_value=2.3e-12 N=7 Chr01&Chr04 plus
25- 0:	Potri.001G373600.1	Potri.004G051100.1	1e-16
25- 1:	Potri.001G374000.1	Potri.004G051400.1	9e-63
25- 2:	Potri.001G375300.1	Potri.004G052800.1	8e-116
25- 3:	Potri.001G375600.1	Potri.004G052900.1	6e-19
25- 4:	Potri.001G375700.1	Potri.004G053000.1	3e-100
25- 5:	Potri.001G376500.1	Potri.004G054200.1	0
25- 6:	Potri.001G377400.1	Potri.004G055400.1	7e-108
## Alignment 26: score=379.0 e_value=1.8e-19 N=10 Chr01&Chr04 minus
26- 0:	Potri.001G418000.1	Potri.004G023400.1	8e-16
26- 1:	Potri.001G418200.1	Potri.004G022800.1	4e-141
26- 2:	Potri.001G418500.1	Potri.004G021500.1	0
26- 3:	Potri.001G418700.1	Potri.004G020500.1	1e-61
26- 4:	Potri.001G419500.1	Potri.004G020400.1	5e-131
26- 5:	Potri.001G420200.1	Potri.004G019900.1	0
26- 6:	Potri.001G421100.1	Potri.004G018600.1	8e-31
26- 7:	Potri.001G421400.1	Potri.004G018400.1	5e-129
26- 8:	Potri.001G422500.1	Potri.004G017800.1	5e-137
26- 9:	Potri.001G423000.1	Potri.004G017000.1	1e-22
## Alignment 27: score=326.0 e_value=5.2e-13 N=8 Chr01&Chr05 minus
27- 0:	Potri.001G299800.1	Potri.005G142900.1	6e-14
27- 1:	Potri.001G300700.1	Potri.005G142300.1	0
27- 2:	Potri.001G301800.1	Potri.005G141900.1	9e-132
27- 3:	Potri.001G302100.1	Potri.005G141600.1	2e-168
27- 4:	Potri.001G302600.1	Potri.005G141300.1	8e-121
27- 5:	Potri.001G303900.1	Potri.005G140800.1	4e-98
27- 6:	Potri.001G304200.1	Potri.005G140300.1	6e-142
27- 7:	Potri.001G304900.1	Potri.005G139900.1	3e-51
## Alignment 28: score=467.0 e_value=2.3e-24 N=11 Chr01&Chr06 plus
28- 0:	Potri.001G246000.1	Potri.006G093200.1	7e-31
28- 1:	Potri.001G246200.1	Potri.006G093600.1	6e-114
28- 2:	Potri.001G246300.1	Potri.006G093800.1	7e-153
28- 3:	Potri.001G246400.1	Potri.006G093900.1	0
28- 4:	Potri.001G246700.1	Potri.006G094000.1	5e-51
28- 5:	Potri.001G247800.1	Potri.006G095500.1	5e-178
28- 6:	Potri.001G248400.1	Potri.006G096600.1	8e-134
28- 7:	Potri.001G248600.1	Potri.006G096800.1	0
28- 8:	Potri.001G248700.1	Potri.006G096900.1	0
28- 9:	Potri.001G248800.1	Potri.006G097300.1	1e-132
28- 10:	Potri.001G249500.1	Potri.006G097700.1	2e-19
## Alignment 29: score=360.0 e_value=4.3e-13 N=8 Chr01&Chr06 plus
29- 0:	Potri.001G166100.1	Potri.006G139300.1	0
29- 1:	Potri.001G166200.1	Potri.006G139400.1	5e-48
29- 2:	Potri.001G166300.1	Potri.006G139700.1	0
29- 3:	Potri.001G166700.1	Potri.006G140100.1	1e-58
29- 4:	Potri.001G166900.1	Potri.006G140600.1	6e-48
29- 5:	Potri.001G167400.1	Potri.006G141300.1	9e-73
29- 6:	Potri.001G167900.1	Potri.006G141400.1	0
29- 7:	Potri.001G168000.1	Potri.006G141500.1	0
## Alignment 30: score=322.0 e_value=1.8e-13 N=8 Chr01&Chr06 plus
30- 0:	Potri.001G213800.1	Potri.006G200200.1	3e-155
30- 1:	Potri.001G214800.1	Potri.006G201100.1	0
30- 2:	Potri.001G216100.1	Potri.006G202600.1	0
30- 3:	Potri.001G216300.1	Potri.006G202700.1	3e-157
30- 4:	Potri.001G216600.1	Potri.006G203000.1	0
30- 5:	Potri.001G217200.1	Potri.006G203100.1	0
30- 6:	Potri.001G217700.1	Potri.006G203500.1	0
30- 7:	Potri.001G218300.1	Potri.006G204000.1	5e-24
## Alignment 31: score=293.0 e_value=1.2e-11 N=7 Chr01&Chr06 plus
31- 0:	Potri.001G266000.1	Potri.006G053500.1	3e-47
31- 1:	Potri.001G266700.1	Potri.006G053800.1	0
31- 2:	Potri.001G267500.1	Potri.006G054200.1	2e-21
31- 3:	Potri.001G267600.1	Potri.006G054900.1	5e-45
31- 4:	Potri.001G268400.1	Potri.006G056000.1	5e-12
31- 5:	Potri.001G268800.1	Potri.006G056200.1	2e-19
31- 6:	Potri.001G269300.1	Potri.006G056500.1	5e-35
## Alignment 32: score=260.0 e_value=1.1e-08 N=6 Chr01&Chr06 plus
32- 0:	Potri.001G240900.1	Potri.006G086100.1	1e-157
32- 1:	Potri.001G241300.1	Potri.006G086300.1	5e-170
32- 2:	Potri.001G241600.1	Potri.006G086500.1	2e-167
32- 3:	Potri.001G241700.1	Potri.006G086600.1	0
32- 4:	Potri.001G242300.1	Potri.006G086900.1	3e-121
32- 5:	Potri.001G243300.1	Potri.006G087800.1	6e-105
## Alignment 33: score=409.0 e_value=4.7e-19 N=10 Chr01&Chr06 minus
33- 0:	Potri.001G186700.1	Potri.006G239700.1	6e-94
33- 1:	Potri.001G187500.1	Potri.006G238600.1	9e-58
33- 2:	Potri.001G188500.1	Potri.006G237700.1	5e-70
33- 3:	Potri.001G188700.1	Potri.006G237300.1	9e-29
33- 4:	Potri.001G188900.1	Potri.006G236700.1	1e-40
33- 5:	Potri.001G189100.1	Potri.006G236600.1	0
33- 6:	Potri.001G189700.1	Potri.006G236500.1	0
33- 7:	Potri.001G189900.1	Potri.006G236300.1	1e-72
33- 8:	Potri.001G190300.1	Potri.006G236200.1	3e-71
33- 9:	Potri.001G190800.1	Potri.006G235200.1	1e-51
## Alignment 34: score=294.0 e_value=1.4e-11 N=7 Chr01&Chr06 minus
34- 0:	Potri.001G046500.1	Potri.006G263300.1	7e-60
34- 1:	Potri.001G046700.1	Potri.006G262500.1	4e-175
34- 2:	Potri.001G047500.1	Potri.006G261700.1	2e-66
34- 3:	Potri.001G047600.1	Potri.006G261600.1	9e-39
34- 4:	Potri.001G047800.1	Potri.006G261500.1	3e-96
34- 5:	Potri.001G048200.1	Potri.006G261200.1	7e-81
34- 6:	Potri.001G048500.1	Potri.006G260100.1	2e-165
## Alignment 35: score=261.0 e_value=1.2e-08 N=6 Chr01&Chr06 minus
35- 0:	Potri.001G006200.1	Potri.006G197500.1	0
35- 1:	Potri.001G006400.1	Potri.006G197000.1	1e-59
35- 2:	Potri.001G007000.1	Potri.006G196900.1	1e-160
35- 3:	Potri.001G007800.1	Potri.006G196100.1	0
35- 4:	Potri.001G007900.1	Potri.006G196000.1	0
35- 5:	Potri.001G008500.1	Potri.006G195700.1	7e-45
## Alignment 36: score=448.0 e_value=3.3e-23 N=11 Chr01&Chr07 minus
36- 0:	Potri.001G299800.1	Potri.007G049500.1	2e-14
36- 1:	Potri.001G300200.1	Potri.007G048900.1	1e-72
36- 2:	Potri.001G300700.1	Potri.007G048800.1	0
36- 3:	Potri.001G301800.1	Potri.007G048300.1	6e-128
36- 4:	Potri.001G302000.1	Potri.007G047900.1	0
36- 5:	Potri.001G302100.1	Potri.007G047600.1	4e-169
36- 6:	Potri.001G302600.1	Potri.007G047000.1	8e-116
36- 7:	Potri.001G303900.1	Potri.007G046400.1	1e-98
36- 8:	Potri.001G304200.1	Potri.007G046100.1	4e-122
36- 9:	Potri.001G304400.1	Potri.007G045900.1	9e-57
36- 10:	Potri.001G304900.1	Potri.007G045500.1	1e-51
## Alignment 37: score=994.0 e_value=1.7e-68 N=24 Chr01&Chr08 plus
37- 0:	Potri.001G235000.1	Potri.008G050200.1	6e-65
37- 1:	Potri.001G235300.1	Potri.008G050700.1	3e-135
37- 2:	Potri.001G235700.1	Potri.008G051000.1	1e-59
37- 3:	Potri.001G235800.1	Potri.008G051200.1	4e-45
37- 4:	Potri.001G236000.1	Potri.008G051300.1	2e-81
37- 5:	Potri.001G236100.1	Potri.008G051700.1	7e-116
37- 6:	Potri.001G236500.1	Potri.008G052100.1	6e-92
37- 7:	Potri.001G236900.1	Potri.008G052600.1	6e-27
37- 8:	Potri.001G237100.1	Potri.008G052900.1	4e-161
37- 9:	Potri.001G237200.1	Potri.008G053100.1	0
37- 10:	Potri.001G238300.1	Potri.008G054400.1	1e-81
37- 11:	Potri.001G238400.1	Potri.008G055100.1	1e-85
37- 12:	Potri.001G239200.1	Potri.008G055600.1	6e-92
37- 13:	Potri.001G240000.1	Potri.008G055900.1	0
37- 14:	Potri.001G240300.1	Potri.008G056300.1	2e-156
37- 15:	Potri.001G240400.1	Potri.008G056400.1	0
37- 16:	Potri.001G240900.1	Potri.008G057100.1	5e-167
37- 17:	Potri.001G241600.1	Potri.008G057300.1	0
37- 18:	Potri.001G241800.1	Potri.008G057400.1	0
37- 19:	Potri.001G242800.1	Potri.008G057800.1	4e-18
37- 20:	Potri.001G243300.1	Potri.008G058100.1	4e-93
37- 21:	Potri.001G243400.1	Potri.008G058300.1	0
37- 22:	Potri.001G244900.1	Potri.008G059100.1	1e-128
37- 23:	Potri.001G245200.1	Potri.008G059200.1	1e-143
## Alignment 38: score=312.0 e_value=4.6e-11 N=7 Chr01&Chr08 plus
38- 0:	Potri.001G251600.1	Potri.008G068200.1	4e-28
38- 1:	Potri.001G252100.1	Potri.008G068300.1	0
38- 2:	Potri.001G252300.1	Potri.008G068400.1	0
38- 3:	Potri.001G252400.1	Potri.008G068700.1	0
38- 4:	Potri.001G252500.1	Potri.008G069100.1	0
38- 5:	Potri.001G252600.1	Potri.008G069400.1	0
38- 6:	Potri.001G252900.1	Potri.008G069600.1	0
## Alignment 39: score=11967.0 e_value=0 N=254 Chr01&Chr09 plus
39- 0:	Potri.001G263200.1	Potri.009G057900.1	0
39- 1:	Potri.001G263300.1	Potri.009G058000.1	1e-96
39- 2:	Potri.001G263400.1	Potri.009G058200.1	0
39- 3:	Potri.001G263500.1	Potri.009G058300.1	8e-140
39- 4:	Potri.001G263600.1	Potri.009G058500.1	5e-19
39- 5:	Potri.001G263700.1	Potri.009G058600.1	0
39- 6:	Potri.001G263900.1	Potri.009G058800.1	0
39- 7:	Potri.001G264000.1	Potri.009G058900.1	0
39- 8:	Potri.001G264100.1	Potri.009G059000.1	0
39- 9:	Potri.001G264400.1	Potri.009G059200.1	0
39- 10:	Potri.001G264500.1	Potri.009G059300.1	4e-141
39- 11:	Potri.001G264600.1	Potri.009G059400.1	0
39- 12:	Potri.001G264800.1	Potri.009G059500.1	0
39- 13:	Potri.001G264900.1	Potri.009G059900.1	0
39- 14:	Potri.001G265100.1	Potri.009G060000.1	0
39- 15:	Potri.001G265200.1	Potri.009G060200.1	0
39- 16:	Potri.001G265300.1	Potri.009G060300.1	3e-147
39- 17:	Potri.001G265400.1	Potri.009G060500.1	0
39- 18:	Potri.001G266000.1	Potri.009G060600.1	1e-180
39- 19:	Potri.001G266200.1	Potri.009G060700.1	8e-18
39- 20:	Potri.001G266400.1	Potri.009G060800.1	0
39- 21:	Potri.001G266700.1	Potri.009G061000.1	0
39- 22:	Potri.001G266900.1	Potri.009G061100.1	0
39- 23:	Potri.001G267200.1	Potri.009G061300.1	0
39- 24:	Potri.001G267300.1	Potri.009G061500.1	0
39- 25:	Potri.001G267400.1	Potri.009G061700.1	0
39- 26:	Potri.001G267500.1	Potri.009G061800.1	7e-38
39- 27:	Potri.001G267600.1	Potri.009G061900.1	0
39- 28:	Potri.001G267700.1	Potri.009G062100.1	2e-166
39- 29:	Potri.001G267800.1	Potri.009G062200.1	0
39- 30:	Potri.001G267900.1	Potri.009G062300.1	0
39- 31:	Potri.001G268000.1	Potri.009G062400.1	5e-88
39- 32:	Potri.001G268100.1	Potri.009G062500.1	2e-58
39- 33:	Potri.001G268200.1	Potri.009G062600.1	0
39- 34:	Potri.001G268400.1	Potri.009G062700.1	2e-29
39- 35:	Potri.001G268500.1	Potri.009G063000.1	4e-20
39- 36:	Potri.001G268800.1	Potri.009G063600.1	1e-25
39- 37:	Potri.001G269000.1	Potri.009G063700.1	4e-129
39- 38:	Potri.001G269200.1	Potri.009G063800.1	0
39- 39:	Potri.001G269400.1	Potri.009G063900.1	3e-98
39- 40:	Potri.001G269500.1	Potri.009G064000.1	2e-67
39- 41:	Potri.001G269600.1	Potri.009G064100.1	3e-81
39- 42:	Potri.001G269700.1	Potri.009G064200.1	0
39- 43:	Potri.001G269800.1	Potri.009G064300.1	0
39- 44:	Potri.001G269900.1	Potri.009G064600.1	0
39- 45:	Potri.001G270000.1	Potri.009G064700.1	0
39- 46:	Potri.001G270300.1	Potri.009G064800.1	0
39- 47:	Potri.001G270800.1	Potri.009G064900.1	0
39- 48:	Potri.001G270900.1	Potri.009G065000.1	0
39- 49:	Potri.001G271200.1	Potri.009G065300.1	0
39- 50:	Potri.001G271300.1	Potri.009G065500.1	0
39- 51:	Potri.001G271400.1	Potri.009G065600.1	0
39- 52:	Potri.001G271500.1	Potri.009G065800.1	2e-146
39- 53:	Potri.001G271600.1	Potri.009G065900.1	2e-21
39- 54:	Potri.001G271700.1	Potri.009G066100.1	0
39- 55:	Potri.001G271800.1	Potri.009G066400.1	0
39- 56:	Potri.001G271900.1	Potri.009G066500.1	0
39- 57:	Potri.001G272000.1	Potri.009G066600.1	0
39- 58:	Potri.001G272300.1	Potri.009G066800.1	0
39- 59:	Potri.001G272400.1	Potri.009G066900.1	0
39- 60:	Potri.001G272500.1	Potri.009G067000.1	5e-20
39- 61:	Potri.001G272700.1	Potri.009G067100.1	0
39- 62:	Potri.001G273000.1	Potri.009G067300.1	2e-129
39- 63:	Potri.001G273100.1	Potri.009G067400.1	0
39- 64:	Potri.001G273200.1	Potri.009G067500.1	3e-86
39- 65:	Potri.001G273300.1	Potri.009G067600.1	7e-39
39- 66:	Potri.001G273400.1	Potri.009G067700.1	0
39- 67:	Potri.001G273600.1	Potri.009G067800.1	0
39- 68:	Potri.001G273700.1	Potri.009G068000.1	3e-176
39- 69:	Potri.001G273900.1	Potri.009G068100.1	0
39- 70:	Potri.001G274000.1	Potri.009G068200.1	1e-146
39- 71:	Potri.001G274100.1	Potri.009G068600.1	4e-86
39- 72:	Potri.001G274200.1	Potri.009G068800.1	5e-50
39- 73:	Potri.001G274300.1	Potri.009G068900.1	1e-62
39- 74:	Potri.001G274400.1	Potri.009G069000.1	9e-60
39- 75:	Potri.001G274600.1	Potri.009G069100.1	0
39- 76:	Potri.001G274700.1	Potri.009G069200.1	0
39- 77:	Potri.001G274800.1	Potri.009G069300.1	3e-14
39- 78:	Potri.001G275000.1	Potri.009G069500.1	2e-40
39- 79:	Potri.001G275100.1	Potri.009G069600.1	6e-136
39- 80:	Potri.001G275200.1	Potri.009G069700.1	0
39- 81:	Potri.001G275500.1	Potri.009G069900.1	0
39- 82:	Potri.001G275600.1	Potri.009G070000.1	0
39- 83:	Potri.001G275700.1	Potri.009G070300.1	2e-164
39- 84:	Potri.001G275800.1	Potri.009G070400.1	0
39- 85:	Potri.001G275900.1	Potri.009G070600.1	2e-105
39- 86:	Potri.001G276100.1	Potri.009G070700.1	8e-94
39- 87:	Potri.001G276200.1	Potri.009G070800.1	4e-173
39- 88:	Potri.001G276400.1	Potri.009G071100.1	2e-130
39- 89:	Potri.001G276500.1	Potri.009G071200.1	2e-94
39- 90:	Potri.001G276700.1	Potri.009G071600.1	0
39- 91:	Potri.001G276800.1	Potri.009G071700.1	0
39- 92:	Potri.001G276900.1	Potri.009G071800.1	0
39- 93:	Potri.001G277100.1	Potri.009G071900.1	1e-46
39- 94:	Potri.001G277600.1	Potri.009G072200.1	2e-25
39- 95:	Potri.001G277700.1	Potri.009G072300.1	2e-77
39- 96:	Potri.001G277900.1	Potri.009G072500.1	1e-60
39- 97:	Potri.001G278300.1	Potri.009G072800.1	0
39- 98:	Potri.001G278400.1	Potri.009G072900.1	0
39- 99:	Potri.001G278500.1	Potri.009G073000.1	0
39-100:	Potri.001G278600.1	Potri.009G073200.1	0
39-101:	Potri.001G278800.1	Potri.009G073300.1	0
39-102:	Potri.001G278900.1	Potri.009G073400.1	2e-142
39-103:	Potri.001G279000.1	Potri.009G073600.1	0
39-104:	Potri.001G279100.1	Potri.009G073800.1	0
39-105:	Potri.001G279200.1	Potri.009G073900.1	3e-135
39-106:	Potri.001G279300.1	Potri.009G074100.1	0
39-107:	Potri.001G279400.1	Potri.009G074200.1	0
39-108:	Potri.001G279500.1	Potri.009G074300.1	1e-166
39-109:	Potri.001G279700.1	Potri.009G074400.1	2e-120
39-110:	Potri.001G279900.1	Potri.009G074700.1	9e-144
39-111:	Potri.001G280000.1	Potri.009G075100.1	5e-169
39-112:	Potri.001G280100.1	Potri.009G075300.1	0
39-113:	Potri.001G280200.1	Potri.009G075400.1	0
39-114:	Potri.001G280300.1	Potri.009G075500.1	1e-159
39-115:	Potri.001G280400.1	Potri.009G075600.1	2e-144
39-116:	Potri.001G280600.1	Potri.009G075700.1	0
39-117:	Potri.001G280700.1	Potri.009G075900.1	0
39-118:	Potri.001G280800.1	Potri.009G076000.1	1e-51
39-119:	Potri.001G281000.1	Potri.009G076100.1	2e-118
39-120:	Potri.001G281100.1	Potri.009G076200.1	2e-93
39-121:	Potri.001G281200.1	Potri.009G076400.1	1e-88
39-122:	Potri.001G281300.1	Potri.009G076600.1	2e-175
39-123:	Potri.001G281400.1	Potri.009G076700.1	2e-125
39-124:	Potri.001G281600.1	Potri.009G076900.1	4e-111
39-125:	Potri.001G281700.1	Potri.009G077100.1	2e-91
39-126:	Potri.001G281800.1	Potri.009G077200.1	0
39-127:	Potri.001G282300.1	Potri.009G077400.1	2e-57
39-128:	Potri.001G282400.1	Potri.009G077600.1	0
39-129:	Potri.001G282600.1	Potri.009G077800.1	0
39-130:	Potri.001G282700.1	Potri.009G077900.1	3e-48
39-131:	Potri.001G282800.1	Potri.009G078000.1	0
39-132:	Potri.001G282900.1	Potri.009G078100.1	8e-69
39-133:	Potri.001G283000.1	Potri.009G078500.1	0
39-134:	Potri.001G283100.1	Potri.009G078600.1	0
39-135:	Potri.001G283900.1	Potri.009G078700.1	4e-50
39-136:	Potri.001G284400.1	Potri.009G079000.1	5e-69
39-137:	Potri.001G284800.1	Potri.009G079400.1	3e-11
39-138:	Potri.001G285300.1	Potri.009G079600.1	0
39-139:	Potri.001G285600.1	Potri.009G079900.1	0
39-140:	Potri.001G285700.1	Potri.009G080000.1	0
39-141:	Potri.001G285800.1	Potri.009G080200.1	0
39-142:	Potri.001G286000.1	Potri.009G080300.1	1e-129
39-143:	Potri.001G286200.1	Potri.009G080400.1	4e-89
39-144:	Potri.001G286300.1	Potri.009G080500.1	0
39-145:	Potri.001G286400.1	Potri.009G080600.1	0
39-146:	Potri.001G286500.1	Potri.009G080700.1	4e-129
39-147:	Potri.001G286600.1	Potri.009G081100.1	0
39-148:	Potri.001G286900.1	Potri.009G081200.1	0
39-149:	Potri.001G287100.1	Potri.009G081300.1	0
39-150:	Potri.001G287200.1	Potri.009G081400.1	0
39-151:	Potri.001G287400.1	Potri.009G081600.1	0
39-152:	Potri.001G287800.1	Potri.009G081900.1	0
39-153:	Potri.001G287900.1	Potri.009G082200.1	6e-120
39-154:	Potri.001G288000.1	Potri.009G082300.1	0
39-155:	Potri.001G288200.1	Potri.009G082400.1	2e-176
39-156:	Potri.001G288400.1	Potri.009G083100.1	2e-74
39-157:	Potri.001G288500.1	Potri.009G083500.1	4e-44
39-158:	Potri.001G288800.1	Potri.009G083900.1	0
39-159:	Potri.001G288900.1	Potri.009G084000.1	0
39-160:	Potri.001G289000.1	Potri.009G084300.1	0
39-161:	Potri.001G289100.1	Potri.009G084400.1	0
39-162:	Potri.001G289200.1	Potri.009G084500.1	0
39-163:	Potri.001G289300.1	Potri.009G084700.1	0
39-164:	Potri.001G289400.1	Potri.009G084800.1	2e-121
39-165:	Potri.001G289500.1	Potri.009G085100.1	0
39-166:	Potri.001G289600.1	Potri.009G085200.1	9e-39
39-167:	Potri.001G289800.1	Potri.009G085400.1	0
39-168:	Potri.001G290000.1	Potri.009G085500.1	2e-172
39-169:	Potri.001G290200.1	Potri.009G085800.1	7e-36
39-170:	Potri.001G290300.1	Potri.009G085900.1	1e-93
39-171:	Potri.001G291000.1	Potri.009G086100.1	8e-65
39-172:	Potri.001G291300.1	Potri.009G086200.1	5e-47
39-173:	Potri.001G291900.1	Potri.009G086300.1	0
39-174:	Potri.001G292000.1	Potri.009G086400.1	2e-37
39-175:	Potri.001G292100.1	Potri.009G086600.1	4e-82
39-176:	Potri.001G292300.1	Potri.009G086700.1	0
39-177:	Potri.001G292500.1	Potri.009G086800.1	1e-22
39-178:	Potri.001G292700.1	Potri.009G087000.1	2e-157
39-179:	Potri.001G292800.1	Potri.009G087100.1	0
39-180:	Potri.001G292900.1	Potri.009G087200.1	7e-127
39-181:	Potri.001G293100.1	Potri.009G087400.1	2e-134
39-182:	Potri.001G293300.1	Potri.009G087500.1	0
39-183:	Potri.001G293400.1	Potri.009G088100.1	0
39-184:	Potri.001G293700.1	Potri.009G088200.1	3e-142
39-185:	Potri.001G294000.1	Potri.009G088300.1	4e-15
39-186:	Potri.001G294700.1	Potri.009G088800.1	0
39-187:	Potri.001G295100.1	Potri.009G089200.1	0
39-188:	Potri.001G295300.1	Potri.009G089300.1	2e-124
39-189:	Potri.001G295500.1	Potri.009G089400.1	7e-129
39-190:	Potri.001G295600.1	Potri.009G089500.1	0
39-191:	Potri.001G295700.1	Potri.009G089600.1	4e-122
39-192:	Potri.001G295800.1	Potri.009G089800.1	0
39-193:	Potri.001G295900.1	Potri.009G090000.1	1e-36
39-194:	Potri.001G296000.1	Potri.009G090200.1	7e-61
39-195:	Potri.001G296100.1	Potri.009G090300.1	0
39-196:	Potri.001G296200.1	Potri.009G090400.1	0
39-197:	Potri.001G296400.1	Potri.009G090600.1	1e-154
39-198:	Potri.001G296500.1	Potri.009G090700.1	5e-140
39-199:	Potri.001G296600.1	Potri.009G090800.1	6e-40
39-200:	Potri.001G296700.1	Potri.009G090900.1	0
39-201:	Potri.001G296800.1	Potri.009G091000.1	0
39-202:	Potri.001G296900.1	Potri.009G091100.1	1e-53
39-203:	Potri.001G297000.1	Potri.009G091200.1	1e-155
39-204:	Potri.001G297100.1	Potri.009G091400.1	5e-20
39-205:	Potri.001G297200.1	Potri.009G091600.1	0
39-206:	Potri.001G297300.1	Potri.009G092100.1	0
39-207:	Potri.001G297400.1	Potri.009G092200.1	2e-76
39-208:	Potri.001G297500.1	Potri.009G092400.1	0
39-209:	Potri.001G297600.1	Potri.009G092500.1	0
39-210:	Potri.001G297700.1	Potri.009G092600.1	2e-57
39-211:	Potri.001G297900.1	Potri.009G092700.1	1e-135
39-212:	Potri.001G298200.1	Potri.009G092800.1	0
39-213:	Potri.001G298300.1	Potri.009G092900.1	0
39-214:	Potri.001G298400.1	Potri.009G093000.1	0
39-215:	Potri.001G298500.1	Potri.009G093200.1	0
39-216:	Potri.001G298700.1	Potri.009G093300.1	6e-125
39-217:	Potri.001G298800.1	Potri.009G093400.1	2e-48
39-218:	Potri.001G298900.1	Potri.009G093500.1	0
39-219:	Potri.001G299000.1	Potri.009G093800.1	4e-21
39-220:	Potri.001G299200.1	Potri.009G094200.1	8e-54
39-221:	Potri.001G299300.1	Potri.009G094300.1	5e-127
39-222:	Potri.001G299400.1	Potri.009G094500.1	4e-101
39-223:	Potri.001G299700.1	Potri.009G094800.1	0
39-224:	Potri.001G299800.1	Potri.009G095600.1	1e-36
39-225:	Potri.001G300000.1	Potri.009G095800.1	1e-94
39-226:	Potri.001G300100.1	Potri.009G095900.1	5e-168
39-227:	Potri.001G300200.1	Potri.009G096000.1	8e-143
39-228:	Potri.001G300300.1	Potri.009G096100.1	1e-23
39-229:	Potri.001G300400.1	Potri.009G096200.1	6e-92
39-230:	Potri.001G300500.1	Potri.009G096300.1	2e-180
39-231:	Potri.001G300800.1	Potri.009G096400.1	8e-135
39-232:	Potri.001G300900.1	Potri.009G096600.1	0
39-233:	Potri.001G301000.1	Potri.009G096700.1	0
39-234:	Potri.001G301100.1	Potri.009G096800.1	1e-83
39-235:	Potri.001G301200.1	Potri.009G096900.1	9e-118
39-236:	Potri.001G301300.1	Potri.009G097000.1	6e-27
39-237:	Potri.001G301400.1	Potri.009G097100.1	0
39-238:	Potri.001G301500.1	Potri.009G097200.1	2e-23
39-239:	Potri.001G301800.1	Potri.009G097800.1	0
39-240:	Potri.001G301900.1	Potri.009G097900.1	4e-103
39-241:	Potri.001G302000.1	Potri.009G098000.1	0
39-242:	Potri.001G302100.1	Potri.009G098100.1	0
39-243:	Potri.001G302300.1	Potri.009G098200.1	6e-92
39-244:	Potri.001G302500.1	Potri.009G098700.1	0
39-245:	Potri.001G302600.1	Potri.009G098800.1	1e-176
39-246:	Potri.001G303900.1	Potri.009G099200.1	3e-117
39-247:	Potri.001G304000.1	Potri.009G099300.1	0
39-248:	Potri.001G304100.1	Potri.009G099400.1	0
39-249:	Potri.001G304200.1	Potri.009G099500.1	0
39-250:	Potri.001G304400.1	Potri.009G099600.1	2e-88
39-251:	Potri.001G304600.1	Potri.009G099700.1	4e-57
39-252:	Potri.001G304800.1	Potri.009G099800.1	7e-180
39-253:	Potri.001G304900.1	Potri.009G100100.1	0
## Alignment 40: score=9156.0 e_value=0 N=196 Chr01&Chr09 plus
40- 0:	Potri.001G230400.1	Potri.009G023800.1	7e-17
40- 1:	Potri.001G230500.1	Potri.009G023900.1	5e-47
40- 2:	Potri.001G230600.1	Potri.009G024000.1	0
40- 3:	Potri.001G230700.1	Potri.009G024100.1	3e-83
40- 4:	Potri.001G230800.1	Potri.009G024200.1	8e-65
40- 5:	Potri.001G230900.1	Potri.009G024300.1	8e-46
40- 6:	Potri.001G231200.1	Potri.009G024400.1	0
40- 7:	Potri.001G231300.1	Potri.009G024500.1	3e-54
40- 8:	Potri.001G231500.1	Potri.009G024600.1	0
40- 9:	Potri.001G232200.1	Potri.009G024700.1	3e-73
40- 10:	Potri.001G232300.1	Potri.009G024900.1	0
40- 11:	Potri.001G232500.1	Potri.009G025100.1	0
40- 12:	Potri.001G232700.1	Potri.009G025200.1	2e-55
40- 13:	Potri.001G233100.1	Potri.009G025300.1	0
40- 14:	Potri.001G233200.1	Potri.009G025400.1	0
40- 15:	Potri.001G233400.1	Potri.009G025700.1	0
40- 16:	Potri.001G233500.1	Potri.009G025800.1	2e-18
40- 17:	Potri.001G233700.1	Potri.009G026000.1	0
40- 18:	Potri.001G233800.1	Potri.009G026100.1	0
40- 19:	Potri.001G234000.1	Potri.009G026300.1	5e-24
40- 20:	Potri.001G234100.1	Potri.009G026500.1	0
40- 21:	Potri.001G234200.1	Potri.009G026600.1	0
40- 22:	Potri.001G234400.1	Potri.009G026700.1	5e-70
40- 23:	Potri.001G234500.1	Potri.009G026800.1	0
40- 24:	Potri.001G234600.1	Potri.009G026900.1	0
40- 25:	Potri.001G235000.1	Potri.009G027000.1	3e-69
40- 26:	Potri.001G235200.1	Potri.009G027100.1	0
40- 27:	Potri.001G235300.1	Potri.009G027200.1	1e-160
40- 28:	Potri.001G235500.1	Potri.009G027300.1	6e-147
40- 29:	Potri.001G235700.1	Potri.009G027500.1	0
40- 30:	Potri.001G235800.1	Potri.009G027700.1	2e-98
40- 31:	Potri.001G236000.1	Potri.009G027800.1	0
40- 32:	Potri.001G236100.1	Potri.009G027900.1	8e-142
40- 33:	Potri.001G236400.1	Potri.009G028100.1	1e-93
40- 34:	Potri.001G236900.1	Potri.009G028400.1	2e-54
40- 35:	Potri.001G237000.1	Potri.009G028500.1	0
40- 36:	Potri.001G237300.1	Potri.009G028600.1	0
40- 37:	Potri.001G237400.1	Potri.009G028700.1	0
40- 38:	Potri.001G237600.1	Potri.009G028800.1	2e-165
40- 39:	Potri.001G237700.1	Potri.009G029000.1	3e-36
40- 40:	Potri.001G237800.1	Potri.009G029100.1	0
40- 41:	Potri.001G237900.1	Potri.009G029200.1	9e-126
40- 42:	Potri.001G238300.1	Potri.009G029300.1	0
40- 43:	Potri.001G238400.1	Potri.009G029500.1	3e-180
40- 44:	Potri.001G238500.1	Potri.009G029600.1	0
40- 45:	Potri.001G238700.1	Potri.009G029900.1	1e-40
40- 46:	Potri.001G238800.1	Potri.009G030000.1	0
40- 47:	Potri.001G238900.1	Potri.009G030100.1	1e-125
40- 48:	Potri.001G239000.1	Potri.009G030200.1	2e-78
40- 49:	Potri.001G239100.1	Potri.009G030400.1	0
40- 50:	Potri.001G239200.1	Potri.009G030500.1	0
40- 51:	Potri.001G239300.1	Potri.009G030600.1	0
40- 52:	Potri.001G239500.1	Potri.009G030700.1	0
40- 53:	Potri.001G240100.1	Potri.009G031100.1	5e-120
40- 54:	Potri.001G240300.1	Potri.009G031200.1	1e-162
40- 55:	Potri.001G240400.1	Potri.009G031300.1	0
40- 56:	Potri.001G240500.1	Potri.009G031500.1	0
40- 57:	Potri.001G240900.1	Potri.009G031800.1	3e-154
40- 58:	Potri.001G241300.1	Potri.009G031900.1	0
40- 59:	Potri.001G241600.1	Potri.009G032000.1	0
40- 60:	Potri.001G241700.1	Potri.009G032700.1	0
40- 61:	Potri.001G242000.1	Potri.009G033100.1	0
40- 62:	Potri.001G242300.1	Potri.009G033500.1	3e-128
40- 63:	Potri.001G242400.1	Potri.009G033700.1	0
40- 64:	Potri.001G242600.1	Potri.009G033900.1	0
40- 65:	Potri.001G242800.1	Potri.009G034300.1	9e-43
40- 66:	Potri.001G242900.1	Potri.009G034400.1	5e-58
40- 67:	Potri.001G243200.1	Potri.009G034500.1	1e-143
40- 68:	Potri.001G243300.1	Potri.009G034800.1	6e-173
40- 69:	Potri.001G243400.1	Potri.009G034900.1	0
40- 70:	Potri.001G243600.1	Potri.009G035000.1	0
40- 71:	Potri.001G243900.1	Potri.009G035300.1	9e-171
40- 72:	Potri.001G244000.1	Potri.009G035400.1	0
40- 73:	Potri.001G244200.1	Potri.009G036600.1	2e-51
40- 74:	Potri.001G244300.1	Potri.009G036700.1	2e-49
40- 75:	Potri.001G244500.1	Potri.009G036900.1	2e-73
40- 76:	Potri.001G244800.1	Potri.009G037000.1	0
40- 77:	Potri.001G245000.1	Potri.009G037200.1	8e-18
40- 78:	Potri.001G245200.1	Potri.009G037300.1	0
40- 79:	Potri.001G245300.1	Potri.009G037400.1	0
40- 80:	Potri.001G245400.1	Potri.009G037500.1	4e-24
40- 81:	Potri.001G245600.1	Potri.009G037600.1	1e-94
40- 82:	Potri.001G245700.1	Potri.009G037700.1	0
40- 83:	Potri.001G246000.1	Potri.009G038700.1	1e-61
40- 84:	Potri.001G246100.1	Potri.009G039100.1	0
40- 85:	Potri.001G246200.1	Potri.009G039300.1	0
40- 86:	Potri.001G246300.1	Potri.009G039400.1	7e-46
40- 87:	Potri.001G246400.1	Potri.009G039500.1	0
40- 88:	Potri.001G246500.1	Potri.009G039600.1	2e-60
40- 89:	Potri.001G246700.1	Potri.009G039700.1	4e-110
40- 90:	Potri.001G246800.1	Potri.009G040100.1	8e-88
40- 91:	Potri.001G246900.1	Potri.009G040200.1	0
40- 92:	Potri.001G247100.1	Potri.009G040500.1	0
40- 93:	Potri.001G247400.1	Potri.009G040600.1	0
40- 94:	Potri.001G247500.1	Potri.009G040700.1	2e-64
40- 95:	Potri.001G247600.1	Potri.009G040800.1	0
40- 96:	Potri.001G247700.1	Potri.009G040900.1	0
40- 97:	Potri.001G248000.1	Potri.009G041000.1	2e-63
40- 98:	Potri.001G248100.1	Potri.009G041700.1	2e-106
40- 99:	Potri.001G248200.1	Potri.009G042000.1	4e-120
40-100:	Potri.001G248300.1	Potri.009G042100.1	1e-22
40-101:	Potri.001G248400.1	Potri.009G042200.1	0
40-102:	Potri.001G248500.1	Potri.009G042300.1	8e-107
40-103:	Potri.001G248600.1	Potri.009G042400.1	0
40-104:	Potri.001G248700.1	Potri.009G042500.1	0
40-105:	Potri.001G248800.1	Potri.009G042600.1	0
40-106:	Potri.001G248900.1	Potri.009G042900.1	0
40-107:	Potri.001G249000.1	Potri.009G043000.1	0
40-108:	Potri.001G249100.1	Potri.009G043100.1	0
40-109:	Potri.001G249200.1	Potri.009G043200.1	0
40-110:	Potri.001G249300.1	Potri.009G043300.1	4e-167
40-111:	Potri.001G249400.1	Potri.009G043400.1	3e-33
40-112:	Potri.001G249500.1	Potri.009G043500.1	1e-44
40-113:	Potri.001G249600.1	Potri.009G043600.1	1e-42
40-114:	Potri.001G249700.1	Potri.009G043700.1	0
40-115:	Potri.001G249800.1	Potri.009G043800.1	0
40-116:	Potri.001G249900.1	Potri.009G043900.1	0
40-117:	Potri.001G250000.1	Potri.009G044100.1	0
40-118:	Potri.001G250100.1	Potri.009G044200.1	0
40-119:	Potri.001G250300.1	Potri.009G044300.1	3e-79
40-120:	Potri.001G250400.1	Potri.009G044500.1	2e-99
40-121:	Potri.001G250500.1	Potri.009G045100.1	0
40-122:	Potri.001G250600.1	Potri.009G045200.1	2e-120
40-123:	Potri.001G250700.1	Potri.009G045300.1	0
40-124:	Potri.001G250800.1	Potri.009G045400.1	2e-161
40-125:	Potri.001G250900.1	Potri.009G045500.1	0
40-126:	Potri.001G251100.1	Potri.009G045600.1	4e-54
40-127:	Potri.001G251200.1	Potri.009G045800.1	0
40-128:	Potri.001G251400.1	Potri.009G045900.1	7e-86
40-129:	Potri.001G251500.1	Potri.009G046200.1	0
40-130:	Potri.001G251600.1	Potri.009G046400.1	3e-45
40-131:	Potri.001G251700.1	Potri.009G046500.1	3e-141
40-132:	Potri.001G252100.1	Potri.009G046600.1	0
40-133:	Potri.001G252500.1	Potri.009G046700.1	0
40-134:	Potri.001G252600.1	Potri.009G046800.1	0
40-135:	Potri.001G252800.1	Potri.009G046900.1	2e-68
40-136:	Potri.001G253000.1	Potri.009G047000.1	1e-115
40-137:	Potri.001G253100.1	Potri.009G047400.1	0
40-138:	Potri.001G253200.1	Potri.009G047500.1	0
40-139:	Potri.001G253300.1	Potri.009G047700.1	0
40-140:	Potri.001G253400.1	Potri.009G047800.1	0
40-141:	Potri.001G253500.1	Potri.009G047900.1	2e-179
40-142:	Potri.001G253700.1	Potri.009G048000.1	0
40-143:	Potri.001G253800.1	Potri.009G048200.1	0
40-144:	Potri.001G254000.1	Potri.009G048600.1	6e-59
40-145:	Potri.001G254300.1	Potri.009G049100.1	0
40-146:	Potri.001G254400.1	Potri.009G049400.1	4e-115
40-147:	Potri.001G254500.1	Potri.009G049600.1	2e-125
40-148:	Potri.001G254600.1	Potri.009G049700.1	0
40-149:	Potri.001G254700.1	Potri.009G049800.1	1e-76
40-150:	Potri.001G254800.1	Potri.009G050000.1	0
40-151:	Potri.001G255000.1	Potri.009G050200.1	0
40-152:	Potri.001G255100.1	Potri.009G050300.1	0
40-153:	Potri.001G255300.1	Potri.009G050500.1	4e-35
40-154:	Potri.001G255400.1	Potri.009G050600.1	0
40-155:	Potri.001G255600.1	Potri.009G051000.1	1e-138
40-156:	Potri.001G255700.1	Potri.009G051100.1	0
40-157:	Potri.001G255800.1	Potri.009G051200.1	0
40-158:	Potri.001G256000.1	Potri.009G051400.1	0
40-159:	Potri.001G256100.1	Potri.009G051500.1	0
40-160:	Potri.001G256200.1	Potri.009G051600.1	0
40-161:	Potri.001G256300.1	Potri.009G051800.1	0
40-162:	Potri.001G256400.1	Potri.009G052000.1	0
40-163:	Potri.001G256600.1	Potri.009G052200.1	1e-149
40-164:	Potri.001G256700.1	Potri.009G052400.1	0
40-165:	Potri.001G256900.1	Potri.009G052500.1	3e-61
40-166:	Potri.001G257000.1	Potri.009G052600.1	0
40-167:	Potri.001G257100.1	Potri.009G052700.1	0
40-168:	Potri.001G257500.1	Potri.009G052800.1	0
40-169:	Potri.001G257600.1	Potri.009G052900.1	0
40-170:	Potri.001G257700.1	Potri.009G053000.1	2e-55
40-171:	Potri.001G258000.1	Potri.009G053200.1	2e-172
40-172:	Potri.001G258100.1	Potri.009G053300.1	3e-134
40-173:	Potri.001G258300.1	Potri.009G053400.1	7e-103
40-174:	Potri.001G258400.1	Potri.009G053500.1	0
40-175:	Potri.001G258500.1	Potri.009G053600.1	4e-131
40-176:	Potri.001G258600.1	Potri.009G053800.1	0
40-177:	Potri.001G258700.1	Potri.009G053900.1	0
40-178:	Potri.001G258900.1	Potri.009G054000.1	0
40-179:	Potri.001G259000.1	Potri.009G054100.1	3e-53
40-180:	Potri.001G259200.1	Potri.009G054500.1	3e-120
40-181:	Potri.001G259300.1	Potri.009G054700.1	3e-125
40-182:	Potri.001G259800.1	Potri.009G054800.1	2e-61
40-183:	Potri.001G260100.1	Potri.009G054900.1	2e-51
40-184:	Potri.001G260800.1	Potri.009G055200.1	0
40-185:	Potri.001G260900.1	Potri.009G055400.1	0
40-186:	Potri.001G261000.1	Potri.009G055600.1	6e-163
40-187:	Potri.001G261100.1	Potri.009G055900.1	0
40-188:	Potri.001G261300.1	Potri.009G056100.1	3e-66
40-189:	Potri.001G261500.1	Potri.009G056200.1	5e-122
40-190:	Potri.001G261700.1	Potri.009G056400.1	1e-152
40-191:	Potri.001G261800.1	Potri.009G056600.1	2e-111
40-192:	Potri.001G261900.1	Potri.009G056700.1	0
40-193:	Potri.001G262000.1	Potri.009G056800.1	6e-51
40-194:	Potri.001G262100.1	Potri.009G056900.1	1e-133
40-195:	Potri.001G262400.1	Potri.009G057100.1	3e-157
## Alignment 41: score=509.0 e_value=4.9e-27 N=12 Chr01&Chr09 plus
41- 0:	Potri.001G224100.1	Potri.009G020800.1	0
41- 1:	Potri.001G225100.1	Potri.009G021800.1	0
41- 2:	Potri.001G225200.1	Potri.009G021900.1	0
41- 3:	Potri.001G225400.1	Potri.009G022000.1	2e-58
41- 4:	Potri.001G225800.1	Potri.009G022300.1	6e-59
41- 5:	Potri.001G227100.1	Potri.009G022400.1	1e-37
41- 6:	Potri.001G228100.1	Potri.009G022600.1	1e-14
41- 7:	Potri.001G228700.1	Potri.009G022800.1	5e-82
41- 8:	Potri.001G229000.1	Potri.009G022900.1	0
41- 9:	Potri.001G229300.1	Potri.009G023100.1	0
41- 10:	Potri.001G229600.1	Potri.009G023300.1	0
41- 11:	Potri.001G229700.1	Potri.009G023600.1	0
## Alignment 42: score=391.0 e_value=3.4e-21 N=9 Chr01&Chr09 plus
42- 0:	Potri.001G215000.1	Potri.009G015600.1	0
42- 1:	Potri.001G215100.1	Potri.009G015700.1	2e-154
42- 2:	Potri.001G215200.1	Potri.009G015800.1	0
42- 3:	Potri.001G216000.1	Potri.009G016600.1	0
42- 4:	Potri.001G216600.1	Potri.009G017400.1	0
42- 5:	Potri.001G216800.1	Potri.009G017600.1	1e-16
42- 6:	Potri.001G216900.1	Potri.009G017700.1	0
42- 7:	Potri.001G217200.1	Potri.009G017800.1	0
42- 8:	Potri.001G218800.1	Potri.009G019200.1	3e-143
## Alignment 43: score=499.0 e_value=8.2e-25 N=11 Chr01&Chr09 minus
43- 0:	Potri.001G212300.1	Potri.009G003400.1	5e-54
43- 1:	Potri.001G212400.1	Potri.009G003200.1	5e-133
43- 2:	Potri.001G212600.1	Potri.009G002900.1	0
43- 3:	Potri.001G212700.1	Potri.009G002400.1	0
43- 4:	Potri.001G212800.1	Potri.009G002300.1	1e-102
43- 5:	Potri.001G212900.1	Potri.009G002200.1	0
43- 6:	Potri.001G213600.1	Potri.009G001700.1	0
43- 7:	Potri.001G213700.1	Potri.009G001500.1	0
43- 8:	Potri.001G213800.1	Potri.009G001200.1	1e-26
43- 9:	Potri.001G213900.1	Potri.009G000900.1	1e-65
43- 10:	Potri.001G214700.1	Potri.009G000100.1	1e-72
## Alignment 44: score=383.0 e_value=3.1e-16 N=8 Chr01&Chr09 minus
44- 0:	Potri.001G215400.1	Potri.009G017300.1	0
44- 1:	Potri.001G215500.1	Potri.009G017100.1	0
44- 2:	Potri.001G215700.1	Potri.009G016900.1	0
44- 3:	Potri.001G215800.1	Potri.009G016700.1	3e-163
44- 4:	Potri.001G216100.1	Potri.009G016200.1	0
44- 5:	Potri.001G216300.1	Potri.009G016100.1	0
44- 6:	Potri.001G216400.1	Potri.009G016000.1	0
44- 7:	Potri.001G216500.1	Potri.009G015900.1	1e-26
## Alignment 45: score=310.0 e_value=1.4e-10 N=7 Chr01&Chr09 minus
45- 0:	Potri.001G217900.1	Potri.009G020500.1	2e-103
45- 1:	Potri.001G218100.1	Potri.009G020100.1	0
45- 2:	Potri.001G218300.1	Potri.009G019800.1	5e-129
45- 3:	Potri.001G218700.1	Potri.009G019400.1	3e-92
45- 4:	Potri.001G219200.1	Potri.009G018900.1	4e-161
45- 5:	Potri.001G219500.1	Potri.009G018800.1	7e-104
45- 6:	Potri.001G220100.1	Potri.009G018100.1	0
## Alignment 46: score=915.0 e_value=5.9e-62 N=22 Chr01&Chr10 minus
46- 0:	Potri.001G235000.1	Potri.010G210300.1	7e-65
46- 1:	Potri.001G235300.1	Potri.010G209900.1	2e-144
46- 2:	Potri.001G235700.1	Potri.010G209600.1	2e-50
46- 3:	Potri.001G235800.1	Potri.010G209400.1	4e-51
46- 4:	Potri.001G236000.1	Potri.010G209300.1	1e-78
46- 5:	Potri.001G236100.1	Potri.010G208900.1	1e-143
46- 6:	Potri.001G236500.1	Potri.010G208500.1	1e-92
[truncated: 11,971 more rows]
