# Supplementary material for: Structure and expression analysis of seven salt-related ERF genes of Populus
Source: PeerJ. 2020 Oct 20;8:e10206. doi: 10.7717/peerj.10206 (PMC7583627; doi:10.7717/peerj.10206)
Supplement: Supplemental Information 5 [file peerj-08-10206-s005.xlsx]

## Sheet: Table S5
############### Parameters ###############
# MATCH_SCORE: 50
# MATCH_SIZE: 5
# GAP_PENALTY: -1
# OVERLAP_WINDOW: 5
# E_VALUE: 1e-05
# MAX GAPS: 25
############### Statistics ###############
# Number of collinear genes: 83, Percentage: 39.71
# Number of all genes: 209
##########################################
## Alignment 0: score=330.0 e_value=6e-17 N=7 Chr01&Chr03 plus
0- 0:	Potri.001G069300.1	Potri.003G077700.1	3e-50
0- 1:	Potri.001G079600.1	Potri.003G080600.1	2e-41
0- 2:	Potri.001G079900.1	Potri.003G081200.1	4e-75
0- 3:	Potri.001G110500.1	Potri.003G121200.1	9e-102
0- 4:	Potri.001G154200.1	Potri.003G150800.1	3e-49
0- 5:	Potri.001G157100.1	Potri.003G161000.1	4e-58
0- 6:	Potri.001G453100.1	Potri.003G220200.1	4e-26
## Alignment 1: score=731.0 e_value=3e-41 N=15 Chr01&Chr03 minus
1- 0:	Potri.001G004700.1	Potri.003G220200.1	2e-146
1- 1:	Potri.001G048200.1	Potri.003G179900.1	4e-118
1- 2:	Potri.001G067600.1	Potri.003G162500.1	7e-118
1- 3:	Potri.001G069300.1	Potri.003G161000.1	6e-168
1- 4:	Potri.001G079600.1	Potri.003G150800.1	1e-45
1- 5:	Potri.001G092400.1	Potri.003G139300.1	1e-170
1- 6:	Potri.001G094800.1	Potri.003G136300.1	0
1- 7:	Potri.001G110500.1	Potri.003G121200.1	9e-102
1- 8:	Potri.001G154100.1	Potri.003G081200.1	1e-157
1- 9:	Potri.001G154200.1	Potri.003G080600.1	3e-132
1- 10:	Potri.001G155700.1	Potri.003G079300.1	7e-128
1- 11:	Potri.001G157100.1	Potri.003G077700.1	7e-98
1- 12:	Potri.001G163700.1	Potri.003G071700.1	0
1- 13:	Potri.001G181500.1	Potri.003G054400.1	2e-58
1- 14:	Potri.001G187500.1	Potri.003G050700.1	7e-116
## Alignment 2: score=293.0 e_value=4.6e-13 N=6 Chr02&Chr05 minus
2- 0:	Potri.002G029400.1	Potri.005G233300.1	7e-135
2- 1:	Potri.002G039000.1	Potri.005G223200.1	4e-48
2- 2:	Potri.002G039200.1	Potri.005G223100.1	6e-79
2- 3:	Potri.002G043300.1	Potri.005G219600.1	2e-86
2- 4:	Potri.002G085600.1	Potri.005G176000.1	2e-102
2- 5:	Potri.002G124000.1	Potri.005G140900.1	7e-52
## Alignment 3: score=291.0 e_value=3.7e-08 N=6 Chr02&Chr14 plus
3- 0:	Potri.002G124000.1	Potri.014G025200.1	1e-89
3- 1:	Potri.002G141200.1	Potri.014G055700.1	2e-126
3- 2:	Potri.002G153500.1	Potri.014G076700.1	7e-48
3- 3:	Potri.002G167400.1	Potri.014G094500.1	7e-152
3- 4:	Potri.002G172200.1	Potri.014G099900.1	6e-98
3- 5:	Potri.002G201600.1	Potri.014G126100.1	2e-162
## Alignment 4: score=392.0 e_value=1.1e-17 N=8 Chr08&Chr10 minus
4- 0:	Potri.008G071100.1	Potri.010G186400.1	1e-153
4- 1:	Potri.008G073600.1	Potri.010G183700.1	4e-142
4- 2:	Potri.008G091300.1	Potri.010G163900.1	7e-48
4- 3:	Potri.008G120100.1	Potri.010G125600.1	0
4- 4:	Potri.008G166000.1	Potri.010G072400.1	2e-41
4- 5:	Potri.008G166200.1	Potri.010G072300.1	4e-124
4- 6:	Potri.008G186300.1	Potri.010G046600.1	0
4- 7:	Potri.008G210900.1	Potri.010G006800.1	5e-104
## Alignment 5: score=297.0 e_value=3.7e-09 N=6 Chr13&Chr19 plus
5- 0:	Potri.013G045200.1	Potri.019G015500.1	2e-122
5- 1:	Potri.013G056700.1	Potri.019G036100.1	5e-142
5- 2:	Potri.013G100300.1	Potri.019G073300.1	2e-88
5- 3:	Potri.013G101200.1	Potri.019G075600.1	7e-108
5- 4:	Potri.013G135600.1	Potri.019G102200.1	0
5- 5:	Potri.013G158500.1	Potri.019G131300.1	1e-160
