# Supplementary material for: Structure and expression analysis of seven salt-related ERF genes of Populus
Source: PeerJ. 2020 Oct 20;8:e10206. doi: 10.7717/peerj.10206 (PMC7583627; doi:10.7717/peerj.10206)
Supplement: Supplemental Information 6 [file peerj-08-10206-s006.xlsx]

## Sheet: Table S6
Potri.001G079600.1,Potri.001G079800.1
Potri.001G110700.1,Potri.001G110800.1
Potri.002G039000.1,Potri.002G039100.1
Potri.002G039200.1,Potri.002G039300.1
Potri.002G172200.1,Potri.002G172300.1
Potri.002G172300.1,Potri.002G172600.1
Potri.003G054100.1,Potri.003G054400.1
Potri.003G150800.1,Potri.003G151000.1
Potri.004G047500.1,Potri.004G047600.1
Potri.004G051700.1,Potri.004G051800.1
Potri.005G223200.1,Potri.005G223300.1
Potri.006G138700.1,Potri.006G138800.1
Potri.006G138800.1,Potri.006G138900.1
Potri.006G156600.1,Potri.006G163400.1
Potri.010G072400.1,Potri.010G072600.1
Potri.012G134000.1,Potri.012G134100.1
Potri.013G101100.1,Potri.013G101200.1
Potri.014G046600.1,Potri.014G046700.1
Potri.014G046700.1,Potri.014G046800.1
Potri.014G046800.1,Potri.014G046900.1
Potri.016G053200.1,Potri.016G126100.1
Potri.019G075500.1,Potri.019G075600.1
