# Supplementary material for: Structure and expression analysis of seven salt-related ERF genes of Populus
Source: PeerJ. 2020 Oct 20;8:e10206. doi: 10.7717/peerj.10206 (PMC7583627; doi:10.7717/peerj.10206)
Supplement: Supplemental Information 8 [file peerj-08-10206-s008.xlsx]

## Sheet: GO enrichment
Number	GO ID	Term Type	Description	Ratio_in_study	Ratio_in_pop	Pvalue_uncorrected	Pvalue_corrected
7	GO:0005634	CC	nucleus	7/7	3515/27817	5.11725e-07	0.000968824
7	GO:0043231	CC	intracellular membrane-bounded organelle	7/7	5724/27817	1.55761e-05	0.0196597
7	GO:0043227	CC	membrane-bounded organelle	7/7	5879/27817	1.87814e-05	0.0203188
7	GO:0043229	CC	intracellular organelle	7/7	6560/27817	4.04662e-05	0.0344519
7	GO:0043226	CC	organelle	7/7	6571/27817	4.09438e-05	0.0344519
7	GO:0044424	CC	intracellular part	7/7	10294/27817	0.000949202	0.599026
7	GO:0044464	CC	cell part	7/7	11803/27817	0.0024736	1
7	GO:0003700	MF	DNA-binding transcription factor activity	7/7	1034/27817	9.61525e-11	7.09056e-07
7	GO:0140110	MF	transcription regulator activity	7/7	1137/27817	1.87259e-10	7.09056e-07
7	GO:0003677	MF	DNA binding	7/7	2582/27817	5.8927e-08	0.000148751
7	GO:0003676	MF	nucleic acid binding	7/7	4648/27817	3.62289e-06	0.00548723
7	GO:1901363	MF	heterocyclic compound binding	7/7	9676/27817	0.000615296	0.424831
7	GO:0097159	MF	organic cyclic compound binding	7/7	9680/27817	0.000617079	0.424831
7	GO:0005488	MF	binding	7/7	13690/27817	0.00698737	1
