# Supplementary material for: Structure and expression analysis of seven salt-related ERF genes of Populus
Source: PeerJ. 2020 Oct 20;8:e10206. doi: 10.7717/peerj.10206 (PMC7583627; doi:10.7717/peerj.10206)
Supplement: Supplemental Information 9 [file peerj-08-10206-s009.xlsx]

## Sheet: Root
PtERF002	MeanDiff	SEM	t Value	Prob	Alpha	Sig	LCL	UCL
12h 2h	-0.30758	0.93111	-0.33033	0.74963	0.05	0	-2.45472	1.83957
24h 2h	-0.34225	0.93111	-0.36757	0.72273	0.05	0	-2.48939	1.8049
24h 12h	-0.03467	0.93111	-0.03724	0.97121	0.05	0	-2.18181	2.11247
48h 2h	-0.07969	0.93111	-0.08558	0.9339	0.05	0	-2.22683	2.06746
48h 12h	0.22789	0.93111	0.24475	0.81281	0.05	0	-1.91925	2.37503
48h 24h	0.26256	0.93111	0.28199	0.78511	0.05	0	-1.88458	2.4097
PtERF007	MeanDiff	SEM	t Value	Prob	Alpha	Sig	LCL	UCL
12h 2h	-1.46368	0.47782	-3.06323	0.01551	0.05	1	-2.56554	-0.36182
24h 2h	-1.24862	0.47782	-2.61313	0.03098	0.05	1	-2.35048	-0.14675
24h 12h	0.21507	0.47782	0.4501	0.66459	0.05	0	-0.8868	1.31693
48h 2h	-0.6636	0.47782	-1.38879	0.20233	0.05	0	-1.76546	0.43826
48h 12h	0.80008	0.47782	1.67444	0.13258	0.05	0	-0.30178	1.90195
48h 24h	0.58502	0.47782	1.22434	0.25565	0.05	0	-0.51684	1.68688
PtERF001	MeanDiff	SEM	t Value	Prob	Alpha	Sig	LCL	UCL
12h 2h	-0.65956	0.82645	-0.79806	0.44787	0.05	0	-2.56535	1.24623
24h 2h	-0.56557	0.82645	-0.68434	0.51309	0.05	0	-2.47136	1.34022
24h 12h	0.09398	0.82645	0.11372	0.91226	0.05	0	-1.81181	1.99977
48h 2h	0.55932	0.82645	0.67678	0.51763	0.05	0	-1.34646	2.46511
48h 12h	1.21888	0.82645	1.47484	0.17849	0.05	0	-0.68691	3.12467
48h 24h	1.1249	0.82645	1.36112	0.21057	0.05	0	-0.78089	3.03069
PtERF006	MeanDiff	SEM	t Value	Prob	Alpha	Sig	LCL	UCL
12h 2h	-0.00769	0.03281	-0.23439	0.82057	0.05	0	-0.08336	0.06798
24h 2h	-0.04841	0.03281	-1.47517	0.1784	0.05	0	-0.12408	0.02726
24h 12h	-0.04072	0.03281	-1.24078	0.24984	0.05	0	-0.11638	0.03495
48h 2h	0.05604	0.03281	1.70769	0.12608	0.05	0	-0.01963	0.13171
48h 12h	0.06373	0.03281	1.94208	0.08806	0.05	0	-0.01194	0.1394
48h 24h	0.10444	0.03281	3.18286	0.01294	0.05	1	0.02877	0.18011
PtERF003	MeanDiff	SEM	t Value	Prob	Alpha	Sig	LCL	UCL
12h 2h	-0.0224	0.32922	-0.06804	0.94742	0.05	0	-0.78159	0.73679
24h 2h	-0.09329	0.32922	-0.28337	0.78409	0.05	0	-0.85248	0.6659
24h 12h	-0.07089	0.32922	-0.21533	0.8349	0.05	0	-0.83008	0.6883
48h 2h	0.67892	0.32922	2.0622	0.07311	0.05	0	-0.08027	1.43811
48h 12h	0.70132	0.32922	2.13024	0.06577	0.05	0	-0.05787	1.46051
48h 24h	0.77221	0.32922	2.34557	0.04701	0.05	1	0.01303	1.5314
PtERF004	MeanDiff	SEM	t Value	Prob	Alpha	Sig	LCL	UCL
12h 2h	0.01143	0.19819	0.05766	0.95543	0.05	0	-0.44561	0.46846
24h 2h	-0.07457	0.19819	-0.37626	0.7165	0.05	0	-0.53161	0.38246
24h 12h	-0.086	0.19819	-0.43393	0.67581	0.05	0	-0.54303	0.37103
48h 2h	0.40004	0.19819	2.01841	0.07825	0.05	0	-0.057	0.85707
48h 12h	0.38861	0.19819	1.96075	0.08556	0.05	0	-0.06843	0.84564
48h 24h	0.47461	0.19819	2.39468	0.04354	0.05	1	0.01757	0.93164
PtERF005	MeanDiff	SEM	t Value	Prob	Alpha	Sig	LCL	UCL
12h 2h	1836.01	2781.49	0.66008	0.52774	0.05	0	-4578.1	8250.13
24h 2h	442.025	2781.49	0.15892	0.87767	0.05	0	-5972.09	6856.14
24h 12h	-1393.99	2781.49	-0.50117	0.62975	0.05	0	-7808.1	5020.13
48h 2h	7187.16	2781.49	2.58393	0.03242	0.05	1	773.043	13601.3
48h 12h	5351.15	2781.49	1.92384	0.09058	0.05	0	-1062.97	11765.3
48h 24h	6745.13	2781.49	2.42501	0.04152	0.05	1	331.018	13159.3

## Sheet: Stem
PtERF002	MeanDiff	SEM	t Value	Prob	Alpha	Sig	LCL	UCL
12h 2h	-0.2378	0.75576	-0.31466	0.76107	0.05	0	-1.98058	1.50497
24h 2h	0.8816	0.75576	1.16651	0.277	0.05	0	-0.86118	2.62438
24h 12h	1.1194	0.75576	1.48117	0.17684	0.05	0	-0.62337	2.86218
48h 2h	0.03997	0.75576	0.05289	0.95912	0.05	0	-1.7028	1.78275
48h 12h	0.27778	0.75576	0.36755	0.72274	0.05	0	-1.465	2.02055
48h 24h	-0.84163	0.75576	-1.11362	0.29778	0.05	0	-2.5844	0.90115
PtERF007	MeanDiff	SEM	t Value	Prob	Alpha	Sig	LCL	UCL
12h 2h	-0.54002	0.71999	-0.75004	0.47471	0.05	0	-2.20031	1.12027
24h 2h	-0.3942	0.71999	-0.54751	0.59897	0.05	0	-2.05449	1.26609
24h 12h	0.14582	0.71999	0.20253	0.84456	0.05	0	-1.51447	1.80611
48h 2h	-0.33047	0.71999	-0.459	0.65845	0.05	0	-1.99076	1.32982
48h 12h	0.20955	0.71999	0.29105	0.77842	0.05	0	-1.45074	1.86984
48h 24h	0.06373	0.71999	0.08852	0.93164	0.05	0	-1.59656	1.72402
PtERF001	MeanDiff	SEM	t Value	Prob	Alpha	Sig	LCL	UCL
12h 2h	-0.36486	0.51021	-0.71512	0.49487	0.05	0	-1.54141	0.81169
24h 2h	-0.10784	0.51021	-0.21136	0.83789	0.05	0	-1.28439	1.06871
24h 12h	0.25702	0.51021	0.50375	0.62801	0.05	0	-0.91953	1.43357
48h 2h	-0.32664	0.51021	-0.64021	0.53993	0.05	0	-1.50319	0.8499
48h 12h	0.03822	0.51021	0.0749	0.94213	0.05	0	-1.13833	1.21476
48h 24h	-0.2188	0.51021	-0.42885	0.67935	0.05	0	-1.39535	0.95774
PtERF006	MeanDiff	SEM	t Value	Prob	Alpha	Sig	LCL	UCL
12h 2h	-2.38619	0.94658	-2.52084	0.03576	0.05	1	-4.56901	-0.20336
24h 2h	-0.61543	0.94658	-0.65016	0.53381	0.05	0	-2.79826	1.56739
24h 12h	1.77075	0.94658	1.87068	0.0983	0.05	0	-0.41207	3.95358
48h 2h	-2.27249	0.94658	-2.40073	0.04313	0.05	1	-4.45532	-0.08967
48h 12h	0.1137	0.94658	0.12011	0.90736	0.05	0	-2.06913	2.29652
48h 24h	-1.65706	0.94658	-1.75057	0.11813	0.05	0	-3.83988	0.52577
PtERF003	MeanDiff	SEM	t Value	Prob	Alpha	Sig	LCL	UCL
12h 2h	-13.4922	5.2373	-2.57617	0.03281	0.05	1	-25.5694	-1.41492
24h 2h	-6.7995	5.2373	-1.29828	0.23036	0.05	0	-18.8767	5.27773
24h 12h	6.69265	5.2373	1.27788	0.23712	0.05	0	-5.38458	18.7699
48h 2h	-10.745	5.2373	-2.05163	0.07432	0.05	0	-22.8222	1.33225
48h 12h	2.74717	5.2373	0.52454	0.61412	0.05	0	-9.33006	14.8244
48h 24h	-3.94548	5.2373	-0.75334	0.47283	0.05	0	-16.0227	8.13175
PtERF004	MeanDiff	SEM	t Value	Prob	Alpha	Sig	LCL	UCL
12h 2h	-0.63906	0.41909	-1.52487	0.1658	0.05	0	-1.60549	0.32737
24h 2h	-0.73689	0.41909	-1.75829	0.11675	0.05	0	-1.70331	0.22954
24h 12h	-0.09782	0.41909	-0.23341	0.8213	0.05	0	-1.06425	0.86861
48h 2h	0.01446	0.41909	0.0345	0.97332	0.05	0	-0.95197	0.98089
48h 12h	0.65352	0.41909	1.55938	0.15753	0.05	0	-0.31291	1.61995
48h 24h	0.75135	0.41909	1.79279	0.11077	0.05	0	-0.21508	1.71777
PtERF005	MeanDiff	SEM	t Value	Prob	Alpha	Sig	LCL	UCL
12h 2h	629.695	2762.02	0.22798	0.82538	0.05	0	-5739.54	6998.93
24h 2h	1997.71	2762.02	0.72328	0.49011	0.05	0	-4371.52	8366.94
24h 12h	1368.02	2762.02	0.49529	0.63371	0.05	0	-5001.22	7737.25
48h 2h	5057.92	2762.02	1.83124	0.10444	0.05	0	-1311.31	11427.2
48h 12h	4428.23	2762.02	1.60325	0.14755	0.05	0	-1941.01	10797.5
48h 24h	3060.21	2762.02	1.10796	0.30007	0.05	0	-3309.02	9429.44

## Sheet: Leaf
PtERF002	MeanDiff	SEM	t Value	Prob	Alpha	Sig	LCL	UCL
12h 2h	-0.76481	2.04527	-0.37394	0.71816	0.05	0	-5.48121	3.95159
24h 2h	2.30814	2.04527	1.12853	0.2918	0.05	0	-2.40826	7.02454
24h 12h	3.07295	2.04527	1.50247	0.17138	0.05	0	-1.64345	7.78935
48h 2h	2.24876	2.04527	1.09949	0.30353	0.05	0	-2.46764	6.96516
48h 12h	3.01357	2.04527	1.47343	0.17886	0.05	0	-1.70283	7.72997
48h 24h	-0.05939	2.04527	-0.02904	0.97755	0.05	0	-4.77579	4.65701
PtERF007	MeanDiff	SEM	t Value	Prob	Alpha	Sig	LCL	UCL
12h 2h	0.22313	0.34132	0.65373	0.53162	0.05	0	-0.56396	1.01023
24h 2h	-0.04395	0.34132	-0.12877	0.90072	0.05	0	-0.83104	0.74314
24h 12h	-0.26709	0.34132	-0.7825	0.45646	0.05	0	-1.05418	0.52001
48h 2h	0.63805	0.34132	1.86933	0.09851	0.05	0	-0.14905	1.42514
48h 12h	0.41491	0.34132	1.2156	0.25879	0.05	0	-0.37218	1.202
48h 24h	0.682	0.34132	1.9981	0.08075	0.05	0	-0.1051	1.46909
PtERF001	MeanDiff	SEM	t Value	Prob	Alpha	Sig	LCL	UCL
12h 2h	-0.72274	0.42012	-1.72034	0.12368	0.05	0	-1.69153	0.24605
24h 2h	-0.56168	0.42012	-1.33698	0.218	0.05	0	-1.53047	0.4071
24h 12h	0.16105	0.42012	0.38336	0.71144	0.05	0	-0.80773	1.12984
48h 2h	0.33986	0.42012	0.80897	0.44193	0.05	0	-0.62893	1.30865
48h 12h	1.0626	0.42012	2.5293	0.03529	0.05	1	0.09381	2.03138
48h 24h	0.90154	0.42012	2.14594	0.06418	0.05	0	-0.06724	1.87033
PtERF006	MeanDiff	SEM	t Value	Prob	Alpha	Sig	LCL	UCL
12h 2h	-0.03758	0.24497	-0.1534	0.88188	0.05	0	-0.60249	0.52733
24h 2h	0.0218	0.24497	0.08898	0.93129	0.05	0	-0.54311	0.58671
24h 12h	0.05938	0.24497	0.24238	0.81458	0.05	0	-0.50553	0.62429
48h 2h	0.06735	0.24497	0.27493	0.79034	0.05	0	-0.49756	0.63226
48h 12h	0.10493	0.24497	0.42834	0.67971	0.05	0	-0.45998	0.66984
48h 24h	0.04555	0.24497	0.18595	0.85711	0.05	0	-0.51935	0.61046
PtERF003	MeanDiff	SEM	t Value	Prob	Alpha	Sig	LCL	UCL
12h 2h	0.32576	0.10525	3.09501	0.01478	0.05	1	0.08304	0.56847
24h 2h	0.01251	0.10525	0.11887	0.90831	0.05	0	-0.2302	0.25522
24h 12h	-0.31324	0.10525	-2.97614	0.0177	0.05	1	-0.55596	-0.07053
48h 2h	0.50675	0.10525	4.81466	0.00133	0.05	1	0.26404	0.74946
48h 12h	0.181	0.10525	1.71965	0.12381	0.05	0	-0.06171	0.42371
48h 24h	0.49424	0.10525	4.69579	0.00155	0.05	1	0.25153	0.73695
PtERF004	MeanDiff	SEM	t Value	Prob	Alpha	Sig	LCL	UCL
12h 2h	0.28945	0.3061	0.94561	0.37203	0.05	0	-0.41642	0.99533
24h 2h	0.07728	0.3061	0.25246	0.80705	0.05	0	-0.6286	0.78315
24h 12h	-0.21218	0.3061	-0.69315	0.50783	0.05	0	-0.91805	0.4937
48h 2h	0.33237	0.3061	1.08582	0.30919	0.05	0	-0.3735	1.03824
48h 12h	0.04292	0.3061	0.14021	0.89196	0.05	0	-0.66295	0.74879
48h 24h	0.25509	0.3061	0.83336	0.42882	0.05	0	-0.45078	0.96097
PtERF005	MeanDiff	SEM	t Value	Prob	Alpha	Sig	LCL	UCL
12h 2h	-228.828	446.416	-0.51259	0.62209	0.05	0	-1258.27	800.609
24h 2h	60.4758	446.416	0.13547	0.89559	0.05	0	-968.961	1089.91
24h 12h	289.304	446.416	0.64806	0.5351	0.05	0	-740.133	1318.74
48h 2h	468.455	446.416	1.04937	0.32467	0.05	0	-560.982	1497.89
48h 12h	697.283	446.416	1.56196	0.15692	0.05	0	-332.154	1726.72
48h 24h	407.979	446.416	0.9139	0.38748	0.05	0	-621.458	1437.42

## Sheet: Shoot
PtERF001	MeanDiff	SEM	t Value	Prob	Alpha	Sig	LCL	UCL
12h 2h	-0.91306	0.48113	-1.89774	0.0943	0.05	0	-2.02255	0.19643
24h 2h	-0.90255	0.48113	-1.87588	0.09752	0.05	0	-2.01204	0.20695
24h 12h	0.01052	0.48113	0.02186	0.9831	0.05	0	-1.09898	1.12001
48h 2h	-0.71147	0.48113	-1.47873	0.17747	0.05	0	-1.82096	0.39803
48h 12h	0.2016	0.48113	0.419	0.68624	0.05	0	-0.9079	1.31109
48h 24h	0.19108	0.48113	0.39715	0.70164	0.05	0	-0.91841	1.30057
PtERF002	MeanDiff	SEM	t Value	Prob	Alpha	Sig	LCL	UCL
12h 2h	-0.66561	0.70002	-0.95084	0.36953	0.05	0	-2.27986	0.94865
24h 2h	0.19312	0.70002	0.27588	0.78963	0.05	0	-1.42113	1.80738
24h 12h	0.85873	0.70002	1.22672	0.2548	0.05	0	-0.75552	2.47298
48h 2h	-0.70031	0.70002	-1.00042	0.3464	0.05	0	-2.31457	0.91394
48h 12h	-0.03471	0.70002	-0.04958	0.96167	0.05	0	-1.64896	1.57955
48h 24h	-0.89344	0.70002	-1.2763	0.23765	0.05	0	-2.50769	0.72082
PtERF003	MeanDiff	SEM	t Value	Prob	Alpha	Sig	LCL	UCL
12h 2h	3.37775	3.29205	1.02603	0.33489	0.05	0	-4.21372	10.9692
24h 2h	-1.48347	3.29205	-0.45062	0.66422	0.05	0	-9.07494	6.108
24h 12h	-4.86122	3.29205	-1.47666	0.17801	0.05	0	-12.4527	2.73025
48h 2h	-0.54578	3.29205	-0.16579	0.87244	0.05	0	-8.13725	7.04569
48h 12h	-3.92353	3.29205	-1.19182	0.26748	0.05	0	-11.515	3.66794
48h 24h	0.93769	3.29205	0.28483	0.78301	0.05	0	-6.65378	8.52916
PtERF004	MeanDiff	SEM	t Value	Prob	Alpha	Sig	LCL	UCL
12h 2h	-0.27467	0.21133	-1.29972	0.22989	0.05	0	-0.762	0.21266
24h 2h	-0.07205	0.21133	-0.34092	0.74194	0.05	0	-0.55938	0.41528
24h 12h	0.20262	0.21133	0.9588	0.36574	0.05	0	-0.2847	0.68995
48h 2h	-0.34475	0.21133	-1.63133	0.14147	0.05	0	-0.83208	0.14258
48h 12h	-0.07008	0.21133	-0.3316	0.74871	0.05	0	-0.55741	0.41725
48h 24h	-0.2727	0.21133	-1.29041	0.23295	0.05	0	-0.76003	0.21463
PtERF005	MeanDiff	SEM	t Value	Prob	Alpha	Sig	LCL	UCL
12h 2h	-93.9365	243.805	-0.38529	0.71006	0.05	0	-656.151	468.277
24h 2h	-374.772	243.805	-1.53718	0.1628	0.05	0	-936.986	187.442
24h 12h	-280.835	243.805	-1.15189	0.28262	0.05	0	-843.049	281.379
48h 2h	-161.612	243.805	-0.66288	0.52604	0.05	0	-723.826	400.602
48h 12h	-67.6759	243.805	-0.27758	0.78837	0.05	0	-629.89	494.538
48h 24h	213.159	243.805	0.8743	0.40743	0.05	0	-349.055	775.373
PtERF006	MeanDiff	SEM	t Value	Prob	Alpha	Sig	LCL	UCL
12h 2h	-0.80147	0.91468	-0.87622	0.40645	0.05	0	-2.91073	1.3078
24h 2h	-0.40982	0.91468	-0.44804	0.66601	0.05	0	-2.51908	1.69945
24h 12h	0.39165	0.91468	0.42818	0.67982	0.05	0	-1.71762	2.50091
48h 2h	0.01496	0.91468	0.01635	0.98735	0.05	0	-2.09431	2.12422
48h 12h	0.81642	0.91468	0.89257	0.39814	0.05	0	-1.29284	2.92569
48h 24h	0.42478	0.91468	0.4644	0.65474	0.05	0	-1.68449	2.53404
PtERF007	MeanDiff	SEM	t Value	Prob	Alpha	Sig	LCL	UCL
12h 2h	-1.66764	0.45444	-3.66969	0.00631	0.05	1	-2.71557	-0.61971
24h 2h	-1.68182	0.45444	-3.70089	0.00603	0.05	1	-2.72975	-0.63389
24h 12h	-0.01418	0.45444	-0.03121	0.97587	0.05	0	-1.06211	1.03375
48h 2h	-1.43068	0.45444	-3.14827	0.01363	0.05	1	-2.47861	-0.38275
48h 12h	0.23695	0.45444	0.52142	0.6162	0.05	0	-0.81098	1.28488
48h 24h	0.25113	0.45444	0.55263	0.59562	0.05	0	-0.7968	1.29906
