# Supplementary material for: Structure and expression analysis of seven salt-related ERF genes of Populus
Source: PeerJ. 2020 Oct 20;8:e10206. doi: 10.7717/peerj.10206 (PMC7583627; doi:10.7717/peerj.10206)
Supplement: Supplemental Information 11 [file peerj-08-10206-s011.xlsx]

## Sheet: Sheet1
	Mean	SE	No.	Mean	SE	No.
PtERF001	S			W
Root	16.17	2.44167	3	11.84	3.61211	3
Stem	9.02667	2.58252	3	3.84	1.10753	3
Leaf	6.18	1.61335	3	2.30333	0.357134	3
Shoot	4.73667	0.0470225	3	4.55667	2.05662	3
PtERF002	S			W
Root	6.91667	1.6426	3	3.07	0.583895	3
Stem	13.98	1.10964	3	5.89	0.942992	3
Leaf	1.23333	0.140989	3	0.416667	0.11348	3
Shoot	12.1467	1.31258	3	14.9567	0.31466	3
PtERF003	S			W
Root	0.183333	0.113186	3	0.283333	0.283333	3
Stem	0.313333	0.180216	3	0.0866667	0.0520683	3
Leaf	0.23	0.23	3	0.23	0.23	3
Shoot	7.61667	2.4557	3	4.23	0.50659	3
PtERF004	S			W
Root	5.85333	0.434063	3	3.74333	0.986751	3
Stem	18.0767	11.9521	3	7.37333	3.54204	3
Leaf	4.83	1.97662	3	3.69667	0.490249	3
Shoot	2.28333	0.493705	3	6.50667	2.37028	3
PtERF005	S			W
Root	5.09	0.353034	3	1.89667	1.07766	3
Stem	14.2667	3.02018	3	5.87667	1.21842	3
Leaf	6.73	1.14692	3	2.33	0.711641	3
Shoot	2.21	0.113578	3	2.36	0.966971	3
PtERF006	S			W
Root	0.226667	0.0902466	3	0.216667	0.117237	3
Stem	0.573333	0.103976	3	0.35	0.0754983	3
Leaf	1.49667	0.670332	3	0.343333	0.0800694	3
Shoot	0.906667	0.234828	3	0.0433333	0.0218581	3
PtERF007	S			W
Root	0.156667	0.0800694	3	0.486667	0.0808977	3
Stem	0.75	0.167033	3	0.193333	0.0841295	3
Leaf	0.466667	0.21489	3	0.263333	0.0775314	3
Shoot	3.23	0.56205	3	1.77333	0.296723	3
