# Supplementary material for: Structure and expression analysis of seven salt-related ERF genes of Populus
Source: PeerJ. 2020 Oct 20;8:e10206. doi: 10.7717/peerj.10206 (PMC7583627; doi:10.7717/peerj.10206)
Supplement: Supplemental Information 12 [file peerj-08-10206-s012.xlsx]

## Sheet: 表达相关分析表
gene id	gene_name	connected gene id	connected gene name	cor	p value	q value
Potri.002G039100.v4.1	Potri.002G039100	Potri.005G195000.v4.1	Potri.005G195000	0.547314	0.005639	0.018422
Potri.002G039100.v4.1	Potri.002G039100	Potri.011G061700.v4.1	Potri.011G061700	0.580965	0.002911	0.012967
Potri.005G195000.v4.1	Potri.005G195000	Potri.011G061700.v4.1	Potri.011G061700	0.639878	0.000759	0.004133
Potri.006G138900.v4.1	Potri.006G138900	Potri.018G038100.v4.1	Potri.018G038100	0.553043	0.005063	0.018422
