# Supplementary material for: Structure and expression analysis of seven salt-related ERF genes of Populus
Source: PeerJ. 2020 Oct 20;8:e10206. doi: 10.7717/peerj.10206 (PMC7583627; doi:10.7717/peerj.10206)
Supplement: Supplemental Information 15 [file peerj-08-10206-s015.xlsx]

## Sheet: peerj-50455-gene.count.matrix.a
gene_id	gene_name	description	length	S1_1	S1_2	S1_3	S1_4	S2_1	S2_2	S2_3	S2_4	S3_1	S3_2	S3_3	S3_4	T1	T2	T3	W1_1	W1_2	W1_3	W1_4	W2_1	W2_2	W2_3	W2_4	W3_1	W3_2	W3_3	W3_4	S_apex	S_leaf	S_root	S_stem	T_leaf	W_apex	W_leaf	W_root	W_stem	nr	go	KO_id	KO_name	paths	cog	cog_description	pfam	swissprot	entrez
MSTRG.1000			432	0	0	0	0	0	2	0	0	0	0	0	1	1	1	2	1	1	4	0	1	0	2	2	0	1	2	2	0	0.6667	0.3333	0	1.3333	0.6667	0.6667	1.3333	2.6667
MSTRG.10010			227	7	4.85	2.82	1	2	2	1	2	2	1	0	4.99	9	9	11.7	4	5	2	0.99	3	6	0	9	3	6	1	0.75	3.6667	2.6167	2.6633	1.2733	9.9	3.3333	5.6667	3.58	1
MSTRG.1002			621	5	0	0	23	2	2	4	15	21	0	2	10	1	0	0	2	2	1	8	8	0	0	16	11	0	5	6	9.3333	0.6667	16	2	0.3333	7	0.6667	10	2
MSTRG.10058			412	12	14	12	10	17	25	12	6	28	19	12	14	16	23	14	14	32	13	9	15	15	19	7	29	27	10	11	19	19.3333	10	12	17.6667	19.3333	24.6667	9	14	XP_011043180.1(PREDICTED: uncharacterized protein LOC105138707 [Populus euphratica])	GO:0018025(molecular_function:calmodulin-lysine N-methyltransferase activity); GO:0005737(cellular_component:cytoplasm)	K18826	CAMKMT	map00310(Lysine degradation)	ENOG4110DEX(S:Function unknown)	ENOG4110DEX(Calmodulin-lysine N-methyltransferase)		sp|F4JNX3|CMKMT_ARATH(Calmodulin-lysine N-methyltransferase OS=Arabidopsis thaliana OX=3702 GN=CaMKMT PE=2 SV=1)
MSTRG.10070			399	41.2	28.21	35.03	2119.78	17.94	20.76	57.52	2139.85	49.47	26.51	17.91	1729.96	26.29	28.92	35.83	62.16	41.53	47.72	1852.27	45.13	67.6	38.39	1369.96	55.16	38.84	40.05	1124.37	36.2033	25.16	1996.53	36.82	30.3467	54.15	49.3233	1448.87	42.0533	ABK94757.1(unknown [Populus trichocarpa])	GO:0046872(molecular_function:metal ion binding); GO:0045486(molecular_function:naringenin 3-dioxygenase activity); GO:0051213(molecular_function:dioxygenase activity); GO:0016491(molecular_function:oxidoreductase activity)	K00475	F3H	map00941(Flavonoid biosynthesis)	COG3491(S:Function unknown)	COG3491(2OGFe(II) oxygenase)	PF14226.6(DIOX_N:non-haem dioxygenase in morphine synthesis N-terminal)	sp|Q07353|FL3H_PETHY(Naringenin,2-oxoglutarate 3-dioxygenase (Fragment) OS=Petunia hybrida OX=4102 GN=AN3 PE=1 SV=1)
MSTRG.10129			410	0	0	0	9	1	2	0	6	0	2	0	6	0	1	0	1	1	0	5	0	2	0	3	0	0	0	8	0.3333	1.3333	7	0	0.3333	0.3333	1	5.3333	0
MSTRG.10140			1087	1310.07	1634.14	1568.94	2583.05	1036.54	1806.06	1553.48	2022.45	1187.07	1832.21	1429.49	2207.6	1420.74	1549.5	1488.04	1422.11	2343.71	1602.73	2404.26	1058.4	1985.44	1636.26	2195.28	1445.44	1864.65	1493.74	1426.92	1177.89	1757.47	2271.03	1517.3	1486.09	1308.65	2064.6	2008.82	1577.58	ABK95606.1(unknown [Populus trichocarpa] )	GO:0016021(cellular_component:integral component of membrane)
MSTRG.10145			401	0	0	0	0	0	0	0	0	0	0	0	0	0	0	0	0	0	1.02	0	0	0	0	0	0	0	0	0	0	0	0	0	0	0	0	0	0.34
MSTRG.1017			737	16	5	12	17	7	14	17	24	13	7	20	21	41	59	39	24	25	14	23	24	45	17	35	41	61	19	17	12	8.6667	20.6667	16.3333	46.3333	29.6667	43.6667	25	16.6667
MSTRG.10196			288	0	0	0	1	0	0	0	5	3	0	0	1	0	1	2	1	0	0	3	0	0	0	4	0	0	0	0	1	0	2.3333	0	1	0.3333	0	2.3333	0	XP_004148046.1(PREDICTED: uncharacterized protein LOC101208336 [Cucumis sativus] )
MSTRG.10197			209	0	0	0	0	0	0	0	0	0	0	0	0	0	0	0	0	0	0	0	0	0	0	0	0	0	0	0	0	0	0	0	0	0	0	0	0
MSTRG.10214			556	1	1	0	4	2	0	2	9	5	1	0	6	1	0	2	5	1	0	4	3	1	3	11	12	0	1	6	2.6667	0.6667	6.3333	0.6667	1	6.6667	0.6667	7	1.3333
MSTRG.10295			211	0	6.44	3.47	6.02	7.11	15.7	7.35	1.2	6.43	7.41	9.14	5.01	8.94	2.9	7.88	8.69	5.5	5.33	4.41	10.87	8.96	7.6	6.63	10.95	6.99	8.91	6	4.5133	9.85	4.0767	6.6533	6.5733	10.17	7.15	5.68	7.28	PNT03199.1(hypothetical protein POPTR_014G056100 [Populus trichocarpa])					ENOG411206Y(T:Signal transduction mechanisms); ENOG410YZWQ(T:Signal transduction mechanisms)	ENOG411206Y(Casein Kinase); ENOG410YZWQ(Casein Kinase)
MSTRG.10315			323	6	3	1	4	1	2	0	5	0	3	3	2	5	2	1	2	1	0	7	1	3	3	2	1	4	2	6	2.3333	2.6667	3.6667	1.3333	2.6667	1.3333	2.6667	5	1.6667	PNT36796.1(hypothetical protein POPTR_005G148200 [Populus trichocarpa])
MSTRG.10323			774	4	1	10	4	6	2	4	2	4	5	6	3	15	13	11	4	7	14	3	7	14	17	13	14	12	13	3	4.6667	2.6667	3	6.6667	13	8.3333	11	6.3333	14.6667
MSTRG.10324			375	4	4	8	0	2	3	17	1	4	9	16	1	21	14	9	3	2	12	1	4	8	14	0	4	16	17	0	3.3333	5.3333	0.6667	13.6667	14.6667	3.6667	8.6667	0.3333	14.3333
MSTRG.10327			2613	35	26	46	28	28	37	39	26	37	32	36	36	44	56	60	31	64	48	41	30	51	39	33	31	50	55	19	33.3333	31.6667	30	40.3333	53.3333	30.6667	55	31	47.3333	PNT36818.1(hypothetical protein POPTR_005G149900 [Populus trichocarpa])	GO:0016740(molecular_function:transferase activity)
MSTRG.10342			1194	32.15	27.72	72.29	127.04	31.29	37.18	68.61	114.71	51.83	32.71	73.57	127.41	29.06	41.77	28.01	41.43	30.56	64.14	110.48	26.45	32.59	55.89	135.18	46.63	22.77	60.58	81.64	38.4233	32.5367	123.053	71.49	32.9467	38.17	28.64	109.1	60.2033	XP_024453248.1(uncharacterized protein LOC112326930 [Populus trichocarpa])	GO:0016779(molecular_function:nucleotidyltransferase activity); GO:0005634(cellular_component:nucleus); GO:0004523(molecular_function:RNA-DNA hybrid ribonuclease activity); GO:0015074(biological_process:DNA integration); GO:0008270(molecular_function:zinc ion binding); GO:0003676(molecular_function:nucleic acid binding)
MSTRG.10346			205	5.18	9.46	6.88	11.97	6.08	7.53	6.37	6.88	2.56	10.91	5.43	3.4	13.61	12.8	10.6	13.22	10.44	4.65	9.83	5.73	9.34	15.59	19.81	9.74	9.62	6.14	1.85	4.6067	9.3	7.4167	6.2267	12.3367	9.5633	9.8	10.4967	8.7933	PNS99930.1(hypothetical protein POPTR_015G018300, partial [Populus trichocarpa])
MSTRG.10347			274	27	24.24	16.06	20.38	26.35	20.93	29.57	17.87	44.84	18.37	31.82	16.08	17.03	18.08	29.72	16.99	6.44	17.01	21.36	22.01	23.61	41.87	30.07	16.52	22.06	29.26	17.77	32.73	21.18	18.11	25.8167	21.61	18.5067	17.37	23.0667	29.38	PNT43355.1(hypothetical protein POPTR_003G029800 [Populus trichocarpa])	GO:0016021(cellular_component:integral component of membrane)
MSTRG.10350			618	63.43	7	43.6	24.64	48.36	4.79	14.77	28.6	83.15	8.99	39.68	20.99	2	9.82	0	40.78	1.99	58.36	11.54	37.23	3.99	42	12.99	52.87	0	64.29	6.65	64.98	6.9267	24.7433	32.6833	3.94	43.6267	1.9933	10.3933	54.8833	XP_006383809.2(kinesin-like protein KIN-4C [Populus trichocarpa] )	GO:0008017(molecular_function:microtubule binding); GO:0007018(biological_process:microtubule-based movement); GO:0007052(biological_process:mitotic spindle organization); GO:0005524(molecular_function:ATP binding); GO:0016887(molecular_function:ATPase activity); GO:0005871(cellular_component:kinesin complex); GO:0005874(cellular_component:microtubule); GO:0003777(molecular_function:microtubule m…	K10395	KIF4_21_27		COG5059(M:Cell wall/membrane/envelope biogenesis)	COG5059(Mechanosensitive ion channel)		sp|F4K0J3|KN4C_ARATH(Kinesin-like protein KIN-4C OS=Arabidopsis thaliana OX=3702 GN=KIN4C PE=2 SV=2)
MSTRG.10356			256	1	0	0	0	0	0	0	0	0	2	0	0	3	0	2.03	0	1.98	0	0	0	5	0	0	0	0	0	0	0.3333	0.6667	0	0	1.6767	0	2.3267	0	0	XP_023880430.1(LOW QUALITY PROTEIN: uncharacterized protein LOC111992800, partial [Quercus suber])	GO:0003964(molecular_function:RNA-directed DNA polymerase activity); GO:0015074(biological_process:DNA integration); GO:0016021(cellular_component:integral component of membrane); GO:0008270(molecular_function:zinc ion binding); GO:0003676(molecular_function:nucleic acid binding)				COG2801(L:Replication, recombination and repair)	COG2801(Retrotransposon protein)	PF00078.27(RVT_1:Reverse transcriptase (RNA-dependent DNA polymerase))	sp|P20825|POL2_DROME(Retrovirus-related Pol polyprotein from transposon 297 OS=Drosophila melanogaster OX=7227 GN=pol PE=4 SV=1)
MSTRG.10357			235	9	5	7	3	4.9	10	4.01	7.99	9	8	10.93	4	4.99	6	5	10	8	14	10.01	12.66	7	16	2	4.93	4.01	15	9	7.6333	7.6667	4.9967	7.3133	5.33	9.1967	6.3367	7.0033	15
MSTRG.10359			258	0	0	3	1	2	0	0	1	0	0	0	0	0	3	0	0	1	1	4	0	2	0	0	1	0	0	3	0.6667	0	0.6667	1	1	0.3333	1	2.3333	0.3333	XP_020406471.1(uncharacterized protein LOC109945085, partial [Zea mays])					COG2801(L:Replication, recombination and repair)	COG2801(Retrotransposon protein)		sp|Q99315|YG31B_YEAST(Transposon Ty3-G Gag-Pol polyprotein OS=Saccharomyces cerevisiae (strain ATCC 204508 / S288c) OX=559292 GN=TY3B-G PE=1 SV=3)
MSTRG.10377			824	2	0	1	0	0	1	0	0	8	0	0	0	1	0	2	5	1	0	0	4	1	0	0	7	0	3	0	3.3333	0.3333	0	0.3333	1	5.3333	0.6667	0	1	TKR68751.1(hypothetical protein D5086_0000306910 [Populus alba])	GO:0008270(molecular_function:zinc ion binding); GO:0009451(biological_process:RNA modification)				ENOG410Z7Z7(S:Function unknown)	ENOG410Z7Z7(WD and tetratricopeptide repeats)
MSTRG.10385			635	3.12	0	2	6.25	0	1.82	0	1.57	1.15	0	0	3.73	3.69	0	3.02	1.75	0	0	3.93	2.23	2.41	0	4.45	1.53	6.28	2.93	3.83	1.4233	0.6067	3.85	0.6667	2.2367	1.8367	2.8967	4.07	0.9767	PNT36971.1(hypothetical protein POPTR_005G160600 [Populus trichocarpa])	GO:0003824(molecular_function:catalytic activity); GO:0004721(molecular_function:phosphoprotein phosphatase activity)	K17508	PTC7, PPTC7		COG0631(S:Function unknown)	COG0631(LRR)	PF07228.12(SpoIIE:Stage II sporulation protein E (SpoIIE)); PF13672.6(PP2C_2:Protein phosphatase 2C)	sp|Q9SUK9|P2C55_ARATH(Probable protein phosphatase 2C 55 OS=Arabidopsis thaliana OX=3702 GN=At4g16580 PE=2 SV=2)
MSTRG.10386			200	1	0	4	4.98	0	1	1	0	1	2	3	2	3	3	2.92	2.99	0.99	0	0	1	3	4	0	6.99	0	0	1	0.6667	1	2.3267	2.6667	2.9733	3.66	1.33	0.3333	1.3333	XP_024455896.1(zinc finger BED domain-containing protein RICESLEEPER 2 [Populus trichocarpa])					ENOG410ZT99(S:Function unknown); ENOG4111T8J(S:Function unknown)	ENOG410ZT99(Pfam:hATC); ENOG4111T8J(transposon protein)	PF14372.6(DUF4413:Domain of unknown function (DUF4413))
MSTRG.10397			280	0	0	0	0	1	2	1	0	1	1	0	0	0	1	0	1	0	0	0	0	0	0	0	0	4	0	0	0.6667	1	0	0.3333	0.3333	0.3333	1.3333	0	0
MSTRG.10409			241	0	0	2	0	0	5	0	0	0	0	0	0	0	0	1	0	0	0	2	2	0	0	0	0	0	0	0	0	1.6667	0	0.6667	0.3333	0.6667	0	0.6667	0	TKS04177.1(hypothetical protein D5086_0000143780 [Populus alba])	GO:0046983(molecular_function:protein dimerization activity)
MSTRG.10479			568	25	61	11	5	19	55	24	10	13	67	8	4	89	45	92	27	114	19	11	28	69	16	8	30	98	21	7	19	61	6.3333	14.3333	75.3333	28.3333	93.6667	8.6667	18.6667
MSTRG.10509			413	0	1	0	0	0	1	0	1	0	0	1	1	0	0	2	1	0	0	1	1	1	0	0	1	3	0	0	0	0.6667	0.6667	0.3333	0.6667	1	1.3333	0.3333	0
MSTRG.10529			383	18	18	10	2	9	18	1	3	13	15	5	0	13	17	20	10	9	3	2	12	16	1	9	5	19	4	5	13.3333	17	1.6667	5.3333	16.6667	9	14.6667	5.3333	2.6667	YP_009054183.1(NADH-plastoquinone oxidoreductase chain 4 (chloroplast) [Populus balsamifera] )	GO:0009535(cellular_component:chloroplast thylakoid membrane); GO:0015990(biological_process:electron transport coupled proton transport); GO:0008137(molecular_function:NADH dehydrogenase (ubiquinone) activity); GO:0016021(cellular_component:integral component of membrane); GO:0009060(biological_process:aerobic respiration); GO:0005747(cellular_component:mitochondrial respiratory chain complex I)…	K05575	ndhD	map00190(Oxidative phosphorylation)	COG1008(C:Energy production and conversion)	COG1008(subunit m)		sp|Q14FA8|NU4C_POPAL(NAD(P)H-quinone oxidoreductase chain 4, chloroplastic OS=Populus alba OX=43335 GN=ndhD PE=3 SV=1)
MSTRG.10537			1185	18	12	13	6	14	22	11	19	25	22	14	21	31	27	21	18	33	12	14	22	15	18	10	25	24	21	14	19	18.6667	15.3333	12.6667	26.3333	21.6667	24	12.6667	17
MSTRG.10553			327	6	0	9	0	4	0	2	1	1	2	6	0	1	0	1	0	1	1	0	4	1	6	1	7	0	5	0	3.6667	0.6667	0.3333	5.6667	0.6667	3.6667	0.6667	0.3333	4	RQO90722.1(hypothetical protein POPTR_005G183250 [Populus trichocarpa])
MSTRG.10557			364	22	56	25	50	17	59	76	29	19	54	29	42	18	12	13	35	35	28	27	17	16	20	37	19	13	18	32	19.3333	56.3333	40.3333	43.3333	14.3333	23.6667	21.3333	32	22	PNT37360.1(hypothetical protein POPTR_005G184100 [Populus trichocarpa])
MSTRG.10566			233	4	4	9	6	8	10	8	5	10	10	7	11	7	11	12	7	15	6	4	6	6	3	5	7	2	3.98	6	7.3333	8	7.3333	8	10	6.6667	7.6667	5	4.3267
MSTRG.10609			761	804	764	1159	2034	745	762	1015	1849	889	911	1407	1900	607	754	596	1092	835	1573	1675	948	687	1623	1767	1280	693	1659	1480	812.667	812.333	1927.67	1193.67	652.333	1106.67	738.333	1640.67	1618.33	XP_002307493.1(cytochrome b-c1 complex subunit 6 [Populus trichocarpa] )	GO:0005743(cellular_component:mitochondrial inner membrane); GO:0008121(molecular_function:ubiquinol-cytochrome-c reductase activity); GO:0006122(biological_process:mitochondrial electron transport, ubiquinol to cytochrome c); GO:0005739(cellular_component:mitochondrion); GO:0005750(cellular_component:mitochondrial respiratory chain complex III); GO:0009060(biological_process:aerobic respiration)…	K00416	QCR6, UQCRH	map00190(Oxidative phosphorylation); map04714(Thermogenesis)	ENOG411247S(G:Carbohydrate transport and metabolism)	ENOG411247S(D-fructose-1,6-bisphosphate 1-phosphohydrolase class 1)	PF02320.16(UCR_hinge:Ubiquinol-cytochrome C reductase hinge protein)	sp|P48504|QCR6_SOLTU(Cytochrome b-c1 complex subunit 6 OS=Solanum tuberosum OX=4113 PE=1 SV=2)
MSTRG.10619			303	0	0	0	0	1	0	0	0	1	0	0	0	0	1	1	0	0	0	0	0	0	0	0	0	1	0	0	0.6667	0	0	0	0.6667	0	0.3333	0	0
MSTRG.10620			265	1	0	0	1	0	2	2	3	1	1	1	1	1	2	1	4	0	2	0	4	0	1	3	4	2	0	0	0.6667	1	1.6667	1	1.3333	4	0.6667	1	1
MSTRG.10675			743	2	1	2	2	3	8	0	1	8	5	1	0	14	8	2	5	6	1	2	3	2	2	3	6	5	3	1	4.3333	4.6667	1	1	8	4.6667	4.3333	2	2	TKS03608.1(hypothetical protein D5086_0000156050 [Populus alba])	GO:0106029(deleted:old GO); GO:0008033(biological_process:tRNA processing); GO:0001522(biological_process:pseudouridine synthesis); GO:0003723(molecular_function:RNA binding)	K01855	PUS3, DEG1		COG0101(M:Cell wall/membrane/envelope biogenesis)	COG0101(Phospho-2-dehydro-3-deoxyoctonate aldolase)
MSTRG.10676			947	3	7	6	0	3	8	63	6	5	3	13	3	7	5	12	1	4	41	8	6	11	52	6	3	7	45	9	3.6667	6	3	27.3333	8	3.3333	7.3333	7.6667	46	PNT37630.1(hypothetical protein POPTR_005G199400 [Populus trichocarpa])	GO:0106029(deleted:old GO); GO:0008033(biological_process:tRNA processing); GO:0001522(biological_process:pseudouridine synthesis); GO:0003723(molecular_function:RNA binding)	K01855	PUS3, DEG1		COG0101(J:Translation, ribosomal structure and biogenesis)	COG0101(Formation of pseudouridine at positions 38, 39 and 40 in the anticodon stem and loop of transfer RNAs (By similarity))	PF01416.20(PseudoU_synth_1:tRNA pseudouridine synthase)
MSTRG.10677			837	2	1	6	0	0	0	15	5	1	1	7	1	1	5	2	2	1	15	1	1	2	23	1	3	1	18	2	1	0.6667	2	9.3333	2.6667	2	1.3333	1.3333	18.6667	PNT37631.1(hypothetical protein POPTR_005G199500 [Populus trichocarpa])	GO:0106029(deleted:old GO); GO:0008033(biological_process:tRNA processing); GO:0001522(biological_process:pseudouridine synthesis); GO:0003723(molecular_function:RNA binding)	K01855	PUS3, DEG1		COG0101(J:Translation, ribosomal structure and biogenesis)	COG0101(Formation of pseudouridine at positions 38, 39 and 40 in the anticodon stem and loop of transfer RNAs (By similarity))
MSTRG.10716			209	0	0	0	0	0	0	0	0	0	0	0	0	0	0	0	0	0	0	0	0	0	0	0	0	0	1	0	0	0	0	0	0	0	0	0	0.3333
MSTRG.10764			807	11	4	18	12	6	6	15	15	14	7	9	17	11	12	9	9	8	8	13	9	9	8	7	14	8	16	4	10.3333	5.6667	14.6667	14	10.6667	10.6667	8.3333	8	10.6667	XP_018833999.1(PREDICTED: uncharacterized protein LOC109001255 [Juglans regia])	GO:0000943(cellular_component:retrotransposon nucleocapsid); GO:0016021(cellular_component:integral component of membrane); GO:0015074(biological_process:DNA integration); GO:0008270(molecular_function:zinc ion binding); GO:0003676(molecular_function:nucleic acid binding); GO:0003860(molecular_function:3-hydroxyisobutyryl-CoA hydrolase activity)				ENOG41124XI(T:Signal transduction mechanisms); COG2801(L:Replication, recombination and repair); ENOG410XS4D(S:Function unknown)	ENOG41124XI(dual specificity protein phosphatase); COG2801(Retrotransposon protein); ENOG410XS4D(Retrotransposon protein)		sp|Q94HW2|POLR1_ARATH(Retrovirus-related Pol polyprotein from transposon RE1 OS=Arabidopsis thaliana OX=3702 GN=RE1 PE=2 SV=1)
MSTRG.10768			347	0	0	0	0	0	0	0	4	0	0	0	0	3	0	1	1	0	0	0	0	0	0	2	0	1	0	0	0	0	1.3333	0	1.3333	0.3333	0.3333	0.6667	0	PKI40487.1(hypothetical protein CRG98_039123 [Punica granatum])	GO:0004523(molecular_function:RNA-DNA hybrid ribonuclease activity); GO:0003676(molecular_function:nucleic acid binding); GO:0008270(molecular_function:zinc ion binding)				ENOG410Y65V(S:Function unknown)	ENOG410Y65V(Retrotransposon protein)		sp|P0C2F6|RNHX1_ARATH(Putative ribonuclease H protein At1g65750 OS=Arabidopsis thaliana OX=3702 GN=At1g65750 PE=3 SV=1)
MSTRG.10804			442	1	3	0	7	5	2	3	3	4	9	1	4	2	2	1	0	6	1	0	5	1	10	0	1	3	5	3	3.3333	4.6667	4.6667	1.3333	1.6667	2	3.3333	1	5.3333
MSTRG.10805			720	23	38	3	16	8	50	5	15	11	46	8	10	13	9	2	16	27	0	16	20	45	4	16	21	27	5	16	14	44.6667	13.6667	5.3333	8	19	33	16	3
MSTRG.10817			1635	79.95	76.59	41	70.55	60.82	67.61	42.77	52.11	92.41	74.4	56.78	42.8	118.29	119.49	124.69	83.05	107.36	45.06	60.44	69.8	74.75	48.15	67.26	95.7	106.05	62.57	44.06	77.7267	72.8667	55.1533	46.85	120.823	82.85	96.0533	57.2533	51.9267
MSTRG.10822			245	0	2	2	0	0	4	1	5	0	0	0	5	0	0	0	3	0	1	0	0	1	0	1	2	6	1	2	0	2	3.3333	1	0	1.6667	2.3333	1	0.6667	VDD24108.1(unnamed protein product [Brassica rapa])	GO:0051287(molecular_function:NAD binding); GO:0048038(molecular_function:quinone binding); GO:0016651(molecular_function:oxidoreductase activity, acting on NAD(P)H)
MSTRG.1084			209	2	0	0	1	0	0	1	1	0	0	3	0	0	0	0	0	0	0	0	0	0	1	0	0	0	1	3	0.6667	0	0.6667	1.3333	0	0	0	1	0.6667
MSTRG.10849			1542	22	8	17	21	13	23	23	19	16	12	23	20	17	27	26	33	18	30	14	22	8	27	18	31	20	28	14	17	14.3333	20	21	23.3333	28.6667	15.3333	15.3333	28.3333	PNT38050.1(hypothetical protein POPTR_005G219900 [Populus trichocarpa])
MSTRG.10850			366	5	0	3	1	0	4	1	0	1	0	1	0	1	0	0	7	1	0	0	0	0	5	0	1	0	0	0	2	1.3333	0.3333	1.6667	0.3333	2.6667	0.3333	0	1.6667
MSTRG.10851			834	22	9	6	0	11	8	5	1	6	8	7	0	20	23	9	15	17	11	0	19	14	8	2	15	16	5	0	13	8.3333	0.3333	6	17.3333	16.3333	15.6667	0.6667	8
MSTRG.10861			426	4	5	2	1	4	1	5	2	1	3	2	1	7	10	14	6	4	0	5	4	5	7	0	6	6	2	0	3	3	1.3333	3	10.3333	5.3333	5	1.6667	3	XP_016580539.1(PREDICTED: uncharacterized protein LOC107878128 [Capsicum annuum])	GO:0016021(cellular_component:integral component of membrane)						PF14223.6(Retrotran_gag_2:gag-polypeptide of LTR copia-type); PF03732.17(Retrotrans_gag:Retrotransposon gag protein)	sp|Q94HW2|POLR1_ARATH(Retrovirus-related Pol polyprotein from transposon RE1 OS=Arabidopsis thaliana OX=3702 GN=RE1 PE=2 SV=1)
MSTRG.10862			373	2	0	0	2	0	0	0	1	0	1	1	0	7	4	1	1	0	2	0	0	2	0	3	0	1	0	0	0.6667	0.3333	1	0.3333	4	0.3333	1	1	0.6667	OTG15986.1(putative ribonuclease H-like domain-containing protein [Helianthus annuus])	GO:0000943(cellular_component:retrotransposon nucleocapsid); GO:0015074(biological_process:DNA integration); GO:0003964(molecular_function:RNA-directed DNA polymerase activity); GO:0003723(molecular_function:RNA binding); GO:0003676(molecular_function:nucleic acid binding)				ENOG410ZK3M(S:Function unknown)	ENOG410ZK3M(-)		sp|Q94HW2|POLR1_ARATH(Retrovirus-related Pol polyprotein from transposon RE1 OS=Arabidopsis thaliana OX=3702 GN=RE1 PE=2 SV=1)
MSTRG.10870			424	2	0	0	4	1	1	3	1	3	0	0	2	0	0	1	2	0	1	4	2	0	2	6	3	0	4	2	2	0.3333	2.3333	1	0.3333	2.3333	0	4	2.3333	OAY34576.1(hypothetical protein MANES_12G030900 [Manihot esculenta])	GO:0016021(cellular_component:integral component of membrane)
MSTRG.10882			219	0	0	0	0	0	0	0	0	0	0	0	1	0	0	0	0	0	0	0	0	0	0	3	0	0	0	0	0	0	0.3333	0	0	0	0	1	0
MSTRG.10885			271	70	0	25.61	27	35	31.56	26	17	36	164	19.65	0	0	10	10	36	35	11	15	17.02	0	17	35.14	20	41	3	0	47	65.1867	14.6667	23.7533	6.6667	24.34	25.3333	16.7133	10.3333	XP_002306844.3(inorganic phosphate transporter 1-4 [Populus trichocarpa] )	GO:0006817(biological_process:phosphate ion transport); GO:0016021(cellular_component:integral component of membrane); GO:0005315(molecular_function:inorganic phosphate transmembrane transporter activity)	K08176	PHO84		ENOG410ZVN7(G:Carbohydrate transport and metabolism)	ENOG410ZVN7(phosphate transporter)		sp|Q96303|PHT14_ARATH(Inorganic phosphate transporter 1-4 OS=Arabidopsis thaliana OX=3702 GN=PHT1-4 PE=1 SV=1)
MSTRG.10886			271	0	39	1.39	0	0	25.44	0	0	0	0	0	29	19	0	0	0	0	0	0	0	45	0	0	0	0	0	18	0	21.48	9.6667	0.4633	6.3333	0	15	6	0	XP_002306844.3(inorganic phosphate transporter 1-4 [Populus trichocarpa] )	GO:0006817(biological_process:phosphate ion transport); GO:0016021(cellular_component:integral component of membrane); GO:0005315(molecular_function:inorganic phosphate transmembrane transporter activity)	K08176	PHO84		ENOG410ZVN7(G:Carbohydrate transport and metabolism)	ENOG410ZVN7(phosphate transporter)		sp|Q96303|PHT14_ARATH(Inorganic phosphate transporter 1-4 OS=Arabidopsis thaliana OX=3702 GN=PHT1-4 PE=1 SV=1)
MSTRG.10926			326	6.2	0	0	0	1.08	0	0	0	2	0	1.06	0	0	3	0	1	0	2.11	0	0	0	1	0	1.04	0	2	0	3.0933	0	0	0.3533	1	0.68	0	0	1.7033
MSTRG.10948			218	0	0	0	0	1	0	0	0	1	2	0	0	1	2	0	0	1	0	0	0	0	0	0	0	0	0	1	0.6667	0.6667	0	0	1	0	0.3333	0.3333	0
MSTRG.10977			547	4	0	3	1	1	0	8	1	5	0	5	4	0	0	0	0	0	5	1	1	0	5	3	0	0	3	4	3.3333	0	2	5.3333	0	0.3333	0	2.6667	4.3333
MSTRG.10995			205	0	2	0	0	0	0	0	0	0	0	0	0	0	0	0	0	0	0	0	0	0	0	0	0	0	0	0	0	0.6667	0	0	0	0	0	0	0	RQO90986.1(hypothetical protein POPTR_005G235350 [Populus trichocarpa])
MSTRG.11039			437	0	0	0	1	0	0	0	2	0	0	0	1	0	0	0	0	0	0	0	0	0	0	4	0	0	0	0	0	0	1.3333	0	0	0	0	1.3333	0	TKS07200.1(hypothetical protein D5086_0000115320 [Populus alba])
MSTRG.11040			389	0	0	0	8	0	0	0	3	0	0	0	7	0	0	0	0	0	0	2	0	0	0	9	0	0	0	8	0	0	6	0	0	0	0	6.3333	0
MSTRG.11053			336	17	1	10	10	8	3	9	11	21	1	9	6	1	2	1	3	5	11	2	13	1	12	5	13	1	16	3	15.3333	1.6667	9	9.3333	1.3333	9.6667	2.3333	3.3333	13
MSTRG.11059			2432	0	0	0	0.01	0	0	0	22.39	0	0	0	0	0	0	4.22	0	0	0	0	0	0	1.98	1.87	0	0	0	262.51	0	0	7.4667	0	1.4067	0	0	88.1267	0.66	XP_002307739.2(protein ALP1-like [Populus trichocarpa])					ENOG411206Y(S:Function unknown)	ENOG411206Y(-)	PF13359.6(DDE_Tnp_4:DDE superfamily endonuclease); PF07941.11(K_channel_TID:Potassium channel Kv1.4 tandem inactivation domain)	sp|Q9M2U3|ALPL_ARATH(Protein ALP1-like OS=Arabidopsis thaliana OX=3702 GN=At3g55350 PE=2 SV=1)
MSTRG.11060			2432	2302	1042	973	1630.99	2179	308	891	1246.61	1136	550	2593	831	24	26	22.78	1208	138	181	473	335	136	123.02	602.13	332	53	108	3604.49	1872.33	633.333	1236.2	1485.67	24.26	625	109	1559.87	137.34	XP_002307739.2(protein ALP1-like [Populus trichocarpa])					ENOG411206Y(S:Function unknown)	ENOG411206Y(transposon protein)	PF13359.6(DDE_Tnp_4:DDE superfamily endonuclease); PF07941.11(K_channel_TID:Potassium channel Kv1.4 tandem inactivation domain)	sp|Q9M2U3|ALPL_ARATH(Protein ALP1-like OS=Arabidopsis thaliana OX=3702 GN=At3g55350 PE=2 SV=1)
MSTRG.11071			1699	57	32	52	61	47	45	89	54.14	65	56	57	87	71	76	74	47	67	68	85	61	83	94	72	66	69	88	72	56.3333	44.3333	67.38	66	73.6667	58	73	76.3333	83.3333	PNT38523.1(hypothetical protein POPTR_005G243900 [Populus trichocarpa])					ENOG4111FVG(S:Function unknown)	ENOG4111FVG(family with sequence similarity 206, member A)		sp|Q29S16|ABITM_BOVIN(Protein Abitram OS=Bos taurus OX=9913 GN=ABITRAM PE=2 SV=1)
MSTRG.11081			1123	16	8	14	9	8	13	10	12	13	9	15	8	8	4	11	8	9	14	8	9	15	12	10	14	10	10	10	12.3333	10	9.6667	13	7.6667	10.3333	11.3333	9.3333	12	TKS03217.1(putative translation initiation family protein [Populus alba])	GO:0000455(biological_process:enzyme-directed rRNA pseudouridine synthesis); GO:0001522(biological_process:pseudouridine synthesis); GO:0003723(molecular_function:RNA binding); GO:0009982(molecular_function:pseudouridine synthase activity)	K06180	rluD		COG0564(J:Translation, ribosomal structure and biogenesis)	COG0564(pseudouridine synthase activity)		sp|Q3ECD0|PUS2_ARATH(RNA pseudouridine synthase 2, chloroplastic OS=Arabidopsis thaliana OX=3702 GN=At1g76050 PE=2 SV=1)
MSTRG.11109			474	11	10	1	4	1	3	8	5	7	5	4	10	5	2	7	10	10	4	6	7	5	4	8	10	9	6	4	6.3333	6	6.3333	4.3333	4.6667	9	8	6	4.6667	ABK92663.1(unknown [Populus trichocarpa])	GO:0016021(cellular_component:integral component of membrane); GO:0005739(cellular_component:mitochondrion)				ENOG410Z6EX(S:Function unknown)	ENOG410Z6EX(-)
MSTRG.11113			1280	46	32	55	48	46	42	67	53	64	30	53	58	45	50	41	40	34	66	58	56	36	56	73	62	56	55	47	52	34.6667	53	58.3333	45.3333	52.6667	42	59.3333	59	RQO91034.1(hypothetical protein POPTR_005G248201 [Populus trichocarpa])	GO:0008168(molecular_function:methyltransferase activity); GO:0005634(cellular_component:nucleus); GO:0016491(molecular_function:oxidoreductase activity); GO:0001716(molecular_function:L-amino-acid oxidase activity); GO:0003677(molecular_function:DNA binding)	K11450	KDM1A, AOF2, LSD1	map04714(Thermogenesis)	ENOG410XSNC(S:Function unknown); ENOG410ZF69(S:Function unknown)	ENOG410XSNC(dehydrin); ENOG410ZF69(-)	PF01593.24(Amino_oxidase:Flavin containing amine oxidoreductase)	sp|Q8VXV7|LDL1_ARATH(Lysine-specific histone demethylase 1 homolog 1 OS=Arabidopsis thaliana OX=3702 GN=LDL1 PE=1 SV=1)
MSTRG.11114			1101	17	7	33	16	19	18	23	26	29	20	8	13	20	15	17	25	15	26	21	19	22	19	32	29	19	31	23	21.6667	15	18.3333	21.3333	17.3333	24.3333	18.6667	25.3333	25.3333	XP_002300664.1(lysine-specific histone demethylase 1 homolog 1 [Populus trichocarpa] )	GO:0001716(molecular_function:L-amino-acid oxidase activity); GO:0005634(cellular_component:nucleus); GO:0003677(molecular_function:DNA binding); GO:0016575(biological_process:histone deacetylation); GO:0048364(biological_process:root development); GO:0051568(biological_process:histone H3-K4 methylation); GO:0008168(molecular_function:methyltransferase activity); GO:0016491(molecular_function:oxi…	K11450	KDM1A, AOF2, LSD1	map04714(Thermogenesis)	ENOG410ZF69(S:Function unknown); ENOG410XSNC(S:Function unknown)	ENOG410ZF69(-); ENOG410XSNC(-)	PF04433.17(SWIRM:SWIRM domain); PF01593.24(Amino_oxidase:Flavin containing amine oxidoreductase); PF13450.6(NAD_binding_8:NAD(P)-binding Rossmann-like domain)	sp|Q8VXV7|LDL1_ARATH(Lysine-specific histone demethylase 1 homolog 1 OS=Arabidopsis thaliana OX=3702 GN=LDL1 PE=1 SV=1)
MSTRG.11188			226	0	0	0	2	0	0	2	2	0	1	1	1	0	0	0	1	0	0	1	0	0	0	1	0	1	0	0	0	0.3333	1.6667	1	0	0.3333	0.3333	0.6667	0	RVW28823.1(Retrovirus-related Pol polyprotein from transposon TNT 1-94 [Vitis vinifera])	GO:0005618(cellular_component:cell wall); GO:0003676(molecular_function:nucleic acid binding); GO:0000943(cellular_component:retrotransposon nucleocapsid); GO:0016021(cellular_component:integral component of membrane); GO:0048046(cellular_component:apoplast); GO:0015074(biological_process:DNA integration); GO:0008270(molecular_function:zinc ion binding); GO:0016762(molecular_function:xyloglucan:x…
MSTRG.11204			354	1	1	0	1	0	1	0	0	0	0	2	2	3	1	3	0	1	2	2	1	1	1	2	2	3	1	3	0.3333	0.6667	1	0.6667	2.3333	1	1.6667	2.3333	1.3333
MSTRG.11208			228	0	0	1	0	0	0	1	0	1	5	1	0	1	2	2	0	4	4	0	0	2	0	0	1	0	3	0	0.3333	1.6667	0	1	1.6667	0.3333	2	0	2.3333
MSTRG.11210			748	19	28	32	28	20	44	32	44	24	35	33	35	48	46	52	23	53	52	37	20	44	42	29	23	45	27	39	21	35.6667	35.6667	32.3333	48.6667	22	47.3333	35	40.3333	TKR68850.1(U5 small nuclear ribonucleoprotein helicase [Populus alba])	GO:0003676(molecular_function:nucleic acid binding); GO:0005524(molecular_function:ATP binding); GO:0004386(molecular_function:helicase activity)	K12854	SNRNP200, BRR2	map03040(Spliceosome)	COG1204(L:Replication, recombination and repair)	COG1204(helicase)		sp|Q9SYP1|DEXHC_ARATH(DExH-box ATP-dependent RNA helicase DExH12 OS=Arabidopsis thaliana OX=3702 GN=BRR2A PE=1 SV=1)
MSTRG.11211			1173	25	20	28	21	18	16	45	17	21	23	41	19	48	39	62	34	59	33	49	15	37	37	28	32	44	26	21	21.3333	19.6667	19	38	49.6667	27	46.6667	32.6667	32	XP_021646390.1(DExH-box ATP-dependent RNA helicase DExH12-like [Hevea brasiliensis] )	GO:0003676(molecular_function:nucleic acid binding); GO:0005524(molecular_function:ATP binding); GO:0004386(molecular_function:helicase activity)	K12854	SNRNP200, BRR2	map03040(Spliceosome)	COG1204(L:Replication, recombination and repair)	COG1204(helicase)		sp|Q9SYP1|DEXHC_ARATH(DExH-box ATP-dependent RNA helicase DExH12 OS=Arabidopsis thaliana OX=3702 GN=BRR2A PE=1 SV=1)
MSTRG.11221			214	0	0	0	2	2	0	0	0	0	2	0	0	2	0	2	0	0	1	0	1	0	0	1	0	0	0	1	0.6667	0.6667	0.6667	0	1.3333	0.3333	0	0.6667	0.3333	XP_024456403.1(uncharacterized protein LOC18099719 isoform X3 [Populus trichocarpa])					COG0432(S:Function unknown)	COG0432(Secondary thiamine-phosphate synthase enzyme)	PF01894.17(UPF0047:Uncharacterised protein family UPF0047)
MSTRG.11225			370	13.4	22.44	19.54	6.33	8.34	12.43	11.45	13.84	11.03	18.81	8.98	6.21	17.34	13.87	27.94	11.97	27.2	6.23	11.56	17.42	20.6	14.23	11.63	10.19	31.49	11	4.2	10.9233	17.8933	8.7933	13.3233	19.7167	13.1933	26.43	9.13	10.4867	XP_011005534.1(PREDICTED: LOW QUALITY PROTEIN: uncharacterized protein LOC105111782 [Populus euphratica])	GO:0000943(cellular_component:retrotransposon nucleocapsid); GO:0016021(cellular_component:integral component of membrane); GO:0015074(biological_process:DNA integration); GO:0008270(molecular_function:zinc ion binding); GO:0003676(molecular_function:nucleic acid binding); GO:0004970(molecular_function:ionotropic glutamate receptor activity)				ENOG4111WQF(S:Function unknown); ENOG410XS4D(S:Function unknown); COG2801(L:Replication, recombination and repair)	ENOG4111WQF(-); ENOG410XS4D(Retrotransposon protein); COG2801(Retrotransposon protein)	PF07727.14(RVT_2:Reverse transcriptase (RNA-dependent DNA polymerase))	sp|P10978|POLX_TOBAC(Retrovirus-related Pol polyprotein from transposon TNT 1-94 OS=Nicotiana tabacum OX=4097 PE=2 SV=1)
MSTRG.11241			943	426.97	391	804	674	394	363	627	582	443	359.35	591	754	399	376	355	403.47	420	707	644	343	396	657.5	676	392.44	366	582	521	421.323	371.117	670	674	376.667	379.637	394	613.667	648.833	XP_002308739.1(ras-related protein RABB1c [Populus trichocarpa] )	GO:0032482(biological_process:Rab protein signal transduction); GO:0006886(biological_process:intracellular protein transport); GO:0003924(molecular_function:GTPase activity); GO:0005794(cellular_component:Golgi apparatus); GO:0005525(molecular_function:GTP binding)	K07877	RAB2A		COG1100(S:Function unknown)	COG1100(Enhancer of mRNA decapping 4)	PF00071.22(Ras:Ras family); PF08477.13(Roc:Ras of Complex, Roc, domain of DAPkinase); PF00025.21(Arf:ADP-ribosylation factor family); PF01926.23(MMR_HSR1:50S ribosome-binding GTPase); PF00009.27(GTP_EFTU:Elongation factor Tu GTP binding domain)	sp|P92963|RAB1C_ARATH(Ras-related protein RABB1c OS=Arabidopsis thaliana OX=3702 GN=RABB1C PE=1 SV=1)
MSTRG.11242			279	0	0	0	35.41	0	0	0	28.34	0	0	0	27.04	0	0	0	0	0	0	20.03	0	4	0	22.53	0	0	1	19.35	0	0	30.2633	0	0	0	1.3333	20.6367	0.3333	XP_024456440.1(uncharacterized protein LOC112327482 [Populus trichocarpa])							PF00098.23(zf-CCHC:Zinc knuckle)
MSTRG.11246			1036	8.23	10.08	7.6	244.65	6.21	13.22	13.51	174.66	13.85	14.24	7.76	214.11	14.37	12.81	10.37	11.83	13.88	9.92	227.32	8.33	21.99	8.12	195.66	15.97	19.27	7.69	233.25	9.43	12.5133	211.14	9.6233	12.5167	12.0433	18.38	218.743	8.5767	XP_024456440.1(uncharacterized protein LOC112327482 [Populus trichocarpa])							PF14223.6(Retrotran_gag_2:gag-polypeptide of LTR copia-type); PF13961.6(DUF4219:Domain of unknown function (DUF4219)); PF00098.23(zf-CCHC:Zinc knuckle)
MSTRG.11247			369	4.4	1.1	0	114.43	4.37	3.34	3	96.38	0.99	3.45	1	82.38	1.28	0.57	6.24	5.87	10.49	0	65.96	1.13	3.94	0	91.21	1.14	3.05	1.07	102.52	3.2533	2.63	97.73	1.3333	2.6967	2.7133	5.8267	86.5633	0.3567	ADN34143.1(copia-type polyprotein [Cucumis melo subsp. melo])	GO:0004491(molecular_function:methylmalonate-semialdehyde dehydrogenase (acylating) activity); GO:0000943(cellular_component:retrotransposon nucleocapsid); GO:0016301(molecular_function:kinase activity); GO:0015074(biological_process:DNA integration); GO:0008270(molecular_function:zinc ion binding); GO:0003676(molecular_function:nucleic acid binding); GO:0003964(molecular_function:RNA-directed DN…				COG2801(L:Replication, recombination and repair); ENOG410ZXEB(S:Function unknown)	COG2801(Retrotransposon protein); ENOG410ZXEB(Integrase core domain)		sp|P10978|POLX_TOBAC(Retrovirus-related Pol polyprotein from transposon TNT 1-94 OS=Nicotiana tabacum OX=4097 PE=2 SV=1)
MSTRG.11248			666	6.13	2	5	59.01	3.02	9	10	38.08	6	8.03	11.11	68.24	14	7.58	11.01	7.05	17	12.09	29	9	6.81	7	13	18.01	10	10	43	5.05	6.3433	55.11	8.7033	10.8633	11.3533	11.27	28.3333	9.6967	ABF81447.1(NBS type disease resistance protein [Populus trichocarpa])	GO:0000015(cellular_component:phosphopyruvate hydratase complex); GO:0043531(molecular_function:ADP binding); GO:0000943(cellular_component:retrotransposon nucleocapsid); GO:0016021(cellular_component:integral component of membrane); GO:0000287(molecular_function:magnesium ion binding); GO:0004634(molecular_function:phosphopyruvate hydratase activity); GO:0003887(molecular_function:DNA-directed D…				COG2801(L:Replication, recombination and repair); ENOG410XS4D(S:Function unknown)	COG2801(Retrotransposon protein); ENOG410XS4D(Retrotransposon protein)	PF07727.14(RVT_2:Reverse transcriptase (RNA-dependent DNA polymerase))	sp|Q9ZT94|POLR2_ARATH(Retrovirus-related Pol polyprotein from transposon RE2 OS=Arabidopsis thaliana OX=3702 GN=RE2 PE=4 SV=1)
MSTRG.113			618	0	3.33	0	1	1.33	1	0	0	1.23	2.22	0	0	5.58	2.21	5.15	3.15	4.93	0	0	2.21	6.69	0	0	0	7.79	1.07	0	0.8533	2.1833	0.3333	0	4.3133	1.7867	6.47	0	0.3567	PNT52138.1(hypothetical protein POPTR_001G014500 [Populus trichocarpa])	GO:0006468(biological_process:protein phosphorylation); GO:0016021(cellular_component:integral component of membrane); GO:0004672(molecular_function:protein kinase activity); GO:0030246(molecular_function:carbohydrate binding); GO:0004674(molecular_function:protein serine/threonine kinase activity); GO:0005886(cellular_component:plasma membrane); GO:0005524(molecular_function:ATP binding)				ENOG410YBN4(T:Signal transduction mechanisms); COG0515(T:Signal transduction mechanisms)	ENOG410YBN4(G-type lectin S-receptor-like serine threonine-protein kinase); COG0515(G-type lectin S-receptor-like serine threonine-protein kinase)	PF01453.24(B_lectin:D-mannose binding lectin)	sp|Q25AG3|LERK3_ORYSI(G-type lectin S-receptor-like serine/threonine-protein kinase LECRK3 OS=Oryza sativa subsp. indica OX=39946 GN=LECRK3 PE=3 SV=2)
MSTRG.1130			552	13	15	5	25	18	8	7	29	11	8	4	25	8	14	8	14	18	8	30	8	2	5	31	5	6	8	26	14	10.3333	26.3333	5.3333	10	9	8.6667	29	7
MSTRG.11302			836	19	7	10	19	13	19	11	28	9	26	15	10	19	17	18	30	31	28	20	10	18	23	12	12	40	14	14	13.6667	17.3333	19	12	18	17.3333	29.6667	15.3333	21.6667
MSTRG.11384			3427	255	306	304	370	221	363	316	292	272.44	348	296	354	316	359	382	211	387	300	419	229	293	314	419	272	384	326	332	249.48	339	338.667	305.333	352.333	237.333	354.667	390	313.333	XP_006380932.1(uncharacterized protein LOC18099776 [Populus trichocarpa] )	GO:0046983(molecular_function:protein dimerization activity); GO:0003677(molecular_function:DNA binding)				ENOG410XWK2(S:Function unknown)	ENOG410XWK2(-)	PF04937.15(DUF659:Protein of unknown function (DUF 659)); PF02892.15(zf-BED:BED zinc finger); PF05699.14(Dimer_Tnp_hAT:hAT family C-terminal dimerisation region)
MSTRG.11414			232	3	2	1	2	0	0	2	0	2	0	2	2	0	1	0	2	0	0	1	2	0	0	0	0	2	4	2	1.6667	0.6667	1.3333	1.6667	0.3333	1.3333	0.6667	1	1.3333
MSTRG.11461			285	0	0	2	0	0	0	3	0	0	0	2	0	0	0	1	0	0	3	0	0	0	2	0	4	0	2	0	0	0	0	2.3333	0.3333	1.3333	0	0	2.3333	XP_011041412.1(PREDICTED: probable LRR receptor-like serine/threonine-protein kinase At3g47570 [Populus euphratica])	GO:0004674(molecular_function:protein serine/threonine kinase activity); GO:0016021(cellular_component:integral component of membrane); GO:0005524(molecular_function:ATP binding); GO:0004672(molecular_function:protein kinase activity)				COG4886(A:RNA processing and modification)	COG4886(Polyglutamine binding protein 1)	PF07714.17(Pkinase_Tyr:Protein tyrosine kinase); PF00069.25(Pkinase:Protein kinase domain)	sp|C0LGT6|EFR_ARATH(LRR receptor-like serine/threonine-protein kinase EFR OS=Arabidopsis thaliana OX=3702 GN=EFR PE=1 SV=1)
MSTRG.11489			507	5	1	29	35	4	0	90	19	5	0	66	20	0	6	1	5	0	133	47	4	5	130	41	12	0	146	25	4.6667	0.3333	24.6667	61.6667	2.3333	7	1.6667	37.6667	136.333
MSTRG.11496			561	2	1	1	4	2	3	5	5	3	0	2	7	2	3	3	1	4	6	7	1	6	3	8	11	5	2	8	2.3333	1.3333	5.3333	2.6667	2.6667	4.3333	5	7.6667	3.6667	TKR97859.1(nucleolar protein 10 [Populus alba])	GO:0005634(cellular_component:nucleus)	K14788	NOL10, ENP2		ENOG410XQ2D(S:Function unknown)	ENOG410XQ2D(Nucleolar protein)
MSTRG.11530			567	4	1	1	9	0	2	9	10	0	0	5	10	1	4	2	2	2	3	11	2	0	12	9	8	0	3	6	1.3333	1	9.6667	5	2.3333	4	0.6667	8.6667	6	RQO91263.1(hypothetical protein POPTR_006G041301 [Populus trichocarpa])	GO:0005737(cellular_component:cytoplasm); GO:0016846(molecular_function:carbon-sulfur lyase activity); GO:0019346(biological_process:transsulfuration); GO:0004121(molecular_function:cystathionine beta-lyase activity); GO:0071266(biological_process:'de novo' L-methionine biosynthetic process); GO:0003824(molecular_function:catalytic activity); GO:0030170(molecular_function:pyridoxal phosphate bind…	K01760	metC	map00270(Cysteine and methionine metabolism); map00450(Selenocompound metabolism)	COG0626(S:Function unknown)	COG0626(plant-specific domain TIGR01589 family protein)		sp|P53780|METC_ARATH(Cystathionine beta-lyase, chloroplastic OS=Arabidopsis thaliana OX=3702 GN=At3g57050 PE=1 SV=1)
MSTRG.11625			207	0	0	0	2	0	0	0	1	0	0	0	5	0	0	0	0	0	0	1	0	0	0	6	0	0	0	7	0	0	2.6667	0	0	0	0	4.6667	0
MSTRG.11634			242	0	0	0	0	0	0	0	0	1	0	0	0	0	0	0	0	0	0	0	0	0	0	0	0	0	0	0	0.3333	0	0	0	0	0	0	0	0
MSTRG.1166			238	0	0	0	1	0	0	0	2	0	0	0	0	0	0	0	0	0	0	0	1	0	0	2	0	2	1	1	0	0	1	0	0	0.3333	0.6667	1	0.3333
MSTRG.11688			293	1	0	0	0	1	5	1	0	1	1	0	0	1	2	3	2	1	0	0	3	0	0	0	0	2	1	0	1	2	0	0.3333	2	1.6667	1	0	0.3333
MSTRG.11690			525	122	63	52	62	95	69	19	68	67	56	41	75	7	14	13	67	58	12	96	58	31	23	85	51	31	22	106	94.6667	62.6667	68.3333	37.3333	11.3333	58.6667	40	95.6667	19
MSTRG.11711			3652	255.21	266	312.24	490.61	219	295	318.45	438	333	377	420	437.31	423	460	441	352	392	420	558.6	313	406	440.47	572	499	379.48	387	446	269.07	312.667	455.307	350.23	441.333	388	392.493	525.533	415.823	XP_006381094.2(uncharacterized protein LOC18099908 isoform X3 [Populus trichocarpa])	GO:0008270(molecular_function:zinc ion binding)				ENOG41113FM(S:Function unknown)	ENOG41113FM(MULE transposase domain)	PF03108.15(DBD_Tnp_Mut:MuDR family transposase); PF10551.9(MULE:MULE transposase domain); PF04434.17(SWIM:SWIM zinc finger); PF00564.24(PB1:PB1 domain); PF00872.18(Transposase_mut:Transposase, Mutator family)
MSTRG.11717			267	0	0	0	0	0	0	0	0	0	0	0	0	1	0	0	0	0	0	0	0	0	0	0	0	0	0	0	0	0	0	0	0.3333	0	0	0	0
MSTRG.11741			1045	2	1	6	14	4	1	14	24	7	2	10	17	7	5	6	4	5	14	12	13	10	24	24	7	9	33	8	4.3333	1.3333	18.3333	10	6	8	8	14.6667	23.6667	ABK94465.1(unknown [Populus trichocarpa])
MSTRG.11742			1529	9	6	13	7	21	10	12	19	12	12	15	9	9	24	10	35	30	25	13	29	16	25	11	22	15	20	9	14	9.3333	11.6667	13.3333	14.3333	28.6667	20.3333	11	23.3333
MSTRG.11763			1096	5	0	2	9	1	5	10	13	9	2	5	1	2	0	0	3	1	3	6	3	0	10	13	7	3	4	10	5	2.3333	7.6667	5.6667	0.6667	4.3333	1.3333	9.6667	5.6667	XP_011020362.1(PREDICTED: uncharacterized protein LOC105122772 [Populus euphratica])					ENOG410Z0NK(S:Function unknown)	ENOG410Z0NK(-)
MSTRG.11792			223	0	0	0	0	0	0	1	0	0	1	0	0	1	0	1	1	0	0	1	0	0	0	0	3	0	0	0	0	0.3333	0	0.3333	0.6667	1.3333	0	0.3333	0	TKR97698.1(hypothetical protein D5086_0000209930 [Populus alba])					ENOG41114A5(S:Function unknown); ENOG410YNEJ(K:Transcription)	ENOG41114A5(-); ENOG410YNEJ(Oxygenase that can act as both a histone lysine demethylase and a ribosomal histidine hydroxylase. Specifically demethylates 'Lys-4' (H3K4me) and 'Lys-36' (H3K36me) of histone H3, thereby playing a central role in histone code)
MSTRG.11974			223	1	0	2.99	0	3.99	3	2.01	0	2.87	1	3	0	3.01	0	2	3.36	2.39	1	0	0	1	2.99	0	2.03	1	2	0	2.62	1.3333	0	2.6667	1.67	1.7967	1.4633	0	1.9967
MSTRG.11980			839	26.04	32.01	5	3	30.02	36.04	9	2	43	41.24	14	4.01	56.06	53.03	64.06	69.02	88.09	14.02	2	47.04	62.02	20.05	5	27	76.04	8.01	3	33.02	36.43	3.0033	9.3333	57.7167	47.6867	75.3833	3.3333	14.0267	XP_015897084.1(fructose-1,6-bisphosphatase, chloroplastic-like [Ziziphus jujuba])	GO:0005737(cellular_component:cytoplasm); GO:0042132(molecular_function:fructose 1,6-bisphosphate 1-phosphatase activity); GO:0005975(biological_process:carbohydrate metabolic process); GO:0005829(cellular_component:cytosol); GO:0030388(biological_process:fructose 1,6-bisphosphate metabolic process); GO:0005986(biological_process:sucrose biosynthetic process); GO:0006000(biological_process:fructo…	K03841	FBP, fbp	map00010(Glycolysis / Gluconeogenesis); map00030(Pentose phosphate pathway); map00051(Fructose and mannose metabolism); map00710(Carbon fixation in photosynthetic organisms)	COG0158(S:Function unknown)	COG0158(sphingomyelin synthase)		sp|Q07204|F16P1_BRANA(Fructose-1,6-bisphosphatase, chloroplastic OS=Brassica napus OX=3708 GN=FBP PE=2 SV=1)
MSTRG.1200			248	0	1	1	0	0	0	1	2	0	0	1	0	0	0	0	0	0	3	0	0	0	2	0	2	0	0	2	0	0.3333	0.6667	1	0	0.6667	0	0.6667	1.6667	XP_021639285.1(uncharacterized protein LOC110634544 [Hevea brasiliensis])	GO:0000943(cellular_component:retrotransposon nucleocapsid); GO:0015074(biological_process:DNA integration); GO:0003676(molecular_function:nucleic acid binding)							sp|Q94HW2|POLR1_ARATH(Retrovirus-related Pol polyprotein from transposon RE1 OS=Arabidopsis thaliana OX=3702 GN=RE1 PE=2 SV=1)
MSTRG.12006			318	4	0	3	1	1	1	5	1	1	2	3	1	4	3	0	1	2	9	4	7	1	7	0	5	1	17	0	2	1	1	3.6667	2.3333	4.3333	1.3333	1.3333	11
MSTRG.12016			611	0	8	4	4	2	2	3	1	3	0	4	1	2	2	5	6	5	4	1	3	6	9	0	5	4	7	2	1.6667	3.3333	2	3.6667	3	4.6667	5	1	6.6667	XP_024459981.1(uncharacterized protein LOC112328022 isoform X1 [Populus trichocarpa] )
MSTRG.12017			1245	16	0	0	0	0	0	0	0	15	0	0	0	0	0	0	0	0	0	0	0	0	0	0	1	0	0	0	10.3333	0	0	0	0	0.3333	0	0	0	PNT30773.1(hypothetical protein POPTR_006G099000, partial [Populus trichocarpa])
MSTRG.12078			353	93	80	137	195	97	117	128	154	90	104	139	161	65	47	32	112	88	185	232	96	141	278	242	131	106	167	201	93.3333	100.333	170	134.667	48	113	111.667	225	210	PNT30902.1(hypothetical protein POPTR_006G106700 [Populus trichocarpa])
MSTRG.12111			558	12	0	0	0	2	0	0	0	14	0	0	0	0	0	0	0	0	0	0	0	0	0	0	0	0	0	0	9.3333	0	0	0	0	0	0	0	0
MSTRG.12133			561	1	3	5	3	0	3	4	3	5	0	3	6	7	3	3	5	7	6	6	2	6	5	4	5	4	3	2	2	2	4	4	4.3333	4	5.6667	4	4.6667
MSTRG.12135			236	0	1	0	0	1	0	0	1	1	0	0	0	0	0	0	1	0	0	0	1	0	0	0	3	0	1	0	0.6667	0.3333	0.3333	0	0	1.6667	0	0	0.3333
MSTRG.12190			312	0	2	0	0	0	0	0	2	1	0	1	0	3	0	1	1	1	0	3	1	1	1	5	3	1	0	1	0.3333	0.6667	0.6667	0.3333	1.3333	1.6667	1	3	0.3333	ABK92627.1(unknown [Populus trichocarpa] )
MSTRG.12201			267	1	0	1	0	0	0	0	0	0	0	1	0	0	0	0	0	1	0	0	0	0	0	0	0	0	0	1	0.3333	0	0	0.6667	0	0	0.3333	0.3333	0
MSTRG.12208			240	1	7	0	0	1	15	0	0	4	5	1	0	0	0	2	3	1	0	0	1	3	0	0	2	1	0	0	2	9	0	0.3333	0.6667	2	1.6667	0	0
MSTRG.12250			431	1	0	0	1	0	0	0	0	1	1	0	0	3	1	2	1	0	0	1	0	0	0	0	1	0	0	0	0.6667	0.3333	0.3333	0	2	0.6667	0	0.3333	0	RXI01268.1(hypothetical protein DVH24_001502 [Malus domestica])					ENOG410YCM9(S:Function unknown)	ENOG410YCM9(BTB POZ domain-containing protein)		sp|Q9LYW0|Y5325_ARATH(BTB/POZ domain-containing protein At5g03250 OS=Arabidopsis thaliana OX=3702 GN=At5g03250 PE=2 SV=1)
MSTRG.12252			309	0	0	0	0	0	0	0	0	0	0	0	0	0	0	0	0	0	0	1	0	0	0	2	1	0	0	0	0	0	0	0	0	0.3333	0	1	0
MSTRG.12280			355	22	27	13	21	21	18	19	5	9	31	22	12	25	23	21	19	24	29	12	10	27	32	20	34	22	12	5	17.3333	25.3333	12.6667	18	23	21	24.3333	12.3333	24.3333	TKS13121.1(hypothetical protein D5086_0000054340 [Populus alba])	GO:0005737(cellular_component:cytoplasm); GO:0008139(molecular_function:nuclear localization sequence binding); GO:0005643(cellular_component:nuclear pore); GO:0005829(cellular_component:cytosol); GO:0006606(biological_process:protein import into nucleus); GO:0006607(biological_process:NLS-bearing protein import into nucleus); GO:0005654(cellular_component:nucleoplasm); GO:0061608(molecular_funct…				COG5064(I:Lipid transport and metabolism)	COG5064(PHOsphatase)		sp|F4KF65|IMPA9_ARATH(Importin subunit alpha-9 OS=Arabidopsis thaliana OX=3702 GN=IMPA9 PE=3 SV=1)
MSTRG.12281			544	18	9	10	10	14	24	14	8	18	10	13	5	12	11	17	20	21	9	7	15	9	11	7	9	13	17	7	16.6667	14.3333	7.6667	12.3333	13.3333	14.6667	14.3333	7	12.3333	XP_024458306.1(importin subunit alpha-9 [Populus trichocarpa])	GO:0005737(cellular_component:cytoplasm); GO:0008139(molecular_function:nuclear localization sequence binding); GO:0005643(cellular_component:nuclear pore); GO:0005829(cellular_component:cytosol); GO:0006606(biological_process:protein import into nucleus); GO:0006607(biological_process:NLS-bearing protein import into nucleus); GO:0005654(cellular_component:nucleoplasm); GO:0061608(molecular_funct…				COG5064(I:Lipid transport and metabolism)	COG5064(PHOsphatase)	PF00514.23(Arm:Armadillo/beta-catenin-like repeat)	sp|F4KF65|IMPA9_ARATH(Importin subunit alpha-9 OS=Arabidopsis thaliana OX=3702 GN=IMPA9 PE=3 SV=1)
MSTRG.12282			261	1	0	0	0	0	0	0	0	0	0	0	0	0	0	0	1	1	0	0	0	0	0	1	0	0	0	0	0.3333	0	0	0	0	0.3333	0.3333	0.3333	0
MSTRG.12305			263	3	1	0	0	0	1	0	0	4	0	0	0	1	0	0	0	0	0	0	0	1	0	0	0	6	0	0	2.3333	0.6667	0	0	0.3333	0	2.3333	0	0
MSTRG.12327			252	7	4	4	9	12	7	8	2	3	3	4	12	11	4	5	12	3	4	8	6	9	11	5	7	8	8	9	7.3333	4.6667	7.6667	5.3333	6.6667	8.3333	6.6667	7.3333	7.6667	PNT31528.1(hypothetical protein POPTR_006G136100 [Populus trichocarpa])	GO:0016021(cellular_component:integral component of membrane)
MSTRG.12352			379	0	6	12	2	1	6	11	9	1	5	2	5	5	7	6	7	12	5	8	4	4	7	6	5	6	4	1	0.6667	5.6667	5.3333	8.3333	6	5.3333	7.3333	5	5.3333	TKS13058.1(hypothetical protein D5086_0000053710 [Populus alba])
MSTRG.12362			665	25	17	6	11	7	10	2	7	21	11	4	5	8	22	21	25	8	4	10	14	7	6	16	13	4	4	7	17.6667	12.6667	7.6667	4	17	17.3333	6.3333	11	4.6667
MSTRG.12401			221	2.12	0	0.22	3.75	1.35	0.29	0	1.58	3.83	0.99	4.7	0	0.68	4.35	0	0	0	2.73	2.15	0.59	0	2.71	0.99	0.27	5.5	5.45	0.63	2.4333	0.4267	1.7767	1.64	1.6767	0.2867	1.8333	1.2567	3.63	XP_024447864.1(zinc finger BED domain-containing protein RICESLEEPER 2 [Populus trichocarpa])					ENOG410ZT99(S:Function unknown); ENOG4111T8J(S:Function unknown)	ENOG410ZT99(Pfam:hATC); ENOG4111T8J(transposon protein)	PF14372.6(DUF4413:Domain of unknown function (DUF4413))
MSTRG.12443			527	7.98	2.11	4.52	1	0	1.86	7.24	0	0.37	2.52	4.04	0	5.99	14.27	14.74	6.58	8.71	2	1.75	3.57	14.06	5.87	1.01	1	3.85	3.62	0	2.7833	2.1633	0.3333	5.2667	11.6667	3.7167	8.8733	0.92	3.83	KYP76423.1(Retrovirus-related Pol polyprotein from transposon TNT 1-94, partial [Cajanus cajan])	GO:0016818(molecular_function:hydrolase activity, acting on acid anhydrides, in phosphorus-containing anhydrides); GO:0006281(biological_process:DNA repair); GO:0000943(cellular_component:retrotransposon nucleocapsid); GO:0015074(biological_process:DNA integration); GO:0008270(molecular_function:zinc ion binding); GO:0003676(molecular_function:nucleic acid binding); GO:0003677(molecular_function:…	K03006	RPB1, POLR2A	map00240(Pyrimidine metabolism); map03020(RNA polymerase); map00230(Purine metabolism)				sp|P10978|POLX_TOBAC(Retrovirus-related Pol polyprotein from transposon TNT 1-94 OS=Nicotiana tabacum OX=4097 PE=2 SV=1)
MSTRG.12463			454	1	0	1	0	1	5	0	0	1	1	0	0	5	3	3	1	4	0	0	0	8	1	0	1	7	1	0	1	2	0	0.3333	3.6667	0.6667	6.3333	0	0.6667	PNT31852.1(hypothetical protein POPTR_006G152400 [Populus trichocarpa])					ENOG4111K5V(S:Function unknown)	ENOG4111K5V(Reverse transcriptase (RNA-dependent DNA polymerase))
MSTRG.12506			412	1	3	1	3	1	2	6	3	1	3	2	6	3	3	7	3	0	4	2	0	6	1	2	7	4	2	2	1	2.6667	4	3	4.3333	3.3333	3.3333	2	2.3333
MSTRG.12520			701	21	79	1	10	15	108.02	0	18	17	115.04	0	24	99.99	49.09	127.06	42	205.04	0	18	13.03	173.45	3	14	10	159.02	1	24	17.6667	100.687	17.3333	0.3333	92.0467	21.6767	179.17	18.6667	1.3333	XP_024948175.1(uncharacterized protein LOC112495731, partial [Citrus sinensis])	GO:0010581(biological_process:regulation of starch biosynthetic process); GO:0015074(biological_process:DNA integration); GO:0008270(molecular_function:zinc ion binding); GO:0003676(molecular_function:nucleic acid binding); GO:0019252(biological_process:starch biosynthetic process); GO:0009507(cellular_component:chloroplast)				COG2801(L:Replication, recombination and repair)	COG2801(Retrotransposon protein)	PF00665.26(rve:Integrase core domain)	sp|Q7LHG5|YI31B_YEAST(Transposon Ty3-I Gag-Pol polyprotein OS=Saccharomyces cerevisiae (strain ATCC 204508 / S288c) OX=559292 GN=TY3B-I PE=3 SV=2)
MSTRG.12524			497	0	0	0	4	0	0	0	5	0	0	0	6	0	0	0	0	0	0	1	0	0	0	7	0	0	0	6	0	0	5	0	0	0	0	4.6667	0	TKS10732.1(hypothetical protein D5086_0000080680 [Populus alba])		K10664	ATL6S		ENOG41121N2(S:Function unknown)	ENOG41121N2(Protein of unknown function, DUF538)		sp|Q5XF85|ATL42_ARATH(E3 ubiquitin-protein ligase ATL42 OS=Arabidopsis thaliana OX=3702 GN=ATL42 PE=1 SV=2)
MSTRG.12527			512	1	0	0	0	0	0	0	0	1	0	0	0	1	0	0	0	0	0	1	0	0	0	0	0	0	0	0	0.6667	0	0	0	0.3333	0	0	0.3333	0	AKF33939.1(Ycf1 (chloroplast) [Populus cathayana])	GO:0015031(biological_process:protein transport); GO:0016021(cellular_component:integral component of membrane); GO:0009706(cellular_component:chloroplast inner membrane)				ENOG4112D2K(S:Function unknown)	ENOG4112D2K(Its presence in a non-photosynthetic plant (Epifagus virginiana) and experiments in tobacco indicate that it may have a function which is probably not related to photosynthesis)	PF05758.12(Ycf1:Ycf1)	sp|Q14FA0|TI214_POPAL(Protein TIC 214 OS=Populus alba OX=43335 GN=TIC214 PE=3 SV=1)
MSTRG.12537			283	0.86	0	0	0	0	1.86	0	0	0.72	0.86	0	0	1.81	0.79	0	1.88	0	0	0	0.82	0.8	0	0	1.07	0	0	0	0.5267	0.9067	0	0	0.8667	1.2567	0.2667	0	0	AFJ75842.1(ribulose-1,5-bisphosphate carboxylase/oxygenase large subunit, partial (chloroplast) [Descurainia sophia])	GO:0004497(molecular_function:monooxygenase activity); GO:0000287(molecular_function:magnesium ion binding); GO:0016984(molecular_function:ribulose-bisphosphate carboxylase activity); GO:0009853(biological_process:photorespiration); GO:0019253(biological_process:reductive pentose-phosphate cycle); GO:0009507(cellular_component:chloroplast)	K01601	rbcL	map00630(Glyoxylate and dicarboxylate metabolism); map00710(Carbon fixation in photosynthetic organisms)	COG1850(G:Carbohydrate transport and metabolism)	COG1850(RuBisCO catalyzes two reactions the carboxylation of D- ribulose 1,5-bisphosphate, the primary event in carbon dioxide fixation, as well as the oxidative fragmentation of the pentose substrate)	PF00016.20(RuBisCO_large:Ribulose bisphosphate carboxylase large chain, catalytic domain); PF02788.16(RuBisCO_large_N:Ribulose bisphosphate carboxylase large chain, N-terminal domain)	sp|P28376|RBL_ACESA(Ribulose bisphosphate carboxylase large chain (Fragment) OS=Acer saccharum OX=4024 GN=rbcL PE=3 SV=1)
MSTRG.12551			929	28	27	25	16	36	21.02	44	22	40	44	28	24	33	43	27	46	37	35	19	41	42	50	26	38	33	55	14	34.6667	30.6733	20.6667	32.3333	34.3333	41.6667	37.3333	19.6667	46.6667	XP_010999986.1(PREDICTED: uncharacterized protein LOC105107673 isoform X1 [Populus euphratica])	GO:0016787(molecular_function:hydrolase activity); GO:0016021(cellular_component:integral component of membrane); GO:0006629(biological_process:lipid metabolic process)				ENOG410XRFI(S:Function unknown); ENOG410YSY6(S:Function unknown)	ENOG410XRFI(triglyceride lipase activity); ENOG410YSY6(triglyceride lipase activity)
MSTRG.12556			264	3.99	0	2.32	4.52	2.31	0	1.21	0	0	1.21	4.43	1.43	2.54	0	2.57	3.53	0	1.18	0	2.86	0.78	1.39	2.79	1.26	10.02	2.65	0	2.1	0.4033	1.9833	2.6533	1.7033	2.55	3.6	0.93	1.74	RQO91826.1(hypothetical protein POPTR_006G166650 [Populus trichocarpa])
MSTRG.12561			213	0	0	0	1	0	0	0	0	0	0.69	0	1	0	0	0	0.75	0	0	0	0	0	0	0	0	0	0	0	0	0.23	0.6667	0	0	0.25	0	0	0	TKS13994.1(oxysterol-binding protein-related protein 1C isoform X1 [Populus alba])		K20456	OSBP		ENOG410XP9E(K:Transcription)	ENOG410XP9E(small nuclear ribonucleoprotein)		sp|Q8L751|ORP1C_ARATH(Oxysterol-binding protein-related protein 1C OS=Arabidopsis thaliana OX=3702 GN=ORP1C PE=2 SV=1)
MSTRG.12569			336	6.51	8.05	13.03	18.75	7.26	5.89	5.65	15.79	9.22	9.33	13.1	4.57	4.54	5.55	14.26	15.72	4.47	19.2	11.76	10.15	13.75	7.82	8.67	13.27	10.74	14.26	10.69	7.6633	7.7567	13.0367	10.5933	8.1167	13.0467	9.6533	10.3733	13.76
MSTRG.12604			493	1.7	0	0	0	0	0	3.59	0	0	2.9	0	1.27	1.41	5.01	0	0	0	0	2.71	0	0	0	0	0	0	4.17	0	0.5667	0.9667	0.4233	1.1967	2.14	0	0	0.9033	1.39	PNT32188.1(hypothetical protein POPTR_006G173100 [Populus trichocarpa])	GO:0007205(biological_process:protein kinase C-activating G-protein coupled receptor signaling pathway); GO:0046834(biological_process:lipid phosphorylation); GO:0005886(cellular_component:plasma membrane); GO:0046486(biological_process:glycerolipid metabolic process); GO:0046339(biological_process:diacylglycerol metabolic process); GO:0004143(molecular_function:diacylglycerol kinase activity); G…	K00901	dgkA, DGK	map00564(Glycerophospholipid metabolism); map04070(Phosphatidylinositol signaling system); map00561(Glycerolipid metabolism)	ENOG410XQVB(I:Lipid transport and metabolism)	ENOG410XQVB(DiacylGlycerol Kinase)		sp|Q1PDI2|DGK4_ARATH(Diacylglycerol kinase 4 OS=Arabidopsis thaliana OX=3702 GN=DGK4 PE=2 SV=1)
MSTRG.12613			312	0	0	1	1	1	0	2	0	1	0	3	0	2	0	0	5	0	1	0	0	2	4	2	0	1	5	3	0.6667	0	0.3333	2	0.6667	1.6667	1	1.6667	3.3333	TKS06055.1(hypothetical protein D5086_0000126700 [Populus alba])
MSTRG.12662			343	1	2	0	2	1	3	3	1	3	2	2	1	2	1	0	3	1	0	0	0	1	4	0	0	0	2	2	1.6667	2.3333	1.3333	1.6667	1	1	0.6667	0.6667	2
MSTRG.12682			481	55.74	46.02	62.62	74.83	51.77	42.18	37.43	75.42	59.99	73.97	77.48	91.66	18.14	49.38	32.12	33.33	60.91	79.08	70	40.85	39.96	75.13	65.36	68.38	51.17	60.94	54.69	55.8333	54.0567	80.6367	59.1767	33.2133	47.52	50.68	63.35	71.7167	PNT12644.1(hypothetical protein POPTR_011G097200 [Populus trichocarpa])
MSTRG.12785			342	7.53	1.27	3.54	8.23	5.68	6.85	0	12.55	7.81	1.4	5.33	8.51	3.21	7.87	1	3.81	3.31	5.61	7.33	7.5	3.19	12.13	3.53	5.38	4.79	2.47	5.1	7.0067	3.1733	9.7633	2.9567	4.0267	5.5633	3.7633	5.32	6.7367	XP_021804482.1(D-lactate dehydrogenase [cytochrome], mitochondrial-like isoform X2 [Prunus avium])
MSTRG.12794			237	1	1	1.01	1	1	1	2	1	0	1	3	1.27	1	2	2	4	0	2	1	0	1	0	1.98	1	1	0	3	0.6667	1	1.09	2.0033	1.6667	1.6667	0.6667	1.9933	0.6667	XP_011028724.1(PREDICTED: glutathione S-transferase T3-like, partial [Populus euphratica])					ENOG410YTD5(S:Function unknown)	ENOG410YTD5(-)	PF14303.6(NAM-associated:No apical meristem-associated C-terminal domain)
MSTRG.12796			635	12	10	17	13	8	12	11	25	14	6	26	13	13	4	11	16	11	20	10	16	9	27	19	21	21	11	12	11.3333	9.3333	17	18	9.3333	17.6667	13.6667	13.6667	19.3333	PNT32639.1(hypothetical protein POPTR_006G199900 [Populus trichocarpa])	GO:0016021(cellular_component:integral component of membrane)
MSTRG.12826			727	11	6	29	21	12	11	19	14	9	9	18	15	13	13	9	11	9	21	17	5	13	29	19	13	19	28	19	10.6667	8.6667	16.6667	22	11.6667	9.6667	13.6667	18.3333	26
MSTRG.12845			413	10.24	5.35	9.19	6.6	9.89	8.01	8.92	6.59	9.39	2.01	9.68	1.08	5.37	5.29	14.15	11.79	11.41	7.18	5.24	7.52	7.1	10.94	5.11	22.95	11.99	8.77	3.12	9.84	5.1233	4.7567	9.2633	8.27	14.0867	10.1667	4.49	8.9633	XP_024447864.1(zinc finger BED domain-containing protein RICESLEEPER 2 [Populus trichocarpa])					ENOG410ZT99(S:Function unknown); ENOG4111T8J(S:Function unknown)	ENOG410ZT99(Pfam:hATC); ENOG4111T8J(transposon protein)	PF14372.6(DUF4413:Domain of unknown function (DUF4413))	sp|Q0JMB2|RSLE4_ORYSJ(Zinc finger BED domain-containing protein RICESLEEPER 4 OS=Oryza sativa subsp. japonica OX=39947 GN=Os01g0518400 PE=2 SV=3)
MSTRG.12859			496	1	2	1	8	5	0	2	3	0	1	4	3	1	0	0	2	1	3	9	3	1	3	4	5	1	3	8	2	1	4.6667	2.3333	0.3333	3.3333	1	7	3
MSTRG.12892			389	0	0	0	4	0	0	0	1	0	0	0	5	0	0	0	0	0	0	7	0	0	0	9.36	0	0	0	14	0	0	3.3333	0	0	0	0	10.12	0	XP_024459532.1(uncharacterized protein LOC112327997 [Populus trichocarpa])					ENOG41107JT(S:Function unknown)	ENOG41107JT(Pfam:hATC)
MSTRG.12906			314	2	1	0	0	0	1	0	0	1	0	0	1	0	1	0	1	0	0	1	1	0	2	1	0	0	0	0	1	0.6667	0.3333	0	0.3333	0.6667	0	0.6667	0.6667
MSTRG.1294			369	3	3	0	3	2	2	1	3	5	3	1	1	4	5	1	6	3	2	1	2	5	1	2	4	5	2	0	3.3333	2.6667	2.3333	0.6667	3.3333	4	4.3333	1	1.6667
MSTRG.12955			1184	17	14	17	11	12	13	21	6	10	7	18	11	14	18	8	22	5	26	15	15	23	10	11	22	8	12	7	13	11.3333	9.3333	18.6667	13.3333	19.6667	12	11	16
MSTRG.12984			569	1	0	2	10	3	1	1	11	5	2	2	8	11	5	4	3	4	2	9	3	0	4	5	5	6	1	5	3	1	9.6667	1.6667	6.6667	3.6667	3.3333	6.3333	2.3333	PNT33038.1(hypothetical protein POPTR_006G221600 [Populus trichocarpa])
MSTRG.13010			2006	55	116.22	115	875.96	49	77	118	746.26	28	87	142	873.79	31	23	16	28	39	58	794.01	15	50	33	769	20	34	33	823	44	93.4067	832.003	125	23.3333	21	41	795.337	41.3333	XP_002309488.2(protein ALP1-like [Populus trichocarpa])					ENOG411206Y(O:Posttranslational modification, protein turnover, chaperones)	ENOG411206Y((alpha) subunit)	PF13359.6(DDE_Tnp_4:DDE superfamily endonuclease); PF04827.14(Plant_tran:Plant transposon protein)	sp|Q9M2U3|ALPL_ARATH(Protein ALP1-like OS=Arabidopsis thaliana OX=3702 GN=At3g55350 PE=2 SV=1)
MSTRG.13064			222	0	0	0	0	0	0	0	0	0	1	0	0	0	0	0	0	0	0	0	0	0	0	0	0	0	1	0	0	0.3333	0	0	0	0	0	0	0.3333
MSTRG.13143			543	18.01	21.01	28	18	9	43.01	27.01	18.01	14.03	25.02	40.04	17.01	19.01	21.07	12.01	17.01	19	52.41	18	23.01	16.38	55.08	25.04	14	13.01	34	14	13.68	29.68	17.6733	31.6833	17.3633	18.0067	16.13	19.0133	47.1633	XP_006373086.1(glycine-rich RNA-binding protein 4, mitochondrial [Populus trichocarpa] )	GO:0080156(biological_process:mitochondrial mRNA modification); GO:1990904(cellular_component:ribonucleoprotein complex); GO:0003723(molecular_function:RNA binding); GO:0005739(cellular_component:mitochondrion)				COG0724(S:Function unknown); ENOG410XZHK(S:Function unknown)	COG0724(Rna-binding protein); ENOG410XZHK(Rna-binding protein)		sp|Q04836|CP31A_ARATH(31 kDa ribonucleoprotein, chloroplastic OS=Arabidopsis thaliana OX=3702 GN=CP31A PE=1 SV=1)
MSTRG.13248			341	1	0	4	1	1	1	0	0	2	0	2	5	1	0	0	3	0	4	2	0	0	1	1	1	1	0	1	1.3333	0.3333	2	2	0.3333	1.3333	0.3333	1.3333	1.6667	RQO92198.1(hypothetical protein POPTR_006G252701 [Populus trichocarpa])	GO:0004674(molecular_function:protein serine/threonine kinase activity); GO:0016021(cellular_component:integral component of membrane); GO:0030246(molecular_function:carbohydrate binding); GO:0005524(molecular_function:ATP binding); GO:0004672(molecular_function:protein kinase activity)	K04733	IRAK4		COG0515(S:Function unknown)	COG0515(AFG1 family ATPase)
MSTRG.13250			444	0	0	3	0	0	0	0	0	1	0	0	1	0	0	1	1	0	2	1	0	0	2	1	7	0	2	1	0.3333	0	0.3333	1	0.3333	2.6667	0	1	2
MSTRG.13371			229	0	0	0	0	0	0	0	0	0	0	0	0	0	0	0	0.59	0.99	0	0	1.94	0	0	1.55	0	0	1.12	0	0	0	0	0	0	0.8433	0.33	0.5167	0.3733	PNT33977.1(hypothetical protein POPTR_006G268300 [Populus trichocarpa])	GO:1901006(biological_process:ubiquinone-6 biosynthetic process); GO:0003954(molecular_function:NADH dehydrogenase activity)				COG0702(G:Carbohydrate transport and metabolism); COG0702(M:Cell wall/membrane/envelope biogenesis)	COG0702(epimerase dehydratase); COG0702(epimerase dehydratase)		sp|Q9FVR6|Y1222_ARATH(Uncharacterized protein At1g32220, chloroplastic OS=Arabidopsis thaliana OX=3702 GN=At1g32220 PE=1 SV=1)
MSTRG.13375			397	2.68	0	0	0.91	0	0	1.18	0.65	0	0.91	7.37	0	0.11	5.01	0	4.77	0	0	1.54	2.8	1.45	2.42	0	1.19	4.63	2.07	0	0.8933	0.3033	0.52	2.85	1.7067	2.92	2.0267	0.5133	1.4967	RVW26213.1(Retrovirus-related Pol polyprotein from transposon TNT 1-94 [Vitis vinifera])	GO:0000943(cellular_component:retrotransposon nucleocapsid); GO:0015074(biological_process:DNA integration); GO:0008171(molecular_function:O-methyltransferase activity); GO:0004491(molecular_function:methylmalonate-semialdehyde dehydrogenase (acylating) activity); GO:0003676(molecular_function:nucleic acid binding)						PF07727.14(RVT_2:Reverse transcriptase (RNA-dependent DNA polymerase))	sp|Q94HW2|POLR1_ARATH(Retrovirus-related Pol polyprotein from transposon RE1 OS=Arabidopsis thaliana OX=3702 GN=RE1 PE=2 SV=1)
MSTRG.13376			540	8	6	7	1	3	0	5	3	2	5	10	2	13	4	14	4	5	2	0	5	6	6	4	8	15	11	1	4.3333	3.6667	2	7.3333	10.3333	5.6667	8.6667	1.6667	6.3333	PNX74724.1(gag-pol polyprotein, partial [Trifolium pratense])	GO:0071555(biological_process:cell wall organization); GO:0000943(cellular_component:retrotransposon nucleocapsid); GO:0016021(cellular_component:integral component of membrane); GO:0030244(biological_process:cellulose biosynthetic process); GO:0015074(biological_process:DNA integration); GO:0016760(molecular_function:cellulose synthase (UDP-forming) activity); GO:0003676(molecular_function:nucle…						PF13976.6(gag_pre-integrs:GAG-pre-integrase domain)
MSTRG.13392			311	19.67	13.7	21.79	12.81	11.58	8.27	5.89	11.35	6.51	16.47	16.93	5.06	4.93	6.23	10.52	16	7.19	21.67	7.92	7.68	5.78	11.82	3.14	22.37	22.32	8.85	4.24	12.5867	12.8133	9.74	14.87	7.2267	15.35	11.7633	5.1	14.1133	RQO92274.1(hypothetical protein POPTR_006G271640 [Populus trichocarpa])	GO:0043531(molecular_function:ADP binding)				COG4886(S:Function unknown)	COG4886(leucine Rich Repeat)	PF00931.22(NB-ARC:NB-ARC domain); PF13191.6(AAA_16:AAA ATPase domain)	sp|Q7XA40|RGA3_SOLBU(Putative disease resistance protein RGA3 OS=Solanum bulbocastanum OX=147425 GN=RGA3 PE=2 SV=2)
MSTRG.13393			313	0	0	0	0	0	0	0	0	0	2	0.6	0	3	1.85	0	0	1	0	0	1.59	0	0	0	0	0	0.04	0	0	0.6667	0	0.2	1.6167	0.53	0.3333	0	0.0133	XP_011002335.1(PREDICTED: replication protein A 32 kDa subunit A-like isoform X1 [Populus euphratica] )
MSTRG.13487			205	2	0	2	1	0	1	6.09	1	0	2	3.11	6	0	0	4	2	0	2	2	1	1	3.17	0	0	1	1	1	0.6667	1	2.6667	3.7333	1.3333	1	0.6667	1	2.0567	RQO97064.1(hypothetical protein POPTR_010G215600 [Populus trichocarpa])	GO:0003677(molecular_function:DNA binding)				ENOG410ZRFI(S:Function unknown)	ENOG410ZRFI(-)
MSTRG.13489			254	0	2	1.33	1	3	4.76	4	0	1	1	1	0	3	0	1	1	0	3.44	0	1.39	0	1.16	0	2	2	5	0	1.3333	2.5867	0.3333	2.11	1.3333	1.4633	0.6667	0	3.2	TKR90955.1(hypothetical protein D5086_0000228210, partial [Populus alba])	GO:0031011(cellular_component:Ino80 complex)				ENOG410XU84(S:Function unknown)	ENOG410XU84(-)
MSTRG.13491			216	0	0	0	0	1.6	0	0	0	0	0	2.99	0	0	2.18	0	0	0.91	0	0.5	1.76	2.3	1.63	0	0	1.5	0	0	0.5333	0	0	0.9967	0.7267	0.5867	1.57	0.1667	0.5433	PNT11350.1(hypothetical protein POPTR_011G014300, partial [Populus trichocarpa])
MSTRG.13494			745	1	0	1	2	1	0	0	3	2	2	0	1	3	0	2	3	2	2	0	2	2	1	0	4	1	0	2	1.3333	0.6667	2	0.3333	1.6667	3	1.6667	0.6667	1
MSTRG.13495			387	3.12	2.03	1.46	9.15	1.08	1.15	0	12.29	0	0	1	13.83	0	0.62	1.26	0	0	3.66	10.82	0	0.95	0	13.99	0	1.08	0	12.18	1.4	1.06	11.7567	0.82	0.6267	0	0.6767	12.33	1.22	ADN34143.1(copia-type polyprotein [Cucumis melo subsp. melo])	GO:0004491(molecular_function:methylmalonate-semialdehyde dehydrogenase (acylating) activity); GO:0000943(cellular_component:retrotransposon nucleocapsid); GO:0016301(molecular_function:kinase activity); GO:0015074(biological_process:DNA integration); GO:0008270(molecular_function:zinc ion binding); GO:0003676(molecular_function:nucleic acid binding); GO:0003964(molecular_function:RNA-directed DN…				ENOG410ZXEB(S:Function unknown); COG2801(L:Replication, recombination and repair)	ENOG410ZXEB(Integrase core domain); COG2801(Retrotransposon protein)		sp|P10978|POLX_TOBAC(Retrovirus-related Pol polyprotein from transposon TNT 1-94 OS=Nicotiana tabacum OX=4097 PE=2 SV=1)
MSTRG.13501			321	3	0	2	2	1	1	0	2	1	3	2	0	1	3	1	6	5	4	1	2	6	5	2	3.01	5	5	1	1.6667	1.3333	1.3333	1.3333	1.6667	3.67	5.3333	1.3333	4.6667	PNT33991.1(hypothetical protein POPTR_006G269700 [Populus trichocarpa])	GO:0016740(molecular_function:transferase activity); GO:0008033(biological_process:tRNA processing)	K15450	TYW3		COG1590(S:Function unknown)	COG1590(tRNA-yW synthesizing protein 3 homolog (S. cerevisiae))		sp|Q8W4K1|TYW23_ARATH(tRNA wybutosine-synthesizing protein 2/3/4 OS=Arabidopsis thaliana OX=3702 GN=At4g04670 PE=2 SV=1)
MSTRG.13530			2393	48	7	25	0	31	10	25	4	52	7	12	4	29	34	22	45	22	25	4	41	26	26	2	70	22	24	2	43.6667	8	2.6667	20.6667	28.3333	52	23.3333	2.6667	25	XP_024460966.1(uncharacterized protein LOC112328187 isoform X1 [Populus trichocarpa] )	GO:0046983(molecular_function:protein dimerization activity); GO:0003677(molecular_function:DNA binding)				ENOG410YAQ5(S:Function unknown)	ENOG410YAQ5(HAT dimerization domain-containing protein)	PF04937.15(DUF659:Protein of unknown function (DUF 659)); PF05699.14(Dimer_Tnp_hAT:hAT family C-terminal dimerisation region); PF02892.15(zf-BED:BED zinc finger)
MSTRG.1356			201	0	0	0	0	0	0	0	0	0	0	0	0	0	0	0	0	0	0	0	0	0	0	0	0	0	0	0	0	0	0	0	0	0	0	0	0
MSTRG.13566			752	0	0	0	9	0	0	0	6	0	0	0	16	0	0	0	0	0	0	6	0	0	0	6	0	0	0	5	0	0	10.3333	0	0	0	0	5.6667	0
MSTRG.13744			1228	26	14	34	4	9	1	21	6	6	11	17	5	0	0	2	6	3	2	9	4	3	5	11	6	6	0	3	13.6667	8.6667	5	24	0.6667	5.3333	4	7.6667	2.3333
MSTRG.13790			251	0	0	0	0	0	0	0	0	0	0	1	0	0	0	0	0	0	0	0	0	0	2	2	0	0	1	0	0	0	0	0.3333	0	0	0	0.6667	1	PNT26872.1(hypothetical protein POPTR_007G033500 [Populus trichocarpa])
MSTRG.13836			275	9.97	7.06	10	7.94	3.01	1	12	2	1	2.97	3	3	0	0	0	6.81	2	0	4.1	4	1	0	0	1	0	0	1	4.66	3.6767	4.3133	8.3333	0	3.9367	1	1.7	0
MSTRG.13838			261	2	0	1	1	0	0	3	1	0	0	2	4	0	0	0	1	0	0	3	1	1	0	4	0	0	0	1	0.6667	0	2	2	0	0.6667	0.3333	2.6667	0
MSTRG.13854			319	0	0	1	4	0	0	1	6	0	0	0	6	0	2	0	1	1	0	9	0	0	1	4	1	0	2	1	0	0	5.3333	0.6667	0.6667	0.6667	0.3333	4.6667	1	RQO92476.1(hypothetical protein POPTR_007G040850 [Populus trichocarpa])
MSTRG.13900			894	10	7	4	7	14	8	7	18	21	6	10	31	10	10	17	32	19	13	17	21	21	8	28	24	21	9	15	15	7	18.6667	7	12.3333	25.6667	20.3333	20	10	PNT27110.1(hypothetical protein POPTR_007G046300 [Populus trichocarpa])
MSTRG.13918			310	0	0.56	2.98	0	2.08	0	0	0	1.08	0	0	0	0	0	0	1	0	0	0	3.18	0	0	1.74	1.1	1.19	0	0	1.0533	0.1867	0	0.9933	0	1.76	0.3967	0.58	0	PNS22164.1(hypothetical protein POPTR_T166900 [Populus trichocarpa])	GO:0003678(molecular_function:DNA helicase activity); GO:0006310(biological_process:DNA recombination); GO:0000723(biological_process:telomere maintenance); GO:0005524(molecular_function:ATP binding); GO:0006281(biological_process:DNA repair)	K07466	RFA1, RPA1, rpa	map03430(Mismatch repair); map03440(Homologous recombination); map03420(Nucleotide excision repair); map03030(DNA replication)	ENOG41113RA(S:Function unknown); ENOG410Y4KS(S:Function unknown); ENOG4111CXX(S:Function unknown); COG0507(L:Replication, recombination and repair)	ENOG41113RA(-); ENOG410Y4KS(helicase-like protein); ENOG4111CXX(-); COG0507(exodeoxyribonuclease v alpha)
MSTRG.13929			246	2	0	0	0	0	0	0	0	9	0	0	0	3	0	3	0	3	0	0	0	2	0	0	0	1	0	0	3.6667	0	0	0	2	0	2	0	0	XP_024443776.1(zinc finger MYM-type protein 1 [Populus trichocarpa])	GO:0046983(molecular_function:protein dimerization activity); GO:0016021(cellular_component:integral component of membrane)				ENOG410YDI6(S:Function unknown); ENOG410YDJU(S:Function unknown)	ENOG410YDI6(hAT dimerisation domain-containing protein); ENOG410YDJU(-)	PF05699.14(Dimer_Tnp_hAT:hAT family C-terminal dimerisation region)
MSTRG.13943			287	0	0	0	0	1	0	1	1	2	0	0	0	0	0	0	3	5	1	1	0	0	1	0	1	1	1	1	1	0	0.3333	0.3333	0	1.3333	2	0.6667	1	RQO92535.1(hypothetical protein POPTR_007G051750 [Populus trichocarpa])
MSTRG.13952			260	0	0	1	2	0	0	1	1	0	0	0	0	1	2	2	0	3	0	3	0	0	0	0	0	0	0	0	0	0	1	0.6667	1.6667	0	1	1	0
MSTRG.13963			208	1	1	0	0	0	0	0	0	2	0	0	1	0	2	0	1	0	0	0	1	1	0	0	3	0	2	1	1	0.3333	0.3333	0	0.6667	1.6667	0.3333	0.3333	0.6667	XP_024465879.1(uncharacterized protein LOC112328886, partial [Populus trichocarpa])	GO:0003677(molecular_function:DNA binding)
MSTRG.13968			531	14	31	14	32	10	44.92	26	40	20	61	33.94	51	33	42.93	39.85	20	52.83	33	72	25	40.9	49	112.86	22	60	40	52	14.6667	45.64	41	24.6467	38.5933	22.3333	51.2433	78.9533	40.6667	XP_011013789.1(PREDICTED: putative formamidase C869.04 [Populus euphratica])	GO:0016811(molecular_function:hydrolase activity, acting on carbon-nitrogen (but not peptide) bonds, in linear amides)	K01455	E3.5.1.49	map00460(Cyanoamino acid metabolism); map00630(Glyoxylate and dicarboxylate metabolism); map00910(Nitrogen metabolism)	COG2421(C:Energy production and conversion)	COG2421(formamidase)
MSTRG.13972			211	142.56	243.68	3.67	3.55	108.15	216.49	14.36	31.61	213.88	113.55	29.18	15.06	286.28	284.21	239.26	170.86	145.39	29.75	5.1	94.55	160.88	36.09	6.55	79.22	210.72	34.1	11.98	154.863	191.24	16.74	15.7367	269.917	114.877	172.33	7.8767	33.3133	PPR92190.1(hypothetical protein GOBAR_AA28481 [Gossypium barbadense])	GO:0006436(biological_process:tryptophanyl-tRNA aminoacylation); GO:0015232(molecular_function:heme transporter activity); GO:0016021(cellular_component:integral component of membrane); GO:0016020(cellular_component:membrane); GO:0017004(biological_process:cytochrome complex assembly); GO:0003735(molecular_function:structural constituent of ribosome); GO:0003676(molecular_function:nucleic acid bi…	K01810	GPI, pgi	map00010(Glycolysis / Gluconeogenesis); map00030(Pentose phosphate pathway); map00500(Starch and sucrose metabolism); map00520(Amino sugar and nucleotide sugar metabolism)	ENOG411220X(S:Function unknown); COG0048(J:Translation, ribosomal structure and biogenesis)	ENOG411220X(unknow protein); COG0048(Interacts with and stabilizes bases of the 16S rRNA that are involved in tRNA selection in the A site and with the mRNA backbone. Located at the interface of the 30S and 50S subunits, it traverses the body of the 30S subunit contacting proteins on the other side and probably holding the rRNA structure together. The combined cluster of proteins S8, S12 and S17 …
MSTRG.13973			668	0	1	0	4.71	0	3.08	0	6.92	1.23	1.89	0	8.14	0	0	0.63	0	1.17	0	2.31	0	1.02	1	1.07	0	0	0	1.45	0.41	1.99	6.59	0	0.21	0	0.73	1.61	0.3333	XP_006386146.1(uncharacterized protein LOC18096075 [Populus trichocarpa] )	GO:0016021(cellular_component:integral component of membrane)				ENOG4110PWB(S:Function unknown)	ENOG4110PWB(-)
MSTRG.14			535	4	2	6	6	1	1	4	8	4	8	5	6	7	2	7	9	6	6	13	5	4	10	7	13	4	10	3	3	3.6667	6.6667	5	5.3333	9	4.6667	7.6667	8.6667
MSTRG.14008			258	7	11	6	8	1	10	9.03	10	4	8	7.01	8.86	2	7	3	2	1	9	6	3	8	13	5	1	3	5	15	4	9.6667	8.9533	7.3467	4	2	4	8.6667	9	TKR68989.1(uncharacterized protein D5086_0000309290 [Populus alba])					ENOG410YQM1(S:Function unknown); COG5059(S:Function unknown)	ENOG410YQM1(Protein of unknown function (DUF1645)); COG5059(Protein of unknown function (DUF1645))
MSTRG.14018			481	25.82	11.45	27.17	31.12	19.98	24.69	29.88	23.25	23.83	12	33.73	26.31	13.99	17	11.66	30.62	18.76	29.86	24.95	22.79	8.7	24.02	27.96	24	11.84	27.58	11.95	23.21	16.0467	26.8933	30.26	14.2167	25.8033	13.1	21.62	27.1533	XP_011028724.1(PREDICTED: glutathione S-transferase T3-like, partial [Populus euphratica])					ENOG410YTD5(S:Function unknown)	ENOG410YTD5(-)	PF14303.6(NAM-associated:No apical meristem-associated C-terminal domain)
MSTRG.14022			297	5	0	0	0	4	0	2	0	8	3	3	1	2	1	0	5	0	5	0	7	1	1	1	16	1	11	1	5.6667	1	0.3333	1.6667	1	9.3333	0.6667	0.6667	5.6667
MSTRG.14075			376	7.75	1.16	2.18	4.3	3.18	0.12	9.06	0.19	10.65	4.5	0	4.33	7.48	4.58	6.44	9.13	9.56	2.44	0.79	5.7	12	3.87	2.45	9.83	5.2	4.11	0.84	7.1933	1.9267	2.94	3.7467	6.1667	8.22	8.92	1.36	3.4733
MSTRG.14084			342	0	0	0	25	0	0	0	15	0	0	0	23	0	0	0	0	0	0	17	0	0	0	28	0	0	0	13	0	0	21	0	0	0	0	19.3333	0
MSTRG.14085			316	0	1	0	2	1	0	1	2	1	0	0	2	0	0	2	1	3	1	0	0	1	0	3	1	5	1	2	0.6667	0.3333	2	0.3333	0.6667	0.6667	3	1.6667	0.6667	XP_024444028.1(uncharacterized protein LOC112324611 [Populus trichocarpa])					ENOG4111SPB(S:Function unknown); ENOG410XWK2(S:Function unknown)	ENOG4111SPB(transposon protein); ENOG410XWK2(transposon protein)	PF02892.15(zf-BED:BED zinc finger)
MSTRG.14092			260	9	1	7	11	4	6	2	10	3	4	5	8	4	7	3	6	2	6	9	11	12	5	18	5	10	7	10	5.3333	3.6667	9.6667	4.6667	4.6667	7.3333	8	12.3333	6
MSTRG.14100			556	1	1	4	1	7	6	3	7	0	6	1	4	4	0	2	1	5	1	3	3	0	4	0	2	4	4	2	2.6667	4.3333	4	2.6667	2	2	3	1.6667	3
MSTRG.14151			398	4.41	3.27	1.97	0	7.48	1.98	7.75	0	0	1.47	4.07	2.99	7.71	4.3	12.57	5.2	4.32	12.43	2.46	2.96	4.65	4.49	4.21	9.89	3.27	5.63	3.21	3.9633	2.24	0.9967	4.5967	8.1933	6.0167	4.08	3.2933	7.5167	XP_024447864.1(zinc finger BED domain-containing protein RICESLEEPER 2 [Populus trichocarpa])					ENOG410ZT99(S:Function unknown); ENOG4111T8J(S:Function unknown)	ENOG410ZT99(Pfam:hATC); ENOG4111T8J(transposon protein)		sp|Q6AVI0|RSLE2_ORYSJ(Zinc finger BED domain-containing protein RICESLEEPER 2 OS=Oryza sativa subsp. japonica OX=39947 GN=Os03g0733400 PE=2 SV=1)
MSTRG.14166			217	0	0	0	3.57	0	0	0	0	0	0	0	0	0	0	0	0	0	0	0	0	0	0	0	0	0	0	0	0	0	1.19	0	0	0	0	0	0	RQO92678.1(hypothetical protein POPTR_007G074400 [Populus trichocarpa])	GO:0010333(molecular_function:terpene synthase activity); GO:0000287(molecular_function:magnesium ion binding)				ENOG410YBXH(S:Function unknown)	ENOG410YBXH(synthase)		sp|B9RI00|TPS6_RICCO(Probable terpene synthase 6 OS=Ricinus communis OX=3988 GN=TPS6 PE=3 SV=1)
MSTRG.14189			251	1	0	5	0	1	0	1	2	0	1	1	1	1	2	0	0	3	2	1	2	0	3	1	3	1	2	0	0.6667	0.3333	1	2.3333	1	1.6667	1.3333	0.6667	2.3333	PNT27667.1(hypothetical protein POPTR_007G077200 [Populus trichocarpa])
MSTRG.14196			259	2	2	1	0	1	3	4	0	5	1	3	0	1	1	1	4	0	1	1	2	3	0	0	1	0	2	0	2.6667	2	0	2.6667	1	2.3333	1	0.3333	1
MSTRG.14255			734	2	8	2	9	4	2	3	16	6	16	3	5	6	14	7	5	1	4	3	2	9	1	11	5	8	5	5	4	8.6667	10	2.6667	9	4	6	6.3333	3.3333	PNT27818.1(hypothetical protein POPTR_007G085400 [Populus trichocarpa])
MSTRG.14297			601	0	0	0	2.03	0	0	0	0	0	0	0	0	0	0	0	0	0	0	0	0	0	0	0	0	0	0	0	0	0	0.6767	0	0	0	0	0	0	PNT27921.1(hypothetical protein POPTR_007G091500, partial [Populus trichocarpa])	GO:0000381(biological_process:regulation of alternative mRNA splicing, via spliceosome); GO:0000380(biological_process:alternative mRNA splicing, via spliceosome); GO:0006281(biological_process:DNA repair); GO:0043484(biological_process:regulation of RNA splicing); GO:0003723(molecular_function:RNA binding); GO:0003676(molecular_function:nucleic acid binding)	K12840	RBM17, SPF45	map03040(Spliceosome)	ENOG410XWJ5(S:Function unknown); ENOG410ZV2R(S:Function unknown)	ENOG410XWJ5(RNA binding motif protein 17); ENOG410ZV2R(G-patch domain)	PF01585.23(G-patch:G-patch domain)	sp|P42698|DR111_ARATH(DNA-damage-repair/toleration protein DRT111, chloroplastic OS=Arabidopsis thaliana OX=3702 GN=DRT111 PE=1 SV=2)
MSTRG.1434			402	4	10	0	4	1	4	1	1	1	1	0	3	9	1	5	0	3	1	1	1	2	2	2	0	12	2	1	2	5	2.6667	0.3333	5	0.3333	5.6667	1.3333	1.6667	XP_024465643.1(uncharacterized protein LOC112328846 [Populus trichocarpa])	GO:0004523(molecular_function:RNA-DNA hybrid ribonuclease activity); GO:0003676(molecular_function:nucleic acid binding)				ENOG410Y65V(S:Function unknown); ENOG4111K5V(S:Function unknown); ENOG410YADE(S:Function unknown)	ENOG410Y65V(serine threonine kinase receptor associated protein); ENOG4111K5V(Reverse transcriptase (RNA-dependent DNA polymerase)); ENOG410YADE(Reverse transcriptase (RNA-dependent DNA polymerase))	PF13966.6(zf-RVT:zinc-binding in reverse transcriptase)
MSTRG.14347			467	0	0	0	12.55	0	0	0	8.92	0	0.94	0	11.29	0	0.9	0	0	0	0.94	11.18	0	1.99	0	12.89	0	0	0	11.51	0	0.3133	10.92	0	0.3	0	0.6633	11.86	0.3133	ACN78973.1(copia-type polyprotein [Glycine max] )	GO:0000943(cellular_component:retrotransposon nucleocapsid); GO:0015074(biological_process:DNA integration); GO:0003964(molecular_function:RNA-directed DNA polymerase activity); GO:0008270(molecular_function:zinc ion binding); GO:0003676(molecular_function:nucleic acid binding)				ENOG410ZXEB(S:Function unknown); ENOG410XS4D(S:Function unknown); COG2801(L:Replication, recombination and repair)	ENOG410ZXEB(Integrase core domain); ENOG410XS4D(Retrotransposon protein); COG2801(Retrotransposon protein)	PF13976.6(gag_pre-integrs:GAG-pre-integrase domain); PF00665.26(rve:Integrase core domain)	sp|P10978|POLX_TOBAC(Retrovirus-related Pol polyprotein from transposon TNT 1-94 OS=Nicotiana tabacum OX=4097 PE=2 SV=1)
MSTRG.14386			265	237	254	738	1215	167	457	1661	1589	197	528	797	1982	509	451	394	264	360	864	2171	224	391	1223	1797	281	367	840	2074	200.333	413	1595.33	1065.33	451.333	256.333	372.667	2014	975.667	PNT28183.1(hypothetical protein POPTR_007G103600 [Populus trichocarpa])
MSTRG.14396			567	1	3	0	9	0	1	0	9	0	1	1	8	1	2	1	1	2	3	5	1	0	0	6	2	1	3	7	0.3333	1.6667	8.6667	0.3333	1.3333	1.3333	1	6	2
MSTRG.14397			683	20	22	23	82	18	40	41	73	42	38	26	51	35	33	37	32	38	21	80	28	29	29	106	35	42	20	48	26.6667	33.3333	68.6667	30	35	31.6667	36.3333	78	23.3333	XP_023892317.1(histone deacetylase 14-like [Quercus suber])	GO:0016787(molecular_function:hydrolase activity)				COG0123(B:Chromatin structure and dynamics); COG0123(Q:Secondary metabolites biosynthesis, transport and catabolism)	COG0123(Histone deacetylase); COG0123(Histone deacetylase)	PF17691.1(Croc_4:Contingent replication of cDNA 4)	sp|Q941D6|HDA14_ARATH(Histone deacetylase 14 OS=Arabidopsis thaliana OX=3702 GN=HDA14 PE=1 SV=1)
MSTRG.14466			565	0.78	4.43	10.43	17.17	4.46	6.75	22.42	13.16	8.08	9.34	19.52	21.04	3.79	13.49	6.67	0	12.5	15.58	9.21	7.95	3.03	15.5	12.88	21.43	5.9	4.85	10.08	4.44	6.84	17.1233	17.4567	7.9833	9.7933	7.1433	10.7233	11.9767
MSTRG.14467			1012	8.92	7.87	17.32	11.39	8.04	5.19	35	17.98	19.88	22.58	15.13	13.36	17.23	22.52	14.14	2.12	5.68	29.05	12.86	6.26	21.93	25.65	1.83	13.52	0.71	21.35	20.57	12.28	11.88	14.2433	22.4833	17.9633	7.3	9.44	11.7533	25.35	RQO92869.1(hypothetical protein POPTR_007G113500 [Populus trichocarpa])	GO:0016021(cellular_component:integral component of membrane)
MSTRG.14493			470	9	7	6	4	0	8	1	1	1	3	5	0	1	1	9	2	5	1	2	0	4	3	4	1	1	4	0	3.3333	6	1.6667	4	3.6667	1	3.3333	2	2.6667	RVW94059.1(Retrovirus-related Pol polyprotein from transposon TNT 1-94 [Vitis vinifera])	GO:0000943(cellular_component:retrotransposon nucleocapsid); GO:0015074(biological_process:DNA integration); GO:0003676(molecular_function:nucleic acid binding)							sp|Q9ZT94|POLR2_ARATH(Retrovirus-related Pol polyprotein from transposon RE2 OS=Arabidopsis thaliana OX=3702 GN=RE2 PE=4 SV=1)
MSTRG.14494			647	18.84	0	28.87	625.42	11.92	4.55	13.76	398.41	16.58	4.02	10.53	202.43	3.64	3.65	0.9	13.77	10.99	11.91	74.07	6.92	4.28	14.24	68.72	20.21	2.9	17.33	33.56	15.78	2.8567	408.753	17.72	2.73	13.6333	6.0567	58.7833	14.4933	XP_024461623.1(alcohol dehydrogenase-like [Populus trichocarpa] )	GO:0004024(molecular_function:alcohol dehydrogenase activity, zinc-dependent); GO:0005829(cellular_component:cytosol); GO:0046294(biological_process:formaldehyde catabolic process); GO:0008270(molecular_function:zinc ion binding); GO:0051903(molecular_function:S-(hydroxymethyl)glutathione dehydrogenase activity); GO:0016491(molecular_function:oxidoreductase activity)	K18857	ADH1	map00010(Glycolysis / Gluconeogenesis); map00592(alpha-Linolenic acid metabolism); map00071(Fatty acid degradation); map00350(Tyrosine metabolism)	COG1062(C:Energy production and conversion)	COG1062(alcohol dehydrogenase)	PF00107.26(ADH_zinc_N:Zinc-binding dehydrogenase); PF16912.5(Glu_dehyd_C:Glucose dehydrogenase C-terminus)	sp|P06525|ADH1_ARATH(Alcohol dehydrogenase class-P OS=Arabidopsis thaliana OX=3702 GN=ADH1 PE=1 SV=2)
MSTRG.14506			247	3	3	10	0	2	9	11	0	1	7	7	0	3	8	1	6	7	6	0	5	4	6	0	11	6	4	0	2	6.3333	0	9.3333	4	7.3333	5.6667	0	5.3333
MSTRG.14507			844	12	11	16	0	11	7	15	0	9	15	18	0	5	14	3	10	12	21	0	11	4	9	0	12	8	9	0	10.6667	11	0	16.3333	7.3333	11	8	0	13	TKR91031.1(hypothetical protein D5086_0000227490 [Populus alba])	GO:0009451(biological_process:RNA modification)				ENOG410Z7Z7(S:Function unknown)	ENOG410Z7Z7(-)		sp|Q9LN01|PPR21_ARATH(Pentatricopeptide repeat-containing protein At1g08070, chloroplastic OS=Arabidopsis thaliana OX=3702 GN=PCMP-H12 PE=2 SV=1)
MSTRG.14509			496	13	6	16	19	12	12	15	16	16	12	18	14	11	17	11	29	10	24	17	12	5	22	15	19	19	25	8	13.6667	10	16.3333	16.3333	13	20	11.3333	13.3333	23.6667	XP_024461066.1(uncharacterized protein LOC7486050 [Populus trichocarpa] )	GO:0046983(molecular_function:protein dimerization activity); GO:0005634(cellular_component:nucleus); GO:0003677(molecular_function:DNA binding)
MSTRG.14557			596	40	78	48	83	25	90	84	86.01	33	97	52	72	50	65.2	66	47	87	79	73	24	95	67	87	24	100	49	79	32.6667	88.3333	80.3367	61.3333	60.4	31.6667	94	79.6667	65	RQO92925.1(hypothetical protein POPTR_007G125750 [Populus trichocarpa])
MSTRG.14569			485	11	17	55	95	2	13	56	135	9	14	264	131	67	34	50	21	23	194	208	10	102	245	195	40	65	203	210	7.3333	14.6667	120.333	125	50.3333	23.6667	63.3333	204.333	214	PNT28566.1(hypothetical protein POPTR_007G127100, partial [Populus trichocarpa])
MSTRG.14613			984	88.06	43.61	126.23	67.01	48.83	68.3	97.72	82.05	144.3	47.44	136.9	75.19	68.44	92.13	58.07	99.48	91.14	161.66	116.47	82.96	77.13	220.41	77.14	122.28	66.77	208.87	84.77	93.73	53.1167	74.75	120.283	72.88	101.573	78.3467	92.7933	196.98	XP_024460871.1(uncharacterized GPI-anchored protein At1g61900 [Populus trichocarpa])					ENOG4111AH0(S:Function unknown)	ENOG4111AH0(-)		sp|Q8GUI4|UGPI6_ARATH(Uncharacterized GPI-anchored protein At1g61900 OS=Arabidopsis thaliana OX=3702 GN=At1g61900 PE=2 SV=1)
MSTRG.14625			1409	29	18	36	19	26	34	35	41	33	22	24	55	23	34	29	38	27	33	24	20	24	24	41	36	33	42	55	29.3333	24.6667	38.3333	31.6667	28.6667	31.3333	28	40	33	PNT28734.1(hypothetical protein POPTR_007G134900 [Populus trichocarpa])					ENOG410YPEW(S:Function unknown)	ENOG410YPEW(-)
MSTRG.14648			308	21	21	15	8	26	13	7	7	6	13	4.03	4	7	2	2	5	8	4	6.04	3	8	3	8	6	8	1	2	17.6667	15.6667	6.3333	8.6767	3.6667	4.6667	8	5.3467	2.6667	TKS12198.1(hypothetical protein D5086_0000065710 [Populus alba])	GO:0004012(molecular_function:phospholipid-translocating ATPase activity); GO:0016021(cellular_component:integral component of membrane); GO:0000287(molecular_function:magnesium ion binding); GO:0045332(biological_process:phospholipid translocation); GO:0005886(cellular_component:plasma membrane); GO:0005524(molecular_function:ATP binding)	K01530	E7.6.2.1		COG0474(E:Amino acid transport and metabolism); ENOG410XPYK(P:Inorganic ion transport and metabolism)	COG0474(aminotransferase); ENOG410XPYK(P-type atpase)	PF16209.5(PhoLip_ATPase_N:Phospholipid-translocating ATPase N-terminal)	sp|P98205|ALA2_ARATH(Phospholipid-transporting ATPase 2 OS=Arabidopsis thaliana OX=3702 GN=ALA2 PE=1 SV=1)
MSTRG.14659			213	0	0	0	0	0	0	0	0	0	1	0	0	0	0	2	0	2	0	0	0	0	0	0	0	0	0	0	0	0.3333	0	0	0.6667	0	0.6667	0	0
MSTRG.14666			393	2.61	2.08	5	0	3	2.71	6	2.09	10.46	13.47	14.15	6.24	3.7	12.31	8.12	5.14	7.93	3.98	8.19	3.13	4.01	1.47	1.86	9.31	5.91	7.91	0	5.3567	6.0867	2.7767	8.3833	8.0433	5.86	5.95	3.35	4.4533	XP_011001948.1(PREDICTED: uncharacterized protein LOC105109054 [Populus euphratica])	GO:0004386(molecular_function:helicase activity)				ENOG410YPC1(S:Function unknown)	ENOG410YPC1(-)
MSTRG.14674			622	3	4	2	124	0	3	1	106	0	11	2	113	5	7	20	3	9	3	203	0	70	8	194	0	13	0	132	1	6	114.333	1.6667	10.6667	1	30.6667	176.333	3.6667	PNT28842.1(hypothetical protein POPTR_007G141800 [Populus trichocarpa])					ENOG4111K5V(S:Function unknown); ENOG410Y65V(S:Function unknown)	ENOG4111K5V(Reverse transcriptase (RNA-dependent DNA polymerase)); ENOG410Y65V(Retrotransposon protein)
MSTRG.14707			2681	81.14	35.45	37.83	1.02	69.23	54.62	16.44	5.34	56.2	54.25	27.59	3.3	54.49	51.82	67.31	44.5	62.6	15.3	8.79	28.9	43.91	8.34	3.28	35.87	46.25	20	2.13	68.8567	48.1067	3.22	27.2867	57.8733	36.4233	50.92	4.7333	14.5467	PRQ17740.1(putative RNA-directed DNA polymerase [Rosa chinensis])	GO:0003964(molecular_function:RNA-directed DNA polymerase activity); GO:0015074(biological_process:DNA integration); GO:0000943(cellular_component:retrotransposon nucleocapsid); GO:0008270(molecular_function:zinc ion binding); GO:0003676(molecular_function:nucleic acid binding)				ENOG410ZXEB(S:Function unknown); COG2801(L:Replication, recombination and repair)	ENOG410ZXEB(Integrase core domain); COG2801(Retrotransposon protein)	PF00665.26(rve:Integrase core domain); PF13976.6(gag_pre-integrs:GAG-pre-integrase domain); PF14223.6(Retrotran_gag_2:gag-polypeptide of LTR copia-type)	sp|P10978|POLX_TOBAC(Retrovirus-related Pol polyprotein from transposon TNT 1-94 OS=Nicotiana tabacum OX=4097 PE=2 SV=1)
MSTRG.14717			1721	34	8	2	32	36	8	5	13	6	5	10	18	13	14	8	7	8	5	10	9	6	7	15	8	13	6	12	25.3333	7	21	5.6667	11.6667	8	9	12.3333	6	XP_024455931.1(uncharacterized protein LOC18098285 [Populus trichocarpa])	GO:0003964(molecular_function:RNA-directed DNA polymerase activity); GO:0004523(molecular_function:RNA-DNA hybrid ribonuclease activity); GO:0003676(molecular_function:nucleic acid binding); GO:0008270(molecular_function:zinc ion binding)				ENOG410Y65V(K:Transcription); ENOG4111MK6(S:Function unknown)	ENOG410Y65V(GC-rich sequence DNA-binding factor); ENOG4111MK6(Retrotransposon protein)	PF13456.6(RVT_3:Reverse transcriptase-like); PF13966.6(zf-RVT:zinc-binding in reverse transcriptase)	sp|P0C2F6|RNHX1_ARATH(Putative ribonuclease H protein At1g65750 OS=Arabidopsis thaliana OX=3702 GN=At1g65750 PE=3 SV=1)
MSTRG.14719			205	0	0	0	1	0	0	0	0	0	0	1.02	0	0	0	0	0	0	0	0	0	0	0	0	0	0.98	0.98	0	0	0	0.3333	0.34	0	0	0.3267	0	0.3267	RZB74725.1(Tetraspanin-3 [Glycine soja])	GO:0016021(cellular_component:integral component of membrane); GO:0009506(cellular_component:plasmodesma); GO:0005886(cellular_component:plasma membrane)				ENOG410YB0X(S:Function unknown)	ENOG410YB0X(Tetraspanin family)		sp|Q9M1E7|TET3_ARATH(Tetraspanin-3 OS=Arabidopsis thaliana OX=3702 GN=TET3 PE=1 SV=1)
MSTRG.14728			229	0	0	0	0	2	3	0	4	2	1	1	3	0	3	1	2	1	0	3	0	1	0	3	2	1	1	1	1.3333	1.3333	2.3333	0.3333	1.3333	1.3333	1	2.3333	0.3333
MSTRG.14743			372	4.04	3.08	0	4.11	1.14	1.16	0	2.23	2	5.77	3.55	5.1	7.89	8.36	5.66	3.76	4.45	2	2.89	2.41	1.26	3.01	8.39	7.55	2.02	0	2.41	2.3933	3.3367	3.8133	1.1833	7.3033	4.5733	2.5767	4.5633	1.67	RQO89780.1(hypothetical protein POPTR_004G232250 [Populus trichocarpa])	GO:0016021(cellular_component:integral component of membrane); GO:0015074(biological_process:DNA integration); GO:0008270(molecular_function:zinc ion binding); GO:0003676(molecular_function:nucleic acid binding); GO:0004672(molecular_function:protein kinase activity); GO:0005524(molecular_function:ATP binding)						PF17921.1(Integrase_H2C2:Integrase zinc binding domain)	sp|Q99315|YG31B_YEAST(Transposon Ty3-G Gag-Pol polyprotein OS=Saccharomyces cerevisiae (strain ATCC 204508 / S288c) OX=559292 GN=TY3B-G PE=1 SV=3)
MSTRG.1475			334	4	2	0	2	1	13	1	0	0	0	0	0	3	1	6	6	4	0	5	1	2	0	0	2	7	0	1	1.6667	5	0.6667	0.3333	3.3333	3	4.3333	2	0	XP_024465643.1(uncharacterized protein LOC112328846 [Populus trichocarpa])	GO:0006281(biological_process:DNA repair); GO:0000943(cellular_component:retrotransposon nucleocapsid); GO:0016301(molecular_function:kinase activity); GO:0004523(molecular_function:RNA-DNA hybrid ribonuclease activity); GO:0003676(molecular_function:nucleic acid binding); GO:0003677(molecular_function:DNA binding); GO:0005524(molecular_function:ATP binding)				ENOG4111K5V(S:Function unknown); ENOG410Y65V(S:Function unknown); ENOG410YADE(S:Function unknown)	ENOG4111K5V(Reverse transcriptase (RNA-dependent DNA polymerase)); ENOG410Y65V(Retrotransposon protein); ENOG410YADE(Retrotransposon protein)		sp|P0C2F6|RNHX1_ARATH(Putative ribonuclease H protein At1g65750 OS=Arabidopsis thaliana OX=3702 GN=At1g65750 PE=3 SV=1)
MSTRG.1476			238	1	0	0	0	1	0	0	0	0	0	0	0	0	0	1	0	2	1	0	0	0	0	0	0	1	0	0	0.6667	0	0	0	0.3333	0	1	0	0.3333	XP_024465643.1(uncharacterized protein LOC112328846 [Populus trichocarpa])	GO:0016301(molecular_function:kinase activity); GO:0003723(molecular_function:RNA binding)				ENOG4111K5V(S:Function unknown); ENOG410YADE(S:Function unknown); ENOG410Y65V(S:Function unknown)	ENOG4111K5V(Reverse transcriptase (RNA-dependent DNA polymerase)); ENOG410YADE(Reverse transcriptase (RNA-dependent DNA polymerase)); ENOG410Y65V(Reverse transcriptase (RNA-dependent DNA polymerase))	PF00078.27(RVT_1:Reverse transcriptase (RNA-dependent DNA polymerase))
MSTRG.14782			2556	402	301	374	407	326	356	453	391	363	371	413	342	433	407	431	380	441	358	328	319	363	419	370	428	417	418	317	363.667	342.667	380	413.333	423.667	375.667	407	338.333	398.333	XP_024463244.1(uncharacterized protein LOC112328478 isoform X1 [Populus trichocarpa] )	GO:0046983(molecular_function:protein dimerization activity); GO:0003677(molecular_function:DNA binding)				ENOG4111ZT7(S:Function unknown); ENOG4111SPB(S:Function unknown); ENOG410XWK2(S:Function unknown)	ENOG4111ZT7(Protein of unknown function (DUF 659)); ENOG4111SPB(transposon protein); ENOG410XWK2(transposon protein)	PF04937.15(DUF659:Protein of unknown function (DUF 659)); PF05699.14(Dimer_Tnp_hAT:hAT family C-terminal dimerisation region); PF02892.15(zf-BED:BED zinc finger)
MSTRG.14788			715	17	5	2	15	5	7	5	6	9	10	8	20	10	3	3	13	10	5	11	6	0	9	13	20	6	12	18	10.3333	7.3333	13.6667	5	5.3333	13	5.3333	14	8.6667	TKR66446.1(hypothetical protein D5086_0000311360 [Populus alba])	GO:0000814(cellular_component:ESCRT II complex); GO:0032509(biological_process:endosome transport via multivesicular body sorting pathway); GO:0043130(molecular_function:ubiquitin binding); GO:0032266(molecular_function:phosphatidylinositol-3-phosphate binding)	K12190	VPS36, EAP45	map04144(Endocytosis)	ENOG410XR74(U:Intracellular trafficking, secretion, and vesicular transport)	ENOG410XR74(vacuolar protein sorting)	PF11605.8(Vps36_ESCRT-II:Vacuolar protein sorting protein 36 Vps36); PF04157.16(EAP30:EAP30/Vps36 family)	sp|Q9FF81|VPS36_ARATH(Vacuolar protein sorting-associated protein 36 OS=Arabidopsis thaliana OX=3702 GN=VPS36 PE=1 SV=1)
MSTRG.14800			425	2	0	1	3	2	1	1	0	0	1	8	0	0	2	0	0	0	3	0	3	2	4	1	3	1	2	0	1.3333	0.6667	1	3.3333	0.6667	2	1	0.3333	3	PNT22101.1(hypothetical protein POPTR_008G013600 [Populus trichocarpa])	GO:0004674(molecular_function:protein serine/threonine kinase activity); GO:0016021(cellular_component:integral component of membrane); GO:0005524(molecular_function:ATP binding); GO:0004672(molecular_function:protein kinase activity)							sp|C0LGP4|Y3475_ARATH(Probable LRR receptor-like serine/threonine-protein kinase At3g47570 OS=Arabidopsis thaliana OX=3702 GN=At3g47570 PE=2 SV=1)
MSTRG.1482			2341	45.45	39.58	48.08	58.81	47.39	73.66	54.95	51.18	30.84	72.38	49.77	63.17	58.89	95.3	86.47	52.41	106.68	52.61	72.25	36.96	67.6	67.01	70.71	60.47	84.16	45.54	38.06	41.2267	61.8733	57.72	50.9333	80.22	49.9467	86.1467	60.34	55.0533	RVW89396.1(Retrovirus-related Pol polyprotein from transposon TNT 1-94 [Vitis vinifera])	GO:0000943(cellular_component:retrotransposon nucleocapsid); GO:0015074(biological_process:DNA integration); GO:0008270(molecular_function:zinc ion binding); GO:0003676(molecular_function:nucleic acid binding)				ENOG410XS4D(S:Function unknown)	ENOG410XS4D(positive regulation of collateral sprouting)	PF07727.14(RVT_2:Reverse transcriptase (RNA-dependent DNA polymerase))	sp|Q94HW2|POLR1_ARATH(Retrovirus-related Pol polyprotein from transposon RE1 OS=Arabidopsis thaliana OX=3702 GN=RE1 PE=2 SV=1)
MSTRG.14820			591	3	0	2	2	1	0	10	5	5	2	3	5	0	4	2	6	1	12	5	4	0	5	4	6	2	4	1	3	0.6667	4	5	2	5.3333	1	3.3333	7	PNT22136.1(hypothetical protein POPTR_008G015900, partial [Populus trichocarpa])
MSTRG.14902			865	34	32	29	42	23	28	28	40	34	20	25	36	44	34	48	40	24	37	35	35	30	32	58	52	25	37	44	30.3333	26.6667	39.3333	27.3333	42	42.3333	26.3333	45.6667	35.3333	PNT22326.1(hypothetical protein POPTR_008G026500 [Populus trichocarpa])	GO:0003676(molecular_function:nucleic acid binding); GO:0005524(molecular_function:ATP binding); GO:0004386(molecular_function:helicase activity)				ENOG410XSQV(L:Replication, recombination and repair)	ENOG410XSQV(ATP-dependent RNA helicase)
MSTRG.14939			510	4	1	7	2	2	1	3	0	2	2	1	0	0	2	1	1	0	3	0	7	0	2	0	0	1	3	2	2.6667	1.3333	0.6667	3.6667	1	2.6667	0.3333	0.6667	2.6667	PNT22430.1(hypothetical protein POPTR_008G032400, partial [Populus trichocarpa])	GO:0005975(biological_process:carbohydrate metabolic process); GO:0009570(cellular_component:chloroplast stroma); GO:0016021(cellular_component:integral component of membrane); GO:0005983(biological_process:starch catabolic process); GO:0051060(molecular_function:pullulanase activity); GO:0010303(molecular_function:limit dextrinase activity); GO:0019252(biological_process:starch biosynthetic proc…				COG1523(S:Function unknown)	COG1523(Ras-related protein)		sp|Q8GTR4|PULA1_ARATH(Pullulanase 1, chloroplastic OS=Arabidopsis thaliana OX=3702 GN=PU1 PE=1 SV=2)
MSTRG.14940			208	0	0	0	0	0	0	0	0	0	0	2	0	0	0	0	2	0	0	0	0	0	1	0	0	0	0	0	0	0	0	0.6667	0	0.6667	0	0	0.3333	TKS17006.1(pullulanase 1, chloroplastic isoform X1 [Populus alba])	GO:0005975(biological_process:carbohydrate metabolic process); GO:0051060(molecular_function:pullulanase activity)				COG1523(G:Carbohydrate transport and metabolism)	COG1523(Glycogen debranching enzyme)		sp|Q8GTR4|PULA1_ARATH(Pullulanase 1, chloroplastic OS=Arabidopsis thaliana OX=3702 GN=PU1 PE=1 SV=2)
MSTRG.14951			1746	95.24	91.3	100.54	117.02	84.71	120.78	98.44	115.13	67.33	101.04	92.66	123.9	81.32	140.15	125.19	72.12	123.27	98.34	121.09	81.08	120.57	85.58	113.72	103.42	145.27	98.27	84.64	82.4267	104.373	118.683	97.2133	115.553	85.54	129.703	106.483	94.0633	PNT22460.1(hypothetical protein POPTR_008G033800 [Populus trichocarpa])	GO:0000159(cellular_component:protein phosphatase type 2A complex); GO:0019888(molecular_function:protein phosphatase regulator activity); GO:0006470(biological_process:protein dephosphorylation); GO:0005829(cellular_component:cytosol); GO:0031952(biological_process:regulation of protein autophosphorylation); GO:0072542(molecular_function:protein phosphatase activator activity); GO:0007165(biolog…	K11584	PPP2R5	map05165(Human papillomavirus infection); map03015(mRNA surveillance pathway)	ENOG410XQJW(S:Function unknown)	ENOG410XQJW(leucine Rich Repeat)	PF01603.20(B56:Protein phosphatase 2A regulatory B subunit (B56 family))
MSTRG.14952			1602	22.76	9.7	26.46	3.98	8.29	15.22	22.56	25.87	32.67	40.96	18.34	22.1	25.68	34.85	33.81	17.88	25.73	26.66	19.91	18.92	35.43	44.42	42.28	33.58	44.73	29.73	12.36	21.24	21.96	17.3167	22.4533	31.4467	23.46	35.2967	24.85	33.6033	PNT22460.1(hypothetical protein POPTR_008G033800 [Populus trichocarpa])							PF01603.20(B56:Protein phosphatase 2A regulatory B subunit (B56 family))
MSTRG.1496			701	6.01	5	3	1.39	6.51	6.66	6.41	10.69	4	4	4.27	3.85	11.76	24.04	7.86	4	4.21	10.98	12.93	6	13.48	7.15	13.41	11.78	7.46	3.12	11.64	5.5067	5.22	5.31	4.56	14.5533	7.26	8.3833	12.66	7.0833	XP_024444496.1(uncharacterized protein LOC112324672 [Populus trichocarpa])					ENOG4111SPB(S:Function unknown); ENOG4111XVU(S:Function unknown)	ENOG4111SPB(transposon protein); ENOG4111XVU(-)	PF05699.14(Dimer_Tnp_hAT:hAT family C-terminal dimerisation region)
MSTRG.14983			1391	11	65	32	0	14	76	19	0	13	67	42	0	52	93	65	7	77	38	0	6	97	46	0	28	47	29	0	12.6667	69.3333	0	31	70	13.6667	73.6667	0	37.6667	RQO94129.1(hypothetical protein POPTR_008G037850 [Populus trichocarpa])	GO:0004802(molecular_function:transketolase activity); GO:0003824(molecular_function:catalytic activity); GO:0047896(molecular_function:formaldehyde transketolase activity)	K00615	E2.2.1.1, tktA, tktB	map00030(Pentose phosphate pathway); map00710(Carbon fixation in photosynthetic organisms)	COG0021(G:Carbohydrate transport and metabolism)	COG0021(Transketolase)	PF02779.24(Transket_pyr:Transketolase, pyrimidine binding domain)	sp|F4IW47|TKTC2_ARATH(Transketolase-2, chloroplastic OS=Arabidopsis thaliana OX=3702 GN=TKL-2 PE=1 SV=1)
MSTRG.1500			392	1	0	3	4	0	0	2	1	0	0	0	4	0	0	0	2	1	11	3	0	1	1	2	0	0	4	3	0.3333	0	3	1.6667	0	0.6667	0.6667	2.6667	5.3333
MSTRG.1501			1310	45.22	17.21	68.47	39.93	45.71	29.47	77.79	46.79	61.27	51.53	52.88	56.19	66.56	80.16	61.94	52	60.68	46.35	55.25	49.94	72.16	67.3	75.82	107	71	70.29	29.94	50.7333	32.7367	47.6367	66.38	69.5533	69.6467	67.9467	53.67	61.3133	XP_024447864.1(zinc finger BED domain-containing protein RICESLEEPER 2 [Populus trichocarpa])	GO:0046983(molecular_function:protein dimerization activity); GO:0003677(molecular_function:DNA binding)				ENOG410ZT99(S:Function unknown); ENOG4111T8J(S:Function unknown)	ENOG410ZT99(Pfam:hATC); ENOG4111T8J(transposon protein)	PF14372.6(DUF4413:Domain of unknown function (DUF4413))	sp|Q6AVI0|RSLE2_ORYSJ(Zinc finger BED domain-containing protein RICESLEEPER 2 OS=Oryza sativa subsp. japonica OX=39947 GN=Os03g0733400 PE=2 SV=1)
MSTRG.15011			1013	36	6	30	62	17	9	39	38	53	4	25	95	12	20	4	27	7	14	87	26	10	19	48	24	5	26	28	35.3333	6.3333	65	31.3333	12	25.6667	7.3333	54.3333	19.6667	PNT22621.1(hypothetical protein POPTR_008G040900 [Populus trichocarpa])	GO:0016021(cellular_component:integral component of membrane)
MSTRG.15025			482	2	0	0	0	3	1	0	0	3	0	0	0	5	0	1	1	0	1	0	4	0	0	0	0	2	2	2	2.6667	0.3333	0	0	2	1.6667	0.6667	0.6667	1
MSTRG.15026			793	39	2	2	1	18	8	7	1	25	4	8	0	5	10	4	34	14	2	0	22	10	9	1	29	12	7	0	27.3333	4.6667	0.6667	5.6667	6.3333	28.3333	12	0.3333	6	PNT22647.1(hypothetical protein POPTR_008G042200 [Populus trichocarpa])	GO:0005674(cellular_component:transcription factor TFIIF complex); GO:0006367(biological_process:transcription initiation from RNA polymerase II promoter)	K03139	TFIIF2, GTF2F2, TFG2	map03022(Basal transcription factors)	COG5090(S:Function unknown)	COG5090(-)
MSTRG.1505			398	0	2.4	0	0	0	2.42	0	0	0	0	0	0	0	0	0	0	0	0	0	0	0	0	0	0	0	0	0	0	1.6067	0	0	0	0	0	0	0	PNT55291.1(hypothetical protein POPTR_001G184400, partial [Populus trichocarpa])	GO:0016620(molecular_function:oxidoreductase activity, acting on the aldehyde or oxo group of donors, NAD or NADP as acceptor); GO:0016491(molecular_function:oxidoreductase activity)	K00294	E1.2.1.88	map00250(Alanine, aspartate and glutamate metabolism); map00330(Arginine and proline metabolism)	COG4230(E:Amino acid transport and metabolism); COG1012(E:Amino acid transport and metabolism)	COG4230(proline dehydrogenase, pyrroline-5-carboxylate dehydrogenase); COG1012(proline dehydrogenase, pyrroline-5-carboxylate dehydrogenase)		sp|Q40255|ALDH_LINUS(Probable aldehyde dehydrogenase OS=Linum usitatissimum OX=4006 GN=FIS1 PE=2 SV=1)
MSTRG.15057			222	0	2.33	0	0	0	7.97	0	0.98	0	3.91	0	3.96	3.89	1.99	1.79	0	3.25	1	0.94	0	0	1	1.99	0.47	4.32	1	0.96	0	4.7367	1.6467	0	2.5567	0.1567	2.5233	1.2967	1	PNX93464.1(hypothetical protein L195_g016618 [Trifolium pratense])	GO:0000943(cellular_component:retrotransposon nucleocapsid); GO:0043531(molecular_function:ADP binding)				COG2801(L:Replication, recombination and repair)	COG2801(Retrotransposon protein)		sp|Q94HW2|POLR1_ARATH(Retrovirus-related Pol polyprotein from transposon RE1 OS=Arabidopsis thaliana OX=3702 GN=RE1 PE=2 SV=1)
MSTRG.1506			1064	3.45	25.22	8.45	27.19	1	18.31	6.49	20.24	9.36	25.6	9.84	29.79	71.71	38.88	88.19	9.84	71.6	5.01	33.58	8.13	48.38	7.24	37.14	10.53	57.57	10.09	19.08	4.6033	23.0433	25.74	8.26	66.26	9.5	59.1833	29.9333	7.4467	PNT55293.1(hypothetical protein POPTR_001G184600 [Populus trichocarpa])	GO:0005525(molecular_function:GTP binding)				COG0138(F:Nucleotide transport and metabolism); COG0144(J:Translation, ribosomal structure and biogenesis)	COG0138(bifunctional purine biosynthesis protein PURH); COG0144(nOP2 Sun)		sp|O23755|EF2_BETVU(Elongation factor 2 OS=Beta vulgaris OX=161934 PE=2 SV=1)
MSTRG.15081			1132	80	84	60	112	76	133	106	106	87	125	92	126	178	154	164	105	209	127	111	97	172	131	136	139	229	136	106	81	114	114.667	86	165.333	113.667	203.333	117.667	131.333	XP_006379566.2(putative transferase At4g12130, mitochondrial [Populus trichocarpa] )	GO:0005759(cellular_component:mitochondrial matrix); GO:0008168(molecular_function:methyltransferase activity); GO:0016226(biological_process:iron-sulfur cluster assembly)				COG0354(S:Function unknown)	COG0354(Folate-binding protein involved in regulating the level of ATP-DnaA and in the modification of some tRNAs. It is probably a key factor in regulatory networks that act via tRNA modification, such as initiation of chromosomal replication (By similarity))		sp|Q8L733|Y4121_ARATH(Putative transferase At4g12130, mitochondrial OS=Arabidopsis thaliana OX=3702 GN=At4g12130 PE=1 SV=1)
MSTRG.15101			1851	73	88	90	148	74	122	99	164	118	136	107	145	78	83	67	114	89	90	143	70	96	77	174	65	83	97	117	88.3333	115.333	152.333	98.6667	76	83	89.3333	144.667	88	XP_002311148.1(protein ALP1-like [Populus trichocarpa])	GO:0043565(molecular_function:sequence-specific DNA binding)				ENOG411206Y(S:Function unknown)	ENOG411206Y(function DUF966 domain containing protein, expressed)	PF13359.6(DDE_Tnp_4:DDE superfamily endonuclease); PF04827.14(Plant_tran:Plant transposon protein); PF13613.6(HTH_Tnp_4:Helix-turn-helix of DDE superfamily endonuclease)	sp|Q9M2U3|ALPL_ARATH(Protein ALP1-like OS=Arabidopsis thaliana OX=3702 GN=At3g55350 PE=2 SV=1)
MSTRG.15153			517	22	5	14	34	12	10	21	38	32	20	25	63	71	99	100	56	34	40	43	63	64	47	60	75	99	46	27	22	11.6667	45	20	90	64.6667	65.6667	43.3333	44.3333
MSTRG.15167			224	0	0	0	0	0	0	0	0	0	0	0	0	0	0	0	0	0	0	0	0	0	0	0	0	0	0	0	0	0	0	0	0	0	0	0	0
MSTRG.15168			236	0	0	0	1	0	0	1	2	0	0	0	0	1	1	0	0	0	2	0	0	0	0	0	5	2	0	1	0	0	1	0.3333	0.6667	1.6667	0.6667	0.3333	0.6667
MSTRG.15171			509	18	20	17	19	17	28	19	35	16	18	18	23	9	19	17	24	26	20	24	12	21	28	23	17	14	10	13	17	22	25.6667	18	15	17.6667	20.3333	20	19.3333
MSTRG.15196			328	0	0	1	0	0	0	1	0	1	0	0	0	0	0	0	0	0	2	0	1	0	0	0	0	0	3	0	0.3333	0	0	0.6667	0	0.3333	0	0	1.6667	PSR93232.1(Laccase-12 like [Actinidia chinensis var. chinensis])	GO:0048046(cellular_component:apoplast); GO:0052716(molecular_function:hydroquinone:oxygen oxidoreductase activity); GO:0046274(biological_process:lignin catabolic process); GO:0005507(molecular_function:copper ion binding); GO:0055114(biological_process:oxidation-reduction process)	K05909	E1.10.3.2		COG2132(S:Function unknown)	COG2132(Solute carrier family 25)		sp|Q9FLB5|LAC12_ARATH(Laccase-12 OS=Arabidopsis thaliana OX=3702 GN=LAC12 PE=2 SV=1)
MSTRG.15197			594	7	3	12	0	2	2	4	0	8	0	5	2	2	0	0	5	3	9	0	2	0	5	1	10	3	1	3	5.6667	1.6667	0.6667	7	0.6667	5.6667	2	1.3333	5
MSTRG.15198			204	1	0	0	1	0	1	0	0	0	1	1	0	0	0	0	0	0	0	0	1	0	0	0	0	0	0	0	0.3333	0.6667	0.3333	0.3333	0	0.3333	0	0	0
MSTRG.15307			292	7	2	3	2	7	1	0	0	11	0	3	3	4	7	3	16	10	2	4	17	2	0	2	17	7	0	3	8.3333	1	1.6667	2	4.6667	16.6667	6.3333	3	0.6667	XP_024440956.1(uncharacterized protein LOC112324115 [Populus trichocarpa])					ENOG411206Y(U:Intracellular trafficking, secretion, and vesicular transport)	ENOG411206Y(Prenylated RAB acceptor)	PF13359.6(DDE_Tnp_4:DDE superfamily endonuclease)
MSTRG.1531			300	5.08	1	2.4	6.27	2.21	1.06	5.63	2.36	2.26	1.46	3.46	4.4	1.07	1.07	1.26	3.38	0	1	1.17	0	1.01	3.19	2.88	1.38	1.1	4.7	0	3.1833	1.1733	4.3433	3.83	1.1333	1.5867	0.7033	1.35	2.9633	RQP00142.1(hypothetical protein POPTR_014G138700 [Populus trichocarpa])					ENOG410ZJIN(S:Function unknown); ENOG410Z7Z7(S:Function unknown); ENOG410ZJHJ(S:Function unknown)	ENOG410ZJIN(RPR); ENOG410Z7Z7(RPR); ENOG410ZJHJ(RPR)
MSTRG.15332			679	8	5	25	20	11	11	27	16	3	13	24	13	8	20	27	22	10	18	12	8	13	12	15	11	15	13	21	7.3333	9.6667	16.3333	25.3333	18.3333	13.6667	12.6667	16	14.3333	TKS07627.1(hypothetical protein D5086_0000110930 [Populus alba])	GO:0000123(cellular_component:histone acetyltransferase complex)				ENOG410Y1DG(E:Amino acid transport and metabolism); ENOG410Y1DG(G:Carbohydrate transport and metabolism)	ENOG410Y1DG(membrane); ENOG410Y1DG(membrane)
MSTRG.15333			635	1	0	1	4	0	1	2	3	0	4	2	0	0	2	3	3	3	5	4	0	0	7	3	2	0	1	2	0.3333	1.6667	2.3333	1.6667	1.6667	1.6667	1	3	4.3333
MSTRG.15334			700	22	20	26	20	20	32	13	16	17	28	21	27	66	21	32	30	29	13	9	15	28	19	33	39	60	27	14	19.6667	26.6667	21	20	39.6667	28	39	18.6667	19.6667	PNT23358.1(hypothetical protein POPTR_008G077600 [Populus trichocarpa])
MSTRG.15368			730	6	10	12	10	10	11	18	7	18	20	12	9	25	29	27	12	24	8	4	4	13	14	11	26	18	26	5	11.3333	13.6667	8.6667	14	27	14	18.3333	6.6667	16	XP_024462546.1(succinate-semialdehyde dehydrogenase, mitochondrial isoform X1 [Populus trichocarpa] )	GO:0016620(molecular_function:oxidoreductase activity, acting on the aldehyde or oxo group of donors, NAD or NADP as acceptor)				COG1012(K:Transcription)	COG1012(MYB family transcription factor)
MSTRG.1537			207	0	0	0	0	0	2	0	0	0	2	0	0	3	0	0	0	1	0	0	3	0	0	0	0	8	0	0	0	1.3333	0	0	1	1	3	0	0	ABG37655.1(integrase [Populus trichocarpa])	GO:0015074(biological_process:DNA integration); GO:0003676(molecular_function:nucleic acid binding)
MSTRG.15413			1631	18	19	8	9	12	19	16	11	27	15	16	7	25	41	33	31	24	22	4	24	18	13	14	27	29	9	17	19	17.6667	9	13.3333	33	27.3333	23.6667	11.6667	14.6667	TKS02888.1(hypothetical protein D5086_0000156790 [Populus alba])	GO:0016829(molecular_function:lyase activity); GO:0050660(molecular_function:flavin adenine dinucleotide binding); GO:0016614(molecular_function:oxidoreductase activity, acting on CH-OH group of donors); GO:0046593(molecular_function:mandelonitrile lyase activity)				COG2303(J:Translation, ribosomal structure and biogenesis)	COG2303(This is one of the proteins that binds and probably mediates the attachment of the 5S RNA into the large ribosomal subunit, where it forms part of the central protuberance (By similarity))	PF05199.13(GMC_oxred_C:GMC oxidoreductase)	sp|Q9S746|HTH_ARATH(Protein HOTHEAD OS=Arabidopsis thaliana OX=3702 GN=HTH PE=1 SV=1)
MSTRG.15480			405	2	1	2	21	4	2	5	17	1	0	8	6	3	5	1	0	2	14	7	1	2	6	19	1	3	9	3	2.3333	1	14.6667	5	3	0.6667	2.3333	9.6667	9.6667	APR63788.1(hypothetical protein [Populus tomentosa] )	GO:0016021(cellular_component:integral component of membrane); GO:0031625(molecular_function:ubiquitin protein ligase binding); GO:0005783(cellular_component:endoplasmic reticulum); GO:0030433(biological_process:ER-associated ubiquitin-dependent protein catabolic process)				ENOG410XQSH(O:Posttranslational modification, protein turnover, chaperones)	ENOG410XQSH(ER lipid raft associated)		sp|Q6DKC0|ERL2B_XENLA(Erlin-2-B OS=Xenopus laevis OX=8355 GN=erlin2-b PE=2 SV=1)
MSTRG.1554			268	0	0	0	0	0	0	0	0	4	0	1	0	1	1	3	0	0	0	0	0	0	0	0	0	0	0	0	1.3333	0	0	0.3333	1.6667	0	0	0	0
MSTRG.15572			869	7	8	9	14	1	9	5	20	5	8	2	12	6	6	3	11	5	4	10	6	5	2	8	3	3	4	10	4.3333	8.3333	15.3333	5.3333	5	6.6667	4.3333	9.3333	3.3333	TKS02147.1(BTB/POZ domain-containing protein [Populus alba])					ENOG410YF5P(S:Function unknown)	ENOG410YF5P(BTB POZ domain-containing protein)		sp|Q94A73|Y5656_ARATH(BTB/POZ domain-containing protein At5g66560 OS=Arabidopsis thaliana OX=3702 GN=At5g66560 PE=2 SV=2)
MSTRG.15601			301	0	0	0	2	0	0	0	3	0	0	0	1	0	0	0	0	0	0	1	0	0	0	1	0	0	0	0	0	0	2	0	0	0	0	0.6667	0	PNT23987.1(hypothetical protein POPTR_008G110200 [Populus trichocarpa])
MSTRG.15608			411	6	5	2.44	4	3	3	5	3	4	7	5	5	6	6	11	5	5.55	7.43	9	8	1	6	4	1	1	8	4	4.3333	5	4	4.1467	7.6667	4.6667	2.5167	5.6667	7.1433	PNT23998.1(hypothetical protein POPTR_008G110900, partial [Populus trichocarpa])	GO:0008270(molecular_function:zinc ion binding)	K17808	ZIM17, DNLZ, Tim15		ENOG41121WI(T:Signal transduction mechanisms)	ENOG41121WI(Xenotropic and polytropic retrovirus receptor 1)	PF05180.12(zf-DNL:DNL zinc finger)
MSTRG.15633			391	0	1	0	1	0	0	0	0	1	0	0	0	0	0	0	0	1	0	1	0	0	0	1	0	1	0	1	0.3333	0.3333	0.3333	0	0	0	0.6667	1	0
MSTRG.15656			322	0	4	4	0	0	6	1	1	0	1	2	0	1	3	2	1	8	3	2	1	1	3	1	2	1	0	1	0	3.6667	0.3333	2.3333	2	1.3333	3.3333	1.3333	2
MSTRG.15657			505	23	21	21	32	16	25	36	17	31	24	31	21	17	22	10	28	18	26	23	20	28	29	27	21	27	19	12	23.3333	23.3333	23.3333	29.3333	16.3333	23	24.3333	20.6667	24.6667
MSTRG.15659			1450	12	1	21	20	8	1	22	15	14	3	17	13	9	10	4	4	2	22	20	7	18	25	17	20	8	27	8	11.3333	1.6667	16	20	7.6667	10.3333	9.3333	15	24.6667	PNT24094.1(hypothetical protein POPTR_008G116200 [Populus trichocarpa])	GO:0008270(molecular_function:zinc ion binding)				ENOG410ZJWA(S:Function unknown)	ENOG410ZJWA(-)
MSTRG.15660			374	0	0	0	0	0	0	1	0	0	0	3	3	0	0	1	0	0	0	1	0	0	1	0	3	0	2	0	0	0	1	1.3333	0.3333	1	0	0.3333	1	TKR84971.1(hypothetical protein D5086_0000253240 [Populus alba])	GO:0008270(molecular_function:zinc ion binding); GO:0003676(molecular_function:nucleic acid binding)				ENOG410ZJWA(S:Function unknown)	ENOG410ZJWA(-)
MSTRG.15698			224	2	4	4	0	3	1	2	1	4	1	1	0	1	4.78	5	4	0	1	3	3	0	2	1	1	2	1.01	3	3	2	0.3333	2.3333	3.5933	2.6667	0.6667	2.3333	1.3367
MSTRG.1570			328	1	0	1	1.19	0	1.97	0.87	1.99	1	2	0	3	0	0.94	2.2	4	1	3.2	1.93	5.42	2.51	0	1.17	2.58	4.73	1	0	0.6667	1.3233	2.06	0.6233	1.0467	4	2.7467	1.0333	1.4	TKR90631.1(hypothetical protein D5086_0000231220 [Populus alba])					ENOG4111SPB(S:Function unknown); ENOG4111XVU(S:Function unknown)	ENOG4111SPB(transposon protein); ENOG4111XVU(transposon protein)	PF02892.15(zf-BED:BED zinc finger)
MSTRG.1571			696	14.4	6.5	11.37	9.38	8.44	10.05	10.06	22.61	9.16	9.6	12.02	9.99	16.03	29.15	15.68	13.63	9.15	19.02	16.09	10.8	7.34	19.31	19.82	23.05	18.51	17.85	17.82	10.6667	8.7167	13.9933	11.15	20.2867	15.8267	11.6667	17.91	18.7267	XP_024437166.1(uncharacterized protein LOC112323389 [Populus trichocarpa])					ENOG4111SPB(S:Function unknown); ENOG4111XVU(S:Function unknown)	ENOG4111SPB(transposon protein); ENOG4111XVU(-)	PF04937.15(DUF659:Protein of unknown function (DUF 659))
MSTRG.15734			443	153	28	47	23	80	42	33	17	111	22	36	7	42	80	37	116	75	46	10	66	29	33	8	65	72	25	14	114.667	30.6667	15.6667	38.6667	53	82.3333	58.6667	10.6667	34.6667
MSTRG.15737			592	8	1	13	8	12	4	21	25	11	0	14	7	0	1	0	7	3	9	7	5	7	15	4	6	0	20	9	10.3333	1.6667	13.3333	16	0.3333	6	3.3333	6.6667	14.6667	PNT16048.1(hypothetical protein POPTR_010G118400 [Populus trichocarpa])
MSTRG.15742			205	0	0	0	0	0	0	0	0	0	0	0	0	0	0	0	0	0	0	0	0	0	3	0	0	0	0	0	0	0	0	0	0	0	0	0	1	RDX90517.1(DExH-box ATP-dependent RNA helicase DExH5, mitochondrial, partial [Mucuna pruriens])	GO:0003676(molecular_function:nucleic acid binding); GO:0016021(cellular_component:integral component of membrane); GO:0003723(molecular_function:RNA binding); GO:0005524(molecular_function:ATP binding); GO:0004386(molecular_function:helicase activity)	K14442	DHX36, RHAU	map03018(RNA degradation)	COG1643(O:Posttranslational modification, protein turnover, chaperones)	COG1643(Procollagen-lysine 2-oxoglutarate 5-dioxygenase)		sp|F4IM84|DEXH5_ARATH(DExH-box ATP-dependent RNA helicase DExH5, mitochondrial OS=Arabidopsis thaliana OX=3702 GN=At2g01130 PE=3 SV=1)
MSTRG.15743			653	36	16	87	14	30	20	84	17	51	19	60	10	12	16	10	39	11	82	19	36	25	65	14	37	21	71	18	39	18.3333	13.6667	77	12.6667	37.3333	19	17	72.6667	TKR84885.1(hypothetical protein D5086_0000252380 [Populus alba])
MSTRG.15746			394	1	0	1	4	4	4	0	0	3	2	0	0	2	3	0	4	3	0	0	5	1	0	2	7	2	0	1	2.6667	2	1.3333	0.3333	1.6667	5.3333	2	1	0
MSTRG.1576			374	0	1	7	5	1	2	0	3	5	3	3	2	4	13	4	4	2	5	2	8	4	5	3	7	5	7	3	2	2	3.3333	3.3333	7	6.3333	3.6667	2.6667	5.6667
MSTRG.15767			412	1	1	1	1	3	9	1	5	2	0	0	0	3	6	2	2	4	2	0	0	5	2	3	1	7	1	4	2	3.3333	2	0.6667	3.6667	1	5.3333	2.3333	1.6667	RQO94597.1(hypothetical protein POPTR_008G128650 [Populus trichocarpa])
MSTRG.1577			228	0	0	0	0	0.72	1.9	0	0	0	0	0	0	0.71	4.8	0	0	0	0	0	0	0	0	0	1	2.47	0	0	0.24	0.6333	0	0	1.8367	0.3333	0.8233	0	0	XP_024463329.1(uncharacterized protein LOC112328490 [Populus trichocarpa])	GO:0015074(biological_process:DNA integration); GO:0003676(molecular_function:nucleic acid binding)						PF00665.26(rve:Integrase core domain)	sp|Q2F7J3|POL_XMRV3(Gag-Pol polyprotein OS=Xenotropic MuLV-related virus (isolate VP35) OX=356663 GN=gag-pol PE=1 SV=1)
MSTRG.1578			241	0	1	1	2	0	0	0	3	0	0	1	1	1	4	0	0	2	0	1	0	1	1	0	2	1	1	0	0	0.3333	2	0.6667	1.6667	0.6667	1.3333	0.3333	0.6667	XP_024463329.1(uncharacterized protein LOC112328490 [Populus trichocarpa])
MSTRG.15799			870	70	44	22	1	59	45	9	1	58	54	23	3	54	56	55	70	78	24	2	40	42	18	1	56	73	14	2	62.3333	47.6667	1.6667	18	55	55.3333	64.3333	1.6667	18.6667	PNT24372.1(hypothetical protein POPTR_008G132000 [Populus trichocarpa])	GO:0009535(cellular_component:chloroplast thylakoid membrane); GO:0010598(cellular_component:NAD(P)H dehydrogenase complex (plastoquinone)); GO:0009773(biological_process:photosynthetic electron transport in photosystem I)				ENOG410Y74U(S:Function unknown)	ENOG410Y74U(-)
MSTRG.15854			324	1	0	0	0	1	0	1	3	0	0	0	0	0	0	0	0	0	0	1	0	0	0	2	0	1	0	4	0.6667	0	1	0.3333	0	0	0.3333	2.3333	0
MSTRG.15855			967	8	4	4	4	3	1	6	4	6	6	11	1	2	3	2	6	3	7	6	4	0	7	2	3	3	7	3	5.6667	3.6667	3	7	2.3333	4.3333	2	3.6667	7	RQO96521.1(hypothetical protein POPTR_010G102750 [Populus trichocarpa])
MSTRG.15856			806	2	4	4	6	5	4	6	2	7	2	9	7	2	3	2	11	2	4	4	2	2	3	5	1	0	3	3	4.6667	3.3333	5	6.3333	2.3333	4.6667	1.3333	4	3.3333
MSTRG.1587			286	9.61	7.91	14.99	13.68	6	6.94	6.99	14.99	8	8.93	22.67	12	1	7.47	4.87	13.85	4	17.41	13.97	6	2.86	17	11.93	11.17	5.58	22.93	7.97	7.87	7.9267	13.5567	14.8833	4.4467	10.34	4.1467	11.29	19.1133	TKS03870.1(hypothetical protein D5086_0000148990 [Populus alba])	GO:0046658(cellular_component:anchored component of plasma membrane); GO:0016021(cellular_component:integral component of membrane); GO:0005975(biological_process:carbohydrate metabolic process); GO:0004553(molecular_function:hydrolase activity, hydrolyzing O-glycosyl compounds)	K19891	GN1_2_3	map00500(Starch and sucrose metabolism)	ENOG410YEGG(G:Carbohydrate transport and metabolism)	ENOG410YEGG(glucan endo-1-3-beta-glucosidase)
MSTRG.15878			1138	96	78	83	47	85	110	136	52	113	125	119	56	129	114	136	125	174	149	59	114	164	133	58	138	189	116	31	98	104.333	51.6667	112.667	126.333	125.667	175.667	49.3333	132.667	PNT24561.1(hypothetical protein POPTR_008G140600 [Populus trichocarpa])	GO:0016021(cellular_component:integral component of membrane); GO:0016020(cellular_component:membrane); GO:0072657(biological_process:protein localization to membrane)				ENOG410XSVB(S:Function unknown)	ENOG410XSVB(transmembrane 9 superfamily member)	PF02990.16(EMP70:Endomembrane protein 70)	sp|Q940S0|TMN2_ARATH(Transmembrane 9 superfamily member 2 OS=Arabidopsis thaliana OX=3702 GN=TMN2 PE=2 SV=1)
MSTRG.15881			600	3	0	2	8	13	1	2	12	6	1	24	5	0	0	0	8	0	2	4	3	0	0	5	8	0	3	26	7.3333	0.6667	8.3333	9.3333	0	6.3333	0	11.6667	1.6667
MSTRG.15935			1520	276	133	213	166	204	115	221	184	270	140	306	207	117	184	120	245	146	260	163	180	143	299	193	238	175	274	131	250	129.333	185.667	246.667	140.333	221	154.667	162.333	277.667	XP_024463050.1(uncharacterized protein LOC7471483 isoform X2 [Populus trichocarpa] )	GO:0004523(molecular_function:RNA-DNA hybrid ribonuclease activity); GO:0003676(molecular_function:nucleic acid binding)				COG0328(L:Replication, recombination and repair)	COG0328(ribonuclease H activity)	PF13456.6(RVT_3:Reverse transcriptase-like); PF00075.24(RNase_H:RNase H)	sp|P9WLH5|RNHPH_MYCTU(Bifunctional protein Rv2228c OS=Mycobacterium tuberculosis (strain ATCC 25618 / H37Rv) OX=83332 GN=Rv2228c PE=1 SV=1)
MSTRG.1595			266	0	0	0	0	1	0	0	0	0	1	2	0	0	0	0	2	0	3	0	4	2	1	0	2	3	2	0	0.3333	0.3333	0	0.6667	0	2.6667	1.6667	0	2
MSTRG.15951			207	0	0	0	0	0	0	0	0	0	0	0	0	0	0	0	0	0	0	0	0	0	0	0	0	0	0	0	0	0	0	0	0	0	0	0	0	RQO94699.1(hypothetical protein POPTR_008G148700 [Populus trichocarpa])
MSTRG.15967			200	1	0	0	0	0	0	0	0	0	0	0	0	0	2	0	1	0	0	0	1	0	0	0	0	0	0	0	0.3333	0	0	0	0.6667	0.6667	0	0	0	TKR83656.1(hypothetical protein D5086_0000264270 [Populus alba])	GO:0016021(cellular_component:integral component of membrane)
MSTRG.160			2086	153.47	102	217	575	138	62	244	391.41	171	93	221	441	120	120	132	133.83	121	229.44	410.47	168	117	207	424	167	124	179	321	154.157	85.6667	469.137	227.333	124	156.277	120.667	385.157	205.147	XP_011037802.1(PREDICTED: probable glycerol-3-phosphate dehydrogenase [NAD(+)] 1, cytosolic [Populus euphratica])	GO:0004367(molecular_function:glycerol-3-phosphate dehydrogenase [NAD+] activity); GO:0005975(biological_process:carbohydrate metabolic process); GO:0009331(cellular_component:glycerol-3-phosphate dehydrogenase complex); GO:0046168(biological_process:glycerol-3-phosphate catabolic process); GO:0051287(molecular_function:NAD binding); GO:0005829(cellular_component:cytosol); GO:0006116(biological_p…	K00006	GPD1	map00564(Glycerophospholipid metabolism)	COG0240(C:Energy production and conversion)	COG0240(glycerol-3-phosphate dehydrogenase)	PF07479.14(NAD_Gly3P_dh_C:NAD-dependent glycerol-3-phosphate dehydrogenase C-terminus); PF01210.23(NAD_Gly3P_dh_N:NAD-dependent glycerol-3-phosphate dehydrogenase N-terminus)	sp|Q8S0G4|GPDH1_ORYSJ(Probable glycerol-3-phosphate dehydrogenase [NAD(+)] 1, cytosolic OS=Oryza sativa subsp. japonica OX=39947 GN=Os01g0939600 PE=2 SV=1)
MSTRG.16058			797	18	26	5	28	16	30	2	31	10	19	0	23	10	18	12	15	18	3	18	8	12	0	33	14	21	0	15	14.6667	25	27.3333	2.3333	13.3333	12.3333	17	22	1
MSTRG.1606			613	2	2	4	2	9	0	9	0	5	2	6	4	0	3	1	0	5	7	1	4	0	21	4	6	1	7	2	5.3333	1.3333	2	6.3333	1.3333	3.3333	2	2.3333	11.6667
MSTRG.16080			280	0	0	1	1	0	0	0	1	0	0	0	2	0	0	0	0	0	0	0	0	0	2	2	0	0	0	2	0	0	1.3333	0.3333	0	0	0	1.3333	0.6667	RQO94781.1(hypothetical protein POPTR_008G164532 [Populus trichocarpa])
MSTRG.16084			1730	17.08	13.02	19.71	7.02	18.59	0	53.44	12.93	24.82	7.43	47.08	7.24	14	27.85	13.6	5.19	10.71	36.02	10.94	13.05	13.83	46.4	16.51	21.58	3.63	44.38	12.83	20.1633	6.8167	9.0633	40.0767	18.4833	13.2733	9.39	13.4267	42.2667	XP_015580945.1(DNA repair protein RAD5B isoform X2 [Ricinus communis])	GO:0016818(molecular_function:hydrolase activity, acting on acid anhydrides, in phosphorus-containing anhydrides); GO:0004386(molecular_function:helicase activity); GO:0016740(molecular_function:transferase activity); GO:0008270(molecular_function:zinc ion binding); GO:0003676(molecular_function:nucleic acid binding); GO:0005524(molecular_function:ATP binding)	K15505	RAD5		COG0553(L:Replication, recombination and repair); ENOG410XPDU(L:Replication, recombination and repair)	COG0553(helicase); ENOG410XPDU(helicase)		sp|Q9FIY7|SM3L3_ARATH(DNA repair protein RAD5B OS=Arabidopsis thaliana OX=3702 GN=RAD5B PE=3 SV=1)
MSTRG.16085			863	15.69	5.29	26.26	4.03	11.97	8.57	40.45	8.64	10.16	13.45	27.08	3.64	6	14.9	1.64	4.72	10.8	28.11	13.54	4.91	5.69	37.09	2.39	24.43	0	33.27	18.59	12.6067	9.1033	5.4367	31.2633	7.5133	11.3533	5.4967	11.5067	32.8233	TKR83777.1(hypothetical protein D5086_0000265480 [Populus alba])	GO:0016740(molecular_function:transferase activity); GO:0008270(molecular_function:zinc ion binding); GO:0003676(molecular_function:nucleic acid binding); GO:0005524(molecular_function:ATP binding); GO:0004386(molecular_function:helicase activity)
MSTRG.16098			371	10	2	30	10	11	4	38	6	9	12	28	10	5	11	3	9	18	39	2	13	17	44	17	18	5	46	2	10	6	8.6667	32	6.3333	13.3333	13.3333	7	43	XP_028949318.1(uncharacterized protein LOC114821401 [Malus domestica])	GO:0000943(cellular_component:retrotransposon nucleocapsid); GO:0015074(biological_process:DNA integration); GO:0008270(molecular_function:zinc ion binding); GO:0003676(molecular_function:nucleic acid binding)						PF16588.5(zf-C2H2_10:C2H2 zinc-finger)
MSTRG.161			378	10	2	7	5	3	4	11	2	12	6	5	7	0	2	10.54	6	3	14	8	6	6	6	5	6	5	8	3	8.3333	4	4.6667	7.6667	4.18	6	4.6667	5.3333	9.3333
MSTRG.16137			229	0	0	1	0	0	1	1	0	0	0	4	0	0	0	0	0	0	6	0	0	0	1	0	1	0	0	0	0	0.3333	0	2	0	0.3333	0	0	2.3333
MSTRG.16153			539	23.98	5.39	5.1	219.95	5.24	12.13	10	220.69	4.97	5.38	10	202.83	9	7.53	10.97	11.11	10.18	3.94	152.34	5.91	8.62	8.85	197.17	13.85	22.77	15.66	211.16	11.3967	7.6333	214.49	8.3667	9.1667	10.29	13.8567	186.89	9.4833	TEY43238.1(hypothetical protein Saspl_036583 [Salvia splendens])	GO:0000943(cellular_component:retrotransposon nucleocapsid); GO:0015074(biological_process:DNA integration); GO:0004491(molecular_function:methylmalonate-semialdehyde dehydrogenase (acylating) activity); GO:0008270(molecular_function:zinc ion binding); GO:0003676(molecular_function:nucleic acid binding)				COG2801(L:Replication, recombination and repair); ENOG410ZXEB(S:Function unknown)	COG2801(Retrotransposon protein); ENOG410ZXEB(Integrase core domain)		sp|P10978|POLX_TOBAC(Retrovirus-related Pol polyprotein from transposon TNT 1-94 OS=Nicotiana tabacum OX=4097 PE=2 SV=1)
MSTRG.16154			300	0	1.6	4.06	28.16	0.68	0	0.65	24.73	0	0.35	1	17.89	0.73	0.29	0	1.43	0	0	26.12	0	1.18	0	24.05	2.44	2.99	0.96	30.55	0.2267	0.65	23.5933	1.9033	0.34	1.29	1.39	26.9067	0.32	XP_024445362.1(uncharacterized protein LOC112324933 [Populus trichocarpa])	GO:0000943(cellular_component:retrotransposon nucleocapsid); GO:0015074(biological_process:DNA integration); GO:0008270(molecular_function:zinc ion binding); GO:0003676(molecular_function:nucleic acid binding)
MSTRG.1617			295	1	0	4.59	4.12	0.95	0	2.48	4.05	0	0	2	5.12	0	1	0	1.12	0	0	6.73	0.98	0.61	0	7.62	0	1.88	1.48	2.06	0.65	0	4.43	3.0233	0.3333	0.7	0.83	5.47	0.4933	XP_024453248.1(uncharacterized protein LOC112326930 [Populus trichocarpa])	GO:0016779(molecular_function:nucleotidyltransferase activity); GO:0005840(cellular_component:ribosome); GO:0005634(cellular_component:nucleus); GO:0004523(molecular_function:RNA-DNA hybrid ribonuclease activity); GO:0015074(biological_process:DNA integration); GO:0003676(molecular_function:nucleic acid binding); GO:0008168(molecular_function:methyltransferase activity)
MSTRG.1624			1962	549	464	451	526	420	481	438	533	620	473	508	476	495	548	538	542	577	508	494	478	511	529	536	600	605	545	422	529.667	472.667	511.667	465.667	527	540	564.333	484	527.333	XP_011011326.1(PREDICTED: serine/threonine-protein phosphatase 7 long form homolog [Populus euphratica] )					ENOG410YC97(S:Function unknown)	ENOG410YC97(Serine threonine-protein phosphatase 7 long form)	PF10536.9(PMD:Plant mobile domain)	sp|F4IFD0|MAIL2_ARATH(Protein MAIN-LIKE 2 OS=Arabidopsis thaliana OX=3702 GN=At2g04865 PE=1 SV=1)
MSTRG.16283			1090	24.05	7.46	16.36	12.27	15.76	9.08	17.32	14.22	35.78	5.8	16.08	9.41	3.58	15.09	6.19	24.32	10.6	24.28	17.31	12.71	6.17	21.73	9.78	30.24	9.59	24.65	3.19	25.1967	7.4467	11.9667	16.5867	8.2867	22.4233	8.7867	10.0933	23.5533	PNS22112.1(hypothetical protein POPTR_T171400, partial [Populus trichocarpa])	GO:0006298(biological_process:mismatch repair); GO:0005524(molecular_function:ATP binding); GO:0030983(molecular_function:mismatched DNA binding)	K08737	MSH6	map03430(Mismatch repair)	COG0249(S:Function unknown)	COG0249(-)		sp|O04716|MSH6_ARATH(DNA mismatch repair protein MSH6 OS=Arabidopsis thaliana OX=3702 GN=MSH6 PE=1 SV=2)
MSTRG.16285			368	19.36	4	15.08	2.49	14.47	8.07	12.79	1.29	21.12	10.52	18.27	6.33	9.07	12.96	7.98	8.02	7	27.65	5.94	16.23	6	19.85	9.99	21.91	6.65	10.97	4	18.3167	7.53	3.37	15.38	10.0033	15.3867	6.55	6.6433	19.49	RQO94933.1(hypothetical protein POPTR_008G191001 [Populus trichocarpa])	GO:0016021(cellular_component:integral component of membrane); GO:0006298(biological_process:mismatch repair); GO:0005524(molecular_function:ATP binding); GO:0030983(molecular_function:mismatched DNA binding)	K08737	MSH6	map03430(Mismatch repair)	COG0249(L:Replication, recombination and repair)	COG0249(that it carries out the mismatch recognition step. This protein has a weak ATPase activity (By similarity))		sp|O04716|MSH6_ARATH(DNA mismatch repair protein MSH6 OS=Arabidopsis thaliana OX=3702 GN=MSH6 PE=1 SV=2)
MSTRG.1629			262	0	0	0	0	0	1	2	1	0	0	2	4	0	0	0	1	0	2	1	0	0	3	0	2	0	2	0	0	0.3333	1.6667	1.3333	0	1	0	0.3333	2.3333	XP_011044873.1(PREDICTED: uncharacterized protein LOC105139931 isoform X1 [Populus euphratica])					ENOG41117JX(S:Function unknown)	ENOG41117JX(-)
MSTRG.163			609	8	2	1	0	0	3	2	2	2	0	2	1	2	2	4	0	2	4	4	2	0	3	1	7	5	4	1	3.3333	1.6667	1	1.6667	2.6667	3	2.3333	2	3.6667
MSTRG.16317			623	13	11	8	16	6	14	26	17	12	13	17	10	7	16	18	15	12	14	13	9	12	19	26	8	13	6	15	10.3333	12.6667	14.3333	17	13.6667	10.6667	12.3333	18	13	XP_011010794.1(PREDICTED: uncharacterized protein LOC105115567 [Populus euphratica] )
MSTRG.16338			210	4	0	2	2	3	0	5	5	3	2	3	3	2	3	1	5	1	0	3	4	1	4	3	7	1	6	1	3.3333	0.6667	3.3333	3.3333	2	5.3333	1	2.3333	3.3333
MSTRG.1636			564	199	135	223	191	220	226	235	182	264	194	183	183	199	174	153	220	165	201	170	198	168	203	196	229	207	211	173	227.667	185	185.333	213.667	175.333	215.667	180	179.667	205	XP_006369308.2(zinc finger BED domain-containing protein DAYSLEEPER isoform X1 [Populus trichocarpa] )					ENOG4111T8J(S:Function unknown); ENOG410Y37V(S:Function unknown)	ENOG4111T8J(transposon protein); ENOG410Y37V(transposon protein)	PF05699.14(Dimer_Tnp_hAT:hAT family C-terminal dimerisation region)	sp|Q9M2N5|DSLE_ARATH(Zinc finger BED domain-containing protein DAYSLEEPER OS=Arabidopsis thaliana OX=3702 GN=HAT PE=1 SV=1)
MSTRG.16364			3103	147	120	142	159	148	138	209	166	165	164	198	138	301	385	303	206	246	237	187	188	181	234	160	280	281	151	131	153.333	140.667	154.333	183	329.667	224.667	236	159.333	207.333	PNT25756.1(hypothetical protein POPTR_008G200200 [Populus trichocarpa])
MSTRG.1637			2406	576	298.81	552.91	526.94	460	412	577	417.99	631.22	379	546.73	428.39	484	470	422.59	533.91	509	557.18	480.91	444.6	403	623	439.91	736.79	458	578	328.68	555.74	363.27	457.773	558.88	458.863	571.767	456.667	416.5	586.06	XP_006369308.2(zinc finger BED domain-containing protein DAYSLEEPER isoform X1 [Populus trichocarpa] )					ENOG4111T8J(S:Function unknown); ENOG410Y37V(S:Function unknown)	ENOG4111T8J(transposon protein); ENOG410Y37V(transposon protein)	PF14372.6(DUF4413:Domain of unknown function (DUF4413))	sp|Q9M2N5|DSLE_ARATH(Zinc finger BED domain-containing protein DAYSLEEPER OS=Arabidopsis thaliana OX=3702 GN=HAT PE=1 SV=1)
MSTRG.1641			889	16	5	4	10	10	12	14	6	6	10	1	2	7	12	8	14	14	5	7	4	8	7	2	7	7	1	2	10.6667	9	6	6.3333	9	8.3333	9.6667	3.6667	4.3333	XP_024439064.1(uncharacterized protein LOC112323807 [Populus trichocarpa])	GO:0000326(cellular_component:protein storage vacuole); GO:0000943(cellular_component:retrotransposon nucleocapsid); GO:0016021(cellular_component:integral component of membrane); GO:0005802(cellular_component:trans-Golgi network); GO:0015074(biological_process:DNA integration); GO:0008270(molecular_function:zinc ion binding); GO:0003676(molecular_function:nucleic acid binding); GO:0006886(biolog…						PF03732.17(Retrotrans_gag:Retrotransposon gag protein); PF14223.6(Retrotran_gag_2:gag-polypeptide of LTR copia-type)
MSTRG.16412			3016	389	324	462	418	383	334	461	413	433	357	461	410	359	369	432	345	390	512	409	361	312	548	422	509	356	525	380	401.667	338.333	413.667	461.333	386.667	405	352.667	403.667	528.333	XP_024462926.1(uncharacterized protein LOC7481647 isoform X1 [Populus trichocarpa] )	GO:0008270(molecular_function:zinc ion binding)				ENOG410YFHW(J:Translation, ribosomal structure and biogenesis)	ENOG410YFHW(Formation of pseudouridine at positions 38, 39 and 40 in the anticodon stem and loop of transfer RNAs (By similarity))	PF03108.15(DBD_Tnp_Mut:MuDR family transposase); PF10551.9(MULE:MULE transposase domain); PF00564.24(PB1:PB1 domain); PF04434.17(SWIM:SWIM zinc finger)
MSTRG.16418			227	0	0	0	0	0	0	0	0	0	0	0	0	0	0	0	0	0	0	0	0	0	0	0	0	0	0	0	0	0	0	0	0	0	0	0	0	XP_022576162.1(uncharacterized protein LOC106373317 [Brassica napus])	GO:0015074(biological_process:DNA integration); GO:0008270(molecular_function:zinc ion binding); GO:0003676(molecular_function:nucleic acid binding)						PF00078.27(RVT_1:Reverse transcriptase (RNA-dependent DNA polymerase))	sp|P31843|RRPO_OENBE(RNA-directed DNA polymerase homolog OS=Oenothera berteroana OX=3950 PE=4 SV=1)
MSTRG.1642			287	0	0	0	1	0	1	0	2	1	0	0	0	1	0	0	8	0	0	0	0	4	0	1	0	0	1	1	0.3333	0.3333	1	0	0.3333	2.6667	1.3333	0.6667	0.3333	RVW16050.1(Retrovirus-related Pol polyprotein from transposon RE1 [Vitis vinifera])	GO:0000943(cellular_component:retrotransposon nucleocapsid); GO:0015074(biological_process:DNA integration); GO:0016021(cellular_component:integral component of membrane); GO:0008270(molecular_function:zinc ion binding); GO:0003676(molecular_function:nucleic acid binding)
MSTRG.16420			284	1	0	5	4	1	0	7	3	2	0	2	4	0	2	2	3	0	6	5	2	3	2	6	4	1	2	3	1.3333	0	3.6667	4.6667	1.3333	3	1.3333	4.6667	3.3333	RVW19408.1(Transposon Ty3-G Gag-Pol polyprotein [Vitis vinifera])	GO:0010581(biological_process:regulation of starch biosynthetic process); GO:0015074(biological_process:DNA integration); GO:0008270(molecular_function:zinc ion binding); GO:0003676(molecular_function:nucleic acid binding); GO:0019252(biological_process:starch biosynthetic process); GO:0009507(cellular_component:chloroplast)				COG2801(L:Replication, recombination and repair)	COG2801(Retrotransposon protein)	PF17921.1(Integrase_H2C2:Integrase zinc binding domain); PF09337.10(zf-H2C2:H2C2 zinc finger)
MSTRG.16421			203	0	0	0	0	0	0	0	0	2	0	1	0	3	0	0	0	0	0	0	0	0	0	0	0	0	0	0	0.6667	0	0	0.3333	1	0	0	0	0	ABG37658.1(integrase [Populus trichocarpa])	GO:0003964(molecular_function:RNA-directed DNA polymerase activity); GO:0015074(biological_process:DNA integration); GO:0016779(molecular_function:nucleotidyltransferase activity); GO:0004523(molecular_function:RNA-DNA hybrid ribonuclease activity); GO:0003676(molecular_function:nucleic acid binding)						PF00078.27(RVT_1:Reverse transcriptase (RNA-dependent DNA polymerase))
MSTRG.1644			460	0	1.13	0	3.88	0	1.19	0	3.95	1.22	1.11	0	7.1	1.4	0	1.18	5.23	1.2	2.6	1.13	2.47	0	0	0	2.28	0	1.18	3.68	0.4067	1.1433	4.9767	0	0.86	3.3267	0.4	1.6033	1.26	PNT55636.1(hypothetical protein POPTR_001G203100 [Populus trichocarpa])	GO:0004674(molecular_function:protein serine/threonine kinase activity); GO:0005524(molecular_function:ATP binding); GO:0004672(molecular_function:protein kinase activity)	K04733	IRAK4		COG0515(S:Function unknown)	COG0515(Domain-Containing protein)		sp|Q9LSC2|Y3589_ARATH(PTI1-like tyrosine-protein kinase At3g15890 OS=Arabidopsis thaliana OX=3702 GN=At3g15890 PE=2 SV=1)
MSTRG.16440			455	6	1	0	0	1	2	0	0	27	1	1	0	2	3	0	20	1	0	0	10	4	2	0	17	4	0	0	11.3333	1.3333	0	0.3333	1.6667	15.6667	3	0	0.6667	PNT26030.1(hypothetical protein POPTR_008G216300, partial [Populus trichocarpa])	GO:0016021(cellular_component:integral component of membrane); GO:0016298(molecular_function:lipase activity); GO:0006629(biological_process:lipid metabolic process); GO:0016788(molecular_function:hydrolase activity, acting on ester bonds)							sp|O23470|GDL64_ARATH(GDSL esterase/lipase At4g16230 OS=Arabidopsis thaliana OX=3702 GN=At4g16230 PE=3 SV=2)
MSTRG.16444			772	16	6	7	3	8	3	6	5	23	3	8	2	2	6	1	4	1	5	5	10	0	1	3	11	0	7	1	15.6667	4	3.3333	7	3	8.3333	0.3333	3	4.3333	PNT26020.1(hypothetical protein POPTR_008G215400 [Populus trichocarpa])	GO:0009706(cellular_component:chloroplast inner membrane); GO:0000287(molecular_function:magnesium ion binding); GO:0003924(molecular_function:GTPase activity); GO:0009658(biological_process:chloroplast organization); GO:0009793(biological_process:embryo development ending in seed dormancy); GO:0009416(biological_process:response to light stimulus); GO:0006364(biological_process:rRNA processing);…				COG0536(S:Function unknown)	COG0536(mitochondrial transcription termination)	PF01018.22(GTP1_OBG:GTP1/OBG)	sp|A2YPR8|OBGC1_ORYSI(Probable GTP-binding protein OBGC1, chloroplastic OS=Oryza sativa subsp. indica OX=39946 GN=OBGC1 PE=3 SV=1)
MSTRG.16453			1404	11.6	10.21	14.34	18.58	11.99	22.06	16.98	24.64	20.04	17.69	20.96	17.94	31.3	40.25	28.36	16.6	20.55	27.52	26.45	22	52.99	38.84	13.08	33.38	24.1	21.48	26.21	14.5433	16.6533	20.3867	17.4267	33.3033	23.9933	32.5467	21.9133	29.28	XP_024463329.1(uncharacterized protein LOC112328490 [Populus trichocarpa])	GO:0003887(molecular_function:DNA-directed DNA polymerase activity); GO:0015074(biological_process:DNA integration); GO:0003964(molecular_function:RNA-directed DNA polymerase activity); GO:0008270(molecular_function:zinc ion binding); GO:0003676(molecular_function:nucleic acid binding)						PF00665.26(rve:Integrase core domain); PF17921.1(Integrase_H2C2:Integrase zinc binding domain)	sp|P26810|POL_MLVF5(Gag-Pol polyprotein OS=Friend murine leukemia virus (isolate 57) OX=11796 GN=pol PE=3 SV=2)
MSTRG.1646			271	1	0	0.91	5.71	1.66	0	5.36	3.42	0	0	3.97	4.58	0	2	3.82	0	0	0	1.9	0.94	0	1.14	1.48	1	0	0	3	0.8867	0	4.57	3.4133	1.94	0.6467	0	2.1267	0.38	XP_024453248.1(uncharacterized protein LOC112326930 [Populus trichocarpa])	GO:0016779(molecular_function:nucleotidyltransferase activity); GO:0005840(cellular_component:ribosome); GO:0005634(cellular_component:nucleus); GO:0004523(molecular_function:RNA-DNA hybrid ribonuclease activity); GO:0015074(biological_process:DNA integration); GO:0003676(molecular_function:nucleic acid binding)
MSTRG.16483			304	0	0	0	0	1	0	6	2	1	0	1	1	1	1	0	0	0	1	0	0	0	0	0	0	0	1	2	0.6667	0	1	2.3333	0.6667	0	0	0.6667	0.6667	KFK33814.1(hypothetical protein AALP_AA5G063400 [Arabis alpina])	GO:0000943(cellular_component:retrotransposon nucleocapsid); GO:0015074(biological_process:DNA integration); GO:0008270(molecular_function:zinc ion binding); GO:0003676(molecular_function:nucleic acid binding)				ENOG410ZK3M(S:Function unknown); COG2801(L:Replication, recombination and repair)	ENOG410ZK3M(-); COG2801(Retrotransposon protein)	PF07727.14(RVT_2:Reverse transcriptase (RNA-dependent DNA polymerase))	sp|Q9ZT94|POLR2_ARATH(Retrovirus-related Pol polyprotein from transposon RE2 OS=Arabidopsis thaliana OX=3702 GN=RE2 PE=4 SV=1)
MSTRG.16496			235	0	0	0	0	0	2	0	0	0	1	0	0	0	1	2	1	0	0	0	0	0	0	0	0	1	0	0	0	1	0	0	1	0.3333	0.3333	0	0
MSTRG.16498			254	1	0	5	0	0	1	2	2	0	0	0	0	2	1	0	1	0	1	2	3	0	4	0	0	2	3	0	0.3333	0.3333	0.6667	2.3333	1	1.3333	0.6667	0.6667	2.6667
MSTRG.16502			816	1	2	1	2	1	1	1	2	0	4	0	5	4	5	3	1	2	2	0	2	4	2	2	5	1	3	3	0.6667	2.3333	3	0.6667	4	2.6667	2.3333	1.6667	2.3333	XP_011009833.1(PREDICTED: LOW QUALITY PROTEIN: uncharacterized protein LOC105114840 [Populus euphratica])	GO:0007076(biological_process:mitotic chromosome condensation)	K11491	NCAPD3		ENOG410XSGK(S:Function unknown)	ENOG410XSGK(Non-SMC condensin II complex, subunit D3)
MSTRG.16503			312	1	3	4	3	2	0	2	1	2	2	3	0	1	1	4	2	2	2	0	9	2	2	1	4	1	0	1	1.6667	1.6667	1.3333	3	2	5	1.6667	0.6667	1.3333	XP_011009833.1(PREDICTED: LOW QUALITY PROTEIN: uncharacterized protein LOC105114840 [Populus euphratica])	GO:0007076(biological_process:mitotic chromosome condensation); GO:0010032(biological_process:meiotic chromosome condensation); GO:0009556(biological_process:microsporogenesis)	K11491	NCAPD3		ENOG410XSGK(S:Function unknown)	ENOG410XSGK(Non-SMC condensin II complex, subunit D3)
MSTRG.16504			221	1	0	1	0	0	0	2	0	0	0	0	0	0	0	0	1	1	0	0	0	0	2	0	3	1	4	0	0.3333	0	0	1	0	1.3333	0.6667	0	2	TKR90476.1(hypothetical protein D5086_0000232900 [Populus alba])		K11491	NCAPD3		ENOG410XSGK(S:Function unknown)	ENOG410XSGK(Non-SMC condensin II complex, subunit D3)
MSTRG.16506			291	0	4.99	0	0	1	1	0	0	2	0	1	0	1.34	0	2.37	1.01	1	0	0	3	0	1	0	2	1	1	0	1	1.9967	0	0.3333	1.2367	2.0033	0.6667	0	0.6667	RQO95106.1(hypothetical protein POPTR_008G221250 [Populus trichocarpa])
MSTRG.16516			394	0	1	7	0	0	0	1	0	2	0	3	0	1	1	1	1	0	0	0	0	0	1	2	0	2	0	0	0.6667	0.3333	0	3.6667	1	0.3333	0.6667	0.6667	0.3333	XP_011005089.1(PREDICTED: probable isoleucine--tRNA ligase, mitochondrial isoform X1 [Populus euphratica] )	GO:0006428(biological_process:isoleucyl-tRNA aminoacylation); GO:0004822(molecular_function:isoleucine-tRNA ligase activity); GO:0000049(molecular_function:tRNA binding); GO:0005524(molecular_function:ATP binding); GO:0002161(molecular_function:aminoacyl-tRNA editing activity)	K01870	IARS, ileS	map00970(Aminoacyl-tRNA biosynthesis)	COG0060(J:Translation, ribosomal structure and biogenesis)	COG0060(amino acids such as valine, to avoid such errors it has two additional distinct tRNA(Ile)-dependent editing activities. One activity is designated as 'pretransfer' editing and involves the hydrolysis of activated Val-AMP. The other activity is designated 'posttransfer' editing and involves deacylation of mischarged Val-tRNA(Ile) (By similarity))		sp|Q8RXK8|SYIM_ARATH(Isoleucine--tRNA ligase, chloroplastic/mitochondrial OS=Arabidopsis thaliana OX=3702 GN=OVA2 PE=2 SV=1)
MSTRG.16526			275	0	0	0	0	0	0	0	0	0	0	0	0	0	0	0	0	0	0	0	0	0	0	0	0	0	0	0	0	0	0	0	0	0	0	0	0	XP_021648209.1(uncharacterized protein LOC110640953 isoform X1 [Hevea brasiliensis])					ENOG4111DBJ(S:Function unknown); ENOG4111JHC(S:Function unknown); ENOG410ZQPG(S:Function unknown)	ENOG4111DBJ(-); ENOG4111JHC(senescence-associated protein); ENOG410ZQPG(-)
MSTRG.16532			340	1169.54	1424.75	1114.85	1722.07	795.36	1359.1	898.82	3586.42	1535.79	976.65	1303.22	1651.45	1447.94	1719.22	1414.87	1080.51	1229	1126.04	1425.2	964.11	1320.08	1267.13	3363.44	707.46	1378.14	1519.8	1356.5	1166.9	1253.5	2319.98	1105.63	1527.34	917.36	1309.07	2048.38	1304.32	XP_022735763.1(uncharacterized protein LOC111289175 [Durio zibethinus])					ENOG410Y1GU(S:Function unknown)	ENOG410Y1GU(-)
MSTRG.16545			718	4418.26	3255.83	2744.29	6124.58	3018.63	2490.85	2015.31	8948.9	6366.63	2361.05	3852.24	3686.86	3655.5	5242.51	4983.67	3411.21	3384.26	3466.14	4429.8	2523.58	3471.62	3641.65	9589.78	3027.32	3469.28	4232.9	3147.77	4601.17	2702.58	6253.45	2870.61	4627.23	2987.37	3441.72	5722.45	3780.23	RCW19058.1(hypothetical protein GLYMA_13G017100 [Glycine max])
MSTRG.16548			1094	6360.57	6974.99	8321.08	12458.4	5569.2	8768.03	6706.98	25400.3	12207.8	5461.05	9989.69	12357.3	7596.73	8628.75	7986.17	7006.28	7362.15	6992.13	10010	5236.35	7479.21	8181.9	25775.5	3790.09	7276.07	9313.17	9450.68	8045.86	7068.02	16738.7	8339.25	8070.55	5344.24	7372.48	15078.7	8162.4	PPD75269.1(hypothetical protein GOBAR_DD27809 [Gossypium barbadense])					ENOG410Y1GU(S:Function unknown)	ENOG410Y1GU(-)
MSTRG.16549			1094	13650.5	10618.6	10669.3	20175	10088.7	9690.78	7715.43	30032	20144.2	8776.34	14930.5	12688.1	11557.8	16002.4	17664.9	13339.2	11800.7	12779.5	15330.9	8522.45	11554.5	11751.1	32868	9802.32	12233.1	13548.7	11918.4	14627.8	9695.24	20965	11105.1	15075	10554.7	11862.7	20039.1	12693.1	PPD75269.1(hypothetical protein GOBAR_DD27809 [Gossypium barbadense])					ENOG410Y1GU(S:Function unknown)	ENOG410Y1GU(-)
MSTRG.1655			318	1.01	1	3.91	6.43	0	2	7.05	7	3.99	7.09	6	3	2	1	4.71	4.01	3.37	6.6	2.99	3	2.99	7.6	8.74	5.6	0	7	5.42	1.6667	3.3633	5.4767	5.6533	2.57	4.2033	2.12	5.7167	7.0667	TKR98360.1(hypothetical protein D5086_0000204950 [Populus alba])	GO:0005524(molecular_function:ATP binding); GO:0004672(molecular_function:protein kinase activity)	K08857	NEK1_4_5		ENOG410Y7JF(S:Function unknown)	ENOG410Y7JF(-)	PF00069.25(Pkinase:Protein kinase domain); PF07714.17(Pkinase_Tyr:Protein tyrosine kinase)	sp|Q9LT35|NEK6_ARATH(Serine/threonine-protein kinase Nek6 OS=Arabidopsis thaliana OX=3702 GN=NEK6 PE=3 SV=1)
MSTRG.16551			550	439.56	290.45	201.92	510.44	451.45	113.38	197.78	809.23	559.31	140.33	373.22	207.59	338.09	684.82	529.55	251.66	242.6	285.91	179.75	152.95	263.31	343.77	209.06	95.54	302.19	355.55	102.35	483.44	181.387	509.087	257.64	517.487	166.717	269.367	163.72	328.41	XP_011013113.1(PREDICTED: LOW QUALITY PROTEIN: uncharacterized protein LOC105117228 [Populus euphratica])					ENOG4111JHC(S:Function unknown)	ENOG4111JHC(senescence-associated protein)
MSTRG.16552			1578	75.1	0	25.49	19.79	11.64	145.66	0	88.74	20.51	9.91	11.21	73.85	63.45	40.75	30.87	14.25	12.44	56.19	0	54.54	0	0	64.24	26.79	27.59	0	32.94	35.75	51.8567	60.7933	12.2333	45.0233	31.86	13.3433	32.3933	18.73	THG08421.1(hypothetical protein TEA_015079 [Camellia sinensis var. sinensis])					ENOG410Y1GU(S:Function unknown)	ENOG410Y1GU(-)
MSTRG.16553			1578	0	0	12.34	0	0	0	2.68	0	0	0	0	0	0	0	0	0	0	0	0	0	0	0	0	0	0	0	0	0	0	0	5.0067	0	0	0	0	0	THG08421.1(hypothetical protein TEA_015079 [Camellia sinensis var. sinensis])					ENOG410Y1GU(S:Function unknown)	ENOG410Y1GU(-)
MSTRG.16555			619	0	0	0	0	0	0	0	0	0	0	0	0	0	0	0	0	0	0	0	0	0	0	0	0	0	0	0	0	0	0	0	0	0	0	0	0	RDY08055.1(hypothetical protein CR513_07769, partial [Mucuna pruriens])
MSTRG.16557			891	4983.99	4492.12	3980.74	8203.35	3814.91	3969.32	3722.22	14187.8	8856.84	3480.82	6287.06	6586.95	4065.32	5803.9	5896.14	5561.53	4481.61	4975.3	7465.74	3524.57	4668.45	3942.58	14310.7	3969.4	4763.42	5253.51	5755.52	5885.25	3980.75	9659.37	4663.34	5255.12	4351.83	4637.83	9177.31	4723.8	RCW19058.1(hypothetical protein GLYMA_13G017100 [Glycine max])					ENOG410Y1GU(S:Function unknown)	ENOG410Y1GU(-)
MSTRG.16558			891	0	0	0	0	0	0	0	0	0	0	0	0	0	0	0	0	0	0	0	0	0	0	0	0	0	0	0	0	0	0	0	0	0	0	0	0	RCW19058.1(hypothetical protein GLYMA_13G017100 [Glycine max])					ENOG410Y1GU(S:Function unknown)	ENOG410Y1GU(-)
MSTRG.1656			248	0	0	0	0	0.31	0	0	0	0	0.12	0	0	0	0	0	1.14	0	0	0	0	0	0	0	0	0	0	0	0.1033	0.04	0	0	0	0.38	0	0	0	ABG37655.1(integrase [Populus trichocarpa])	GO:0015074(biological_process:DNA integration); GO:0003676(molecular_function:nucleic acid binding)
MSTRG.16560			448	1.99	0	0	0	4.86	0	1.59	1.28	0	0	1.95	2.73	0	0	3.67	0	0	0	0	0	0	2.05	0	5.69	0	0	0	2.2833	0	1.3367	1.18	1.2233	1.8967	0	0	0.6833	KRH17766.1(hypothetical protein GLYMA_13G013900 [Glycine max] )					ENOG410ZV8G(S:Function unknown); ENOG4111JHC(S:Function unknown)	ENOG410ZV8G(-); ENOG4111JHC(senescence-associated protein)
MSTRG.16566			258	0	0	0	2.87	0	0	0	5.02	1	1	0	4.98	1.82	3	0	0	0	0	3.36	2.38	1	2	2.26	1	1	1	3	0.3333	0.3333	4.29	0	1.6067	1.1267	0.6667	2.8733	1	AAD13304.1(polyprotein [Solanum lycopersicum])	GO:0015074(biological_process:DNA integration); GO:0005634(cellular_component:nucleus); GO:0004190(molecular_function:aspartic-type endopeptidase activity); GO:0003676(molecular_function:nucleic acid binding)				COG2801(L:Replication, recombination and repair)	COG2801(Retrotransposon protein)
MSTRG.16567			754	0	0	0	0	0	0	0	0	0	0	0	0	0	0	0	0	0	0	0	0	0	0	0	0	0	0	0	0	0	0	0	0	0	0	0	0	PHT29099.1(hypothetical protein CQW23_31306 [Capsicum baccatum])					ENOG410Y1GU(S:Function unknown)	ENOG410Y1GU(-)
MSTRG.16568			754	0	3.43	0	8.75	1.58	0	0	0	7.21	0	2.39	0	2.56	0	7.97	0	6.48	7.87	5.15	7.25	0	3.62	5.29	0	1.77	0	0	2.93	1.1433	2.9167	0.7967	3.51	2.4167	2.75	3.48	3.83	PHT29099.1(hypothetical protein CQW23_31306 [Capsicum baccatum])					ENOG410Y1GU(S:Function unknown)	ENOG410Y1GU(-)
MSTRG.16574			871	1256.78	1098.76	1200.14	1805.03	1150.86	1604.74	1021.98	3632.47	2033.03	1052.14	1620.4	1687.1	1633.7	1519.75	1564.07	1479.29	969.28	1562.86	1342.07	1036.87	1232.51	1482.33	4131.8	919.3	1260.78	1590.81	1749.37	1480.22	1251.88	2374.87	1280.84	1572.51	1145.15	1154.19	2407.75	1545.33	PHT29099.1(hypothetical protein CQW23_31306 [Capsicum baccatum])					ENOG410Y1GU(S:Function unknown); ENOG4111DBJ(S:Function unknown)	ENOG410Y1GU(-); ENOG4111DBJ(-)
MSTRG.16581			1254	4273.51	3759.34	4028.36	7751.48	3565.41	5086.06	2890.22	14856.8	7152.43	3771.97	4812.77	7550.21	5514.84	7742.46	7298.29	3958.87	4262.42	3336.36	6700.6	3307.15	4934.33	3684.43	18802.7	3026.11	4715.11	4839.96	7230.07	4997.12	4205.79	10052.8	3910.45	6851.86	3430.71	4637.29	10911.1	3953.58	TKS01559.1(hypothetical protein D5086_0000171980 [Populus alba] )					ENOG4111JHC(S:Function unknown)	ENOG4111JHC(senescence-associated protein)		sp|Q6CQE5|TAR1_KLULA(Protein TAR1 OS=Kluyveromyces lactis (strain ATCC 8585 / CBS 2359 / DSM 70799 / NBRC 1267 / NRRL Y-1140 / WM37) OX=284590 GN=TAR1-A PE=4 SV=2)
MSTRG.16585			270	0	9.93	1.07	4.47	2.53	7.6	0	3.32	2.15	5.37	0	3.26	1.08	9.78	1.06	3.25	3.15	3.21	2.06	7.61	2.14	6.24	1.07	9.79	3.28	0	0	1.56	7.6333	3.6833	0.3567	3.9733	6.8833	2.8567	1.0433	3.15	RZB41102.1(hypothetical protein D0Y65_055488 [Glycine soja])
MSTRG.16586			256	0	7	0	0	0	11	0	0	1	2	0	0	3	0	3	0	9	0	0	0	5	0	0	0	2	0	1	0.3333	6.6667	0	0	2	0	5.3333	0.3333	0
MSTRG.16587			454	11	28	0	4	3	29	0	1	2	45	2	5	27	21	49	18	72	0	5	5	52	0	5	1	48	0	7	5.3333	34	3.3333	0.6667	32.3333	8	57.3333	5.6667	0	PSS05945.1(Integrase [Actinidia chinensis var. chinensis])	GO:0003964(molecular_function:RNA-directed DNA polymerase activity); GO:0015074(biological_process:DNA integration); GO:0008270(molecular_function:zinc ion binding); GO:0003676(molecular_function:nucleic acid binding)						PF00078.27(RVT_1:Reverse transcriptase (RNA-dependent DNA polymerase))	sp|Q99315|YG31B_YEAST(Transposon Ty3-G Gag-Pol polyprotein OS=Saccharomyces cerevisiae (strain ATCC 204508 / S288c) OX=559292 GN=TY3B-G PE=1 SV=3)
MSTRG.16589			510	128.76	81.94	55.16	23.67	74.3	111.51	38.78	26.67	54.99	88.41	36.8	28.07	82.25	113.87	82.38	105.35	76.15	53.93	45.5	54.81	87.59	52.16	27.07	95.53	76.81	34.58	26.03	86.0167	93.9533	26.1367	43.58	92.8333	85.23	80.1833	32.8667	46.89	YP_009054181.1(NADH-plastoquinone oxidoreductase chain 5 (chloroplast) [Populus balsamifera] )	GO:0009535(cellular_component:chloroplast thylakoid membrane); GO:0008137(molecular_function:NADH dehydrogenase (ubiquinone) activity); GO:0016021(cellular_component:integral component of membrane); GO:0048038(molecular_function:quinone binding); GO:0042773(biological_process:ATP synthesis coupled electron transport)	K05577	ndhF	map00190(Oxidative phosphorylation)	COG1009(C:Energy production and conversion)	COG1009(subunit l)	PF01010.19(Proton_antipo_C:NADH-dehyrogenase subunit F, TMs, (complex I) C-terminus)	sp|A4GYW4|NU5C_POPTR(NAD(P)H-quinone oxidoreductase subunit 5, chloroplastic OS=Populus trichocarpa OX=3694 GN=ndhF PE=3 SV=1)
MSTRG.16590			238	0	0	0	2	1	0	0	1	0	2	0	1	0	1	0	1	0	0	0	0	0	1	0	4	0	1	1	0.3333	0.6667	1.3333	0	0.3333	1.6667	0	0.3333	0.6667	RVW18297.1(Transposon Ty3-G Gag-Pol polyprotein [Vitis vinifera])	GO:0015074(biological_process:DNA integration); GO:0008270(molecular_function:zinc ion binding); GO:0003676(molecular_function:nucleic acid binding)						PF17919.1(RT_RNaseH_2:RNase H-like domain found in reverse transcriptase); PF17917.1(RT_RNaseH:RNase H-like domain found in reverse transcriptase)	sp|P04323|POL3_DROME(Retrovirus-related Pol polyprotein from transposon 17.6 OS=Drosophila melanogaster OX=7227 GN=pol PE=4 SV=1)
MSTRG.16591			232	0	0	0	1	0	1	0	3	1	0	1	3	0	0	3	0	0	5	2	2	0	0	3	2	2	1	2	0.3333	0.3333	2.3333	0.3333	1	1.3333	0.6667	2.3333	2	ABG37664.1(unknown [Populus trichocarpa])	GO:0043565(molecular_function:sequence-specific DNA binding); GO:0016788(molecular_function:hydrolase activity, acting on ester bonds); GO:0006355(biological_process:regulation of transcription, DNA-templated); GO:0007165(biological_process:signal transduction); GO:0003677(molecular_function:DNA binding); GO:0008270(molecular_function:zinc ion binding)
MSTRG.16599			229	0	0	0	1	0	1	0	0	0	0	0	0	0	0	0	0	0	0	0	0	0	0	1	3.06	0	0	0	0	0.3333	0.3333	0	0	1.02	0	0.3333	0	PNS22164.1(hypothetical protein POPTR_T166900 [Populus trichocarpa])	GO:0003678(molecular_function:DNA helicase activity); GO:0006310(biological_process:DNA recombination); GO:0000723(biological_process:telomere maintenance); GO:0005524(molecular_function:ATP binding); GO:0006281(biological_process:DNA repair)	K07466	RFA1, RPA1, rpa	map03430(Mismatch repair); map03440(Homologous recombination); map03420(Nucleotide excision repair); map03030(DNA replication)	ENOG41113RA(S:Function unknown); ENOG410Y4KS(S:Function unknown); ENOG4111CXX(S:Function unknown); COG0507(L:Replication, recombination and repair)	ENOG41113RA(-); ENOG410Y4KS(helicase-like protein); ENOG4111CXX(-); COG0507(exodeoxyribonuclease v alpha)
MSTRG.16629			267	0	0	0	4	1	1	3	10	0	0	0	8	1	0	0	0	0	0	8	0	0	1	8	0	0	2	6	0.3333	0.3333	7.3333	1	0.3333	0	0	7.3333	1
MSTRG.16630			421	0	0	2	2	0	0	0	3	0	0	0	3	1	0	0	0	2	0	3	0	0	0	11	0	0	1	3	0	0	2.6667	0.6667	0.3333	0	0.6667	5.6667	0.3333
MSTRG.16693			245	0	0	1	9	1	0	2	6	2	0	0	15	0	1	0	0	0	0	8	1	0	2	9	0	0	0	9	1	0	10	1	0.3333	0.3333	0	8.6667	0.6667
MSTRG.1670			479	6	5	4	0	2	3	3	3	8	7	7	3	7	2	2	7	6	7	2	4	7	4	5	6	9	2	5	5.3333	5	2	4.6667	3.6667	5.6667	7.3333	4	4.3333	PNT55710.1(hypothetical protein POPTR_001G207300, partial [Populus trichocarpa] )	GO:0000781(cellular_component:chromosome, telomeric region); GO:0005634(cellular_component:nucleus); GO:0046872(molecular_function:metal ion binding); GO:0003721(molecular_function:telomerase RNA reverse transcriptase activity); GO:0003677(molecular_function:DNA binding)	K11126	TERT, EST2	map05225(Hepatocellular carcinoma); map05165(Human papillomavirus infection); map05226(Gastric cancer)
MSTRG.16709			576	24.3	26.41	41.72	40.68	16.97	18.65	44.33	37.8	12.84	23.03	36.69	34.03	24.49	34.86	16.23	19.33	26.93	37.82	55.73	29.95	25.8	45.25	44.42	36.08	20.81	37.48	28.37	18.0367	22.6967	37.5033	40.9133	25.1933	28.4533	24.5133	42.84	40.1833	RQO95426.1(hypothetical protein POPTR_009G018100 [Populus trichocarpa] )	GO:0003723(molecular_function:RNA binding)	K18757	LARP1		COG5193(S:Function unknown)	COG5193(expressed protein)
MSTRG.16718			279	0	0	0	0	1	1	0	0	1	0	0	0	0	0	0	1	0	2	0	0	0	0	0	2	2	0	1	0.6667	0.3333	0	0	0	1	0.6667	0.3333	0.6667
MSTRG.16779			248	8	11	2	7	8	9	2	5	7	16	9	5	7	6	10	13	10	5	3	4	32	7	1	8	17	3	1	7.6667	12	5.6667	4.3333	7.6667	8.3333	19.6667	1.6667	5	XP_024464736.1(serine/threonine-protein kinase GRIK2 isoform X1 [Populus trichocarpa])	GO:0005737(cellular_component:cytoplasm); GO:0004674(molecular_function:protein serine/threonine kinase activity); GO:0035556(biological_process:intracellular signal transduction); GO:0005524(molecular_function:ATP binding)	K07359	CAMKK2		ENOG410YHHF(T:Signal transduction mechanisms)	ENOG410YHHF(Calcium calmodulin-dependent protein kinase kinase)
MSTRG.16793			540	26	36	12	33	25	51	22	18	24	46	15	19	51	28	61	30	39	23	24	25	23	16	34	43	48	18	29	25	44.3333	23.3333	16.3333	46.6667	32.6667	36.6667	29	19	XP_011000290.1(PREDICTED: polyadenylate-binding protein 3 [Populus euphratica])	GO:0003723(molecular_function:RNA binding)	K13195	CIRBP		COG0724(S:Function unknown)	COG0724(Rna-binding protein)
MSTRG.16797			448	3	4	2	5	1	5.99	4	7	1	1	5	8	5.05	3	2	3	4	2	6	7	3	3	7	3	5	3	5	1.6667	3.6633	6.6667	3.6667	3.35	4.3333	4	6	2.6667	TKS09288.1(hypothetical protein D5086_0000094150 [Populus alba])
MSTRG.16862			244	2	1	0	3	0	0	0	2	1	1	4	2	3	1	0	4	2	2	1	0	1	4	5	1	3	0	0	1	0.6667	2.3333	1.3333	1.3333	1.6667	2	2	2	RQO95523.1(hypothetical protein POPTR_009G037750 [Populus trichocarpa])
MSTRG.16875			246	0	1	0	0	0	6	0	0	2	0	0	0	2	0	3	0	2	0	1	0	2	4	0	1	3	0	1	0.6667	2.3333	0	0	1.6667	0.3333	2.3333	0.6667	1.3333
MSTRG.16893			688	14	16	12	3	7	17	8	11	17	12	10	7	23	18	13	13	18	15	14	14	12	19	13	19	24	10	21	12.6667	15	7	10	18	15.3333	18	16	14.6667	RQO95543.1(hypothetical protein POPTR_009G042001 [Populus trichocarpa])	GO:0016021(cellular_component:integral component of membrane); GO:0055085(biological_process:transmembrane transport)	K08193	SLC17A		ENOG410XPWC(S:Function unknown)	ENOG410XPWC(RNA binding motif protein)		sp|Q66GI9|ANTR4_ARATH(Probable anion transporter 4, chloroplastic OS=Arabidopsis thaliana OX=3702 GN=ANTR4 PE=2 SV=1)
MSTRG.16894			859	86	56	60	57	46	45.74	66	43	79	78	72	56	85	105	107	53	78	96	79	57	79	85	72	88	85	62	29	70.3333	59.9133	52	66	99	66	80.6667	60	81	TKS16273.1(hypothetical protein D5086_0000025660 [Populus alba])	GO:0016021(cellular_component:integral component of membrane); GO:0055085(biological_process:transmembrane transport)				ENOG410XPWC(G:Carbohydrate transport and metabolism)	ENOG410XPWC(solute carrier family 17)		sp|Q66GI9|ANTR4_ARATH(Probable anion transporter 4, chloroplastic OS=Arabidopsis thaliana OX=3702 GN=ANTR4 PE=2 SV=1)
MSTRG.16930			212	0	0	0	0	0	0	0	0	0	0	0	0	0	0	0	0	0	0	1	0	0	0	0	0	0	0	1	0	0	0	0	0	0	0	0.6667	0
MSTRG.17044			887	30	27	9	14.89	24	24	20	37	5.65	10.57	10	31	38	30.56	29	37	31	16	24	36	35	12	25	19.01	35	13	14	19.8833	20.5233	27.63	13	32.52	30.67	33.6667	21	13.6667	RQO95618.1(hypothetical protein POPTR_009G060750 [Populus trichocarpa])		K13121	FRA10AC1		ENOG410YN91(Q:Secondary metabolites biosynthesis, transport and catabolism)	ENOG410YN91(dioxygenase)
MSTRG.17045			887	0	0	0	13.11	0	0	0	0	26.35	9.43	0	0	0	3.44	0	0	0	0	0	0	0	0	0	12.99	0	0	0	8.7833	3.1433	4.37	0	1.1467	4.33	0	0	0	RQO95618.1(hypothetical protein POPTR_009G060750 [Populus trichocarpa])		K13121	FRA10AC1		ENOG410YN91(S:Function unknown)	ENOG410YN91(Fragile site, folic acid type, rare, fra(10)(Q23.3) or fra(10)(Q24.2) candidate 1)
MSTRG.17046			576	12	14	3	10	6	12	3	10	10	4	5	11	19	16	10	11	7	3	12	11	8	6	13	8	13	2	10	9.3333	10	10.3333	3.6667	15	10	9.3333	11.6667	3.6667	PNT19887.1(hypothetical protein POPTR_009G060700, partial [Populus trichocarpa])		K13121	FRA10AC1		ENOG410YN91(S:Function unknown)	ENOG410YN91(Fragile site, folic acid type, rare, fra(10)(Q23.3) or fra(10)(Q24.2) candidate 1)
MSTRG.17061			1175	5.29	26.37	20.58	4527.23	8	8.47	31.2	1947.61	7.6	1	29.1	18148.8	3	2.01	1	16	7.55	8.72	1849.65	3.05	17.26	10.98	2109.84	21.42	2.66	136.89	2310.86	6.9633	11.9467	8207.88	26.96	2.0033	13.49	9.1567	2090.12	52.1967	XP_006379103.2(probable mannitol dehydrogenase isoform X1 [Populus trichocarpa] )	GO:0045551(molecular_function:cinnamyl-alcohol dehydrogenase activity); GO:0009809(biological_process:lignin biosynthetic process); GO:0008270(molecular_function:zinc ion binding); GO:0016616(molecular_function:oxidoreductase activity, acting on the CH-OH group of donors, NAD or NADP as acceptor); GO:0016491(molecular_function:oxidoreductase activity)	K00083	E1.1.1.195	map00940(Phenylpropanoid biosynthesis)	COG1064(C:Energy production and conversion)	COG1064(alcohol dehydrogenase)	PF08240.12(ADH_N:Alcohol dehydrogenase GroES-like domain); PF00107.26(ADH_zinc_N:Zinc-binding dehydrogenase); PF02826.19(2-Hacid_dh_C:D-isomer specific 2-hydroxyacid dehydrogenase, NAD binding domain); PF01262.21(AlaDh_PNT_C:Alanine dehydrogenase/PNT, C-terminal domain)	sp|Q9ZRF1|MTDH_FRAAN(Probable mannitol dehydrogenase OS=Fragaria ananassa OX=3747 GN=CAD PE=2 SV=1)
MSTRG.17082			294	0	0.46	0	0	1.26	1.37	0	0	0	0	0	0	1.65	0	0	0	0	0	0	0	0	0	0	0	0	0	0	0.42	0.61	0	0	0.55	0	0	0	0	PNT19958.1(hypothetical protein POPTR_009G065100 [Populus trichocarpa])	GO:0004497(molecular_function:monooxygenase activity); GO:0016020(cellular_component:membrane); GO:0020037(molecular_function:heme binding); GO:0016709(molecular_function:oxidoreductase activity, acting on paired donors, with incorporation or reduction of molecular oxygen, NAD(P)H as one donor, and incorporation of one atom of oxygen); GO:0016021(cellular_component:integral component of membrane)…				COG2124(Q:Secondary metabolites biosynthesis, transport and catabolism)	COG2124(Cytochrome p450)	PF00067.22(p450:Cytochrome P450)	sp|Q0WQ07|C7051_ARATH(Cytochrome P450 705A1 OS=Arabidopsis thaliana OX=3702 GN=CYP705A1 PE=2 SV=1)
MSTRG.17102			1663	736.5	553.49	3656.39	1917.91	632.64	610.22	4105.23	2031.23	885.39	669.73	3134.14	2235.52	589.53	688.87	520.2	997.98	793.53	6584.66	2347.52	687.66	743.09	7879.16	1933.63	1058.98	587.65	5374.84	1933.1	751.51	611.147	2061.55	3631.92	599.533	914.873	708.09	2071.42	6612.89	XP_011036386.1(PREDICTED: tubulin beta-5 chain [Populus euphratica])	GO:0005737(cellular_component:cytoplasm); GO:0007017(biological_process:microtubule-based process); GO:0000278(biological_process:mitotic cell cycle); GO:0003924(molecular_function:GTPase activity); GO:0005200(molecular_function:structural constituent of cytoskeleton); GO:0000226(biological_process:microtubule cytoskeleton organization); GO:0005874(cellular_component:microtubule); GO:0005525(mole…	K07375	TUBB	map04145(Phagosome)	COG5023(Z:Cytoskeleton)	COG5023(protein polymerization)	PF00091.25(Tubulin:Tubulin/FtsZ family, GTPase domain); PF03953.17(Tubulin_C:Tubulin C-terminal domain); PF13809.6(Tubulin_2:Tubulin like)	sp|Q43594|TBB1_ORYSJ(Tubulin beta-1 chain OS=Oryza sativa subsp. japonica OX=39947 GN=TUBB1 PE=2 SV=2)
MSTRG.17160			374	10	7	3	9	3	13	15	8	14	2	9	14.03	1	9	6	12	3	14	5	7	8	9	9	11	6.06	10	10	9	7.3333	10.3433	9	5.3333	10	5.6867	8	11	TKS01784.1(hypothetical protein D5086_0000168910 [Populus alba])
MSTRG.17166			440	6	4	0	0	3	13	0	0	6	7	2	1	9	9	7	7	13	1	0	1	10	0	0	2	2	2	0	5	8	0.3333	0.6667	8.3333	3.3333	8.3333	0	1
MSTRG.17167			1188	8	13	1	0	13	14	0	0	18	24	0	0	10	9	40	26	23	0	0	15	34	1	0	11	33	1	0	13	17	0	0.3333	19.6667	17.3333	30	0	0.6667	PNT20124.1(hypothetical protein POPTR_009G074600 [Populus trichocarpa])
MSTRG.17181			215	0	0	0	1	0	0	0	7	0	0	0	6	0	0	0	0	0	1	4	0	0	0	6	0	0	0	9	0	0	4.6667	0	0	0	0	6.3333	0.3333
MSTRG.17195			249	1	2	0	0	0	1	0	0	0	1	0	0	1	1	3	1	0	0	0	2	0	0	0	1	0	0	0	0.3333	1.3333	0	0	1.6667	1.3333	0	0	0	XP_024464838.1(probable protein phosphatase 2C 26 [Populus trichocarpa])
MSTRG.17234			2139	349	295	240	170	317	391	233	182	356	340	240	196	517	513	536	466	481	242	219	317	377	256	285	379	516	231	194	340.667	342	182.667	237.667	522	387.333	458	232.667	243	XP_002313941.2(uncharacterized protein LOC7478766 [Populus trichocarpa] )	GO:0008270(molecular_function:zinc ion binding)				ENOG41114NJ(S:Function unknown)	ENOG41114NJ(Pfam:MuDR)	PF03108.15(DBD_Tnp_Mut:MuDR family transposase); PF10551.9(MULE:MULE transposase domain); PF04434.17(SWIM:SWIM zinc finger); PF00872.18(Transposase_mut:Transposase, Mutator family)
MSTRG.1733			257	0	0	0	0	0	0	0	0	0	0	0	0	1.5	1.07	0	0	0	0	0	0	0	0	0	0	0	0	0	0	0	0	0	0.8567	0	0	0	0
MSTRG.1734			279	0	0	0	0	0	0	0	0	0	0	0	0	0	1	0	0	0	1	0	0	0	2	0	0	0	2	0	0	0	0	0	0.3333	0	0	0	1.6667
MSTRG.17411			2288	351	257	299	370	243	303	288	337.11	394.14	278	307.05	355	250	268	270	331.04	340	291.81	303	248	276	297	315.05	319	244.03	265.98	256	329.38	279.333	354.037	298.017	262.667	299.347	286.677	291.35	284.93	XP_002313838.1(protein ANTAGONIST OF LIKE HETEROCHROMATIN PROTEIN 1 [Populus trichocarpa])					ENOG411206Y(S:Function unknown)	ENOG411206Y(transposon protein)	PF13359.6(DDE_Tnp_4:DDE superfamily endonuclease); PF04827.14(Plant_tran:Plant transposon protein)	sp|Q94K49|ALP1_ARATH(Protein ANTAGONIST OF LIKE HETEROCHROMATIN PROTEIN 1 OS=Arabidopsis thaliana OX=3702 GN=ALP1 PE=1 SV=1)
MSTRG.1742			212	0	0	0	0	0	0	0	0	0	0	0	0	0	1	1	0	0	0	0	0	1	0	0	0	0	0	0	0	0	0	0	0.6667	0	0.3333	0	0	ABG37638.1(transposase [Populus trichocarpa])
MSTRG.17432			1337	505	230	218	142	250	90	493	311	437	239	353	269	273	183	194	107	172	457	300	124	108	584	367	161	137	741	268	397.333	186.333	240.667	354.667	216.667	130.667	139	311.667	594	XP_024464363.1(protein DMR6-LIKE OXYGENASE 2 isoform X1 [Populus trichocarpa] )	GO:0046872(molecular_function:metal ion binding); GO:0016491(molecular_function:oxidoreductase activity)				COG3491(S:Function unknown)	COG3491(2OGFe(II) oxygenase)	PF14226.6(DIOX_N:non-haem dioxygenase in morphine synthesis N-terminal); PF03171.20(2OG-FeII_Oxy:2OG-Fe(II) oxygenase superfamily)	sp|Q9ZSA7|DLO2_ARATH(Protein DMR6-LIKE OXYGENASE 2 OS=Arabidopsis thaliana OX=3702 GN=DLO2 PE=2 SV=1)
MSTRG.1744			287	0	0	0	0	0	1.98	0	0	0	1	0	0	0	2.91	0	0	0	0	0	0.56	2.92	0	0	0	0	0	0	0	0.9933	0	0	0.97	0.1867	0.9733	0	0	RVW62132.1(Retrovirus-related Pol polyprotein from transposon TNT 1-94 [Vitis vinifera])	GO:0000943(cellular_component:retrotransposon nucleocapsid); GO:0015074(biological_process:DNA integration); GO:0008270(molecular_function:zinc ion binding); GO:0003676(molecular_function:nucleic acid binding)	K01209	abfA	map00520(Amino sugar and nucleotide sugar metabolism)	ENOG410Y4C5(S:Function unknown); COG2801(S:Function unknown); ENOG410XS4D(S:Function unknown); ENOG410ZPTD(S:Function unknown)	ENOG410Y4C5(Retrotransposon protein); COG2801(Retrotransposon protein); ENOG410XS4D(Retrotransposon protein); ENOG410ZPTD(Zinc knuckle)		sp|P10978|POLX_TOBAC(Retrovirus-related Pol polyprotein from transposon TNT 1-94 OS=Nicotiana tabacum OX=4097 PE=2 SV=1)
MSTRG.17447			263	0	0	0	0	0	0	0	0	0	0	0	0	0	0	0	0	2	0	0	0	0	0	0	0	0	0	0	0	0	0	0	0	0	0.6667	0	0	TKS11478.1(hypothetical protein D5086_0000074210 [Populus alba])	GO:0000502(cellular_component:proteasome complex); GO:0005829(cellular_component:cytosol); GO:0005634(cellular_component:nucleus); GO:0043248(biological_process:proteasome assembly)	K11876	PSMG2, PAC2		ENOG410XRHJ(O:Posttranslational modification, protein turnover, chaperones)	ENOG410XRHJ(Proteasome (Prosome, macropain) assembly chaperone 2)
MSTRG.17448			267	6	2	0	3	2	2	2	0	4	1	1	0	1	4	4	6	1	3	6	4	4	3	0	2	1	2	0	4	1.6667	1	1	3	4	2	2	2.6667	TKS05307.1(hypothetical protein D5086_0000134040 [Populus alba])
MSTRG.1745			340	1	2	4	4	1	4	2	2	1	2	0	2	3	8	2	0	2	1	3	0	8	1	4	0	5	5	1	1	2.6667	2.6667	2	4.3333	0	5	2.6667	2.3333	RVW16102.1(Retrovirus-related Pol polyprotein from transposon TNT 1-94 [Vitis vinifera])	GO:0000943(cellular_component:retrotransposon nucleocapsid); GO:0015074(biological_process:DNA integration); GO:0004491(molecular_function:methylmalonate-semialdehyde dehydrogenase (acylating) activity); GO:0008270(molecular_function:zinc ion binding); GO:0003676(molecular_function:nucleic acid binding)	K03644	lipA	map00785(Lipoic acid metabolism)	COG2801(L:Replication, recombination and repair); ENOG4111WQF(S:Function unknown); ENOG410XS4D(S:Function unknown)	COG2801(Retrotransposon protein); ENOG4111WQF(-); ENOG410XS4D(Retrotransposon protein)		sp|P10978|POLX_TOBAC(Retrovirus-related Pol polyprotein from transposon TNT 1-94 OS=Nicotiana tabacum OX=4097 PE=2 SV=1)
MSTRG.17474			1281	24.85	22.07	17.45	12.07	13.85	43.35	16.28	11.99	13.79	29.59	31.05	23.2	47.47	42.13	42.17	13.04	25.11	21.12	28	12.07	39.2	20.13	16.87	22.03	24.77	23.04	15.07	17.4967	31.67	15.7533	21.5933	43.9233	15.7133	29.6933	19.98	21.43	XP_027355550.1(dolichyl-diphosphooligosaccharide--protein glycosyltransferase 48 kDa subunit [Abrus precatorius])	GO:0016740(molecular_function:transferase activity); GO:0016021(cellular_component:integral component of membrane); GO:0018279(biological_process:protein N-linked glycosylation via asparagine); GO:0005789(cellular_component:endoplasmic reticulum membrane)	K12670	WBP1	map00510(N-Glycan biosynthesis); map04141(Protein processing in endoplasmic reticulum)	ENOG410XSF3(S:Function unknown)	ENOG410XSF3(Dolichyl-diphosphooligosaccharide--protein glycosyltransferase)		sp|Q944K2|OST48_ARATH(Dolichyl-diphosphooligosaccharide--protein glycosyltransferase 48 kDa subunit OS=Arabidopsis thaliana OX=3702 GN=OST48 PE=2 SV=1)
MSTRG.17475			448	1	2	0	1	1	1	3	0	3	2	0	0	5	4	1	0	1	1	1	2	2	1	1	3	3	1	1	1.6667	1.6667	0.3333	1	3.3333	1.6667	2	1	1	XP_024464552.1(dolichyl-diphosphooligosaccharide--protein glycosyltransferase 48 kDa subunit [Populus trichocarpa])	GO:0016021(cellular_component:integral component of membrane); GO:0016740(molecular_function:transferase activity); GO:0018279(biological_process:protein N-linked glycosylation via asparagine); GO:0005789(cellular_component:endoplasmic reticulum membrane)	K12670	WBP1	map00510(N-Glycan biosynthesis); map04141(Protein processing in endoplasmic reticulum)	ENOG410XSF3(S:Function unknown)	ENOG410XSF3(Dolichyl-diphosphooligosaccharide--protein glycosyltransferase)	PF03345.14(DDOST_48kD:Oligosaccharyltransferase 48 kDa subunit beta)	sp|Q944K2|OST48_ARATH(Dolichyl-diphosphooligosaccharide--protein glycosyltransferase 48 kDa subunit OS=Arabidopsis thaliana OX=3702 GN=OST48 PE=2 SV=1)
MSTRG.1749			274	0	0	0	0	0	1	0	0	0	0	1	0	0	0	1	0	0	0	0	0	1	0	0	0	1	2	0	0	0.3333	0	0.3333	0.3333	0	0.6667	0	0.6667
MSTRG.17512			331	0	0	0	0	1	3	0	0	0	4	0	0	3	1	4	3	2	0	0	0	2	0	0	4	9	0	0	0.3333	2.3333	0	0	2.6667	2.3333	4.3333	0	0	RQO89391.1(hypothetical protein POPTR_004G155932 [Populus trichocarpa])
MSTRG.17560			445	6.04	4.27	1.36	2.9	7.08	5.64	0	6.17	11.79	8.27	2.92	7.13	15.55	13.95	23.59	16.54	31.04	1.1	6.73	6.91	8.75	1.89	16.3	12.83	16.84	2.9	4.13	8.3033	6.06	5.4	1.4267	17.6967	12.0933	18.8767	9.0533	1.9633	PNS96559.1(hypothetical protein POPTR_017G123600, partial [Populus trichocarpa])					COG2124(Q:Secondary metabolites biosynthesis, transport and catabolism)	COG2124(Cytochrome p450)
MSTRG.17681			267	0	0	0	0	1	0	0	0	0	0	0	0	0	1	5	1	0	0	0	1	2	0	0	0	0	1	0	0.3333	0	0	0	2	0.6667	0.6667	0	0.3333
MSTRG.17687			626	7	5	0	1	1	10	0	0	5	5	0	1	7	5	7	1	6	3	0	2	4	0	0	1	6	3	0	4.3333	6.6667	0.6667	0	6.3333	1.3333	5.3333	0	2	TKS05539.1(hypothetical protein D5086_0000136360 [Populus alba])
MSTRG.17719			630	6.81	10.11	3.46	3.55	3.48	12.65	6.15	11.42	13.34	15.35	2.69	8.73	16.36	15.54	14.01	14.33	21.07	1.52	3.65	11.3	28.45	10.49	7.63	7.93	12.48	8.84	4.96	7.8767	12.7033	7.9	4.1	15.3033	11.1867	20.6667	5.4133	6.95	ABG37663.1(CCHC-type integrase [Populus trichocarpa])	GO:0000943(cellular_component:retrotransposon nucleocapsid); GO:0016021(cellular_component:integral component of membrane); GO:0015074(biological_process:DNA integration); GO:0008270(molecular_function:zinc ion binding); GO:0003676(molecular_function:nucleic acid binding); GO:0004672(molecular_function:protein kinase activity); GO:0005524(molecular_function:ATP binding)						PF17917.1(RT_RNaseH:RNase H-like domain found in reverse transcriptase); PF17919.1(RT_RNaseH_2:RNase H-like domain found in reverse transcriptase)	sp|P04323|POL3_DROME(Retrovirus-related Pol polyprotein from transposon 17.6 OS=Drosophila melanogaster OX=7227 GN=pol PE=4 SV=1)
MSTRG.17734			464	2	1	1	12	0	1	1	6	3	0	0	14	1	0	2	2	0	2	8	1	0	0	12	0	0	3	15	1.6667	0.6667	10.6667	0.6667	1	1	0	11.6667	1.6667	PNT21370.1(hypothetical protein POPTR_009G144200, partial [Populus trichocarpa])	GO:0008568(molecular_function:microtubule-severing ATPase activity); GO:0005524(molecular_function:ATP binding)	K12196	VPS4	map04144(Endocytosis); map04217(Necroptosis)	ENOG410XRHN(P:Inorganic ion transport and metabolism)	ENOG410XRHN(Monooxygenase)		sp|Q9ZNT0|VPS4_ARATH(Protein SUPPRESSOR OF K(+) TRANSPORT GROWTH DEFECT 1 OS=Arabidopsis thaliana OX=3702 GN=SKD1 PE=1 SV=1)
MSTRG.17745			1223	207	154	80	77	127	153	74	70	181	165	108	94	148	197	173	185	153	94	89	117	163	117	103	186	189	117	61	171.667	157.333	80.3333	87.3333	172.667	162.667	168.333	84.3333	109.333	TKR66142.1(hypothetical protein D5086_0000313840 [Populus alba])	GO:0000160(biological_process:phosphorelay signal transduction system)	K14490	AHP	map04075(Plant hormone signal transduction)	ENOG4111681(S:Function unknown)	ENOG4111681(-)		sp|Q6VAK3|OHP1_ORYSJ(Histidine-containing phosphotransfer protein 1 OS=Oryza sativa subsp. japonica OX=39947 GN=AHP1 PE=2 SV=1)
MSTRG.1775			1012	28	28	34.38	8	20.24	35	55	4	15	52.71	43.27	5	52	42.39	44	21	14	23.24	5	13	22	37	12	29.28	39	33	3	21.08	38.57	5.6667	44.2167	46.13	21.0933	25	6.6667	31.08	RQO85485.1(hypothetical protein POPTR_001G284401 [Populus trichocarpa])
MSTRG.1776			1891	17.12	11	25	6	11	21.05	35.62	3.01	10	13.04	20.94	3	15	29.05	29.12	13	31.04	23	6.03	7	21.07	28	8	17	27	16.01	0	12.7067	15.03	4.0033	27.1867	24.39	12.3333	26.37	4.6767	22.3367	PNT57152.1(hypothetical protein POPTR_001G284800 [Populus trichocarpa])
MSTRG.1778			359	4.03	0	0	0	0.67	0	0	0	4.7	0	0	0	0	0	0	0.72	0	0	0	0	0	0	0	1.17	0	0.75	0	3.1333	0	0	0	0	0.63	0	0	0.25	RQO85204.1(hypothetical protein POPTR_001G222100 [Populus trichocarpa])	GO:0006952(biological_process:defense response); GO:0005576(cellular_component:extracellular region)				ENOG410ZJVY(S:Function unknown)	ENOG410ZJVY(THN)	PF00314.17(Thaumatin:Thaumatin family)	sp|O80327|TLP1_PYRPY(Thaumatin-like protein 1 OS=Pyrus pyrifolia OX=3767 GN=TL1 PE=1 SV=1)
MSTRG.17786			563	1	1	6	0	0	2	3	1	0	1	5	0	0	3	0	1	0	2	0	0	0	4	0	0	0	6	0	0.3333	1.3333	0.3333	4.6667	1	0.3333	0	0	4	PNT21483.1(hypothetical protein POPTR_009G150700 [Populus trichocarpa])	GO:0008374(molecular_function:O-acyltransferase activity); GO:0016021(cellular_component:integral component of membrane); GO:0006629(biological_process:lipid metabolic process)	K00679	E2.3.1.158	map00561(Glycerolipid metabolism)	ENOG410Y9CF(S:Function unknown)	ENOG410Y9CF(Domain of unknown function (DUF3411))		sp|Q9FYC7|PDAT2_ARATH(Putative phospholipid:diacylglycerol acyltransferase 2 OS=Arabidopsis thaliana OX=3702 GN=PDAT2 PE=3 SV=1)
MSTRG.17793			202	1	3	0	0	0	0	4	0	2	2	3	5	0	0	3	4	1	1	1	4	1	1	0	2	0	1	2	1	1.6667	1.6667	2.3333	1	3.3333	0.6667	1	1
MSTRG.17801			4158	660.16	976.45	594.75	1344.62	541.68	808.82	692.56	995.25	642.35	1120.41	694.16	1549.55	953.11	963.36	1343.96	948.13	1508.44	802.56	2038.03	736.14	1033.6	864.25	1863.18	765.2	1380.21	752.41	1574.4	614.73	968.56	1296.47	660.49	1086.81	816.49	1307.42	1825.2	806.407	XP_024464755.1(indole-3-acetaldehyde oxidase isoform X1 [Populus trichocarpa] )	GO:0004031(molecular_function:aldehyde oxidase activity); GO:0102798(deleted:old GO); GO:0102797(deleted:old GO); GO:0051537(molecular_function:2 iron, 2 sulfur cluster binding); GO:0005506(molecular_function:iron ion binding); GO:0071949(molecular_function:FAD binding); GO:0009055(molecular_function:electron carrier activity)	K09842	AAO3	map00906(Carotenoid biosynthesis)	COG4630(F:Nucleotide transport and metabolism)	COG4630(xanthine dehydrogenase)	PF02738.18(Ald_Xan_dh_C2:Molybdopterin-binding domain of aldehyde dehydrogenase); PF00941.21(FAD_binding_5:FAD binding domain in molybdopterin dehydrogenase); PF01315.22(Ald_Xan_dh_C:Aldehyde oxidase and xanthine dehydrogenase, a/b hammerhead domain); PF01799.20(Fer2_2:[2Fe-2S] binding domain); PF03450.17(CO_deh_flav_C:CO dehydrogenase flavoprotein C-terminal domain); PF00111.27(Fer2:2Fe-2S iron-…	sp|Q7G9P4|ALDO3_ARATH(Abscisic-aldehyde oxidase OS=Arabidopsis thaliana OX=3702 GN=AAO3 PE=1 SV=1)
MSTRG.17849			563	2	0	5	4	2	7	1	2	6	5	3	3	9	3	7	6	2	5	0	3	14	4	0	1	2	8	6	3.3333	4	3	3	6.3333	3.3333	6	2	5.6667	RQO95972.1(hypothetical protein POPTR_009G159501 [Populus trichocarpa])
MSTRG.17871			4407	176	118	176	177	132	114	163	122	178	131	183	129	122	135	136	179	161	184	161	142	140	184	155	209	124	188	101	162	121	142.667	174	131	176.667	141.667	139	185.333	XP_024464940.1(pentatricopeptide repeat-containing protein At5g62370-like isoform X1 [Populus trichocarpa] )					ENOG410Z7Z7(S:Function unknown)	ENOG410Z7Z7(Pentatricopeptide repeat-containing protein)	PF13041.6(PPR_2:PPR repeat family); PF12854.7(PPR_1:PPR repeat); PF01535.20(PPR:PPR repeat); PF13812.6(PPR_3:Pentatricopeptide repeat domain); PF17177.4(PPR_long:Pentacotripeptide-repeat region of PRORP)	sp|Q9LVA2|PP443_ARATH(Pentatricopeptide repeat-containing protein At5g62370 OS=Arabidopsis thaliana OX=3702 GN=At5g62370 PE=2 SV=1)
MSTRG.17888			776	8	6	10	3	4	33	11	0	8	6	7	1	29	9	13	4	13	0	4	0	4	5	4	0	6	4	4	6.6667	15	1.3333	9.3333	17	1.3333	7.6667	4	3
MSTRG.17943			349	4	1	2	0	0	0	1	2	1	6	2.73	5	1	4.34	2	0	3.79	0	5	4	3	4	1	4	5	3	2	1.6667	2.3333	2.3333	1.91	2.4467	2.6667	3.93	2.6667	2.3333	XP_024444496.1(uncharacterized protein LOC112324672 [Populus trichocarpa])					ENOG4111SPB(S:Function unknown); ENOG4111XVU(S:Function unknown)	ENOG4111SPB(transposon protein); ENOG4111XVU(transposon protein)	PF05699.14(Dimer_Tnp_hAT:hAT family C-terminal dimerisation region)
MSTRG.1795			950	5	3	1	11	1	2	0	6.1	5	3	0	19.11	8	5	18.02	4.06	9	1	7.54	8.34	5	1	12	6	3	3	27	3.6667	2.6667	12.07	0.3333	10.34	6.1333	5.6667	15.5133	1.6667	XP_024462990.1(uncharacterized protein LOC112328469 [Populus trichocarpa])	GO:0000943(cellular_component:retrotransposon nucleocapsid); GO:0016021(cellular_component:integral component of membrane)				COG2801(G:Carbohydrate transport and metabolism); ENOG410ZK3M(S:Function unknown)	COG2801(beta-glucosidase); ENOG410ZK3M(-)		sp|Q9ZT94|POLR2_ARATH(Retrovirus-related Pol polyprotein from transposon RE2 OS=Arabidopsis thaliana OX=3702 GN=RE2 PE=4 SV=1)
MSTRG.17950			275	0	0	0	2	2	0	1	0	5	0	1	1	1	4	3	1	3	1	1	2	1	1	1	2	1	1	3	2.3333	0	1	0.6667	2.6667	1.6667	1.6667	1.6667	1	PSS08065.1(Integrase [Actinidia chinensis var. chinensis])	GO:0016779(molecular_function:nucleotidyltransferase activity); GO:0005634(cellular_component:nucleus); GO:0004523(molecular_function:RNA-DNA hybrid ribonuclease activity); GO:0015074(biological_process:DNA integration); GO:0008270(molecular_function:zinc ion binding); GO:0003676(molecular_function:nucleic acid binding)
MSTRG.17996			254	0	0	1	0	0	0	0	0	0	0	0	0	1	1	0	1	2	0	1	0	0	3	0	1	3	0	1	0	0	0	0.3333	0.6667	0.6667	1.6667	0.6667	1	RQO96281.1(hypothetical protein POPTR_010G052600 [Populus trichocarpa])	GO:0009651(biological_process:response to salt stress); GO:0032588(cellular_component:trans-Golgi network membrane); GO:0048364(biological_process:root development); GO:0007034(biological_process:vacuolar transport); GO:0010031(biological_process:circumnutation)				ENOG410Y3U1(S:Function unknown)	ENOG410Y3U1(-)
MSTRG.18002			471	2	2	3	1	0	7	6	3	3	6	9	5	28	25	20	2	33	18	2	1	22	20	4	4	28	30	4	1.6667	5	3	6	24.3333	2.3333	27.6667	3.3333	22.6667	RQO96074.1(hypothetical protein POPTR_010G007401 [Populus trichocarpa])
MSTRG.18005			309	0	0	0	0	0	1	0	0	0	0	0	1	0	1	0	2	0	0	0	3	1	1	1	0	2	0	0	0	0.3333	0.3333	0	0.3333	1.6667	1	0.3333	0.3333
MSTRG.18006			275	3	0	0	0	0	1	0	0	1	0.96	0	0	1	0	2	0	1	0	0	0	9	1	0	0	3	0	0	1.3333	0.6533	0	0	1	0	4.3333	0	0.3333	PNT14085.1(hypothetical protein POPTR_010G009700 [Populus trichocarpa] )	GO:0016021(cellular_component:integral component of membrane)				COG4886(S:Function unknown); COG0464(S:Function unknown)	COG4886(leucine Rich Repeat); COG0464(leucine Rich Repeat)
MSTRG.18032			577	6.55	20.78	4.55	25.81	7	24.69	3.51	14.76	8.64	33.4	6.16	15.21	65.29	59.12	93.81	14.16	80.4	3.99	34.42	7.87	67.62	11.76	40.86	7.47	70.43	9.91	12.92	7.3967	26.29	18.5933	4.74	72.74	9.8333	72.8167	29.4	8.5533	TKR66554.1(hypothetical protein D5086_0000310300 [Populus alba])	GO:0003924(molecular_function:GTPase activity); GO:0005525(molecular_function:GTP binding)	K03234	EEF2		COG0138(F:Nucleotide transport and metabolism); COG0144(J:Translation, ribosomal structure and biogenesis); COG0480(J:Translation, ribosomal structure and biogenesis)	COG0138(bifunctional purine biosynthesis protein PURH); COG0144(nOP2 Sun); COG0480(Catalyzes the GTP-dependent ribosomal translocation step during translation elongation. During this step, the ribosome changes from the pre-translocational (PRE) to the post- translocational (POST) state as the newly formed A-site-bound peptidyl-tRNA and P-site-bound deacylated tRNA move to the P and E sites, respe…		sp|O23755|EF2_BETVU(Elongation factor 2 OS=Beta vulgaris OX=161934 PE=2 SV=1)
MSTRG.18056			286	2	0	0	0	1	1	1	0	3	0	4	0	1	4	3	2	1	2	4	0	2	0	2	1	1	1	0	2	0.3333	0	1.6667	2.6667	1	1.3333	2	1	XP_022861750.1(serine/threonine-protein phosphatase BSL3-like [Olea europaea var. sylvestris])	GO:0005737(cellular_component:cytoplasm); GO:0009742(biological_process:brassinosteroid mediated signaling pathway); GO:0005829(cellular_component:cytosol); GO:0004722(molecular_function:protein serine/threonine phosphatase activity); GO:0004721(molecular_function:phosphoprotein phosphatase activity); GO:0005886(cellular_component:plasma membrane); GO:0046872(molecular_function:metal ion binding)…				COG0639(S:Function unknown)	COG0639(-)		sp|Q9SJF0|BSL2_ARATH(Serine/threonine-protein phosphatase BSL2 OS=Arabidopsis thaliana OX=3702 GN=BSL2 PE=1 SV=2)
MSTRG.18061			231	0	1	0	0	0	0	0	0	0	0	1	0	0	0	0	1	0	1	0	1	1	0	0	0	0	0	0	0	0.3333	0	0.3333	0	0.6667	0.3333	0	0.3333
MSTRG.18073			203	6	4.54	2	2	2	10.51	3	11.89	4.27	9.56	3.97	11.37	12.87	9.45	5.37	5.45	10.77	3.54	5.1	10	6	10	9	5.61	6.03	5.47	3.79	4.09	8.2033	8.42	2.99	9.23	7.02	7.6	5.9633	6.3367
MSTRG.18074			301	5.63	2	1.94	7.08	0.97	8.76	1.67	5.45	3.98	3	1.13	5.96	10.69	11.19	3.09	5.89	15.04	0	10.97	6.5	2.16	4	5.56	6.9	13.57	4.73	0	3.5267	4.5867	6.1633	1.58	8.3233	6.43	10.2567	5.51	2.91	XP_024455309.1(LOW QUALITY PROTEIN: uncharacterized protein LOC112327266 [Populus trichocarpa])	GO:0015074(biological_process:DNA integration); GO:0004190(molecular_function:aspartic-type endopeptidase activity); GO:0008270(molecular_function:zinc ion binding); GO:0003676(molecular_function:nucleic acid binding)						PF08284.11(RVP_2:Retroviral aspartyl protease); PF09668.10(Asp_protease:Aspartyl protease)
MSTRG.18083			372	0	0	0	0	0	0	0	0	0	0	0	0	0	0	0	0	0	0	0	0	0	0	0	0	0	0	0	0	0	0	0	0	0	0	0	0	XP_024465788.1(cyclin-dependent kinase G-2 [Populus trichocarpa])	GO:0005524(molecular_function:ATP binding); GO:0004672(molecular_function:protein kinase activity)	K08818	CDC2L		ENOG410XQ50(S:Function unknown)	ENOG410XQ50(Whole genome shotgun sequence of line PN40024, scaffold_38.assembly12x (Fragment))	PF00069.25(Pkinase:Protein kinase domain); PF07714.17(Pkinase_Tyr:Protein tyrosine kinase)	sp|A2XUW1|CDKG2_ORYSI(Cyclin-dependent kinase G-2 OS=Oryza sativa subsp. indica OX=39946 GN=CDKG-2 PE=3 SV=1)
MSTRG.18122			871	21.01	29.99	36.03	29	13.94	41	38	32.99	19.01	34	19	36	30	29.93	35	31.95	21.98	30	31.15	26	36.04	31.96	28.01	50.91	54.01	39.01	30	17.9867	34.9967	32.6633	31.01	31.6433	36.2867	37.3433	29.72	33.6567	PNT14354.1(hypothetical protein POPTR_010G026700, partial [Populus trichocarpa] )	GO:0016021(cellular_component:integral component of membrane)				ENOG410YXN0(S:Function unknown)	ENOG410YXN0(-)
MSTRG.18125			1239	5.45	3.6	5.88	212.44	1.11	6.88	3.88	220.32	1.09	7.69	0	226.05	10.88	5.04	9.88	3.15	19.47	2.16	143.35	0	16.97	0.99	201.65	6.41	0	1.06	199.54	2.55	6.0567	219.603	3.2533	8.6	3.1867	12.1467	181.513	1.4033	KYP44533.1(Retrovirus-related Pol polyprotein from transposon TNT 1-94 [Cajanus cajan])	GO:0004356(molecular_function:glutamate-ammonia ligase activity); GO:0000943(cellular_component:retrotransposon nucleocapsid); GO:0015074(biological_process:DNA integration); GO:0008270(molecular_function:zinc ion binding); GO:0003676(molecular_function:nucleic acid binding); GO:0003964(molecular_function:RNA-directed DNA polymerase activity)				ENOG410ZXEB(S:Function unknown); ENOG410XS4D(S:Function unknown); COG2801(L:Replication, recombination and repair)	ENOG410ZXEB(Integrase core domain); ENOG410XS4D(Retrotransposon protein); COG2801(Retrotransposon protein)	PF00665.26(rve:Integrase core domain); PF13976.6(gag_pre-integrs:GAG-pre-integrase domain)	sp|P10978|POLX_TOBAC(Retrovirus-related Pol polyprotein from transposon TNT 1-94 OS=Nicotiana tabacum OX=4097 PE=2 SV=1)
MSTRG.18147			759	3	3	7	6	4	2	6	4	8	9	3	1	5	6	5	9	6	2	4	1	2	2	1	8	7	6	4	5	4.6667	3.6667	5.3333	5.3333	6	5	3	3.3333
MSTRG.18156			214	0	0	0	0	0	0	0	0	0	0	0	0	0	0	0	1	0	0	0	1	0	0	2	1	0	4	0	0	0	0	0	0	1	0	0.6667	1.3333
MSTRG.18165			472	4	3	4	4	0	2	3	4	1	3	2	5	12	10	9	1	5	10	2	7	3	5	4	7	3	6	3	1.6667	2.6667	4.3333	3	10.3333	5	3.6667	3	7
MSTRG.18166			1042	120.88	98.09	80.91	134.01	72.39	90.66	87.34	90.53	67.75	99.56	62.56	59.98	201.97	193.45	217.21	48.33	96.58	59.83	65.82	108.7	117.3	138.09	106.57	44.67	137.65	44.13	42.83	87.0067	96.1033	94.84	76.9367	204.21	67.2333	117.177	71.74	80.6833	PNS23878.1(hypothetical protein POPTR_T031200 [Populus trichocarpa])	GO:0016021(cellular_component:integral component of membrane)
MSTRG.1817			915	5.98	1	0	0	5.32	0	0	0	36.28	0	0	0	5.12	0	0	1.83	0	0	1	4.65	6.97	0	0	0	0	0	0	15.86	0.3333	0	0	1.7067	2.16	2.3233	0.3333	0	XP_024466960.1(cyanogenic beta-glucosidase isoform X1 [Populus trichocarpa] )	GO:0005975(biological_process:carbohydrate metabolic process); GO:0004553(molecular_function:hydrolase activity, hydrolyzing O-glycosyl compounds)	K01188	E3.2.1.21	map00460(Cyanoamino acid metabolism); map00500(Starch and sucrose metabolism); map00940(Phenylpropanoid biosynthesis)	COG2723(G:Carbohydrate transport and metabolism)	COG2723(beta-glucosidase)	PF00232.18(Glyco_hydro_1:Glycosyl hydrolase family 1)	sp|Q7XKV2|BGL13_ORYSJ(Beta-glucosidase 13 OS=Oryza sativa subsp. japonica OX=39947 GN=BGLU13 PE=2 SV=2)
MSTRG.18172			283	0	1	1	0	0	0	0	0	1	0	0	0	3	1	0	0	0	1	0	0	2	0	0	0	1	0	0	0.3333	0.3333	0	0.3333	1.3333	0	1	0	0.3333	PNS90486.1(hypothetical protein POPTR_019G046800, partial [Populus trichocarpa])	GO:0009536(cellular_component:plastid); GO:0005840(cellular_component:ribosome); GO:0019843(molecular_function:rRNA binding); GO:0003735(molecular_function:structural constituent of ribosome); GO:0006351(biological_process:transcription, DNA-templated); GO:0003677(molecular_function:DNA binding); GO:0003899(molecular_function:DNA-directed RNA polymerase activity); GO:0046983(molecular_function:pr…	K02948	RP-S11, MRPS11, rpsK	map03010(Ribosome)	COG0100(T:Signal transduction mechanisms)	COG0100(dual specificity phosphatase)	PF00411.19(Ribosomal_S11:Ribosomal protein S11)	sp|Q4VZK2|RR11_CUCSA(30S ribosomal protein S11, chloroplastic OS=Cucumis sativus OX=3659 GN=rps11 PE=3 SV=1)
MSTRG.18173			1568	48.77	142	71.5	120.33	73.93	166.49	70.44	154.78	91.75	153.31	53.45	109.83	100.54	127.16	126.56	63.25	79.85	50.88	60.82	67.66	98.1	87.29	164.95	73.27	102.1	80.52	67.44	71.4833	153.933	128.313	65.13	118.087	68.06	93.35	97.7367	72.8967	XP_017609674.1(PREDICTED: uncharacterized protein LOC108455646 [Gossypium arboreum])					ENOG410Y1GU(S:Function unknown)	ENOG410Y1GU(-)
MSTRG.18174			442	10	1	2	1	10	5.96	2	2	8	4	7	1	12	10	5	8	6	2	3	6	1	2	0	12	5	2	2	9.3333	3.6533	1.3333	3.6667	9	8.6667	4	1.6667	2	ABG37658.1(integrase [Populus trichocarpa])	GO:0015074(biological_process:DNA integration); GO:0016779(molecular_function:nucleotidyltransferase activity); GO:0004523(molecular_function:RNA-DNA hybrid ribonuclease activity); GO:0003676(molecular_function:nucleic acid binding)						PF17919.1(RT_RNaseH_2:RNase H-like domain found in reverse transcriptase); PF17917.1(RT_RNaseH:RNase H-like domain found in reverse transcriptase)	sp|P04323|POL3_DROME(Retrovirus-related Pol polyprotein from transposon 17.6 OS=Drosophila melanogaster OX=7227 GN=pol PE=4 SV=1)
MSTRG.18198			232	1	1	0	0	1	2	0	0	1	0	0	0	0	0	0	2	0	0	0	0	5	0	0	2	3	0	0	1	1	0	0	0	1.3333	2.6667	0	0	ABG37638.1(transposase [Populus trichocarpa])	GO:0008270(molecular_function:zinc ion binding); GO:0003676(molecular_function:nucleic acid binding)
MSTRG.18212			524	27	23	18	30	20	34	26	20	36	24	25	22	18	25	21	30	33	39	33	27	22	28	11	25	24	36	14	27.6667	27	24	23	21.3333	27.3333	26.3333	19.3333	34.3333	TKR66208.1(hypothetical protein D5086_0000312850 [Populus alba])					ENOG411065M(S:Function unknown)	ENOG411065M(Protein of unknown function (DUF2930))		sp|Q6NQK9|CCB4_ARATH(Protein COFACTOR ASSEMBLY OF COMPLEX C SUBUNIT B CCB4, chloroplastic OS=Arabidopsis thaliana OX=3702 GN=CCB4 PE=1 SV=1)
MSTRG.18219			386	205.73	128.07	145.26	174.84	127.49	200.14	162.04	165.35	181.2	199.58	162.96	191.52	145.02	204.66	152.99	195.97	196.36	203.57	231.9	156.62	153.7	175.86	264.74	276.8	214.89	136.2	124.51	171.473	175.93	177.237	156.753	167.557	209.797	188.317	207.05	171.877
MSTRG.18220			600	90.85	75.55	72.37	85.39	68.61	104.3	96.18	116.01	92.76	117.42	100.99	94.46	75.27	119.15	103.24	111.94	99.78	111.61	111.21	108.53	102.39	100.57	129.1	141.48	108.69	120.58	84.16	84.0733	99.09	98.62	89.8467	99.22	120.65	103.62	108.157	110.92
MSTRG.18248			538	162	322	2242	1870	171	228	2710	1649	188	401	1716	2661	349	461	320	145	275	2287	1876	191	620	2770	3866	218	240	2826	2585	173.667	317	2060	2222.67	376.667	184.667	378.333	2775.67	2627.67	PNT14674.1(hypothetical protein POPTR_010G043400 [Populus trichocarpa])
MSTRG.18284			257	0	0	0	0	0	0	0	0	0	0	0	0	0	0	0	0	0	0	0	0	0	0	0	0	0	0	0	0	0	0	0	0	0	0	0	0	PNT14751.1(hypothetical protein POPTR_010G047300 [Populus trichocarpa])	GO:0004519(molecular_function:endonuclease activity); GO:0006364(biological_process:rRNA processing); GO:0090730(deleted:old GO)	K16912	LAS1		ENOG411230Q(S:Function unknown)	ENOG411230Q(LAS1-like (S. cerevisiae))
MSTRG.183			243	5	2	11	2	3	2	3	3	4	6	3	5.95	3	6	7	5	5	4	2	0	6	7	2	7	4	1	5	4	3.3333	3.65	5.6667	5.3333	4	5	3	4
MSTRG.18340			824	59	82	23	36	48	77	17	62	87	102	43	61	157	117	159	119	171	47	95	120	142	56	110	96	211	24	108	64.6667	87	53	27.6667	144.333	111.667	174.667	104.333	42.3333	TKS12846.1(vinorine synthase-like, partial [Populus alba])	GO:0016747(molecular_function:transferase activity, transferring acyl groups other than amino-acyl groups)				ENOG41113FV(S:Function unknown)	ENOG41113FV(Transferase family)	PF02458.15(Transferase:Transferase family)	sp|A0A2P1GIW7|SAT_CATRO(Stemmadenine O-acetyltransferase OS=Catharanthus roseus OX=4058 GN=SAT PE=1 SV=1)
MSTRG.18349			205	4	2.95	0	3.15	0	0	1.02	3.63	0	1	1	1.88	2	2.99	0	4.99	0.99	0	1.99	2	4	2	0	1	3.32	0	2.09	1.3333	1.3167	2.8867	0.6733	1.6633	2.6633	2.77	1.36	0.6667	PNT11715.1(hypothetical protein POPTR_011G040600 [Populus trichocarpa])
MSTRG.18372			869	49	45	27	37	55	59	64	51	55	29	39	44	55	46	31	80	87	78	62	39	74	59	48	59	64	57	40	53	44.3333	44	43.3333	44	59.3333	75	50	64.6667	XP_024465263.1(uncharacterized protein LOC112328791 [Populus trichocarpa])	GO:0015074(biological_process:DNA integration); GO:0008270(molecular_function:zinc ion binding); GO:0003676(molecular_function:nucleic acid binding)						PF03732.17(Retrotrans_gag:Retrotransposon gag protein)
MSTRG.18404			351	29	16.5	25	32.52	12.99	19	19.97	20.91	44	23	25	23.83	33.29	32.61	24	27	21	42.49	30	30.97	39	26.75	32.29	39.46	27.76	34	29	28.6633	19.5	25.7533	23.3233	29.9667	32.4767	29.2533	30.43	34.4133	XP_024455896.1(zinc finger BED domain-containing protein RICESLEEPER 2 [Populus trichocarpa])					ENOG410ZT99(S:Function unknown); ENOG4111T8J(S:Function unknown)	ENOG410ZT99(Pfam:hATC); ENOG4111T8J(transposon protein)	PF05699.14(Dimer_Tnp_hAT:hAT family C-terminal dimerisation region)	sp|B9FJG3|RSLE1_ORYSJ(Zinc finger BED domain-containing protein RICESLEEPER 1 OS=Oryza sativa subsp. japonica OX=39947 GN=Os05g0239150 PE=3 SV=1)
MSTRG.18409			405	4	0	1	0	1	0	2	0	6	1	1	0	0	0	0	4	0	2	0	1	0	5	0	2	0	5	0	3.6667	0.3333	0	1.3333	0	2.3333	0	0	4	TKS12787.1(hypothetical protein D5086_0000060140, partial [Populus alba])	GO:0016021(cellular_component:integral component of membrane); GO:0051015(molecular_function:actin filament binding); GO:0003779(molecular_function:actin binding); GO:0016459(cellular_component:myosin complex); GO:0003774(molecular_function:motor activity); GO:0005524(molecular_function:ATP binding)	K10357	MYO5		COG5022(Z:Cytoskeleton)	COG5022(myosin heavy chain)	PF02736.19(Myosin_N:Myosin N-terminal SH3-like domain)	sp|F4IUG9|MYO13_ARATH(Myosin-13 OS=Arabidopsis thaliana OX=3702 GN=XI-G PE=3 SV=1)
MSTRG.18443			575	11	1	0	6	5	1	13	4	6	2	6	9	2	11	0	13	1	4	9	11	3	10	10	6	2	8	2	7.3333	1.3333	6.3333	6.3333	4.3333	10	2	7	7.3333	PNT15100.1(hypothetical protein POPTR_010G066300 [Populus trichocarpa])
MSTRG.1847			321	0	0	0	0	0	0	0	0	0	0	0	1	0	0	0	0	0	0	0	0	0	0	2	0	0	0	0	0	0	0.3333	0	0	0	0	0.6667	0	PNT56156.1(hypothetical protein POPTR_001G230400, partial [Populus trichocarpa])	GO:0046983(molecular_function:protein dimerization activity)
MSTRG.18486			266	1.06	3.64	1	3.77	0	5.6	0	2	1.97	1	1.42	2.79	5.95	1.19	2	2.87	2	0	1	1.84	3.18	0	0	5	2.99	0.7	0.79	1.01	3.4133	2.8533	0.8067	3.0467	3.2367	2.7233	0.5967	0.2333	RVW30432.1(Retrovirus-related Pol polyprotein from transposon TNT 1-94 [Vitis vinifera])	GO:0000943(cellular_component:retrotransposon nucleocapsid); GO:0016021(cellular_component:integral component of membrane); GO:0015074(biological_process:DNA integration); GO:0008270(molecular_function:zinc ion binding); GO:0003676(molecular_function:nucleic acid binding); GO:0004970(molecular_function:ionotropic glutamate receptor activity)				COG2801(L:Replication, recombination and repair); ENOG410Y4C5(L:Replication, recombination and repair); ENOG410ZJWX(S:Function unknown); ENOG410ZPTD(S:Function unknown); ENOG410XS4D(S:Function unknown)	COG2801(Retrotransposon protein); ENOG410Y4C5(Retrotransposon protein); ENOG410ZJWX(-); ENOG410ZPTD(Zinc knuckle); ENOG410XS4D(Retrotransposon protein)	PF00665.26(rve:Integrase core domain); PF13683.6(rve_3:Integrase core domain)	sp|P10978|POLX_TOBAC(Retrovirus-related Pol polyprotein from transposon TNT 1-94 OS=Nicotiana tabacum OX=4097 PE=2 SV=1)
MSTRG.18487			257	0	1	0	0	0	0	1.61	0	0	1.3	1.01	0	0	0.7	0	0	0	0	0	0	1.11	0	0	0	0	0	0	0	0.7667	0	0.8733	0.2333	0	0.37	0	0	XP_011005534.1(PREDICTED: LOW QUALITY PROTEIN: uncharacterized protein LOC105111782 [Populus euphratica])	GO:0000943(cellular_component:retrotransposon nucleocapsid); GO:0016021(cellular_component:integral component of membrane); GO:0015074(biological_process:DNA integration); GO:0008270(molecular_function:zinc ion binding); GO:0003676(molecular_function:nucleic acid binding); GO:0004970(molecular_function:ionotropic glutamate receptor activity)	K00430;K05658	E1.11.1.7;ABCB1, CD243	map00940(Phenylpropanoid biosynthesis); map02010(ABC transporters); map05226(Gastric cancer)	COG1132(L:Replication, recombination and repair); COG0515(L:Replication, recombination and repair); ENOG4111WQF(S:Function unknown); COG2801(L:Replication, recombination and repair); ENOG410XS4D(S:Function unknown)	COG1132(Retrotransposon protein); COG0515(Retrotransposon protein); ENOG4111WQF(-); COG2801(Retrotransposon protein); ENOG410XS4D(Retrotransposon protein)		sp|P10978|POLX_TOBAC(Retrovirus-related Pol polyprotein from transposon TNT 1-94 OS=Nicotiana tabacum OX=4097 PE=2 SV=1)
MSTRG.18546			766	0	0	0	16.7	0	0	0	20.52	0	0	0	20.29	0	0	0	0	0	0	16.3	0	0	0	36.87	0	0	1	12.75	0	0	19.17	0	0	0	0	21.9733	0.3333	TKS03734.1(hypothetical protein D5086_0000150370 [Populus alba])	GO:0006633(biological_process:fatty acid biosynthetic process); GO:0016021(cellular_component:integral component of membrane); GO:0016020(cellular_component:membrane); GO:0016747(molecular_function:transferase activity, transferring acyl groups other than amino-acyl groups)	K15397	KCS	map00062(Fatty acid elongation)	COG3424(Q:Secondary metabolites biosynthesis, transport and catabolism); ENOG410Y5VH(I:Lipid transport and metabolism)	COG3424(synthase); ENOG410Y5VH(3-ketoacyl-coa synthase)	PF08392.12(FAE1_CUT1_RppA:FAE1/Type III polyketide synthase-like protein)	sp|Q5XEP9|KCS2_ARATH(3-ketoacyl-CoA synthase 2 OS=Arabidopsis thaliana OX=3702 GN=KCS2 PE=2 SV=2)
MSTRG.18576			274	0	0	0	39	0	0	0	29	0	2	0	35	0	0	0	0	0	0	40	0	0	0	44	0	0	4	34	0	0.6667	34.3333	0	0	0	0	39.3333	1.3333	PNT15409.1(hypothetical protein POPTR_010G082800, partial [Populus trichocarpa])	GO:0016021(cellular_component:integral component of membrane)
MSTRG.18600			354	27	26	15	17	20	67	30	25	25	97	24	21	40	67	61	38	36	32	18	45	39	52	37	41	99	32	9	24	63.3333	21	23	56	41.3333	58	21.3333	38.6667
MSTRG.18643			427	3	1	2	0	2	0	4	1	0	0	2	2	0	0	1	1	0	0	1	0	0	1	0	0	0	2	1	1.6667	0.3333	1	2.6667	0.3333	0.3333	0	0.6667	1	PNT15547.1(hypothetical protein POPTR_010G091700 [Populus trichocarpa])
MSTRG.18672			430	1	2	1	0	5	1	4	4	2	4	5	1	3	3	3	7	1	5	1	5	3	3	2	3	2	5	0	2.6667	2.3333	1.6667	3.3333	3	5	2	1	4.3333	TKR91180.1(hypothetical protein D5086_0000226910 [Populus alba])	GO:0005634(cellular_component:nucleus); GO:0005694(cellular_component:chromosome); GO:0051276(biological_process:chromosome organization); GO:0005524(molecular_function:ATP binding)	K06674	SMC2		COG1196(D:Cell cycle control, cell division, chromosome partitioning)	COG1196(Required for chromosome condensation and partitioning (By similarity))		sp|Q9C5Y4|SMC21_ARATH(Structural maintenance of chromosomes protein 2-1 OS=Arabidopsis thaliana OX=3702 GN=SMC2-1 PE=2 SV=2)
MSTRG.18686			222	0	0	0	0	0	0	0	0	0	0	0	0	0	0	0	0	0	0	0	0	0	0	0	0	0	0	0	0	0	0	0	0	0	0	0	0
MSTRG.18687			312	0	0	0	0	0	0	0	0	0	0	0	0	1	1	0	0	0	0	0	2	0	0	0	0	0	0	0	0	0	0	0	0.6667	0.6667	0	0	0	XP_024462977.1(WAT1-related protein At3g28050 [Populus trichocarpa] )	GO:0022857(molecular_function:transmembrane transporter activity); GO:0016021(cellular_component:integral component of membrane); GO:0005886(cellular_component:plasma membrane)				ENOG4111991(S:Function unknown)	ENOG4111991(Auxin-induced protein)
MSTRG.18693			397	0	0	1	1	0	1	0	0	0	0	0	3	4	1	1	2	0	3	0	0	1	1	1	1	0	1	0	0	0.3333	1.3333	0.3333	2	1	0.3333	0.3333	1.6667	KJB31811.1(hypothetical protein B456_005G209300 [Gossypium raimondii])	GO:0019901(molecular_function:protein kinase binding); GO:0016021(cellular_component:integral component of membrane); GO:0007031(biological_process:peroxisome organization); GO:0000079(biological_process:regulation of cyclin-dependent protein serine/threonine kinase activity)				ENOG410XXC3(S:Function unknown)	ENOG410XXC3(peroxisome biogenesis protein 22-like)		sp|Q9LSX7|PEX22_ARATH(Peroxisome biogenesis protein 22 OS=Arabidopsis thaliana OX=3702 GN=PEX22 PE=1 SV=1)
MSTRG.18721			907	142	51	105	52	93	51	121	60	92	30	106	87	109	96	73	89	70	125	105	111	40	158	66	160	117	219	97	109	44	66.3333	110.667	92.6667	120	75.6667	89.3333	167.333	ABK94949.1(unknown [Populus trichocarpa])
MSTRG.18743			257	0	0	0	7	0	0	0	6	0	0	0	10	0	0	0	0	0	0	10	0	1	0	6	0	0	0	4	0	0	7.6667	0	0	0	0.3333	6.6667	0
MSTRG.18808			327	1	0	0	0	0	0	0	0	1	0	0	0	0	0	0	1	0	1	0	0	0	0	0	2	0	1	0	0.6667	0	0	0	0	1	0	0	0.6667
MSTRG.1881			716	24	38	18	17	35	45	14	22.03	27	47	9	13	35	46	41	31	44	30	22	23	49	25	22	31	39	24	14	28.6667	43.3333	17.3433	13.6667	40.6667	28.3333	44	19.3333	26.3333	XP_006379008.1(60S ribosomal protein L23a [Populus trichocarpa] )	GO:0003735(molecular_function:structural constituent of ribosome); GO:0005840(cellular_component:ribosome); GO:0022625(cellular_component:cytosolic large ribosomal subunit); GO:0006412(biological_process:translation); GO:0000027(biological_process:ribosomal large subunit assembly)	K02893	RP-L23Ae, RPL23A	map03010(Ribosome)	COG0089(J:Translation, ribosomal structure and biogenesis)	COG0089(One of the early assembly proteins it binds 23S rRNA. One of the proteins that surrounds the polypeptide exit tunnel on the outside of the ribosome. Forms the main docking site for trigger factor binding to the ribosome (By similarity))		sp|Q9AT35|RL23A_DAUCA(60S ribosomal protein L23a OS=Daucus carota OX=4039 GN=RPL23A PE=2 SV=1)
MSTRG.18858			376	1	0	3	0	1	1	2	0	1	1	7	0	0	0	0	0	2	3	0	1	0	0	0	1	0	4	0	1	0.6667	0	4	0	0.6667	0.6667	0	2.3333	TKR84887.1(hypothetical protein D5086_0000252400 [Populus alba])	GO:0031418(molecular_function:L-ascorbic acid binding); GO:0005506(molecular_function:iron ion binding); GO:0016705(molecular_function:oxidoreductase activity, acting on paired donors, with incorporation or reduction of molecular oxygen); GO:0008475(molecular_function:procollagen-lysine 5-dioxygenase activity)				ENOG410Y4QU(O:Posttranslational modification, protein turnover, chaperones)	ENOG410Y4QU(Procollagen-lysine 2-oxoglutarate 5-dioxygenase)		sp|Q3ED68|Y1295_ARATH(Uncharacterized PKHD-type hydroxylase At1g22950 OS=Arabidopsis thaliana OX=3702 GN=At1g22950 PE=2 SV=2)
MSTRG.18862			641	1	0	1	44	6	1	6	48	5	0	3	83	1	4	1	1	6	3	48	2	0	6	95	10	2	7	46	4	0.3333	58.3333	3.3333	2	4.3333	2.6667	63	5.3333	PNT16048.1(hypothetical protein POPTR_010G118400 [Populus trichocarpa])
MSTRG.18952			337	0	0	0	1	1	1	1	1	4	1	1	7	2	0	0	0	2	2	5	2	0	0	2	2	0	1	1	1.6667	0.6667	3	0.6667	0.6667	1.3333	0.6667	2.6667	1	TKR84959.1(hypothetical protein D5086_0000253120 [Populus alba])	GO:0016787(molecular_function:hydrolase activity)				COG2220(S:Function unknown)	COG2220(Hydrolase)
MSTRG.18954			422	0	0	0	1	2	2	1	0	6	2	3	3	0	0	1	1	0	2	1	0	0	2	2	2	1	0	0	2.6667	1.3333	1.3333	1.3333	0.3333	1	0.3333	1	1.3333	KDO70088.1(hypothetical protein CISIN_1g017786mg [Citrus sinensis])	GO:0004177(molecular_function:aminopeptidase activity); GO:0046872(molecular_function:metal ion binding); GO:0008235(molecular_function:metalloexopeptidase activity); GO:0070084(biological_process:protein initiator methionine removal); GO:0070006(molecular_function:metalloaminopeptidase activity)	K01265	map		COG0024(K:Transcription)	COG0024(Myb family transcription factor)		sp|Q9FV52|MAP1B_ARATH(Methionine aminopeptidase 1B, chloroplastic OS=Arabidopsis thaliana OX=3702 GN=MAP1B PE=2 SV=2)
MSTRG.18975			513	0	0	0	3	1	0	0	0	0	3	2	4	3	0	2	1	0	1	1	0	1	1	0	0	2	0	0	0.3333	1	2.3333	0.6667	1.6667	0.3333	1	0.3333	0.6667
MSTRG.19007			404	3	0	0	0	2	1	0	0	3	0	1	0	2	5	1	1	1	0	0	2	1	0	0	2	4	0	0	2.6667	0.3333	0	0.3333	2.6667	1.6667	2	0	0
MSTRG.19050			290	1	1	3	1	4	2	3	2	6	0	1	4	1	3	0	0	2	3	4	4	0	1	0	0	1	2	3	3.6667	1	2.3333	2.3333	1.3333	1.3333	1	2.3333	2
MSTRG.1906			333	4	6	3	1	11	5.88	4	2	2	8	1	2	2	8	1	5	13	8	6	3	2	4	5	3	1	3	5	5.6667	6.6267	1.6667	2.6667	3.6667	3.6667	5.3333	5.3333	5
MSTRG.19064			231	0	0	0	3	0	0	1	1	0	0	0	4	0	0	0	0	0	0	2	0	0	0	1	0	0	0	2	0	0	2.6667	0.3333	0	0	0	1.6667	0
MSTRG.19068			318	2	0	1	3	4	2	3	1	0	3	4	7	4	10	4	7	6	5	0	5	4	4	4	10	7	3	2	2	1.6667	3.6667	2.6667	6	7.3333	5.6667	2	4	AFK35454.1(unknown [Lotus japonicus] )	GO:0016021(cellular_component:integral component of membrane)
MSTRG.19082			905	1.58	5.48	21.76	14.91	5.23	13.5	21.9	6.03	4.52	6.46	14.02	8.43	4.04	6.58	2.91	4.43	9.67	16.24	8.24	3.7	12.36	10.41	12.58	4.84	7.34	20.55	7.3	3.7767	8.48	9.79	19.2267	4.51	4.3233	9.79	9.3733	15.7333	PNT16515.1(hypothetical protein POPTR_010G144800, partial [Populus trichocarpa])					ENOG410ZVAE(O:Posttranslational modification, protein turnover, chaperones)	ENOG410ZVAE(peptidylprolyl isomerase domain and WD)
MSTRG.19085			475	7	5	0	0	6	2	7	0	9	1	0	0	4	14	5	5	5	2	0	2	3	5	0	8	3	1	1	7.3333	2.6667	0	2.3333	7.6667	5	3.6667	0.3333	2.6667	RQO96695.1(hypothetical protein POPTR_010G145300 [Populus trichocarpa])	GO:0043023(molecular_function:ribosomal large subunit binding); GO:0090071(biological_process:negative regulation of ribosome biogenesis); GO:0016021(cellular_component:integral component of membrane); GO:0005739(cellular_component:mitochondrion); GO:0017148(biological_process:negative regulation of translation)				COG0799(S:Function unknown)	COG0799(-)	PF02410.15(RsfS:Ribosomal silencing factor during starvation)	sp|Q9CAF9|IOJAM_ARATH(Protein Iojap-related, mitochondrial OS=Arabidopsis thaliana OX=3702 GN=At1g67620 PE=2 SV=1)
MSTRG.19093			436	2.49	10.03	10.42	3.08	13.31	30.45	22.73	6.7	11.4	19.81	13.96	9.29	20.9	25.1	9.35	10.78	18.62	9.31	9.23	7.79	6.87	14.4	12.44	11.7	22.97	20.3	5.7	9.0667	20.0967	6.3567	15.7033	18.45	10.09	16.1533	9.1233	14.67	RVX09875.1(Retrovirus-related Pol polyprotein from transposon TNT 1-94 [Vitis vinifera])	GO:0000943(cellular_component:retrotransposon nucleocapsid); GO:0015074(biological_process:DNA integration); GO:0008270(molecular_function:zinc ion binding); GO:0003676(molecular_function:nucleic acid binding)	K05658	ABCB1, CD243	map02010(ABC transporters); map05226(Gastric cancer)	COG1132(V:Defense mechanisms); COG0515(T:Signal transduction mechanisms); ENOG4111WQF(S:Function unknown); COG2801(L:Replication, recombination and repair); ENOG410XS4D(L:Replication, recombination and repair); ENOG410YSCH(S:Function unknown)	COG1132((ABC) transporter); COG0515(Serine Threonine protein kinase); ENOG4111WQF(-); COG2801(Retrotransposon protein); ENOG410XS4D(Retrotransposon protein); ENOG410YSCH(Reverse transcriptase (RNA-dependent DNA polymerase))		sp|P10978|POLX_TOBAC(Retrovirus-related Pol polyprotein from transposon TNT 1-94 OS=Nicotiana tabacum OX=4097 PE=2 SV=1)
MSTRG.19131			877	5	2	3	43	6	9	3	86	3	6	8	18	5	13	16	13	8	21	43	8	13	14	45	22	9	12	32	4.6667	5.6667	49	4.6667	11.3333	14.3333	10	40	15.6667	RZC04333.1(putative vacuolar protein sorting-associated protein 13A isoform B [Glycine soja])	GO:0045053(biological_process:protein retention in Golgi apparatus); GO:0019898(cellular_component:extrinsic component of membrane); GO:0005623(cellular_component:cell); GO:0006623(biological_process:protein targeting to vacuole)	K19525	VPS13A_C		COG5043(U:Intracellular trafficking, secretion, and vesicular transport)	COG5043(Vacuolar Protein)		sp|Q8BX70|VP13C_MOUSE(Vacuolar protein sorting-associated protein 13C OS=Mus musculus OX=10090 GN=Vps13c PE=1 SV=2)
MSTRG.19132			430	0	1	0	4	0	1	0	11	0	1	3	2	2	1	1	0	0	2	9	0	3	2	10	1	1	0	4	0	1	5.6667	1	1.3333	0.3333	1.3333	7.6667	1.3333	RQO96738.1(hypothetical protein POPTR_010G151950 [Populus trichocarpa])	GO:0016021(cellular_component:integral component of membrane)	K19525	VPS13A_C		COG5043(U:Intracellular trafficking, secretion, and vesicular transport)	COG5043(Vacuolar Protein)
MSTRG.19142			1388	31	0	14	10	10	4	4	4	18	0	8	1	0	0	0	8	2	13	0	16	1	11	2	37	1	13	3	19.6667	1.3333	5	8.6667	0	20.3333	1.3333	1.6667	12.3333	XP_024466820.1(kinesin-like protein KIN-12C [Populus trichocarpa] )	GO:0008017(molecular_function:microtubule binding); GO:0007018(biological_process:microtubule-based movement); GO:0003777(molecular_function:microtubule motor activity); GO:0005524(molecular_function:ATP binding)	K10400	KIF15		COG5059(S:Function unknown)	COG5059(-)	PF00225.23(Kinesin:Kinesin motor domain); PF16796.5(Microtub_bd:Microtubule binding)	sp|Q27IK7|KN12C_ARATH(Kinesin-like protein KIN-12C OS=Arabidopsis thaliana OX=3702 GN=KIN12C PE=1 SV=1)
MSTRG.19143			262	3	0	1	0	0	0	0	0	0	0	0	0	0	0	0	0	0	0	0	2	0	0	0	0	0	0	0	1	0	0	0.3333	0	0.6667	0	0	0	XP_024466820.1(kinesin-like protein KIN-12C [Populus trichocarpa] )	GO:0008017(molecular_function:microtubule binding); GO:0007018(biological_process:microtubule-based movement); GO:0003777(molecular_function:microtubule motor activity); GO:0005524(molecular_function:ATP binding)	K10400	KIF15		COG5059(Z:Cytoskeleton)	COG5059(Kinesin family member)		sp|Q27IK6|KN12D_ARATH(Kinesin-like protein KIN-12D OS=Arabidopsis thaliana OX=3702 GN=KIN12D PE=2 SV=1)
MSTRG.19150			376	0	0	20.83	5.7	1.11	4	29.22	0	1	2.96	18.75	2.46	1.17	0	5.2	2	0	15.2	0	1.74	1	15.55	1.94	4.48	0	8.37	1.31	0.7033	2.32	2.72	22.9333	2.1233	2.74	0.3333	1.0833	13.04	XP_024466849.1(pleiotropic drug resistance protein 3 [Populus trichocarpa] )	GO:0008559(molecular_function:xenobiotic-transporting ATPase activity); GO:0016021(cellular_component:integral component of membrane); GO:0016887(molecular_function:ATPase activity); GO:0005524(molecular_function:ATP binding)				COG0842(S:Function unknown)	COG0842(beige BEACH domain containing protein)	PF14510.6(ABC_trans_N:ABC-transporter N-terminal)	sp|Q5W274|PDR3_TOBAC(Pleiotropic drug resistance protein 3 OS=Nicotiana tabacum OX=4097 GN=PDR3 PE=2 SV=1)
MSTRG.19152			1468	76.33	95.58	492.45	96.47	79.39	79.47	496.22	66.73	73.65	126.25	382.49	115.75	59.55	77.86	54.48	43.6	49.48	408.81	38.89	67.96	107.46	439.65	75.51	85.57	36.25	394.92	79.99	76.4567	100.433	92.9833	457.053	63.9633	65.71	64.3967	64.7967	414.46	XP_024466849.1(pleiotropic drug resistance protein 3 [Populus trichocarpa] )	GO:0008559(molecular_function:xenobiotic-transporting ATPase activity); GO:0016021(cellular_component:integral component of membrane); GO:0016887(molecular_function:ATPase activity); GO:0005524(molecular_function:ATP binding)				COG0842(V:Defense mechanisms)	COG0842((ABC) transporter)	PF01061.24(ABC2_membrane:ABC-2 type transporter); PF00005.27(ABC_tran:ABC transporter)	sp|Q5W274|PDR3_TOBAC(Pleiotropic drug resistance protein 3 OS=Nicotiana tabacum OX=4097 GN=PDR3 PE=2 SV=1)
MSTRG.19153			1093	15.46	27.57	120.14	7.44	12.32	8.33	105.95	4.16	23.54	11.58	88.92	11.91	20.88	20.02	17.17	8.63	15.34	71.25	4.93	13.38	19.02	119.66	9.64	39.95	6.74	91.29	12.26	17.1067	15.8267	7.8367	105.003	19.3567	20.6533	13.7	8.9433	94.0667	XP_024466849.1(pleiotropic drug resistance protein 3 [Populus trichocarpa] )	GO:0008559(molecular_function:xenobiotic-transporting ATPase activity); GO:0016021(cellular_component:integral component of membrane); GO:0016887(molecular_function:ATPase activity); GO:0005524(molecular_function:ATP binding)				COG0842(V:Defense mechanisms); COG1131(V:Defense mechanisms)	COG0842((ABC) transporter); COG1131((ABC) transporter)	PF01061.24(ABC2_membrane:ABC-2 type transporter)	sp|Q5W274|PDR3_TOBAC(Pleiotropic drug resistance protein 3 OS=Nicotiana tabacum OX=4097 GN=PDR3 PE=2 SV=1)
MSTRG.19184			1397	138	108	163	153.23	104	136	146	151	124.22	147	110	160.29	74.08	91.21	77	85	123	124	131.22	75.21	109	109	186	108	110	99	128	122.073	130.333	154.84	139.667	80.7633	89.4033	114	148.407	110.667	APR64398.1(DEFORMED ROOTS AND LEAVES 1 family protein [Populus tomentosa])	GO:0006357(biological_process:regulation of transcription from RNA polymerase II promoter); GO:0033588(cellular_component:Elongator holoenzyme complex); GO:0002098(biological_process:tRNA wobble uridine modification)	K15456	KTI12		COG4088(F:Nucleotide transport and metabolism); COG0523(S:Function unknown)	COG4088(KTI12 homolog, chromatin associated (S. cerevisiae)); COG0523(cobalamin synthesis protein)	PF08433.10(KTI12:Chromatin associated protein KTI12); PF13671.6(AAA_33:AAA domain); PF01583.20(APS_kinase:Adenylylsulphate kinase)	sp|B8BK80|KTI12_ORYSI(Protein KTI12 homolog OS=Oryza sativa subsp. indica OX=39946 GN=OsI_35919 PE=3 SV=2)
MSTRG.19190			935	0	0	0	0	0	0	0	0	0	0	0	0	0	0	0	0	0	0	0	0	0	0	0	0	0	0	0	0	0	0	0	0	0	0	0	0	TKR98720.1(hypothetical protein D5086_0000200370 [Populus alba])
MSTRG.19236			642	13	8	1	18	8	19.09	8	17	9	18	13	32	26	19	32	11	16	12	15	12	12	13	23	5	18	10	12	10	15.03	22.3333	7.3333	25.6667	9.3333	15.3333	16.6667	11.6667	TKR74410.1(hypothetical protein D5086_0000294430 [Populus alba])	GO:0003755(molecular_function:peptidyl-prolyl cis-trans isomerase activity)	K09579	PIN4		COG0760(T:Signal transduction mechanisms)	COG0760(Xenotropic and polytropic retrovirus receptor 1)
MSTRG.19249			347	1	0	2	2	0	0	0	0	0	0	0	1	2	2	0	0	2	2	0	0	0	1	2	0	0	0	1	0.3333	0	1	0.6667	1.3333	0	0.6667	1	1
MSTRG.19266			453	6	0	4	13	2	0	3	7	8	1	5	12	2	7	2	0	3	5	4	8	6	6	14	1	3	3	9	5.3333	0.3333	10.6667	4	3.6667	3	4	9	4.6667	XP_024437498.1(factor of DNA methylation 4 isoform X2 [Populus trichocarpa])					ENOG4111EBT(S:Function unknown)	ENOG4111EBT(XH XS domain-containing protein)
MSTRG.19278			205	1	0	0	2	0	0	2	0	1	0	1	0	2	6	4	3	6	2	0	0	5	0	1	4	0	1	0	0.6667	0	0.6667	1	4	2.3333	3.6667	0.3333	1
MSTRG.19328			693	17	5	10	17	8	19	9	16	17	7	16	15	24	14	15	19	17	9	20	12	9	4	7	17	31	16	5	14	10.3333	16	11.6667	17.6667	16	19	10.6667	9.6667	XP_024466475.1(protease Do-like 10, mitochondrial, partial [Populus trichocarpa])	GO:0004252(molecular_function:serine-type endopeptidase activity)				COG0265(F:Nucleotide transport and metabolism)	COG0265(Catalyzes the ATP-dependent amination of UTP to CTP with either L-glutamine or ammonia as the source of nitrogen (By similarity))		sp|Q9FIV6|DGP10_ARATH(Protease Do-like 10, mitochondrial OS=Arabidopsis thaliana OX=3702 GN=DEGP10 PE=2 SV=1)
MSTRG.19329			508	6	0	2	0	4	6	5	5	5	2	6	2	2	9	5	4	4	4	3	5	3	2	1	6	5	3	2	5	2.6667	2.3333	4.3333	5.3333	5	4	2	3	XP_024462077.1(protease Do-like 10, mitochondrial [Populus trichocarpa] )					COG0265(O:Posttranslational modification, protein turnover, chaperones)	COG0265(Serine protease)
MSTRG.19348			4380	84.6	183.37	43.43	196.29	130.75	473.21	94.3	169.64	102.07	268.63	51.15	265.15	324.96	257.76	489.58	85.57	326.66	9.27	194.46	58.01	168.87	18.86	332.36	69.75	493	26.83	349.47	105.807	308.403	210.36	62.96	357.433	71.11	329.51	292.097	18.32	PWA89608.1(Retrovirus-related Pol polyprotein from transposon TNT 1-94 [Artemisia annua])	GO:0006633(biological_process:fatty acid biosynthetic process); GO:0003676(molecular_function:nucleic acid binding); GO:0000943(cellular_component:retrotransposon nucleocapsid); GO:0016020(cellular_component:membrane); GO:0015074(biological_process:DNA integration); GO:0016747(molecular_function:transferase activity, transferring acyl groups other than amino-acyl groups); GO:0043531(molecular_fun…				COG2801(L:Replication, recombination and repair)	COG2801(Retrotransposon protein)	PF07727.14(RVT_2:Reverse transcriptase (RNA-dependent DNA polymerase)); PF00665.26(rve:Integrase core domain); PF13976.6(gag_pre-integrs:GAG-pre-integrase domain); PF14223.6(Retrotran_gag_2:gag-polypeptide of LTR copia-type)	sp|Q94HW2|POLR1_ARATH(Retrovirus-related Pol polyprotein from transposon RE1 OS=Arabidopsis thaliana OX=3702 GN=RE1 PE=2 SV=1)
MSTRG.19353			354	3	2	3	4	6	2	3	4	2	0	2	0	0	0	0	1	0	3	0	2	1	3.86	2	1	0	12	4	3.6667	1.3333	2.6667	2.6667	0	1.3333	0.3333	2	6.2867	PNT50865.2(hypothetical protein POPTR_002G210400 [Populus trichocarpa])	GO:0006334(biological_process:nucleosome assembly); GO:0005634(cellular_component:nucleus); GO:0033186(cellular_component:CAF-1 complex)	K10750	CHAF1A		ENOG4111K9K(K:Transcription); ENOG4111QVP(K:Transcription)	ENOG4111K9K(Chromatin assembly factor 1, subunit A (P150)); ENOG4111QVP(Chromatin assembly)		sp|B2ZX90|FAS1_ORYSJ(Chromatin assembly factor 1 subunit FSM OS=Oryza sativa subsp. japonica OX=39947 GN=FSM PE=2 SV=1)
MSTRG.19367			508	5	2	14	0	3	5	2	0	15	6	10	2	10	7	5	2	5	9	5	10	4	10	2	18	5	3	5	7.6667	4.3333	0.6667	8.6667	7.3333	10	4.6667	4	7.3333	TKR74537.1(hypothetical protein D5086_0000295700 [Populus alba])
MSTRG.19368			1297	5.55	0	0	4.1	0	2	2.14	0	5.8	0	0	0	4.18	11.78	1.66	2.07	1.93	3.42	2	1.67	0	12.27	2.3	7.21	1.65	1.75	0	3.7833	0.6667	1.3667	0.7133	5.8733	3.65	1.1933	1.4333	5.8133	GAU37610.1(hypothetical protein TSUD_365310 [Trifolium subterraneum])	GO:0004356(molecular_function:glutamate-ammonia ligase activity); GO:0022857(molecular_function:transmembrane transporter activity); GO:0006807(biological_process:nitrogen compound metabolic process); GO:0016021(cellular_component:integral component of membrane)				COG0477(L:Replication, recombination and repair)	COG0477(helicase)		sp|Q9SA38|OCT3_ARATH(Organic cation/carnitine transporter 3 OS=Arabidopsis thaliana OX=3702 GN=OCT3 PE=2 SV=1)
MSTRG.19369			828	3.45	4	8	2.9	6	0	4.86	3	9.2	0	7	3	1.82	4.22	4.34	4.93	4.07	8.58	0	0.33	8	2.73	3.7	9.79	10.35	10.25	0	6.2167	1.3333	2.9667	6.62	3.46	5.0167	7.4733	1.2333	7.1867
MSTRG.19370			330	4	0	0	0	2	1.14	1	1	4	0	2	0	0	3.4	4	2	1	0	0	4	2	1.63	1	3.91	7	3.48	1	3.3333	0.38	0.3333	1	2.4667	3.3033	3.3333	0.6667	1.7033
MSTRG.19371			345	0	0	4	0	0	3.86	0	0	0	0	0	0	0	4.6	0	0	0	2	0	0	0	5.37	0	6.09	0	4.52	0	0	1.2867	0	1.3333	1.5333	2.03	0	0	3.9633
MSTRG.19397			354	9	2	4.55	2.29	1	5	8.48	5	2.12	2	7.45	4	0	6	6	4.49	3	7	8	6	5.44	6	6	2	3.18	10	3	4.04	3	3.7633	6.8267	4	4.1633	3.8733	5.6667	7.6667	TKR74561.1(hypothetical protein D5086_0000295940 [Populus alba])
MSTRG.19400			915	16	18	26	26	10	16	34	20	20	16	31	29	33	30	26	24	35	42	20	15	14	36	25	20	21	31	19	15.3333	16.6667	25	30.3333	29.6667	19.6667	23.3333	21.3333	36.3333	XP_002312182.1(DEAD-box ATP-dependent RNA helicase 18 [Populus trichocarpa] )	GO:0003676(molecular_function:nucleic acid binding); GO:0003723(molecular_function:RNA binding); GO:0005524(molecular_function:ATP binding); GO:0004386(molecular_function:helicase activity)	K14809	DDX55, SPB4		ENOG410XNT7(L:Replication, recombination and repair)	ENOG410XNT7(atp-dependent rna helicase)		sp|Q9FLB0|RH18_ARATH(DEAD-box ATP-dependent RNA helicase 18 OS=Arabidopsis thaliana OX=3702 GN=RH18 PE=2 SV=1)
MSTRG.19422			367	1086	929.55	1000	2031	788	956	865.4	2215.12	1201	931	1126.54	1847.07	608	726	589	1610	708	1418.49	1728	1311.57	751.75	1671	1782	1552	859.09	1493.8	1359	1025	938.85	2031.06	997.313	641	1491.19	772.947	1623	1527.76	PNT17334.1(hypothetical protein POPTR_010G186500 [Populus trichocarpa])	GO:0016021(cellular_component:integral component of membrane)	K02928	RP-L41e, RPL41	map03010(Ribosome)
MSTRG.19477			327	2	0	0	3	2	0	0	1	1	1	4	0	3	0	0	4	1	1	1	3	2	2	1	5	0	0	0	1.6667	0.3333	1.3333	1.3333	1	4	1	0.6667	1	ABK95281.1(unknown [Populus trichocarpa])					ENOG410Y9IG(S:Function unknown)	ENOG410Y9IG(C2 domain)
MSTRG.19478			283	37	15	11	15	20	24	16	9	33	15	20	17	23	14	14	22	19	10	16	27	14	11	23	22	13	12	19	30	18	13.6667	15.6667	17	23.6667	15.3333	19.3333	11	PNT17467.1(hypothetical protein POPTR_010G192500, partial [Populus trichocarpa])					ENOG410Y9IG(S:Function unknown)	ENOG410Y9IG(C2 domain)
MSTRG.19505			234	1	0	0	0	0	0	0	0	1	0	0	0	0	0	0	0	0	0	0	0	0	0	0	0	0	2	0	0.6667	0	0	0	0	0	0	0	0.6667
MSTRG.19506			338	0	0	0	0	0	0	0	0	0	0	0	0	0	0	1	0	0	1	0	0	1	0	2	0	0	1	0	0	0	0	0	0.3333	0	0.3333	0.6667	0.6667
MSTRG.19507			233	0	0	3	0	0	0	0	1	0	0	1	2	0	0	0	0	1	1	2	0	0	0	0	0	0	0	1	0	0	1	1.3333	0	0	0.3333	1	0.3333
MSTRG.19508			256	0	0	0	0	0	0	0	0	0	0	0	0	1	1	0	0	0	0	0	0	0	0	0	0	0	0	0	0	0	0	0	0.6667	0	0	0	0
MSTRG.19546			514	0	0	1	10	1	1	2	7	0	0	4	5	1	0	0	0	0	8	7	0	0	7	5	0	0	3	2	0.3333	0.3333	7.3333	2.3333	0.3333	0	0	4.6667	6
MSTRG.19553			4232	237	131	180	185	182	164	214	186	269	145	242	211	239	214	239	327	230	239	231	247	247	207	230	349	300	238	191	229.333	146.667	194	212	230.667	307.667	259	217.333	228	XP_024466866.1(uncharacterized protein LOC7490381 isoform X1 [Populus trichocarpa] )	GO:0046983(molecular_function:protein dimerization activity); GO:0003677(molecular_function:DNA binding)				ENOG410XWK2(F:Nucleotide transport and metabolism)	ENOG410XWK2(phosphoribosylformylglycinamidine synthase)	PF04937.15(DUF659:Protein of unknown function (DUF 659)); PF05699.14(Dimer_Tnp_hAT:hAT family C-terminal dimerisation region); PF02892.15(zf-BED:BED zinc finger)
MSTRG.19568			709	1	0	1	0	0	0	0	2	1	0	0	2	0	1	1	1	0	2	0	2	0	1	2	0	1	1	0	0.6667	0	1.3333	0.3333	0.6667	1	0.3333	0.6667	1.3333	PNT17680.1(hypothetical protein POPTR_010G202600 [Populus trichocarpa])
MSTRG.19636			219	0	2	1	0	0	1	0	0	0	0	0	0	0	0	0	4	0	0	0	1	0	0	0	0	2	0	0	0	1	0	0.3333	0	1.6667	0.6667	0	0
MSTRG.19643			346	4.38	9.66	6	2	5	0	2	4	9	8	0	1	0	3	2	4	0	6	3	1	1	0	8	10	0	5	3	6.1267	5.8867	2.3333	2.6667	1.6667	5	0.3333	4.6667	3.6667
MSTRG.19644			323	2.62	1.34	0	0	0	1	0	0	0	0	4	0	0	0	0	0	2	0	0	0	0	2	0	0	0	0	0	0.8733	0.78	0	1.3333	0	0	0.6667	0	0.6667
MSTRG.1965			674	0	2	18	13	0	1	13	26	0	0	13	27	0	1	0	0	5	32	7	0	3	31	11	2	0	26	10	0	1	22	14.6667	0.3333	0.6667	2.6667	9.3333	29.6667
MSTRG.19670			828	17	9	19	14	7	25	22	13	15	14	24	25	11	28	19	23	21	34	26	19	31	23	22	25	15	38	19	13	16	17.3333	21.6667	19.3333	22.3333	22.3333	22.3333	31.6667
MSTRG.19686			856	22	36	39	22	13	14	81	10	15	88	44	21	39	27	19	60	22	23	9	17	18	23	10	16	21	24	5	16.6667	46	17.6667	54.6667	28.3333	31	20.3333	8	23.3333	RQO94164.1(hypothetical protein POPTR_008G045466 [Populus trichocarpa])
MSTRG.19705			563	0	0	16	3	1	1	7	1	0	1	5	1	2	4	0	5	0	5	1	3	5	8	1	4	0	11	2	0.3333	0.6667	1.6667	9.3333	2	4	1.6667	1.3333	8
MSTRG.19767			281	0	0	0	0	0	0	0	0	1	0	0	0	0	0	0	0	0	0	0	1	0	0	0	1	0	1	0	0.3333	0	0	0	0	0.6667	0	0	0.3333
MSTRG.19781			259	12.07	7.46	19.09	15.26	7.61	9.45	11	15.47	3.37	13.19	6.01	8.56	8.35	6.3	5.25	18.06	15.63	12.33	9.64	8.3	3.01	16.3	9.32	9.04	12.52	10.32	11.68	7.6833	10.0333	13.0967	12.0333	6.6333	11.8	10.3867	10.2133	12.9833
MSTRG.19791			431	0	0	2	0	0	0	4	0	2	0	8	0	0	0	0	1	0	1	0	1	0	2	0	2	0	2	0	0.6667	0	0	4.6667	0	1.3333	0	0	1.6667
MSTRG.19792			760	10	3	22	0	5	3	14	1	9	6	16	0	5	8	6	5	5	17.9	4	13	3	29	5	6	1	15	4	8	4	0.3333	17.3333	6.3333	8	3	4.3333	20.6333	RQO97119.1(hypothetical protein POPTR_010G228832 [Populus trichocarpa])					COG0250(S:Function unknown)	COG0250(Rna-binding protein)
MSTRG.19793			687	6	6	24	1	14	12	21	1	10	5	29	5	6	9	2	6	14	22	5	10	3	34	2	17	2	25	1	10	7.6667	2.3333	24.6667	5.6667	11	6.3333	2.6667	27	PNT18211.1(hypothetical protein POPTR_010G228900 [Populus trichocarpa])	GO:0006357(biological_process:regulation of transcription from RNA polymerase II promoter); GO:0032784(biological_process:regulation of DNA-templated transcription, elongation)				COG0250(K:Transcription)	COG0250(Participates in transcription elongation, termination and antitermination (By similarity))
MSTRG.19852			741	0	3.09	1.63	3.81	1.25	3.3	4.34	3.43	0	5.65	2.93	3.67	4.56	1.61	4.59	3.92	2.53	4.87	2.88	3.31	0	4.41	6.75	6.25	4.8	1.91	7.32	0.4167	4.0133	3.6367	2.9667	3.5867	4.4933	2.4433	5.65	3.73
MSTRG.19853			1426	0	0	0	0	0	0	0	0	0	0	0	0	0	0	0	0	0	0	0	0	0	0	0	0	0	0	0	0	0	0	0	0	0	0	0	0
MSTRG.19877			507	8	0	2	104	1	2	0	37	1	0	4	51	4	11	3	10	5	0	117	5	5	6	52	0	3	2	94	3.3333	0.6667	64	2	6	5	4.3333	87.6667	2.6667	PNT18382.1(hypothetical protein POPTR_010G238600 [Populus trichocarpa])
MSTRG.1988			807	46	62.35	87.55	72.26	60.31	59.34	85.27	63	66	58.41	83.23	66.26	57	69.67	45	59.28	80	90	73.31	55	60	86.23	54.22	71	66	97.27	50.84	57.4367	60.0333	67.1733	85.35	57.2233	61.76	68.6667	59.4567	91.1667	XP_024467547.1(uncharacterized protein LOC7468009 [Populus trichocarpa])					ENOG4111W2D(S:Function unknown)	ENOG4111W2D(-)
MSTRG.19885			984	44	27	32	15	44	21	36	20	61	19	42	22	29	39	40	60	49	68	20	58	41	45	28	91	49	50	18	49.6667	22.3333	19	36.6667	36	69.6667	46.3333	22	54.3333	XP_011024193.1(PREDICTED: ribonuclease H2 subunit A-like isoform X1 [Populus euphratica] )	GO:0003723(molecular_function:RNA binding); GO:0004523(molecular_function:RNA-DNA hybrid ribonuclease activity)	K10743	RNASEH2A	map03030(DNA replication)	COG0164(L:Replication, recombination and repair)	COG0164(Endonuclease that specifically degrades the RNA of RNA- DNA hybrids (By similarity))	PF01351.18(RNase_HII:Ribonuclease HII)	sp|Q9SEZ6|RNH2A_ARATH(Ribonuclease H2 subunit A OS=Arabidopsis thaliana OX=3702 GN=At2g25100 PE=2 SV=2)
MSTRG.19898			1128	26	11	1	23	0	8	7	18	1	3	7	21	63	59	58	1	21	5	28	6	52	12	23	2	8	6	7	9	7.3333	20.6667	5	60	3	27	19.3333	7.6667
MSTRG.19904			1011	0	2	1	34	4	1	4	23	4	0	3	6	0	3	4	6	3	1	7	1	5	1	9	0	1	1	5	2.6667	1	21	2.6667	2.3333	2.3333	3	7	1	PNT18441.1(hypothetical protein POPTR_010G242400 [Populus trichocarpa])
MSTRG.19935			242	0	1	0	1	0	1	0	0	1	0	0	0	0	1	0	0	0	0	0	0	0	0	0	0	0	0	0	0.3333	0.6667	0.3333	0	0.3333	0	0	0	0
MSTRG.19939			988	11	8	6	3	14	5	1	1	29	14	3	4	10	33	14	24	18	3	3	26	17	10	4	33	22	8	3	18	9	2.6667	3.3333	19	27.6667	19	3.3333	7	RXI05050.1(hypothetical protein DVH24_006307 [Malus domestica])	GO:0016021(cellular_component:integral component of membrane); GO:0004672(molecular_function:protein kinase activity); GO:0005524(molecular_function:ATP binding); GO:0005886(cellular_component:plasma membrane); GO:0046777(biological_process:protein autophosphorylation); GO:0009506(cellular_component:plasmodesma)				ENOG410XPGM(T:Signal transduction mechanisms)	ENOG410XPGM(inactive leucine-rich repeat receptor-like protein kinase)		sp|Q8LFN2|Y3037_ARATH(Probable inactive leucine-rich repeat receptor-like protein kinase At3g03770 OS=Arabidopsis thaliana OX=3702 GN=At3g03770 PE=1 SV=1)
MSTRG.19955			2300	89	56	69	44	79	77	60	52	96	53	78	59	75	94	60	92	75	86	54	86	56	57	59	104	56	86	38	88	62	51.6667	69	76.3333	94	62.3333	50.3333	76.3333	XP_021652985.1(tRNAse Z TRZ4, mitochondrial-like isoform X1 [Hevea brasiliensis])	GO:0016891(molecular_function:endoribonuclease activity, producing 5'-phosphomonoesters); GO:0042779(biological_process:tRNA 3'-trailer cleavage)	K00784	rnz	map03013(RNA transport)	COG1234(S:Function unknown)	COG1234(Zinc phosphodiesterase, which displays some tRNA 3'- processing endonuclease activity. Probably involved in tRNA maturation, by removing a 3'-trailer from precursor tRNA (By similarity))		sp|F4J1H7|RNZ4_ARATH(tRNAse Z TRZ4, mitochondrial OS=Arabidopsis thaliana OX=3702 GN=TRZ4 PE=2 SV=1)
MSTRG.19983			252	0	0	1	0	0	0	0	0	0	0	0	0	0	0	0	0	0	0	0	0	0	0	0	0	0	2	0	0	0	0	0.3333	0	0	0	0	0.6667	TKS17201.1(hypothetical protein D5086_0000020320 [Populus alba])	GO:0008375(molecular_function:acetylglucosaminyltransferase activity); GO:0016021(cellular_component:integral component of membrane); GO:0016020(cellular_component:membrane)	K00771	XYLT		ENOG410XQ7M(S:Function unknown)	ENOG410XQ7M(Glucosaminyl (N-acetyl) transferase)	PF02485.21(Branch:Core-2/I-Branching enzyme)
MSTRG.20020			621	4	0	4	2	0	2	8	4	0	0	11	7	0	1	2	0	4	6	1	1	0	11	3	2.15	1	12	1	1.3333	0.6667	4.3333	7.6667	1	1.05	1.6667	1.6667	9.6667	TKR65667.1(hypothetical protein D5086_0000319010 [Populus alba])	GO:0016021(cellular_component:integral component of membrane)				ENOG410YBQC(S:Function unknown); COG2801(S:Function unknown)	ENOG410YBQC(expressed protein); COG2801(expressed protein)
MSTRG.2004			899	11	11	0	0	10	7	0	0	5	10	0	0	14	2	4	8	16	0	0	5	2	0	0	6	9	0	0	8.6667	9.3333	0	0	6.6667	6.3333	9	0	0	XP_024436712.1(LOW QUALITY PROTEIN: ammonium transporter 1 member 3 [Populus trichocarpa])	GO:0007010(biological_process:cytoskeleton organization); GO:0008519(molecular_function:ammonium transmembrane transporter activity); GO:0015629(cellular_component:actin cytoskeleton); GO:0016021(cellular_component:integral component of membrane); GO:0016788(molecular_function:hydrolase activity, acting on ester bonds); GO:0072488(biological_process:ammonium transmembrane transport); GO:0051015(m…	K03320	amt, AMT, MEP		COG0004(P:Inorganic ion transport and metabolism)	COG0004(ammonium Transporter)	PF00909.21(Ammonium_transp:Ammonium Transporter Family)	sp|Q9FVN0|AMT13_SOLLC(Ammonium transporter 1 member 3 OS=Solanum lycopersicum OX=4081 GN=AMT1-3 PE=2 SV=1)
MSTRG.20084			1067	0	1	16	2	3	1	22.87	1	1	0	9	4	0	0	0	0	0	22	1	0	8.06	19	2	2	0	37	3	1.3333	0.6667	2.3333	15.9567	0	0.6667	2.6867	2	26	XP_024454279.1(zinc finger MYM-type protein 1-like, partial [Populus trichocarpa])					ENOG4110ZMY(S:Function unknown); ENOG410YND3(S:Function unknown); ENOG41118B8(S:Function unknown)	ENOG4110ZMY(protein-kinase, interferon-inducible double stranded RNA dependent inhibitor, repressor of (P58 repressor)); ENOG410YND3(-); ENOG41118B8(-)	PF14291.6(DUF4371:Domain of unknown function (DUF4371))	sp|Q5SVZ6|ZMYM1_HUMAN(Zinc finger MYM-type protein 1 OS=Homo sapiens OX=9606 GN=ZMYM1 PE=1 SV=1)
MSTRG.20092			249	0	0	0	0	0	0	0	0	0	0.86	0	0	0	0	0	0	0	0	0	0	0	0	0	0	0	0	0	0	0.2867	0	0	0	0	0	0	0	PNS23758.1(hypothetical protein POPTR_T038700 [Populus trichocarpa])	GO:0016021(cellular_component:integral component of membrane); GO:0005381(molecular_function:iron ion transmembrane transporter activity)				ENOG410ZU4Z(S:Function unknown)	ENOG410ZU4Z(Resistance protein)
MSTRG.20109			464	0	0	15	0	0	0	0	0	0	0	19.15	3	1.06	0	5	0	0	22	0	0	11	4.6	0	6	0	0	0	0	0	1	11.3833	2.02	2	3.6667	0	8.8667	PNS23758.1(hypothetical protein POPTR_T038700 [Populus trichocarpa])	GO:0007165(biological_process:signal transduction); GO:0043531(molecular_function:ADP binding)				ENOG410ZU4Z(S:Function unknown)	ENOG410ZU4Z(Resistance protein)
MSTRG.20110			464	2	3	0	5	6	13	19	11	7	3.14	1.85	0	9.94	10	0	10	8	0	12	8	0	24.4	4	0	10	22	6	5	6.38	5.3333	6.95	6.6467	6	6	7.3333	15.4667	PNS23758.1(hypothetical protein POPTR_T038700 [Populus trichocarpa])	GO:0007165(biological_process:signal transduction); GO:0043531(molecular_function:ADP binding)				ENOG410ZU4Z(S:Function unknown)	ENOG410ZU4Z(Resistance protein)
MSTRG.20111			300	2	3	4.67	0	2	2.24	8	0	2	5	2	0	3	6	5	2	4	7.56	0	3.61	8	9.84	1	7	4	5	0	2	3.4133	0	4.89	4.6667	4.2033	5.3333	0.3333	7.4667	TKR90955.1(hypothetical protein D5086_0000228210, partial [Populus alba])	GO:0031011(cellular_component:Ino80 complex)
MSTRG.20112			282	0	0	0	0	0	0	0	0	0	0	0	0	0	0	0	0	0	0	0	0	0	0.44	0	0	0	0	0	0	0	0	0	0	0	0	0	0.1467
MSTRG.20113			264	0	1.34	0	0	2	0	0	0	2.99	0	0	0	0	3.29	2	1.26	1.07	0	1	4.45	0	0	0	3.01	1.12	0	1	1.6633	0.4467	0	0	1.7633	2.9067	0.73	0.6667	0
MSTRG.20117			243	0	3	0	3	1	1	1	0	1	2	0	0	0	2	0	0	0	1	0	1	1	1	3	0	0	0	2	0.6667	2	1	0.3333	0.6667	0.3333	0.3333	1.6667	0.6667	XP_011002591.1(PREDICTED: uncharacterized protein LOC105109549 [Populus euphratica])	GO:0016021(cellular_component:integral component of membrane); GO:0005381(molecular_function:iron ion transmembrane transporter activity); GO:0007165(biological_process:signal transduction); GO:0043531(molecular_function:ADP binding)				ENOG410ZU4Z(S:Function unknown)	ENOG410ZU4Z(Resistance protein)
MSTRG.20120			397	2.62	12.32	16.74	4.21	9.75	13.1	12.7	3.79	7.3	17.49	7.44	9.99	12.42	26.25	20.65	2.75	10.36	6.32	9.65	9.53	11.17	8.42	14.66	9.64	14.25	5.81	7.56	6.5567	14.3033	5.9967	12.2933	19.7733	7.3067	11.9267	10.6233	6.85	XP_011005534.1(PREDICTED: LOW QUALITY PROTEIN: uncharacterized protein LOC105111782 [Populus euphratica])	GO:0000943(cellular_component:retrotransposon nucleocapsid); GO:0016021(cellular_component:integral component of membrane); GO:0015074(biological_process:DNA integration); GO:0008270(molecular_function:zinc ion binding); GO:0003676(molecular_function:nucleic acid binding); GO:0004970(molecular_function:ionotropic glutamate receptor activity)	K00430;K05658	E1.11.1.7;ABCB1, CD243	map00940(Phenylpropanoid biosynthesis); map02010(ABC transporters); map05226(Gastric cancer)	COG1132(V:Defense mechanisms); COG0515(T:Signal transduction mechanisms); ENOG4111WQF(S:Function unknown); COG2801(L:Replication, recombination and repair); ENOG410XS4D(S:Function unknown)	COG1132((ABC) transporter); COG0515(Serine Threonine protein kinase); ENOG4111WQF(-); COG2801(Retrotransposon protein); ENOG410XS4D(Retrotransposon protein)		sp|P10978|POLX_TOBAC(Retrovirus-related Pol polyprotein from transposon TNT 1-94 OS=Nicotiana tabacum OX=4097 PE=2 SV=1)
MSTRG.20122			210	0	2	2	0	2	0	0	1	1.02	0	0	0	1	0	2	2	4.67	0	0	0	1	0	1	0	0	1	0	1.0067	0.6667	0.3333	0.6667	1	0.6667	1.89	0.3333	0.3333	XP_024448009.1(TMV resistance protein N-like [Populus trichocarpa] )	GO:0016021(cellular_component:integral component of membrane); GO:0007165(biological_process:signal transduction); GO:0043531(molecular_function:ADP binding); GO:0005524(molecular_function:ATP binding)				ENOG410ZU4Z(S:Function unknown); ENOG4112BMQ(S:Function unknown)	ENOG410ZU4Z(Resistance protein); ENOG4112BMQ(TMV resistance protein N-like)		sp|Q40392|TMVRN_NICGU(TMV resistance protein N OS=Nicotiana glutinosa OX=35889 GN=N PE=1 SV=1)
MSTRG.20131			225	2	2	0	0	4	0	1	0	1.95	0	0	0	2	2	0	1	0	0	0	1	0	0	0	0	0	0	0	2.65	0.6667	0	0.3333	1.3333	0.6667	0	0	0
MSTRG.20132			277	10.48	3.38	3.24	0	6.43	5.91	0.75	0	5.18	3.11	5.9	0	13.82	7.01	7.73	8.29	6.6	5.98	3.86	7.8	4.73	1.79	0.96	0	5.86	3.87	0	7.3633	4.1333	0	3.2967	9.52	5.3633	5.73	1.6067	3.88	PNT11333.1(hypothetical protein POPTR_011G012900, partial [Populus trichocarpa])	GO:0016021(cellular_component:integral component of membrane); GO:0007165(biological_process:signal transduction); GO:0043531(molecular_function:ADP binding); GO:0005524(molecular_function:ATP binding)				ENOG410ZU4Z(S:Function unknown); ENOG4112BMQ(S:Function unknown)	ENOG410ZU4Z(Resistance protein); ENOG4112BMQ(TMV resistance protein N-like)		sp|Q9SZ66|DSC1_ARATH(Disease resistance-like protein DSC1 OS=Arabidopsis thaliana OX=3702 GN=DSC1 PE=1 SV=1)
MSTRG.20163			564	3	0	3	2	2	0	4	1	0	2	5	0	2	1	3	3	2	4	2	1	0	5	0	4	0	11	0	1.6667	0.6667	1	4	2	2.6667	0.6667	0.6667	6.6667	TKS17866.1(hypothetical protein D5086_0000007150 [Populus alba])
MSTRG.20185			299	3	0	8	1	3	0	4	4	3	0	6	6	0	0	2	1	2	6	3	3	3	6	1	3	0	5	3	3	0	3.6667	6	0.6667	2.3333	1.6667	2.3333	5.6667	TKR90600.1(cysteine-rich receptor-like protein kinase 25 [Populus alba])
MSTRG.20208			3067	406.97	210.72	270.63	319.83	241.58	266.15	263.97	299.22	378.25	405.88	262.82	366.11	513.55	493.22	560.37	537.08	639.9	408.22	406.01	499.08	659.67	423.12	382.79	748.46	731.18	427.92	293.93	342.267	294.25	328.387	265.807	522.38	594.873	676.917	360.91	419.753	XP_024438158.1(ATPase family AAA domain-containing protein 1-like isoform X3 [Populus trichocarpa])	GO:0016787(molecular_function:hydrolase activity); GO:0016021(cellular_component:integral component of membrane); GO:0005524(molecular_function:ATP binding)				COG0464(O:Posttranslational modification, protein turnover, chaperones); COG4886(O:Posttranslational modification, protein turnover, chaperones)	COG0464(Aaa atpase); COG4886(Aaa atpase)	PF08263.12(LRRNT_2:Leucine rich repeat N-terminal domain)	sp|P28737|MSP1_YEAST(Protein MSP1 OS=Saccharomyces cerevisiae (strain ATCC 204508 / S288c) OX=559292 GN=MSP1 PE=1 SV=2)
MSTRG.20214			437	8	17	2	0	6.69	26	4	0	7	10.88	0	1	29	30	20	10.86	36	2	1	13	21	1	0	10	40	3	0	7.23	17.96	0.3333	2	26.3333	11.2867	32.3333	0.3333	2	ABG37655.1(integrase [Populus trichocarpa])	GO:0015074(biological_process:DNA integration); GO:0003676(molecular_function:nucleic acid binding)
MSTRG.20235			207	0	0	0	2.25	0	0	0	0	0	0	0	0	2.08	0	0	0	0	0	0	1.01	0	0	0	0	0	0	0	0	0	0.75	0	0.6933	0.3367	0	0	0	RQO89780.1(hypothetical protein POPTR_004G232250 [Populus trichocarpa])	GO:0016021(cellular_component:integral component of membrane); GO:0015074(biological_process:DNA integration); GO:0008270(molecular_function:zinc ion binding); GO:0003676(molecular_function:nucleic acid binding); GO:0004672(molecular_function:protein kinase activity); GO:0005524(molecular_function:ATP binding)				COG2801(S:Function unknown)	COG2801(Whole genome shotgun sequence of line PN40024, scaffold_274.assembly12x (Fragment))		sp|Q99315|YG31B_YEAST(Transposon Ty3-G Gag-Pol polyprotein OS=Saccharomyces cerevisiae (strain ATCC 204508 / S288c) OX=559292 GN=TY3B-G PE=1 SV=3)
MSTRG.20247			467	12.58	17.72	2.84	11.95	12.58	22.37	11.36	16.89	21.61	34.94	8.63	13.94	26.95	49.14	35.27	20.4	18.86	4.77	22	15.64	41.06	9.02	26.89	7.82	39.01	2.94	4.02	15.59	25.01	14.26	7.61	37.12	14.62	32.9767	17.6367	5.5767	XP_024449384.1(uncharacterized protein LOC112326266 [Populus trichocarpa])	GO:0015074(biological_process:DNA integration); GO:0003676(molecular_function:nucleic acid binding)						PF00385.24(Chromo:Chromo (CHRromatin Organisation MOdifier) domain)
MSTRG.20250			750	21.17	3.44	1.97	10.28	4.87	24.55	12.52	2.69	6.59	25.89	1.65	8.48	19.62	30.91	33.45	8.17	28.38	7.94	14.17	20.12	23.01	11.88	24.67	29.4	35.5	4.35	11.6	10.8767	17.96	7.15	5.38	27.9933	19.23	28.9633	16.8133	8.0567	RQO89780.1(hypothetical protein POPTR_004G232250 [Populus trichocarpa])	GO:0016021(cellular_component:integral component of membrane); GO:0015074(biological_process:DNA integration); GO:0008270(molecular_function:zinc ion binding); GO:0003676(molecular_function:nucleic acid binding); GO:0004672(molecular_function:protein kinase activity); GO:0005524(molecular_function:ATP binding)						PF17921.1(Integrase_H2C2:Integrase zinc binding domain); PF00665.26(rve:Integrase core domain)	sp|Q7LHG5|YI31B_YEAST(Transposon Ty3-I Gag-Pol polyprotein OS=Saccharomyces cerevisiae (strain ATCC 204508 / S288c) OX=559292 GN=TY3B-I PE=3 SV=2)
MSTRG.20251			607	21.9	18.31	3.59	39.58	14.28	31.87	14	14.32	15.34	44.32	13.89	7.17	43.58	54.87	44.4	25.85	44.74	8.34	19.45	27.33	47.81	16.04	28.97	24.09	29.18	6.98	7.29	17.1733	31.5	20.3567	10.4933	47.6167	25.7567	40.5767	18.57	10.4533	XP_024455309.1(LOW QUALITY PROTEIN: uncharacterized protein LOC112327266 [Populus trichocarpa])	GO:0003964(molecular_function:RNA-directed DNA polymerase activity); GO:0015074(biological_process:DNA integration); GO:0008270(molecular_function:zinc ion binding); GO:0003676(molecular_function:nucleic acid binding)				COG2801(T:Signal transduction mechanisms)	COG2801(serine threonine-protein kinase)	PF00078.27(RVT_1:Reverse transcriptase (RNA-dependent DNA polymerase))	sp|P04323|POL3_DROME(Retrovirus-related Pol polyprotein from transposon 17.6 OS=Drosophila melanogaster OX=7227 GN=pol PE=4 SV=1)
MSTRG.20267			293	0	0	0	0	0	0	0	0	0	0	0	0	0	3	0	1	2	0	0	0	1	0	0	0	0	0	0	0	0	0	0	1	0.3333	1	0	0
MSTRG.20312			354	7	9	3	3	2	2	1	5	7	7	1	14	9	9	10	6	12	7	4	6	14	9	11	7	11	7	5	5.3333	6	7.3333	1.6667	9.3333	6.3333	12.3333	6.6667	7.6667	TKR99104.1(hypothetical protein D5086_0000194930 [Populus alba])	GO:0016021(cellular_component:integral component of membrane)				ENOG41115IP(S:Function unknown)	ENOG41115IP(Protein of unknown function (DUF1218))
MSTRG.20319			257	7.94	0	9.26	0	5.48	4.85	4.05	4.05	5.57	0	0	0	1.8	5.86	2.02	3.79	1.92	2.03	0	8.17	3.6	0	1.97	0	1.98	3.48	0	6.33	1.6167	1.35	4.4367	3.2267	3.9867	2.5	0.6567	1.8367	XP_024437154.1(uncharacterized protein LOC112323384 [Populus trichocarpa])					ENOG4111SPB(S:Function unknown)	ENOG4111SPB(transposon protein)
MSTRG.20329			330	3.93	0.99	1.88	2	3	1.02	1	0	0	2	1.99	0	0	0	1.73	1.85	1.71	1.8	0	0.99	2	1.62	0.98	0.61	0	0.84	0	2.31	1.3367	0.6667	1.6233	0.5767	1.15	1.2367	0.3267	1.42	XP_011001948.1(PREDICTED: uncharacterized protein LOC105109054 [Populus euphratica])	GO:0004386(molecular_function:helicase activity)				ENOG410YPC1(S:Function unknown)	ENOG410YPC1(-)
MSTRG.2033			254	5	3	2	0	6	3	0	0	5	3	3	0	2	3	3	10	1	4	0	5	1	0	0	4	5	2	0	5.3333	3	0	1.6667	2.6667	6.3333	2.3333	0	2
MSTRG.2034			689	22	7	10	0	17	12	3	0	15	6	17	0	4	17	12	10	9	4	0	24	8	4	0	29	12	16	0	18	8.3333	0	10	11	21	9.6667	0	8
MSTRG.20366			520	12	4	11	2	11	9	7	0	6	3	13	3	4	14	3	10	10	8	5	10	4	7	0	21	6	9	0	9.6667	5.3333	1.6667	10.3333	7	13.6667	6.6667	1.6667	8	TKR99163.1(hypothetical protein D5086_0000195520 [Populus alba])
MSTRG.20367			431	4.16	1	1.01	4.12	1.97	2.98	1.15	5.53	3.24	2.06	5.28	6.56	4.18	2.02	5.02	1.03	0	1.07	6.31	0	4.74	4.1	3.93	5.04	0	1.01	1.17	3.1233	2.0133	5.4033	2.48	3.74	2.0233	1.58	3.8033	2.06
MSTRG.20368			354	31.95	24.64	27.26	30.95	25.88	27.56	18.67	26.62	29.05	34.36	24.22	40.94	21.59	29.58	30.91	26.93	21.19	24.71	30.53	27.09	26.66	23.76	38.49	32.83	28.84	31.05	23.9	28.96	28.8533	32.8367	23.3833	27.36	28.95	25.5633	30.9733	26.5067	XP_011020791.1(PREDICTED: uncharacterized protein LOC105123035 isoform X1 [Populus euphratica])					ENOG410YEW3(S:Function unknown)	ENOG410YEW3(Protein of unknown function (DUF1664))
MSTRG.20381			2490	41.63	33.15	25.93	38.37	28.07	29.48	41.11	43.43	37.44	22.77	32.33	34.51	50.42	58.01	41.1	58.91	60.3	50.94	28.02	72.27	52.18	39.85	30.92	78.43	43.54	47.83	32.03	35.7133	28.4667	38.77	33.1233	49.8433	69.87	52.0067	30.3233	46.2067	XP_024437154.1(uncharacterized protein LOC112323384 [Populus trichocarpa])					ENOG4111SPB(S:Function unknown); ENOG4111XVU(S:Function unknown)	ENOG4111SPB(transposon protein); ENOG4111XVU(-)	PF04937.15(DUF659:Protein of unknown function (DUF 659)); PF05699.14(Dimer_Tnp_hAT:hAT family C-terminal dimerisation region); PF02892.15(zf-BED:BED zinc finger)
MSTRG.2043			204	0	0	0	0	0	0	0	0	2	0	0	0	0	0	0	1	0	0	0	0	0	0	0	0	0	0	0	0.6667	0	0	0	0	0.3333	0	0	0
MSTRG.20476			742	0	0	0	0	0	0	0	0	0	0	0	0	0	0	0	0	0	0	0	0	0	0	0	0	0	0	0	0	0	0	0	0	0	0	0	0	XP_006378832.2(fasciclin-like arabinogalactan protein 17 [Populus trichocarpa] )	GO:0009733(biological_process:response to auxin); GO:0009735(biological_process:response to cytokinin); GO:0009739(biological_process:response to gibberellin); GO:0090376(biological_process:seed trichome differentiation); GO:0007155(biological_process:cell adhesion); GO:0016021(cellular_component:integral component of membrane)				COG2335(M:Cell wall/membrane/envelope biogenesis)	COG2335(Beta-Ig-H3 fasciclin)	PF02469.22(Fasciclin:Fasciclin domain)	sp|Q66GR0|FLA17_ARATH(Fasciclin-like arabinogalactan protein 17 OS=Arabidopsis thaliana OX=3702 GN=FLA17 PE=2 SV=1)
MSTRG.20487			357	0	3.67	0	89.07	1.01	0.29	0.61	53.55	0	0	1.99	80.71	0	2.86	3.1	0	0.82	0	63.4	0	0	0	88.19	1.32	4	0	77.37	0.3367	1.32	74.4433	0.8667	1.9867	0.44	1.6067	76.32	0	XP_024445362.1(uncharacterized protein LOC112324933 [Populus trichocarpa])	GO:0000943(cellular_component:retrotransposon nucleocapsid); GO:0016021(cellular_component:integral component of membrane); GO:0003887(molecular_function:DNA-directed DNA polymerase activity); GO:0015074(biological_process:DNA integration); GO:0008270(molecular_function:zinc ion binding); GO:0003676(molecular_function:nucleic acid binding); GO:0055085(biological_process:transmembrane transport)				COG2801(T:Signal transduction mechanisms); ENOG410XS4D(T:Signal transduction mechanisms)	COG2801(Serine Threonine protein kinase); ENOG410XS4D(Serine Threonine protein kinase)	PF13976.6(gag_pre-integrs:GAG-pre-integrase domain)
MSTRG.20488			757	9	4	5	66.62	4	9	4	51.12	5	2	7	62.3	8	4	4.45	2	13	7	57.14	5	11	4	44.54	4	7	5	44.51	6	5	60.0133	5.3333	5.4833	3.6667	10.3333	48.73	5.3333	ABF81447.1(NBS type disease resistance protein [Populus trichocarpa])	GO:0043531(molecular_function:ADP binding); GO:0000943(cellular_component:retrotransposon nucleocapsid); GO:0016301(molecular_function:kinase activity); GO:0015074(biological_process:DNA integration); GO:0008270(molecular_function:zinc ion binding); GO:0003676(molecular_function:nucleic acid binding); GO:0003964(molecular_function:RNA-directed DNA polymerase activity)	K03006	RPB1, POLR2A	map00240(Pyrimidine metabolism); map03020(RNA polymerase); map00230(Purine metabolism)	COG2801(L:Replication, recombination and repair)	COG2801(Retrotransposon protein)	PF07727.14(RVT_2:Reverse transcriptase (RNA-dependent DNA polymerase))	sp|P10978|POLX_TOBAC(Retrovirus-related Pol polyprotein from transposon TNT 1-94 OS=Nicotiana tabacum OX=4097 PE=2 SV=1)
MSTRG.20489			201	0	0	0	2.97	0	0	0	2.26	0	0	0	1.22	0	0	0	0	0.07	0	0	0	1.83	0	1.53	0	0	0	0	0	0	2.15	0	0	0	0.6333	0.51	0	AIC77183.1(polyprotein [Gossypium barbadense])	GO:0004356(molecular_function:glutamate-ammonia ligase activity); GO:0004491(molecular_function:methylmalonate-semialdehyde dehydrogenase (acylating) activity); GO:0000943(cellular_component:retrotransposon nucleocapsid); GO:0016021(cellular_component:integral component of membrane); GO:0015074(biological_process:DNA integration); GO:0008270(molecular_function:zinc ion binding); GO:0003676(molecu…				ENOG410XS4D(S:Function unknown); COG2801(S:Function unknown)	ENOG410XS4D(Retrotransposon protein); COG2801(Retrotransposon protein)		sp|P10978|POLX_TOBAC(Retrovirus-related Pol polyprotein from transposon TNT 1-94 OS=Nicotiana tabacum OX=4097 PE=2 SV=1)
MSTRG.20490			288	0	0	0	0	0	1	0	0	0	0	0	0	0	0	0	3	2	0	0	1	0	2	0	0	0	0	0	0	0.3333	0	0	0	1.3333	0.6667	0	0.6667	PNT36450.1(hypothetical protein POPTR_005G127400 [Populus trichocarpa])
MSTRG.20491			230	1	2.38	0	1.08	2.07	3.03	0	0	4.11	3	0	0	4	7	3	1	2	1	1.62	3	1	1.06	1	1	3.8	0	2.79	2.3933	2.8033	0.36	0	4.6667	1.6667	2.2667	1.8033	0.6867	PNT52937.1(hypothetical protein POPTR_001G059600 [Populus trichocarpa] )
MSTRG.20494			249	0	0	0	0	0	1	1	0	0	1	0	0	0	0	0	1	0	1	1	0	0	1	0	0	0	0	2	0	0.6667	0	0.3333	0	0.3333	0	1	0.6667	XP_016649007.1(PREDICTED: uncharacterized mitochondrial protein AtMg00810-like [Prunus mume])	GO:0003964(molecular_function:RNA-directed DNA polymerase activity); GO:0000943(cellular_component:retrotransposon nucleocapsid); GO:0008270(molecular_function:zinc ion binding); GO:0003676(molecular_function:nucleic acid binding); GO:0015074(biological_process:DNA integration)						PF07727.14(RVT_2:Reverse transcriptase (RNA-dependent DNA polymerase))	sp|Q9ZT94|POLR2_ARATH(Retrovirus-related Pol polyprotein from transposon RE2 OS=Arabidopsis thaliana OX=3702 GN=RE2 PE=4 SV=1)
MSTRG.20507			918	6.18	6.22	3.68	0	7.1	8.92	1.25	6.93	1.47	8.49	0	12.25	3.53	10.98	3.57	2.09	1.29	1.37	3.02	1.16	8.52	3.53	6.62	1.33	2.73	0	2.34	4.9167	7.8767	6.3933	1.6433	6.0267	1.5267	4.18	3.9933	1.6333	YP_001109551.1(hypothetical protein Poptr_cp073 [Populus trichocarpa] )	GO:0009570(cellular_component:chloroplast stroma); GO:0016021(cellular_component:integral component of membrane); GO:0009536(cellular_component:plastid); GO:0005524(molecular_function:ATP binding); GO:0009507(cellular_component:chloroplast)				ENOG410Z49J(S:Function unknown); ENOG410YES0(S:Function unknown)	ENOG410Z49J(-); ENOG410YES0(function. Its presence in a non-photosynthetic plant (Epifagus virginiana) and experiments in tobacco indicate that it has an essential function which is probably not related to photosynthesis)	PF05695.12(DUF825:Plant protein of unknown function (DUF825))	sp|Q14F97|YCF2_POPAL(Protein Ycf2 OS=Populus alba OX=43335 GN=ycf2-A PE=3 SV=1)
MSTRG.20509			2951	19503.2	20269.6	3233.72	1302.44	13874.4	21389.5	2325.88	2587.38	27211.2	19719.7	5215.93	1249.85	26392.5	32511.8	36516.4	19234.6	21950.2	3318	1722.9	10967.1	17810	3258.87	2576.25	9612.46	22354.2	3988.48	1138.01	20196.2	20459.6	1713.22	3591.84	31806.9	13271.4	20704.8	1812.39	3521.78	QCD96519.1(hypothetical protein DEO72_LG6g1223 [Vigna unguiculata])	GO:0009570(cellular_component:chloroplast stroma); GO:0016021(cellular_component:integral component of membrane); GO:0005524(molecular_function:ATP binding); GO:0009507(cellular_component:chloroplast)				COG0048(J:Translation, ribosomal structure and biogenesis); ENOG410YXZV(S:Function unknown); ENOG410YES0(S:Function unknown)	COG0048(Interacts with and stabilizes bases of the 16S rRNA that are involved in tRNA selection in the A site and with the mRNA backbone. Located at the interface of the 30S and 50S subunits, it traverses the body of the 30S subunit contacting proteins on the other side and probably holding the rRNA structure together. The combined cluster of proteins S8, S12 and S17 appears to hold together the …		sp|Q68RU4|YCF2_PANGI(Protein Ycf2 OS=Panax ginseng OX=4054 GN=ycf2-A PE=3 SV=1)
MSTRG.20514			394	0	1	3	5	2	0	3	0	3	0	1	1	0	0	0	0	1	1	1	1	0	1	0	0	1	1	0	1.6667	0.3333	2	2.3333	0	0.3333	0.6667	0.3333	1
MSTRG.20522			439	1.64	0	0.97	5.84	4.31	2.41	1.7	0	0	0	4.08	0	1	1.04	2.35	0	0	3.91	1.1	0	0	0.18	1.99	2	0.94	3.03	2.85	1.9833	0.8033	1.9467	2.25	1.4633	0.6667	0.3133	1.98	2.3733	RQO93780.1(hypothetical protein POPTR_T037433 [Populus trichocarpa])	GO:0007165(biological_process:signal transduction); GO:0043531(molecular_function:ADP binding)				ENOG410ZU4Z(S:Function unknown); ENOG4112BMQ(S:Function unknown)	ENOG410ZU4Z(Resistance protein); ENOG4112BMQ(TMV resistance protein N-like)	PF00931.22(NB-ARC:NB-ARC domain); PF13191.6(AAA_16:AAA ATPase domain); PF01637.18(ATPase_2:ATPase domain predominantly from Archaea); PF00004.29(AAA:ATPase family associated with various cellular activities (AAA)); PF13173.6(AAA_14:AAA domain); PF13401.6(AAA_22:AAA domain)	sp|Q40392|TMVRN_NICGU(TMV resistance protein N OS=Nicotiana glutinosa OX=35889 GN=N PE=1 SV=1)
MSTRG.20551			334	1	0	0	0	0	0	0	0	0	0	0	0	0	1	0	0	0	0	0	1	3	0	0	0	6	0	0	0.3333	0	0	0	0.3333	0.3333	3	0	0
MSTRG.20559			242	0	0	0	0	0	0	0	0	0	0	0	0	0	0	0	0	0	0	0	0	0	0	0	0	0	0	0	0	0	0	0	0	0	0	0	0	PNT12388.1(hypothetical protein POPTR_011G081800 [Populus trichocarpa])	GO:0006355(biological_process:regulation of transcription, DNA-templated); GO:0007165(biological_process:signal transduction); GO:0043531(molecular_function:ADP binding); GO:0003677(molecular_function:DNA binding)				ENOG41116Z1(S:Function unknown); ENOG4111K5V(S:Function unknown); ENOG410Y65V(S:Function unknown); ENOG410YADE(S:Function unknown)	ENOG41116Z1(-); ENOG4111K5V(Reverse transcriptase (RNA-dependent DNA polymerase)); ENOG410Y65V(Retrotransposon protein); ENOG410YADE(Reverse transcriptase (RNA-dependent DNA polymerase))	PF14111.6(DUF4283:Domain of unknown function (DUF4283))
MSTRG.20573			230	0	0	0	0	1	1	0	0	1	0	0	2	1	3	0	2	4	0	1	1	3	0	1	1	2	0	0	0.6667	0.3333	0.6667	0	1.3333	1.3333	3	0.6667	0	ABG37667.2(transposase tnp2, partial [Populus trichocarpa])	GO:0015074(biological_process:DNA integration); GO:0003676(molecular_function:nucleic acid binding)						PF13960.6(DUF4218:Domain of unknown function (DUF4218))
MSTRG.20577			240	0	0	0	0	0	0	0	0	1	0	1	0	0	4	3	0	0	1	1	1	0	0	0	0	0	0	0	0.3333	0	0	0.3333	2.3333	0.3333	0	0.3333	0.3333	XP_011024469.1(PREDICTED: histone-lysine N-methyltransferase SUVR2 isoform X1 [Populus euphratica])	GO:0018024(molecular_function:histone-lysine N-methyltransferase activity); GO:0005634(cellular_component:nucleus); GO:0005694(cellular_component:chromosome); GO:0008270(molecular_function:zinc ion binding)				COG2940(S:Function unknown)	COG2940(Histone-lysine N-methyltransferase)		sp|Q946J2|SUVR1_ARATH(Probable inactive histone-lysine N-methyltransferase SUVR1 OS=Arabidopsis thaliana OX=3702 GN=SUVR1 PE=1 SV=2)
MSTRG.20581			308	45.1	31.65	31.62	64.98	37.93	35.6	35.74	32.81	24.18	28.53	27.12	39.06	70.48	61.5	66.08	20.61	17.27	27.13	33.69	44.59	42.42	62.8	60.93	17.32	49.21	25.18	13.53	35.7367	31.9267	45.6167	31.4933	66.02	27.5067	36.3	36.05	38.37	PNT43355.1(hypothetical protein POPTR_003G029800 [Populus trichocarpa])	GO:0016021(cellular_component:integral component of membrane)
MSTRG.20582			611	13.74	6.77	19.89	18.68	15.95	9	22.59	14.94	10.33	19.96	26.08	21.28	33.79	31.54	24.29	17.23	35.27	26.51	17.09	21.98	13.61	27.03	34.95	34.67	26.94	22.46	10	13.34	11.91	18.3	22.8533	29.8733	24.6267	25.2733	20.68	25.3333	RQO90598.1(hypothetical protein POPTR_005G154101 [Populus trichocarpa])
MSTRG.20583			458	0	0	0	0	0	0	0	0	0	0	0	0	0	0	0	0	0	0	0	0	0	0	0	0	0	0	0	0	0	0	0	0	0	0	0	0	PNT43355.1(hypothetical protein POPTR_003G029800 [Populus trichocarpa])	GO:0016021(cellular_component:integral component of membrane)
MSTRG.20584			202	0	0	0	0	0	0	0	0	0	0	0	0	0	0	0	0	0	0	0	0	0	0	0	0	0	0	0	0	0	0	0	0	0	0	0	0	XP_011013479.1(PREDICTED: LOW QUALITY PROTEIN: uncharacterized protein LOC105117497, partial [Populus euphratica])	GO:0010581(biological_process:regulation of starch biosynthetic process); GO:0015074(biological_process:DNA integration); GO:0008270(molecular_function:zinc ion binding); GO:0003676(molecular_function:nucleic acid binding); GO:0019252(biological_process:starch biosynthetic process); GO:0009507(cellular_component:chloroplast)
MSTRG.20590			281	0.76	0	0	0	1	0	0	0	0	0	0	1	1.44	0	0	0	0	0	0.06	1	0	0	1	0	0	0	0	0.5867	0	0.3333	0	0.48	0.3333	0	0.3533	0
MSTRG.20591			304	0	0	0	3.89	0	0	0	0	0	0.96	1.07	0	0	0	0	0	0	0	0.83	0	0	0	2.74	0	0	0	0	0	0.32	1.2967	0.3567	0	0	0	1.19	0	PNT05632.1(hypothetical protein POPTR_014G183300 [Populus trichocarpa])	GO:0016021(cellular_component:integral component of membrane)
MSTRG.20592			211	0	0	0	0	1	1	0	0	0	0	0	1	5	0	0	1	3	3	0	0	0	0	0	1	0	0	0	0.3333	0.3333	0.3333	0	1.6667	0.6667	1	0	1
MSTRG.20594			237	2	0	0	0	0	4	0	0	0	0	0	0	0	0	1	0	1	0	0	0	1	0	0	0	0	0	0	0.6667	1.3333	0	0	0.3333	0	0.6667	0	0	XP_024446987.1(uncharacterized protein LOC112325251 [Populus trichocarpa])					ENOG4111SPB(S:Function unknown); ENOG410Y65V(S:Function unknown); COG0534(V:Defense mechanisms)	ENOG4111SPB(transposon protein); ENOG410Y65V(Retrotransposon protein); COG0534(Mate efflux family protein)
MSTRG.20620			251	0	1	1	0	0	2	0	0	1	0	0	0	0	1	0	1	0	0	1	0	2	1	1	0	0	0	0	0.3333	1	0	0.3333	0.3333	0.3333	0.6667	0.6667	0.3333	XP_011012395.1(PREDICTED: uncharacterized protein LOC105116651 [Populus euphratica])	GO:0046983(molecular_function:protein dimerization activity); GO:0003677(molecular_function:DNA binding)				ENOG410XWK2(S:Function unknown); ENOG410YEJC(S:Function unknown)	ENOG410XWK2(transposon protein); ENOG410YEJC(transposon protein)
MSTRG.20622			216	0	0	0	1	1	1	0	0	1	0	1	1	1	1	0	0	1	0	1	0	0	2	0	0	0	1	0	0.6667	0.3333	0.6667	0.3333	0.6667	0	0.3333	0.3333	1	TKR91555.1(hypothetical protein D5086_0000222470 [Populus alba])	GO:0006355(biological_process:regulation of transcription, DNA-templated); GO:0005634(cellular_component:nucleus); GO:0009734(biological_process:auxin-activated signaling pathway); GO:0016740(molecular_function:transferase activity); GO:0003677(molecular_function:DNA binding)
MSTRG.20623			255	1	0	3	0	0	0	0	0	0	1	2	1	2	0	0	0	1	3	1	2	1	1	0	3	1	2	1	0.3333	0.3333	0.3333	1.6667	0.6667	1.6667	1	0.6667	2	PNT12561.1(hypothetical protein POPTR_011G092000, partial [Populus trichocarpa])	GO:0016740(molecular_function:transferase activity)				ENOG410YBPI(S:Function unknown)	ENOG410YBPI(Remorin family)
MSTRG.20653			1877	52	34	64	106	26	44	56	86	53	41	72	102	60	60	58	60	75	90	103	55	75	96	116	67	67	63	70	43.6667	39.6667	98	64	59.3333	60.6667	72.3333	96.3333	83	PNT12628.1(hypothetical protein POPTR_011G096200 [Populus trichocarpa])	GO:0005776(cellular_component:autophagosome); GO:0061908(deleted:old GO)				ENOG41114JT(S:Function unknown)	ENOG41114JT(-)
MSTRG.20659			516	54.75	56.93	110.35	89.41	52.96	48.92	74.92	75.79	57.79	48.7	87.42	62.77	32.32	56.07	40.61	63.95	54.62	72.71	85.24	51	38.29	91.05	79.97	77.35	47.09	75.79	70.61	55.1667	51.5167	75.99	90.8967	43	64.1	46.6667	78.6067	79.85	PNT12644.1(hypothetical protein POPTR_011G097200 [Populus trichocarpa])	GO:0016021(cellular_component:integral component of membrane)
MSTRG.20695			218	6.88	11.23	0	7.98	11.82	0	0	29.9	5.66	5.3	2.51	11.28	0	16.26	5.81	2.55	2.4	9.46	0	2.24	3.71	2.48	17.16	3.32	2.52	12.48	1.86	8.12	5.51	16.3867	0.8367	7.3567	2.7033	2.8767	6.34	8.14	PHT96196.1(hypothetical protein BC332_34878 [Capsicum chinense])					ENOG410Z05T(S:Function unknown); ENOG410Y21X(S:Function unknown); ENOG4111JHC(S:Function unknown); ENOG41119X7(S:Function unknown)	ENOG410Z05T(-); ENOG410Y21X(-); ENOG4111JHC(senescence-associated protein); ENOG41119X7(-)
MSTRG.2072			204	87.83	16.98	0	0	40.21	3.86	0	0	165.45	7	1.99	0	10	9.65	5.03	87.47	16.98	1	0	88.75	1	5	0	115.67	3.96	34.69	0	97.83	9.28	0	0.6633	8.2267	97.2967	7.3133	0	13.5633
MSTRG.20721			606	23	28	12	0	34	18	10	0	25	18	12	0	8	9	9	18	10	8	0	20	3	7	0	12	16	19	0	27.3333	21.3333	0	11.3333	8.6667	16.6667	9.6667	0	11.3333						ENOG4111GRP(S:Function unknown)	ENOG4111GRP(Berardinelli-Seip congenital lipodystrophy 2 (seipin))
MSTRG.2073			203	26	5.81	0	0	13.63	6	1	0	55.99	0	1.97	0	2.94	14.87	0.92	51.4	5.86	1.98	0	45.92	0.98	2.96	0	56.84	2.88	17.71	0	31.8733	3.9367	0	0.99	6.2433	51.3867	3.24	0	7.55	PNT56708.1(hypothetical protein POPTR_001G260200 [Populus trichocarpa])
MSTRG.2075			254	0	0	0	1.24	0	0	0	4.57	0	0	0	1.18	0	0	0	0	0	0	1.21	0	0	0	0	0	0	0	1.94	0	0	2.33	0	0	0	0	1.05	0	PNT56707.1(hypothetical protein POPTR_001G260100 [Populus trichocarpa])	GO:0016021(cellular_component:integral component of membrane); GO:0102966(deleted:old GO); GO:0016746(molecular_function:transferase activity, transferring acyl groups); GO:0008374(molecular_function:O-acyltransferase activity); GO:0047196(molecular_function:long-chain-alcohol O-fatty-acyltransferase activity); GO:0103095(molecular_function:wax ester synthase activity)				ENOG41126FI(S:Function unknown)	ENOG41126FI(-)		sp|Q9SV07|ASAT1_ARATH(Acyl-CoA--sterol O-acyltransferase 1 OS=Arabidopsis thaliana OX=3702 GN=ASAT1 PE=1 SV=1)
MSTRG.20778			228	5	5.38	6	1	4	9	0	1	7	2	0	1	5.7	4.78	4	8	6	3	0	6.85	6	4.88	1	6	6	0	0	5.3333	5.46	1	2	4.8267	6.95	6	0.3333	2.6267	EFH64640.1(expressed protein [Arabidopsis lyrata subsp. lyrata])
MSTRG.20792			1701	755	589	164	159	429	531	114	142	368	467	137	140	464	259	414	502	420	123	144	273	336	115	122	338	486	104	89	517.333	529	147	138.333	379	371	414	118.333	114	XP_002317481.1(probable aminotransferase TAT2 isoform X2 [Populus trichocarpa] )	GO:0008696(molecular_function:4-amino-4-deoxychorismate lyase activity); GO:0006520(biological_process:cellular amino acid metabolic process); GO:0008483(molecular_function:transaminase activity); GO:0009058(biological_process:biosynthetic process); GO:0004838(molecular_function:L-tyrosine:2-oxoglutarate aminotransferase activity); GO:0030170(molecular_function:pyridoxal phosphate binding); GO:00…	K00815	TAT	map00270(Cysteine and methionine metabolism); map00130(Ubiquinone and other terpenoid-quinone biosynthesis); map00950(Isoquinoline alkaloid biosynthesis); map00360(Phenylalanine metabolism); map00350(Tyrosine metabolism); map00960(Tropane, piperidine and pyridine alkaloid biosynthesis); map00400(Phenylalanine, tyrosine and tryptophan biosynthesis)	COG0436(O:Posttranslational modification, protein turnover, chaperones)	COG0436()-reductase)	PF00155.21(Aminotran_1_2:Aminotransferase class I and II); PF01212.21(Beta_elim_lyase:Beta-eliminating lyase); PF00266.19(Aminotran_5:Aminotransferase class-V)	sp|Q9FN30|TAT2_ARATH(Probable aminotransferase TAT2 OS=Arabidopsis thaliana OX=3702 GN=At5g53970 PE=2 SV=1)
MSTRG.20793			242	0	0	0	0	0	0	0	0	0	0	0	0	0	0	2	0	1	0	0	0	0	0	0	0	1	0	0	0	0	0	0	0.6667	0	0.6667	0	0	XP_006377758.2(uncharacterized protein LOC18103370 [Populus trichocarpa])					ENOG4111SPB(S:Function unknown); ENOG410Y65V(S:Function unknown); COG0534(V:Defense mechanisms)	ENOG4111SPB(transposon protein); ENOG410Y65V(Retrotransposon protein); COG0534(Mate efflux family protein)
MSTRG.20844			207	1	1	5	8	1	3	7	19	1	4	7	14	1	2	0	2	5	10	16	0	1	0	18	0	8	2	19	1	2.6667	13.6667	6.3333	1	0.6667	4.6667	17.6667	4
MSTRG.20854			446	3	5	1	45	3	9	1	51	8	4	0	66	2	2	6	6	7	4	38	10	3	4	21	8	3	3	36	4.6667	6	54	0.6667	3.3333	8	4.3333	31.6667	3.6667	PSR95678.1(Protein anachronism like [Actinidia chinensis var. chinensis])	GO:0016021(cellular_component:integral component of membrane)
MSTRG.20856			3186	12	15	12	17	21	64	29	17	16	13	14	19	30	25	23	16	42	30	15	7	8	17	24	30	15	10	20	16.3333	30.6667	17.6667	18.3333	26	17.6667	21.6667	19.6667	19	OMO62984.1(Integrase, catalytic core [Corchorus capsularis])	GO:0009555(biological_process:pollen development); GO:0000943(cellular_component:retrotransposon nucleocapsid); GO:0016021(cellular_component:integral component of membrane); GO:0015074(biological_process:DNA integration); GO:0003676(molecular_function:nucleic acid binding); GO:0005886(cellular_component:plasma membrane); GO:0003964(molecular_function:RNA-directed DNA polymerase activity); GO:004…				COG2801(L:Replication, recombination and repair); ENOG410ZK3M(S:Function unknown); ENOG410XS4D(S:Function unknown)	COG2801(Retrotransposon protein); ENOG410ZK3M(-); ENOG410XS4D(Retrotransposon protein)	PF07727.14(RVT_2:Reverse transcriptase (RNA-dependent DNA polymerase)); PF00665.26(rve:Integrase core domain); PF13976.6(gag_pre-integrs:GAG-pre-integrase domain)	sp|Q94HW2|POLR1_ARATH(Retrovirus-related Pol polyprotein from transposon RE1 OS=Arabidopsis thaliana OX=3702 GN=RE1 PE=2 SV=1)
MSTRG.20881			1424	10	8	16	6	4	5	21	10	4	16	10	12	17	13	7	5	20	8	13	6	16	14	8	12	24	22	4	6	9.6667	9.3333	15.6667	12.3333	7.6667	20	8.3333	14.6667
MSTRG.20915			384	0	0	0	0	0	0	0	0	0	0	0	0	0	0	0	0	0	0	0	0	0	0	0	0	0	0	0	0	0	0	0	0	0	0	0	0	XP_024447894.1(G-type lectin S-receptor-like serine/threonine-protein kinase At4g27290 [Populus trichocarpa])	GO:0004674(molecular_function:protein serine/threonine kinase activity); GO:0016021(cellular_component:integral component of membrane); GO:0048544(biological_process:recognition of pollen); GO:0005524(molecular_function:ATP binding); GO:0004672(molecular_function:protein kinase activity)	K04733	IRAK4		COG0515(T:Signal transduction mechanisms)	COG0515(Serine Threonine protein kinase)	PF08276.11(PAN_2:PAN-like domain)	sp|O81832|Y4729_ARATH(G-type lectin S-receptor-like serine/threonine-protein kinase At4g27290 OS=Arabidopsis thaliana OX=3702 GN=At4g27290 PE=3 SV=4)
MSTRG.20925			481	7.65	4	12.32	21.18	5.99	4.03	7.52	7.68	16.08	15.96	12	9.02	2.99	7.96	4.05	16.97	6.83	14.35	12.79	5	8.99	9	10.15	17.19	12.93	6.99	12.71	9.9067	7.9967	12.6267	10.6133	5	13.0533	9.5833	11.8833	10.1133	XP_011014260.1(PREDICTED: uncharacterized protein LOC105118094 [Populus euphratica])					ENOG410YZWQ(T:Signal transduction mechanisms); ENOG410YXN0(S:Function unknown)	ENOG410YZWQ(Serine Threonine protein kinase); ENOG410YXN0(-)	PF12776.7(Myb_DNA-bind_3:Myb/SANT-like DNA-binding domain)	sp|Q9FFJ8|LIMYB_ARATH(L10-interacting MYB domain-containing protein OS=Arabidopsis thaliana OX=3702 GN=LIMYB PE=1 SV=1)
MSTRG.20930			1098	17	19	9	13	14	10	7	3	17	24	6	6	12	5	8	20	8	10	4	12	14	8	9	21	8	12	8	16	17.6667	7.3333	7.3333	8.3333	17.6667	10	7	10	XP_011032431.1(PREDICTED: ELMO domain-containing protein A-like isoform X2 [Populus euphratica])					ENOG410XRXC(S:Function unknown)	ENOG410XRXC(ELMO CED-12 domain containing)
MSTRG.20987			296	0	0	0	0	0	0	0	0	0	0	0	2	0	0	0	0	0	1	0	1	0	0	1	0	1	1	0	0	0	0.6667	0	0	0.3333	0.3333	0.3333	0.6667
MSTRG.21020			1091	55.09	46.39	28.97	5	62.03	29.9	37.49	2.86	47.15	36.63	24.98	5	37.2	54.79	45.44	53.25	50.36	20.01	8	47.44	33.96	27.27	7	65.4	41.4	43.32	1	54.7567	37.64	4.2867	30.48	45.81	55.3633	41.9067	5.3333	30.2	XP_018846510.1(PREDICTED: uncharacterized protein LOC109010208 [Juglans regia])	GO:0016021(cellular_component:integral component of membrane); GO:0008270(molecular_function:zinc ion binding); GO:0003676(molecular_function:nucleic acid binding)						PF14244.6(Retrotran_gag_3:gag-polypeptide of LTR copia-type); PF14223.6(Retrotran_gag_2:gag-polypeptide of LTR copia-type); PF03732.17(Retrotrans_gag:Retrotransposon gag protein)	sp|Q9ZT94|POLR2_ARATH(Retrovirus-related Pol polyprotein from transposon RE2 OS=Arabidopsis thaliana OX=3702 GN=RE2 PE=4 SV=1)
MSTRG.21025			1417	3	3	6	14	1	4	5	18	5	4	7	14	15	14	12	4	5	16	17	5	5	21	15	7	19	21	19	3	3.6667	15.3333	6	13.6667	5.3333	9.6667	17	19.3333	PNT13436.2(hypothetical protein POPTR_011G142600 [Populus trichocarpa])
MSTRG.21035			467	728	530	1127.25	1793.04	575.48	534	1104.08	2019.35	995.82	601.76	1441.53	1667.83	434	495	381.77	1158.72	664	1553.37	1718.53	941.29	552.77	1675	1619.27	1302	471.16	1520.76	1240	766.433	555.253	1826.74	1224.29	436.923	1134	562.643	1525.93	1583.04
MSTRG.21052			337	1	8	0	0	1	0	0	0	4	8	0	0	0	0	2	4	1	0	0	1	1	0	0	2	3	0	0	2	5.3333	0	0	0.6667	2.3333	1.6667	0	0
MSTRG.21070			984	8.15	17.44	31.93	26.42	10.36	20.48	47.48	21.02	11.55	20.97	54.89	34.61	11.39	15.13	19.49	19.72	24.77	98.08	69.39	9.51	33.79	109.77	121.82	14.51	39.09	115.49	76.91	10.02	19.63	27.35	44.7667	15.3367	14.58	32.55	89.3733	107.78	XP_011004369.1(PREDICTED: WAT1-related protein At5g07050-like isoform X2 [Populus euphratica])	GO:0022857(molecular_function:transmembrane transporter activity); GO:0016021(cellular_component:integral component of membrane); GO:0005886(cellular_component:plasma membrane)				ENOG410YBED(U:Intracellular trafficking, secretion, and vesicular transport)	ENOG410YBED(auxin-induced protein)		sp|Q9SUD5|WTR36_ARATH(WAT1-related protein At4g28040 OS=Arabidopsis thaliana OX=3702 GN=At4g28040 PE=2 SV=1)
MSTRG.211			387	5	0	1	0	0	0	0	1	3	0	0	0	1	1	1	7	3	0	0	3	1	0	0	4	0	0	1	2.6667	0	0.3333	0.3333	1	4.6667	1.3333	0.3333	0
MSTRG.2110			944	53	37	40	40	57	21	38	41	52	27	35	41	39	56	53	63	50	62	42	41	41	60	35	71	56	58	38	54	28.3333	40.6667	37.6667	49.3333	58.3333	49	38.3333	60	PNT56793.1(hypothetical protein POPTR_001G264700, partial [Populus trichocarpa])
MSTRG.21101			204	0	0	0	2	1	0	0	1	1	0	0	0	0	0	0	0	0	0	2	0	0	1	0	0	0	1	3	0.6667	0	1	0	0	0	0	1.6667	0.6667
MSTRG.21200			342	0	0	0	0	2.05	0	0	0	0	0	0	0	0	0	0	0	0	0	1.79	0	0	0	0	0	0	0	0	0.6833	0	0	0	0	0	0	0.5967	0	RQO98043.1(hypothetical protein POPTR_011G164250 [Populus trichocarpa] )	GO:0003824(molecular_function:catalytic activity)	K14760	AAE14	map00130(Ubiquinone and other terpenoid-quinone biosynthesis)	COG0318(I:Lipid transport and metabolism); COG0318(Q:Secondary metabolites biosynthesis, transport and catabolism)	COG0318(Amp-dependent synthetase and ligase); COG0318(Amp-dependent synthetase and ligase)	PF00501.28(AMP-binding:AMP-binding enzyme)	sp|Q8VYJ1|MENE_ARATH(2-succinylbenzoate--CoA ligase, chloroplastic/peroxisomal OS=Arabidopsis thaliana OX=3702 GN=AAE14 PE=1 SV=1)
MSTRG.21225			509	0	0	0	6	0	0	0	11	0	0	0	4	0	0	0	0	0	0	1	0	0	0	4	0	0	0	1	0	0	7	0	0	0	0	2	0	XP_024466919.1(DEAD-box ATP-dependent RNA helicase 13 [Populus trichocarpa] )		K14805	DDX24, MAK5		ENOG410XS03(L:Replication, recombination and repair)	ENOG410XS03(atp-dependent rna helicase)
MSTRG.21270			317	0	0	0	1	1	0	0	3	0	3	0	7	0	0	0	0	0	0	1	0	0	3	1	2	0	0	3	0.3333	1	3.6667	0	0	0.6667	0	1.6667	1	TKR89993.1(hypothetical protein D5086_0000237900 [Populus alba])
MSTRG.21293			324	8.56	3.66	0.17	8.27	3.69	12.94	5.57	5.02	5.98	0	0	3.79	9.99	16.31	15.95	4.23	4.83	0	1.98	11.62	11.65	1.66	4.76	2.81	10.38	2.12	8.01	6.0767	5.5333	5.6933	1.9133	14.0833	6.22	8.9533	4.9167	1.26	XP_024455309.1(LOW QUALITY PROTEIN: uncharacterized protein LOC112327266 [Populus trichocarpa])	GO:0003964(molecular_function:RNA-directed DNA polymerase activity); GO:0015074(biological_process:DNA integration); GO:0004190(molecular_function:aspartic-type endopeptidase activity); GO:0003676(molecular_function:nucleic acid binding)				COG2801(L:Replication, recombination and repair)	COG2801(Retrotransposon protein)	PF00078.27(RVT_1:Reverse transcriptase (RNA-dependent DNA polymerase))	sp|P31843|RRPO_OENBE(RNA-directed DNA polymerase homolog OS=Oenothera berteroana OX=3950 PE=4 SV=1)
MSTRG.21294			202	0	0	0.86	0	1.64	0.98	0	1.95	0	1.99	1.99	0	3.13	2.77	4.99	2.85	0	0	0	0	0	0	1	1.96	1.67	2	1	0.5467	0.99	0.65	0.95	3.63	1.6033	0.5567	0.6667	0.6667	ABG37663.1(CCHC-type integrase [Populus trichocarpa])	GO:0000943(cellular_component:retrotransposon nucleocapsid); GO:0016021(cellular_component:integral component of membrane); GO:0015074(biological_process:DNA integration); GO:0008270(molecular_function:zinc ion binding); GO:0003676(molecular_function:nucleic acid binding); GO:0004672(molecular_function:protein kinase activity); GO:0005524(molecular_function:ATP binding)
MSTRG.21299			447	11.13	8.44	3.92	5.03	10.64	24.55	3.64	5.64	12.94	16.87	0	8.44	19.65	30.97	30.03	7.55	11.79	6.01	8.64	4.05	16.83	2.89	4.76	7.05	15.39	1.86	3.94	11.57	16.62	6.37	2.52	26.8833	6.2167	14.67	5.78	3.5867	RQO89780.1(hypothetical protein POPTR_004G232250 [Populus trichocarpa])	GO:0016021(cellular_component:integral component of membrane); GO:0015074(biological_process:DNA integration); GO:0008270(molecular_function:zinc ion binding); GO:0003676(molecular_function:nucleic acid binding); GO:0004672(molecular_function:protein kinase activity); GO:0005524(molecular_function:ATP binding)
MSTRG.21314			2554	164	69	138	174	142	100	131	144	176	100	169	121	115	127	128	133	144	160	151	127	84	168	190	148	127	170	138	160.667	89.6667	146.333	146	123.333	136	118.333	159.667	166	XP_024437731.1(uncharacterized protein LOC112323516 [Populus trichocarpa])	GO:0046983(molecular_function:protein dimerization activity); GO:0003677(molecular_function:DNA binding)				ENOG41122IK(S:Function unknown)	ENOG41122IK(Protein of unknown function (DUF 659))	PF04937.15(DUF659:Protein of unknown function (DUF 659)); PF05699.14(Dimer_Tnp_hAT:hAT family C-terminal dimerisation region); PF02892.15(zf-BED:BED zinc finger)
MSTRG.21319			494	7	2	3	3	1	4	5	1	6	0	1	4	7	3	3	2	5	6	3	1	3	9	1	6	4	14	2	4.6667	2	2.6667	3	4.3333	3	4	2	9.6667
MSTRG.21322			2605	78	63	171	157	95	34	136	136	80	55	142	165	58	60	53	77	44	134	160	60	46	106	159	104	31	134	168	84.3333	50.6667	152.667	149.667	57	80.3333	40.3333	162.333	124.667	XP_002318368.1(disease resistance protein RGA2 [Populus trichocarpa] )	GO:0043531(molecular_function:ADP binding)				COG4886(S:Function unknown)	COG4886(Protein of unknown function (DUF 659))	PF00931.22(NB-ARC:NB-ARC domain); PF18052.1(Rx_N:Rx N-terminal domain); PF13855.6(LRR_8:Leucine rich repeat); PF12799.7(LRR_4:Leucine Rich repeats (2 copies))	sp|Q7XA42|RGA1_SOLBU(Putative disease resistance protein RGA1 OS=Solanum bulbocastanum OX=147425 GN=RGA1 PE=2 SV=2)
MSTRG.21339			584	19	17	9	9	9	10	7	12	15	10	8	6	7	19	14	10	26	5	10	15	16	16	5	13	20	9	4	14.3333	12.3333	9	8	13.3333	12.6667	20.6667	6.3333	10	PNT08668.1(hypothetical protein POPTR_012G001200 [Populus trichocarpa])
MSTRG.21340			810	53	35	22	10	16	22	20	18	26	37	21	24	21	36	40	34	29	23	20	32	35	29	12	58	45	29	18	31.6667	31.3333	17.3333	21	32.3333	41.3333	36.3333	16.6667	27
MSTRG.21361			250	0	0	0.97	0	0	0	0	0	0.15	0	0	0	0	1.65	0	0	0	0.91	0	2.32	0	0	0	1.37	0	0	0	0.05	0	0	0.3233	0.55	1.23	0	0	0.3033	PNT08850.1(hypothetical protein POPTR_012G011900 [Populus trichocarpa])	GO:0016021(cellular_component:integral component of membrane)				ENOG4111CHW(S:Function unknown); ENOG41119M2(S:Function unknown)	ENOG4111CHW(Plant protein of unknown function); ENOG41119M2(Plant protein of unknown function)	PF03140.15(DUF247:Plant protein of unknown function)
MSTRG.21386			413	10	0	8	9	4	3	14	8	3	2	11	3	5	9	4	1	0	20	6	5	7	16	9	8	4	18	6	5.6667	1.6667	6.6667	11	6	4.6667	3.6667	7	18	XP_011024837.1(PREDICTED: uncharacterized protein LOC105125881 isoform X1 [Populus euphratica])
MSTRG.21416			429	0	0	0	4	0	0	0	6	0	0	0	2	0	0	0	0	0	0	7	0	0	0	3	1	0	0	6	0	0	4	0	0	0.3333	0	5.3333	0	RQO98179.1(hypothetical protein POPTR_012G019933 [Populus trichocarpa])
MSTRG.21419			244	3	0	0	0	0	0	0	0	0	0	0	0	0	0	0	0	0	0	0	0	0	0	0	0	0	0	0	1	0	0	0	0	0	0	0	0
MSTRG.21422			386	2	2	0	0	0	1	0	0	1	0	0	2	1	1	2	0	0	1	0	2	0	0	0	2	0	0	0	1	1	0.6667	0	1.3333	1.3333	0	0	0.3333	PNS22742.1(hypothetical protein POPTR_T119000 [Populus trichocarpa])
MSTRG.21423			210	0	0	0	0	0	0	0	0	0	0	0	0	0	0	0	2	0	0	0	0	1	0	0	0	0	0	0	0	0	0	0	0	0.6667	0.3333	0	0
MSTRG.21424			363	7	3	3	2	1	8	3	1	6	7	1	3	4	6	13	7	8	2	1	7	7	10	1	6	5	5	2	4.6667	6	2	2.3333	7.6667	6.6667	6.6667	1.3333	5.6667
MSTRG.21428			222	0	0	0	0	1	1	1	0	1	0	0	0	2	1	1	2	3	0	1	2	2	1	1	0	1	0	1	0.6667	0.3333	0	0.3333	1.3333	1.3333	2	1	0.3333
MSTRG.21453			220	0	0	0	0	0	2	0	0	2	2	0	0	0	0	2	1	0	0	0	0	1	0	0	0	1	1	0	0.6667	1.3333	0	0	0.6667	0.3333	0.6667	0	0.3333
MSTRG.21486			869	36.49	29.04	21.64	33.86	29.08	60.18	24.43	37.89	31.03	67.88	15.48	37.04	77.4	67	99.36	35.01	42.11	9.14	38.04	23.94	60.78	21.19	38.61	47.4	94.37	10.9	12.99	32.2	52.3667	36.2633	20.5167	81.2533	35.45	65.7533	29.88	13.7433	XP_024455309.1(LOW QUALITY PROTEIN: uncharacterized protein LOC112327266 [Populus trichocarpa])	GO:0020037(molecular_function:heme binding); GO:0015074(biological_process:DNA integration); GO:0008270(molecular_function:zinc ion binding); GO:0003676(molecular_function:nucleic acid binding); GO:0046872(molecular_function:metal ion binding); GO:0009055(molecular_function:electron carrier activity)				COG2801(L:Replication, recombination and repair)	COG2801(Retrotransposon protein)	PF00078.27(RVT_1:Reverse transcriptase (RNA-dependent DNA polymerase))	sp|P04323|POL3_DROME(Retrovirus-related Pol polyprotein from transposon 17.6 OS=Drosophila melanogaster OX=7227 GN=pol PE=4 SV=1)
MSTRG.21552			212	0	0	0	0	0	0	1	0	1	0	0	1	0	0	0	0	0	3	0	0	0	0	0	0	1	0	0	0.3333	0	0.3333	0.3333	0	0	0.3333	0	1
MSTRG.21566			2606	50.86	36.55	29.17	3.98	49.77	44.38	35.56	3.66	49.8	41.75	24.41	12.7	47.51	46.18	36.69	46.5	86.4	21.7	7.21	26.1	42.09	18.66	11.72	33.13	51.75	9	3.87	50.1433	40.8933	6.78	29.7133	43.46	35.2433	60.08	7.6	16.4533	PRQ17740.1(putative RNA-directed DNA polymerase [Rosa chinensis])	GO:0003964(molecular_function:RNA-directed DNA polymerase activity); GO:0015074(biological_process:DNA integration); GO:0000943(cellular_component:retrotransposon nucleocapsid); GO:0008270(molecular_function:zinc ion binding); GO:0003676(molecular_function:nucleic acid binding)				ENOG410ZXEB(S:Function unknown); COG2801(L:Replication, recombination and repair)	ENOG410ZXEB(Integrase core domain); COG2801(Retrotransposon protein)	PF00665.26(rve:Integrase core domain); PF14223.6(Retrotran_gag_2:gag-polypeptide of LTR copia-type); PF13976.6(gag_pre-integrs:GAG-pre-integrase domain)	sp|P10978|POLX_TOBAC(Retrovirus-related Pol polyprotein from transposon TNT 1-94 OS=Nicotiana tabacum OX=4097 PE=2 SV=1)
MSTRG.21589			1662	79	65	99	78	78	81	68	61	97	77	93	96	68	85	70	98	128	97	80	105.93	64	74	92	91	96	83	72	84.6667	74.3333	78.3333	86.6667	74.3333	98.31	96	81.3333	84.6667	XP_011039159.1(PREDICTED: uncharacterized protein LOC105135806 isoform X1 [Populus euphratica])					ENOG411206Y(S:Function unknown)	ENOG411206Y(serine threonine kinase 11 interacting protein)	PF13359.6(DDE_Tnp_4:DDE superfamily endonuclease); PF04827.14(Plant_tran:Plant transposon protein)
MSTRG.21609			226	0	0	0	0	0	0	0	0	0	0	0	0	0	0	0	0	0	0	0	0	0	0	0	0	0	0	3	0	0	0	0	0	0	0	1	0	XP_002317879.1(putative disease resistance protein RGA3 [Populus trichocarpa] )	GO:0043531(molecular_function:ADP binding)				COG4886(S:Function unknown)	COG4886(Methyltransferase)	PF00931.22(NB-ARC:NB-ARC domain)
MSTRG.21632			216	0	0	0	0	0	0	0	1	0	0	0	0	0	0	0	0	1	0	0	0	0	1	1	0	0	0	1	0	0	0.3333	0	0	0	0.3333	0.6667	0.3333	PNT09571.1(hypothetical protein POPTR_012G051800 [Populus trichocarpa])
MSTRG.21636			721	27	24	3	2	22	19	1	1	21	34	12	2	42	46	29	27	34	6	2	36	24	6	2	36	57	5	0	23.3333	25.6667	1.6667	5.3333	39	33	38.3333	1.3333	5.6667
MSTRG.21638			479	9	3	5	2	9	2	13	6	9	3	4	4	8	1	6	4	8	16	6	4	6	6	0	7	8	2	5	9	2.6667	4	7.3333	5	5	7.3333	3.6667	8	XP_011037056.1(PREDICTED: uncharacterized protein LOC105134369 [Populus euphratica])					ENOG410Y65V(O:Posttranslational modification, protein turnover, chaperones)	ENOG410Y65V(Procollagen-lysine 2-oxoglutarate 5-dioxygenase)
MSTRG.21639			1712	17	10	30	11	24	12	37	14	31	10	23	14	13	27	14	20	17	24	22	24	9	18	18	29	13	25	7	24	10.6667	13	30	18	24.3333	13	15.6667	22.3333	XP_006376733.2(uncharacterized protein LOC18103702 [Populus trichocarpa] )					ENOG410Y65V(O:Posttranslational modification, protein turnover, chaperones); ENOG4111SG9(O:Posttranslational modification, protein turnover, chaperones); ENOG4111K5V(S:Function unknown)	ENOG410Y65V(Procollagen-lysine 2-oxoglutarate 5-dioxygenase); ENOG4111SG9(Procollagen-lysine 2-oxoglutarate 5-dioxygenase); ENOG4111K5V(Retrotransposon protein)	PF14111.6(DUF4283:Domain of unknown function (DUF4283)); PF14392.6(zf-CCHC_4:Zinc knuckle)
MSTRG.21646			254	1	0	1	2	1	3	1	0	0	0	0	0	2	0	0	2	1	1	1	1	0	1	3	1	0	1	1	0.6667	1	0.6667	0.6667	0.6667	1.3333	0.3333	1.6667	1
MSTRG.21677			1985	48	37	145	91	55	24	163	82	49	40	113	63	33	52	22	57	53	115	75	38	52	164	69	65	35	88	84	50.6667	33.6667	78.6667	140.333	35.6667	53.3333	46.6667	76	122.333	PNT09665.1(hypothetical protein POPTR_012G057900 [Populus trichocarpa])	GO:0016021(cellular_component:integral component of membrane)
MSTRG.21714			432	27.96	12.94	7.76	16.22	17.74	16.92	14.88	9.82	19.68	14.09	6.67	7.94	10.65	19.59	17.88	21.51	21.67	17.84	17.95	10.18	10.74	25.78	7.8	21.01	3	15.87	11.87	21.7933	14.65	11.3267	9.77	16.04	17.5667	11.8033	12.54	19.83	PNT09771.1(hypothetical protein POPTR_012G062900, partial [Populus trichocarpa])		K06877	K06877		COG1205(L:Replication, recombination and repair)	COG1205(DEAD DEAH box helicase)
MSTRG.21715			633	4.05	6.18	1.79	3.06	5.1	0	2	0	1.01	4.16	1.07	2.03	0	3.88	0.95	5.09	2.03	3.06	1.02	3.11	3.1	4.23	0.7	2	3.98	3.9	1.02	3.3867	3.4467	1.6967	1.62	1.61	3.4	3.0367	0.9133	3.73	RQO98386.1(hypothetical protein POPTR_012G063101 [Populus trichocarpa])	GO:0003676(molecular_function:nucleic acid binding); GO:0005524(molecular_function:ATP binding)	K06877	K06877		COG1205(L:Replication, recombination and repair)	COG1205(DEAD DEAH box helicase)	PF00271.31(Helicase_C:Helicase conserved C-terminal domain)	sp|O13983|HRQ1_SCHPO(ATP-dependent helicase hrq1 OS=Schizosaccharomyces pombe (strain 972 / ATCC 24843) OX=284812 GN=hrq1 PE=1 SV=4)
MSTRG.21718			290	3	0	0	1.98	2.98	1	3	4.64	3	1	1	1.99	0	5	0	0	2.5	0	1	1.48	0	1	0	2.95	4	0	2	2.9933	0.6667	2.87	1.3333	1.6667	1.4767	2.1667	1	0.3333	RQO91950.1(hypothetical protein POPTR_006G191700 [Populus trichocarpa])	GO:0016787(molecular_function:hydrolase activity); GO:0004177(molecular_function:aminopeptidase activity)	K07018	K07018		ENOG410XR92(S:Function unknown)	ENOG410XR92(X-Pro dipeptidyl-peptidase (S15 family))
MSTRG.21722			352	5	1	2	2	3.1	2	2.99	3.01	4	0	5.07	3	2.01	2	1	2	1	4	2.99	6.34	1	4	4	1.07	3.99	3	2	4.0333	1	2.67	3.3533	1.67	3.1367	1.9967	2.9967	3.6667	PKI47632.1(hypothetical protein CRG98_031983 [Punica granatum])	GO:0015074(biological_process:DNA integration); GO:0003676(molecular_function:nucleic acid binding)				COG2801(L:Replication, recombination and repair); COG4677(L:Replication, recombination and repair)	COG2801(DEAD DEAH box helicase); COG4677(DEAD DEAH box helicase)
MSTRG.21726			314	0	0	0	0	0	0	1	0	0	0	1	0	0	1	1	0	0	1	0	0	0	2	0	0	0	5	0	0	0	0	0.6667	0.6667	0	0	0	2.6667	PNX81877.1(hypothetical protein L195_g037902, partial [Trifolium pratense])	GO:0000943(cellular_component:retrotransposon nucleocapsid); GO:0015074(biological_process:DNA integration); GO:0008270(molecular_function:zinc ion binding); GO:0003676(molecular_function:nucleic acid binding)	K03006	RPB1, POLR2A	map00240(Pyrimidine metabolism); map03020(RNA polymerase); map00230(Purine metabolism)	COG2801(L:Replication, recombination and repair); ENOG410XS4D(S:Function unknown)	COG2801(Retrotransposon protein); ENOG410XS4D(Retrotransposon protein)	PF07727.14(RVT_2:Reverse transcriptase (RNA-dependent DNA polymerase))	sp|P10978|POLX_TOBAC(Retrovirus-related Pol polyprotein from transposon TNT 1-94 OS=Nicotiana tabacum OX=4097 PE=2 SV=1)
MSTRG.21784			211	1	0	0	0	0	0	1	0	1	0	0	0	4	1	3	1	1	1	1	1	2	0	1	4	5	0	0	0.6667	0	0	0.3333	2.6667	2	2.6667	0.6667	0.3333	XP_024446160.1(uncharacterized protein LOC18107638 [Populus trichocarpa])	GO:0046983(molecular_function:protein dimerization activity); GO:0003677(molecular_function:DNA binding)				ENOG410XWK2(S:Function unknown)	ENOG410XWK2(transposon protein)
MSTRG.21815			1262	107.89	86	574	497	102	118	578.74	516.83	103.92	81	518.73	534	74	114	67	60	130.65	708	429	134	183.74	754.72	432	207	88	660.51	368	104.603	95	515.943	557.157	85	133.667	134.13	409.667	707.743
MSTRG.21884			258	2	0	0	1	1	2.61	1	0	0	0	0	1	2	3	3	0.98	1.97	0	2	1	1	0	1	1	7.99	0	0	1	0.87	0.6667	0.3333	2.6667	0.9933	3.6533	1	0
MSTRG.21898			273	5	0	2	0	1	0	1	0	8	0	7	0	0	0	2	1	0	7	0	2	0	6	0	0	0	4	0	4.6667	0	0	3.3333	0.6667	1	0	0	5.6667
MSTRG.21913			350	0	0	0	4	0	0	0	3	0	0	0	0	0	1	0	0	0	0	2	0	0	0	2	0	0	0	1	0	0	2.3333	0	0.3333	0	0	1.6667	0
MSTRG.21925			681	5	3	3	3	3	4	6	5	7	3	6	5	2	9	6	4	7	11	4	7	5	4	6	6	7	10	0	5	3.3333	4.3333	5	5.6667	5.6667	6.3333	3.3333	8.3333
MSTRG.21941			264	3	1	0	2	0	0	2	0	1	3	0	0	5	2	3	1	1	1	2	1	0	0	3	1	0	0	1	1.3333	1.3333	0.6667	0.6667	3.3333	1	0.3333	2	0.3333	CAN76397.1(hypothetical protein VITISV_001411 [Vitis vinifera] )	GO:0000943(cellular_component:retrotransposon nucleocapsid); GO:0015074(biological_process:DNA integration); GO:0004523(molecular_function:RNA-DNA hybrid ribonuclease activity); GO:0003676(molecular_function:nucleic acid binding); GO:0008270(molecular_function:zinc ion binding)				ENOG410XS4D(S:Function unknown); COG2801(L:Replication, recombination and repair); ENOG4111WQF(S:Function unknown)	ENOG410XS4D(Retrotransposon protein); COG2801(Retrotransposon protein); ENOG4111WQF(-)	PF07727.14(RVT_2:Reverse transcriptase (RNA-dependent DNA polymerase))	sp|P10978|POLX_TOBAC(Retrovirus-related Pol polyprotein from transposon TNT 1-94 OS=Nicotiana tabacum OX=4097 PE=2 SV=1)
MSTRG.22003			251	0	0	0	0	0	0	0	0	0	0	0	0	0	0	0	2	0	0	0	0	1	0	0	0	0	0	0	0	0	0	0	0	0.6667	0.3333	0	0
MSTRG.22038			277	15	21	13	4	3	22	20	6	7	9	17	5	18	12	16	10	14	24	4	15	10	23	5	13	14	10	5	8.3333	17.3333	5	16.6667	15.3333	12.6667	12.6667	4.6667	19	RQO98548.1(hypothetical protein POPTR_012G104050 [Populus trichocarpa])	GO:0016021(cellular_component:integral component of membrane)
MSTRG.22046			929	26	53	43	52	34	73	44	49	46	77	48	42	79	91	96	70	84	46	45	29	80	36	46	31	65	41	27	35.3333	67.6667	47.6667	45	88.6667	43.3333	76.3333	39.3333	41	XP_025689407.1(sialyltransferase-like protein 2 isoform X3 [Arachis hypogaea])	GO:0005794(cellular_component:Golgi apparatus); GO:0005802(cellular_component:trans-Golgi network); GO:0006486(biological_process:protein glycosylation); GO:0016021(cellular_component:integral component of membrane); GO:0009860(biological_process:pollen tube growth); GO:0009846(biological_process:pollen germination); GO:0005768(cellular_component:endosome); GO:0008373(molecular_function:sialyltra…				ENOG410XT8P(S:Function unknown)	ENOG410XT8P(ST3 beta-galactoside alpha-2,3-sialyltransferase)	PF00777.18(Glyco_transf_29:Glycosyltransferase family 29 (sialyltransferase))	sp|Q8RY00|SIA2_ARATH(Sialyltransferase-like protein 2 OS=Arabidopsis thaliana OX=3702 GN=SIA2 PE=2 SV=1)
MSTRG.22073			274	5.67	0	3.05	2.08	3.84	3.81	0.99	1.96	4	0	2.53	1.99	1	0	0	1.02	0	3.75	2.08	1	1	1.42	1.84	0.68	0	0	3.86	4.5033	1.27	2.01	2.19	0.3333	0.9	0.3333	2.5933	1.7233	PNT10536.1(hypothetical protein POPTR_012G107200 [Populus trichocarpa] )					ENOG410YQVJ(S:Function unknown)	ENOG410YQVJ(-)		sp|Q67XT3|SPC24_ARATH(Kinetochore protein SPC24 homolog OS=Arabidopsis thaliana OX=3702 GN=SPC24 PE=1 SV=1)
MSTRG.22084			286	573	555.91	617	794.89	521	1304	1140.69	1122	707	1130	1175.89	1081	1070	1199.92	1085	526	1139	1418.99	1579.82	588	845.99	1589.92	1821.91	559	949	1134	1466.99	600.333	996.637	999.297	977.86	1118.31	557.667	977.997	1622.91	1380.97	XP_024438648.1(uncharacterized protein LOC7484342 [Populus trichocarpa] )					ENOG41116G7(S:Function unknown)	ENOG41116G7(-)
MSTRG.22085			239	0	0	0	4	0	0	0	0	0	0	0	0	0	0	0	0	0	0	1	0	0	0	0	0	0	0	0	0	0	1.3333	0	0	0	0	0.3333	0
MSTRG.2211			784	29	21	34	23	22	16	26	23	26	13	20	18	18	18	23	25	28	31	19	21	14	28	21	26	23	44	12	25.6667	16.6667	21.3333	26.6667	19.6667	24	21.6667	17.3333	34.3333
MSTRG.22122			1705	313	511	506	571	248	557	539	623	290	732	492	691	353	427	368	480	503	677	580	340	641	700	620	497	697	714	501	283.667	600	628.333	512.333	382.667	439	613.667	567	697	PNS22548.1(hypothetical protein POPTR_T136000, partial [Populus trichocarpa])
MSTRG.22132			445	38.16	6.85	106.64	82.71	31.12	11.11	71.04	42.79	56.25	9.1	63.42	56.76	11.57	19.25	3.04	27.82	9.19	74.33	54.63	31.17	14.49	93.12	54.46	48.51	20.04	81.32	21.72	41.8433	9.02	60.7533	80.3667	11.2867	35.8333	14.5733	43.6033	82.9233	XP_024448812.1(protein ROOT HAIR DEFECTIVE 3 homolog 2 [Populus trichocarpa] )	GO:0016787(molecular_function:hydrolase activity); GO:0016021(cellular_component:integral component of membrane); GO:0005789(cellular_component:endoplasmic reticulum membrane); GO:0005525(molecular_function:GTP binding)				ENOG410XPVJ(Z:Cytoskeleton)	ENOG410XPVJ(GTPase activity)	PF05879.12(RHD3:Root hair defective 3 GTP-binding protein (RHD3)); PF01926.23(MMR_HSR1:50S ribosome-binding GTPase)	sp|Q9FKE9|RHD32_ARATH(Protein ROOT HAIR DEFECTIVE 3 homolog 2 OS=Arabidopsis thaliana OX=3702 GN=At5g45160 PE=2 SV=1)
MSTRG.22139			313	20.47	1.99	62.11	18.29	18.92	1	42.79	20.07	25.84	3.92	24.45	17.44	5.32	11.69	2.02	21.72	6	53.13	18.37	22.57	12.67	56.74	24.99	25.5	6.94	37.49	7.48	21.7433	2.3033	18.6	43.1167	6.3433	23.2633	8.5367	16.9467	49.12	XP_011003558.1(PREDICTED: protein ROOT HAIR DEFECTIVE 3 homolog 2-like isoform X1 [Populus euphratica])	GO:0016787(molecular_function:hydrolase activity); GO:0016021(cellular_component:integral component of membrane); GO:0005789(cellular_component:endoplasmic reticulum membrane); GO:0005525(molecular_function:GTP binding)				ENOG410XPVJ(Z:Cytoskeleton)	ENOG410XPVJ(GTPase activity)		sp|Q2R224|RHD32_ORYSJ(Protein ROOT HAIR DEFECTIVE 3 homolog 2 OS=Oryza sativa subsp. japonica OX=39947 GN=Os11g0582300 PE=2 SV=1)
MSTRG.22154			282	8	1	10	4	6	1	7	7	1	2	13	5	1	4	1	9	3	5	6	1	4	8	7	6	0	5	6	5	1.3333	5.3333	10	2	5.3333	2.3333	6.3333	6
MSTRG.2217			257	5	0	1	1	1	0	2	7	1	2	0	0	1	0	0	1	0	2	0	6	1	1	0	3	0	2	0	2.3333	0.6667	2.6667	1	0.3333	3.3333	0.3333	0	1.6667	TKS01784.1(hypothetical protein D5086_0000168910 [Populus alba])							PF05162.13(Ribosomal_L41:Ribosomal protein L41)
MSTRG.22173			1663	3	4	0	5	2	1	0	1	7	3	0	1	7	7	11	3	6	0	3	5	1	1	1	7	6	1	1	4	2.6667	2.3333	0	8.3333	5	4.3333	1.6667	0.6667	PNT10751.1(hypothetical protein POPTR_012G121600 [Populus trichocarpa])
MSTRG.22175			211	0	0	0	0	0	0	0	0	0	0	0	0	0	0	0	1	0	0	0	0	0	0	0	1	1	0	0	0	0	0	0	0	0.6667	0.3333	0	0
MSTRG.22192			799	15	7	14	12	17	23	17	7	18	19	12	7	17	26	30	31	25	8	6	14	14	16	8	20	23	16	5	16.6667	16.3333	8.6667	14.3333	24.3333	21.6667	20.6667	6.3333	13.3333	TKS01344.1(chaperonin 60 subunit alpha 2, chloroplastic-like [Populus alba])	GO:0005737(cellular_component:cytoplasm); GO:0042026(biological_process:protein refolding); GO:0005524(molecular_function:ATP binding); GO:0009507(cellular_component:chloroplast)				COG0459(S:Function unknown)	COG0459(-)	PF00118.24(Cpn60_TCP1:TCP-1/cpn60 chaperonin family)	sp|Q56XV8|CPNA2_ARATH(Chaperonin 60 subunit alpha 2, chloroplastic OS=Arabidopsis thaliana OX=3702 GN=CPN60A2 PE=2 SV=1)
MSTRG.22198			353	0	1	0	0	6	0	0	0	0	5	0	0	0	2	0	2	0	0	0	2	0	0	0	0	1	0	0	2	2	0	0	0.6667	1.3333	0.3333	0	0	XP_006305672.1(14 kDa zinc-binding protein isoform X1 [Capsella rubella] )	GO:0003824(molecular_function:catalytic activity); GO:0009507(cellular_component:chloroplast)	K02503	HINT1, hinT, hit		COG0537(S:Function unknown)	COG0537(nck-associated protein)		sp|Q8GUN2|HINT1_ARATH(Adenylylsulfatase HINT1 OS=Arabidopsis thaliana OX=3702 GN=HINT1 PE=1 SV=1)
MSTRG.22211			271	0	0	0	1	0	0	0	5	0	1	1	0	0	0	0	0	0	0	2	0	0	1	0	0	0	0	0	0	0.3333	2	0.3333	0	0	0	0.6667	0.3333
MSTRG.22301			866	0	5	1	4	0	4	1	2	0	2	4	0	10	2	10	0	4	8	2	1	3	8	1	0	1	4	3	0	3.6667	2	2	7.3333	0.3333	2.6667	2	6.6667	PNT10996.1(hypothetical protein POPTR_012G138000 [Populus trichocarpa])					ENOG410YC9P(S:Function unknown)	ENOG410YC9P(Domain of unknown function (DUF239))	PF03080.15(Neprosin:Neprosin)
MSTRG.22312			763	8	6	5	9	4	1	6	3	6	5	4	6	10	7	17	11	11	14	8	10	11	15	9	13	3	15	4	6	4	6	5	11.3333	11.3333	8.3333	7	14.6667
MSTRG.22381			2671	427	229	411	255	371	270	452	289	375	284	440	298	345	473	350	416	399	466	376	327	329	454	360	401	429	394	296	391	261	280.667	434.333	389.333	381.333	385.667	344	438	XP_024439399.1(uncharacterized protein LOC7478873 isoform X1 [Populus trichocarpa] )	GO:0008270(molecular_function:zinc ion binding)	K17604	ZSWIM3		ENOG410YFHW(S:Function unknown)	ENOG410YFHW(be involved in pre-mRNA splicing (By similarity))	PF03108.15(DBD_Tnp_Mut:MuDR family transposase); PF10551.9(MULE:MULE transposase domain); PF00564.24(PB1:PB1 domain); PF04434.17(SWIM:SWIM zinc finger)
MSTRG.22390			212	2	0	0	0	2	0	0	0	1	0	0	0	0	0	0	0	0	0	0	0	0	0	0	1	0	1	0	1.6667	0	0	0	0	0.3333	0	0	0.3333
MSTRG.22417			1743	46	47	53	49	47	49	69	51	60	37	48	52	58	78	38	54	35	72	43	64	27	73	44	66	41	73	46	51	44.3333	50.6667	56.6667	58	61.3333	34.3333	44.3333	72.6667	PNT05999.1(hypothetical protein POPTR_013G007200 [Populus trichocarpa])					ENOG4111JYH(S:Function unknown)	ENOG4111JYH(ovarian cancer-associated gene 2 protein)	PF03959.13(FSH1:Serine hydrolase (FSH1))	sp|Q94AC1|STR6_ARATH(Rhodanese-like domain-containing protein 6 OS=Arabidopsis thaliana OX=3702 GN=STR6 PE=2 SV=1)
MSTRG.22418			274	0	1	0	0	0	0	2	0	1	3	0	0	0	4	1	0	0	1	1	0	0	2	0	0	1	2	0	0.3333	1.3333	0	0.6667	1.6667	0	0.3333	0.3333	1.6667	TKR91847.1(hypothetical protein D5086_0000219690 [Populus alba])					ENOG4111JYH(S:Function unknown)	ENOG4111JYH(ovarian cancer-associated gene 2 protein)		sp|Q94AC1|STR6_ARATH(Rhodanese-like domain-containing protein 6 OS=Arabidopsis thaliana OX=3702 GN=STR6 PE=2 SV=1)
MSTRG.2243			253	0	1	0	0	0	0	0	0	0	4	0	0	2	0	0	0	0	0	0	0	1	0	1	1	2	1	0	0	1.6667	0	0	0.6667	0.3333	1	0.3333	0.3333	RQO95664.1(hypothetical protein POPTR_009G077200 [Populus trichocarpa] )	GO:0016758(molecular_function:transferase activity, transferring hexosyl groups)
MSTRG.22469			342	0	2	1	0	0	2	2	4	1	1	2	0	1	2	2	1	3	3	2	3	2	2	2	2	3	0	0	0.3333	1.6667	1.3333	1.6667	1.6667	2	2.6667	1.3333	1.6667	TKS04276.1(hypothetical protein D5086_0000144770 [Populus alba])	GO:0004857(molecular_function:enzyme inhibitor activity); GO:0043086(biological_process:negative regulation of catalytic activity)
MSTRG.22474			3226	482	371	546	539	412.46	399	505	420	535	455	485	446.04	401	407	404	456	462	437	481	371.03	418	486	487	439	424	521	353	476.487	408.333	468.347	512	404	422.01	434.667	440.333	481.333	XP_002319505.2(uncharacterized protein LOC7481720 [Populus trichocarpa] )					ENOG410ZN88(S:Function unknown); ENOG410YPRN(S:Function unknown)	ENOG410ZN88(Retrotransposon protein); ENOG410YPRN(Plant mobile domain)	PF10536.9(PMD:Plant mobile domain)
MSTRG.22518			333	2	3	10	7	6	1	7	16	6	1	9	18	5	2	2	7	3	13	8	8	5	6	9	14	2	13	8	4.6667	1.6667	13.6667	8.6667	3	9.6667	3.3333	8.3333	10.6667	XP_006382503.1(uncharacterized protein LOC18098690 [Populus trichocarpa] )					ENOG41116I1(S:Function unknown)	ENOG41116I1(-)
MSTRG.22604			430	4.89	0	0	22.06	2.98	5.84	0	38.79	4	4.06	0	0	1.97	0.63	5.06	4.95	1.57	2.91	17.57	0	0	5	0	0	10.97	0	30.81	3.9567	3.3	20.2833	0	2.5533	1.65	4.18	16.1267	2.6367	ABF81447.1(NBS type disease resistance protein [Populus trichocarpa])	GO:0000015(cellular_component:phosphopyruvate hydratase complex); GO:0043531(molecular_function:ADP binding); GO:0000943(cellular_component:retrotransposon nucleocapsid); GO:0000287(molecular_function:magnesium ion binding); GO:0006096(biological_process:glycolytic process); GO:0003887(molecular_function:DNA-directed DNA polymerase activity); GO:0015074(biological_process:DNA integration); GO:000…				COG2801(L:Replication, recombination and repair); ENOG410XS4D(S:Function unknown)	COG2801(Retrotransposon protein); ENOG410XS4D(Retrotransposon protein)		sp|P04146|COPIA_DROME(Copia protein OS=Drosophila melanogaster OX=7227 GN=GIP PE=1 SV=3)
MSTRG.22605			229	0.85	0.67	0	28.24	1.81	0	0	11.97	0	0	1	10.09	0	0	0	1.69	0	0	3.47	1	0	0	1.25	0	0	0	6.32	0.8867	0.2233	16.7667	0.3333	0	0.8967	0	3.68	0	XP_024445362.1(uncharacterized protein LOC112324933 [Populus trichocarpa])	GO:0000943(cellular_component:retrotransposon nucleocapsid); GO:0015074(biological_process:DNA integration); GO:0003676(molecular_function:nucleic acid binding); GO:0043531(molecular_function:ADP binding); GO:0008270(molecular_function:zinc ion binding)				COG2801(L:Replication, recombination and repair)	COG2801(Retrotransposon protein)	PF13976.6(gag_pre-integrs:GAG-pre-integrase domain)
MSTRG.22606			579	12.06	9.59	4.03	91.1	4.34	8.22	2.94	83.54	8.97	10.13	6.55	92.33	7.72	2.75	10.95	7.78	8.89	3.99	86.15	3.86	14.72	2	93.3	10.88	15.97	7.21	84.57	8.4567	9.3133	88.99	4.5067	7.14	7.5067	13.1933	88.0067	4.4	XP_024456440.1(uncharacterized protein LOC112327482 [Populus trichocarpa])	GO:0000943(cellular_component:retrotransposon nucleocapsid); GO:0015074(biological_process:DNA integration); GO:0003676(molecular_function:nucleic acid binding)						PF14223.6(Retrotran_gag_2:gag-polypeptide of LTR copia-type)
MSTRG.22660			209	0	0	0	0	0	0	0	0	0	1	0	1	0	0	1	0	0	0	0	1	0	0	1	0	1	0	0	0	0.3333	0.3333	0	0.3333	0.3333	0.3333	0.3333	0	ABG37667.2(transposase tnp2, partial [Populus trichocarpa])	GO:0015074(biological_process:DNA integration); GO:0003676(molecular_function:nucleic acid binding)						PF13960.6(DUF4218:Domain of unknown function (DUF4218))
MSTRG.22672			202	0	0	0	1	1	0	0	0	0	0	0	1	0	4	1	2	0	0	0	1	1	0	1	2	0	0	0	0.3333	0	0.6667	0	1.6667	1.6667	0.3333	0.3333	0
MSTRG.22693			2859	206	151.4	159	194	199	200	224	188	239.03	154.57	205	227	158	154	147	255	201.27	173	240	200.69	130	186.28	204	226.19	192	228.34	194	214.677	168.657	203	196	153	227.293	174.423	212.667	195.873	XP_002319648.2(uncharacterized protein LOC7474616 [Populus trichocarpa])	GO:0008270(molecular_function:zinc ion binding)				ENOG4111MDI(S:Function unknown)	ENOG4111MDI(ZnF_PMZ)	PF03108.15(DBD_Tnp_Mut:MuDR family transposase); PF10551.9(MULE:MULE transposase domain); PF04434.17(SWIM:SWIM zinc finger); PF00872.18(Transposase_mut:Transposase, Mutator family)
MSTRG.22694			413	5	3	3	1	1	4	2	2	3	0	0	2	3	0	2	11	6	6	2	2	2	3	6	4	6	3	4	3	2.3333	1.6667	1.6667	1.6667	5.6667	4.6667	4	4
MSTRG.22711			254	2	2	1	2	0	0	4.97	5	1	1	0	6	3	4	1	2	2	4	3	3	0	2	1	7	7	2	1	1	1	4.3333	1.99	2.6667	4	3	1.6667	2.6667
MSTRG.22746			547	11	6	82	16	15	10	112	16	22	11	71	28	16	30	28	13	15	97	20	26	22	132	22	13	10	89	29	16	9	20	88.3333	24.6667	17.3333	15.6667	23.6667	106
MSTRG.22748			440	8	1	3	87	0	1	2	47	2	1	0	80	2	4	8	6	7	1	59	11	7	5	83	9	11	4	112	3.3333	1	71.3333	1.6667	4.6667	8.6667	8.3333	84.6667	3.3333	TKR90875.1(uncharacterized protein D5086_0000229610 [Populus alba])	GO:0016021(cellular_component:integral component of membrane); GO:0008519(molecular_function:ammonium transmembrane transporter activity)	K07573;K03320	CSL4, EXOSC1;amt, AMT, MEP	map03018(RNA degradation)	COG0004(S:Function unknown)	COG0004(-)	PF00909.21(Ammonium_transp:Ammonium Transporter Family)	sp|Q9ZPJ8|AMT12_ARATH(Ammonium transporter 1 member 2 OS=Arabidopsis thaliana OX=3702 GN=AMT1-2 PE=1 SV=1)
MSTRG.22781			208	0	0	0	0	0	0	0	0	0	0	0	0	0	0	0	0	0	0	0	0	0	0	0	0	0	0	0	0	0	0	0	0	0	0	0	0	XP_022847510.1(uncharacterized protein LOC111370031 [Olea europaea var. sylvestris])	GO:0008519(molecular_function:ammonium transmembrane transporter activity); GO:0000943(cellular_component:retrotransposon nucleocapsid); GO:0016021(cellular_component:integral component of membrane); GO:0015074(biological_process:DNA integration); GO:0008270(molecular_function:zinc ion binding); GO:0003676(molecular_function:nucleic acid binding); GO:0016866(molecular_function:intramolecular tran…				COG2801(L:Replication, recombination and repair); ENOG410XS4D(S:Function unknown)	COG2801(Retrotransposon protein); ENOG410XS4D(Retrotransposon protein)	PF13976.6(gag_pre-integrs:GAG-pre-integrase domain)
MSTRG.22789			233	2	4	2	8	5	2	7	13	3	2	5	8	4	2	1	2	2	5	6	6	2	7	11	2	6	7	8	3.3333	2.6667	9.6667	4.6667	2.3333	3.3333	3.3333	8.3333	6.3333	XP_024464047.1(2-hydroxyisoflavanone dehydratase [Populus trichocarpa] )	GO:0016787(molecular_function:hydrolase activity); GO:0022857(molecular_function:transmembrane transporter activity); GO:0016021(cellular_component:integral component of membrane)				COG0657(S:Function unknown)	COG0657(annexin A7)	PF07859.13(Abhydrolase_3:alpha/beta hydrolase fold)	sp|Q9SX78|CXE2_ARATH(Probable carboxylesterase 2 OS=Arabidopsis thaliana OX=3702 GN=CXE2 PE=2 SV=1)
MSTRG.22801			367	2	1	1	4	0	5	8	2	0	1	8	5	5	4	9	2	2	7	5	5	3	2	6	10	9	7	10	0.6667	2.3333	3.6667	5.6667	6	5.6667	4.6667	7	5.3333	PNT06897.1(hypothetical protein POPTR_013G057400 [Populus trichocarpa] )	GO:0016021(cellular_component:integral component of membrane)
MSTRG.22834			499	13	23	5	2	6	24	5	0	16	34	13	0	13	24	17	12	16	13	0	17	27	11	2	6	25	5	0	11.6667	27	0.6667	7.6667	18	11.6667	22.6667	0.6667	9.6667
MSTRG.22839			217	0	0	0	0	0	0	0	0	0	0	0	0	0	0	0	0	0	0	0	0	0	0	0	0	0	0	0	0	0	0	0	0	0	0	0	0	PNT06994.1(hypothetical protein POPTR_013G061900 [Populus trichocarpa])
MSTRG.22873			1770	1	8	1	6	6	23	3	7	4	11	0	3	16	52	10	5	13	2	2	3	8	0	4	0	14	1	1	3.6667	14	5.3333	1.3333	26	2.6667	11.6667	2.3333	1
MSTRG.22878			1799	5	18	6	35	2	45	4	34	9	16	5	39	19	25	9	7	5	9	27	3	5	11	33	3	22	7	28	5.3333	26.3333	36	5	17.6667	4.3333	10.6667	29.3333	9	PNS94619.1(hypothetical protein POPTR_017G006600 [Populus trichocarpa])	GO:0016021(cellular_component:integral component of membrane)
MSTRG.22902			207	14.32	13.36	9.53	18.39	6.12	12.15	8.3	18.02	5.15	10.13	6.05	11.16	11.09	8.18	7	2.02	11.2	20.67	19.37	10.16	8.44	22.6	23.73	6.51	7.65	14.68	6.25	8.53	11.88	15.8567	7.96	8.7567	6.23	9.0967	16.45	19.3167
MSTRG.22949			1311	21	20	30	15	10	18	21	17	23	27	18	13	48	64	52	20	45	32	20	17	55	22	5	25	58	27	13	18	21.6667	15	23	54.6667	20.6667	52.6667	12.6667	27	PNT07265.1(hypothetical protein POPTR_013G075700 [Populus trichocarpa])	GO:0016021(cellular_component:integral component of membrane)
MSTRG.22969			1045	14	20	21	31	26	35	31	30	18	31	33	46	56	42	54	26	49	20	24	24	36	30	32	35	37	19	33	19.3333	28.6667	35.6667	28.3333	50.6667	28.3333	40.6667	29.6667	23	PNT07309.1(hypothetical protein POPTR_013G078300, partial [Populus trichocarpa])	GO:0017183(biological_process:peptidyl-diphthamide biosynthetic process from peptidyl-histidine); GO:0016740(molecular_function:transferase activity)	K07561	DPH1, dph2		COG1736(O:Posttranslational modification, protein turnover, chaperones)	COG1736(DNAj domain protein)	PF01866.17(Diphthamide_syn:Putative diphthamide synthesis protein)	sp|Q9BZG8|DPH1_HUMAN(2-(3-amino-3-carboxypropyl)histidine synthase subunit 1 OS=Homo sapiens OX=9606 GN=DPH1 PE=1 SV=2)
MSTRG.22990			814	4	4	20	10	1	5	11	12	1	1	9	8	3	3	3	1	3	8	6	3	7	6	6	9	2	5	9	2	3.3333	10	13.3333	3	4.3333	4	7	6.3333	PNT07379.1(hypothetical protein POPTR_013G082400 [Populus trichocarpa])
MSTRG.22994			2297	421.51	366	356.13	397	363.14	388.17	436	419	430.48	409	429	446	496.58	510.6	496	464	452	437	443	385.66	439.39	519	469	436	502.26	473.54	398	405.043	387.723	420.667	407.043	501.06	428.553	464.55	436.667	476.513	XP_006376011.1(uncharacterized protein LOC18104200 isoform X1 [Populus trichocarpa] )	GO:0008270(molecular_function:zinc ion binding)				ENOG410Y985(S:Function unknown)	ENOG410Y985(Pfam:MuDR)	PF03108.15(DBD_Tnp_Mut:MuDR family transposase); PF10551.9(MULE:MULE transposase domain); PF04434.17(SWIM:SWIM zinc finger); PF00872.18(Transposase_mut:Transposase, Mutator family)
MSTRG.23006			721	9	8.06	6	10.92	9	20	11	10	11.98	10.06	19	17.12	23	26.17	16	13	18	13	8	13	19	7	11	14.43	25	13	14.9	9.9933	12.7067	12.68	12	21.7233	13.4767	20.6667	11.3	11
MSTRG.23028			203	0	0	0	0	1	0	0	1	1	0	0	0	0	0	0	1	0	1	0	0	0	2	1	0	0	0	1	0.6667	0	0.3333	0	0	0.3333	0	0.6667	1	XP_011034354.1(PREDICTED: uncharacterized protein LOC105132503 [Populus euphratica])					ENOG410XWK2(S:Function unknown); ENOG41107JT(S:Function unknown)	ENOG410XWK2(transposon protein); ENOG41107JT(Pfam:hATC)
MSTRG.23029			453	2	7	2	3	7	3	3	7	3	2	1	2	6	2	3	3	6	4	2	2	11	0	0	2	5	3	7	4	4	4	2	3.6667	2.3333	7.3333	3	2.3333	XP_011001694.1(PREDICTED: uncharacterized protein LOC105108893 [Populus euphratica])	GO:0003677(molecular_function:DNA binding)				ENOG410XWK2(S:Function unknown); ENOG410YEJC(S:Function unknown)	ENOG410XWK2(transposon protein); ENOG410YEJC(Protein of unknown function (DUF 659))	PF04937.15(DUF659:Protein of unknown function (DUF 659))
MSTRG.23036			407	0	0	0	0	0	0	0	0	0	0	0	0	0	0	0	0	0	0	0	0	0	0	0	0	0	0	0	0	0	0	0	0	0	0	0	0	PNT43355.1(hypothetical protein POPTR_003G029800 [Populus trichocarpa])	GO:0016021(cellular_component:integral component of membrane)
MSTRG.23066			634	0	0	0	0	0	0	0	0	0	0	2	0	0	0	0	0	0	1	0	0	0	1	0	0	0	0	0	0	0	0	0.6667	0	0	0	0	0.6667
MSTRG.23087			259	0	0	0	0	1	0	2	1	0	0	0	0	0	0	0	0	0	1	2	0	0	0	2	1	0	0	0	0.3333	0	0.3333	0.6667	0	0.3333	0	1.3333	0.3333	XP_021642332.1(dynamin-2A-like [Hevea brasiliensis])	GO:0003924(molecular_function:GTPase activity); GO:0005525(molecular_function:GTP binding)	K01528	DNM	map04144(Endocytosis)	COG0699(S:Function unknown)	COG0699(Dynamin family)		sp|Q9SE83|DRP2A_ARATH(Dynamin-2A OS=Arabidopsis thaliana OX=3702 GN=DRP2A PE=1 SV=2)
MSTRG.23092			343	1	1	4.51	13.25	0	2	2	7.28	0	1.46	5.89	13.32	0	0	0	0	0	8.55	4.88	1	1	1.27	10.9	0	0	2.48	9.22	0.3333	1.4867	11.2833	4.1333	0	0.3333	0.3333	8.3333	4.1	XP_011004853.1(PREDICTED: TMV resistance protein N-like isoform X2 [Populus euphratica])	GO:0007165(biological_process:signal transduction); GO:0043531(molecular_function:ADP binding)				COG4886(S:Function unknown); ENOG4112BMQ(S:Function unknown)	COG4886(leucine Rich Repeat); ENOG4112BMQ(TMV resistance protein N-like)		sp|Q9SZ66|DSC1_ARATH(Disease resistance-like protein DSC1 OS=Arabidopsis thaliana OX=3702 GN=DSC1 PE=1 SV=1)
MSTRG.23108			258	0	0	0	12.44	0	0.39	0	22.99	0	0	0	13.89	0	0	0	0	0	0	9.98	0	1	0	12.8	0	0	0.98	6.36	0	0.13	16.44	0	0	0	0.3333	9.7133	0.3267	XP_024439636.1(disease resistance-like protein DSC1 [Populus trichocarpa])	GO:0007165(biological_process:signal transduction); GO:0043531(molecular_function:ADP binding)				COG4886(S:Function unknown)	COG4886(leucine Rich Repeat)
MSTRG.2311			1173	1	0	0	4	0	5	2	7	1	2	2	11	5	8	5	0	5	3	14	1	5	1	19	1	7	3	12	0.6667	2.3333	7.3333	1.3333	6	0.6667	5.6667	15	2.3333	PNT57327.1(hypothetical protein POPTR_001G293000 [Populus trichocarpa])
MSTRG.23124			427	5	2	3	0	0	1	0	2	1	6	2	3	1	3	7	3	5	0	1	0	3	1	0	2	2	1	1	2	3	1.6667	1.6667	3.6667	1.6667	3.3333	0.6667	0.6667
MSTRG.23138			306	8	21	16	33	4	6	15	33	11	15	19	36	4	8	4	6	11	19	34	8	15	26	38	12	6	14	22	7.6667	14	34	16.6667	5.3333	8.6667	10.6667	31.3333	19.6667
MSTRG.23193			1057	22	8	8	13	27	7	8.99	9	18	6	15	14	19	21.06	16	22	15	8	18	31	9	16	15	23	36	15	16	22.3333	7	12	10.6633	18.6867	25.3333	20	16.3333	13	RQO99281.1(hypothetical protein POPTR_013G109600 [Populus trichocarpa])	GO:0003677(molecular_function:DNA binding); GO:0005524(molecular_function:ATP binding); GO:0043140(molecular_function:ATP-dependent 3'-5' DNA helicase activity); GO:0006281(biological_process:DNA repair)	K10896	FANCM		COG1111(K:Transcription)	COG1111(Myblike DNAbinding domain containing protein)		sp|I3XHK1|FANCM_ARATH(DEAD-box ATP-dependent RNA helicase FANCM OS=Arabidopsis thaliana OX=3702 GN=FANCM PE=2 SV=1)
MSTRG.23200			414	33.91	9.76	19.14	11.18	9.51	6.48	19.28	5.56	29.73	14.78	6.73	5.3	9.35	18.97	13.46	7.9	9	14.14	12.54	23.93	22.23	18.89	16.4	28.87	4.91	24.41	10.91	24.3833	10.34	7.3467	15.05	13.9267	20.2333	12.0467	13.2833	19.1467	PNT07809.1(hypothetical protein POPTR_013G110100 [Populus trichocarpa])	GO:0051015(molecular_function:actin filament binding); GO:0005774(cellular_component:vacuolar membrane)				ENOG410YNSE(S:Function unknown)	ENOG410YNSE(Component of the spindle pole body (SPB) required for the proper execution of spindle pole body (SPB) duplication. Potential role in cross-linking filaments or anchoring other molecules. It is essential for growth (By similarity))		sp|Q9M7J4|MFP1_TOBAC(MAR-binding filament-like protein 1-1 OS=Nicotiana tabacum OX=4097 GN=MFP1-1 PE=2 SV=1)
MSTRG.23202			449	51.98	49	45	36	24	42.7	39.99	49	48.66	41	68.99	25.27	71	53	67	44.99	53	63	51	26.07	56.99	76	48.51	50	63	60	43	41.5467	44.2333	36.7567	51.3267	63.6667	40.3533	57.6633	47.5033	66.3333	RQO99281.1(hypothetical protein POPTR_013G109600 [Populus trichocarpa])	GO:0003677(molecular_function:DNA binding); GO:0005524(molecular_function:ATP binding); GO:0043140(molecular_function:ATP-dependent 3'-5' DNA helicase activity); GO:0006281(biological_process:DNA repair)	K10896	FANCM		COG1111(L:Replication, recombination and repair)	COG1111(helicase)		sp|I3XHK1|FANCM_ARATH(DEAD-box ATP-dependent RNA helicase FANCM OS=Arabidopsis thaliana OX=3702 GN=FANCM PE=2 SV=1)
MSTRG.23216			318	0	0	0	0	0	0	1	0	0	1	2	0	0	0	0	0	2	2	0	0	0	1	0	0	0	0	0	0	0.3333	0	1	0	0	0.6667	0	1	XP_024447069.1(uncharacterized protein LOC7475801 isoform X1 [Populus trichocarpa] )					ENOG410XSWW(S:Function unknown)	ENOG410XSWW(Chromosome 10 open reading frame 137)
MSTRG.23219			264	5.98	10.67	3.29	10.23	2.16	7.14	4	8.2	3	5	3.88	6.24	4.3	6.17	5.33	9.32	3.12	12.9	10.99	4	1.99	5.31	4.72	5.15	6.94	4.25	5.08	3.7133	7.6033	8.2233	3.7233	5.2667	6.1567	4.0167	6.93	7.4867	XP_011046988.1(PREDICTED: malonyl-CoA decarboxylase, mitochondrial isoform X2 [Populus euphratica])		K01578	MLYCD	map04146(Peroxisome); map00640(Propanoate metabolism); map00410(beta-Alanine metabolism)	COG1593(G:Carbohydrate transport and metabolism)	COG1593(trap dicarboxylate transporter dctm subunit)
MSTRG.23224			1098	28.31	19	15.55	21	19.51	32.27	27	23.34	39.39	19.36	32.23	31.8	46.5	38.04	48.76	40.84	37.14	29.75	23.48	37.61	41.46	38.36	28.54	34.09	50.24	37.61	25.51	29.07	23.5433	25.38	24.9267	44.4333	37.5133	42.9467	25.8433	35.24	XP_024439082.1(uncharacterized protein LOC18104460 [Populus trichocarpa] )					COG0484(O:Posttranslational modification, protein turnover, chaperones)	COG0484(ATP binding to DnaK triggers the release of the substrate protein, thus completing the reaction cycle. Several rounds of ATP-dependent interactions between DnaJ, DnaK and GrpE are required for fully efficient folding. Also involved, together with DnaK and GrpE, in the DNA replication of plasmids through activation of initiation proteins (By similarity))
MSTRG.23225			420	5.69	1	5.45	8	4.49	3.73	10	5.66	4.61	1.64	3.77	7.2	9.5	12.96	6.24	3.16	0.86	10.25	3.52	5.39	1.54	6.71	3.46	4.91	6.76	12.39	2.49	4.93	2.1233	6.9533	6.4067	9.5667	4.4867	3.0533	3.1567	9.7833	TKS07021.1(TRAF3-interacting protein 1 [Populus alba])					COG0484(O:Posttranslational modification, protein turnover, chaperones)	COG0484(ATP binding to DnaK triggers the release of the substrate protein, thus completing the reaction cycle. Several rounds of ATP-dependent interactions between DnaJ, DnaK and GrpE are required for fully efficient folding. Also involved, together with DnaK and GrpE, in the DNA replication of plasmids through activation of initiation proteins (By similarity))
MSTRG.23274			494	3	0	4	1	5	0	3	1	13	0	4	2	0	0	0	5	1	11	2	3	0	7	2	6	0	11	2	7	0	1.3333	3.6667	0	4.6667	0.3333	2	9.6667	PNT07958.1(hypothetical protein POPTR_013G119300 [Populus trichocarpa])
MSTRG.23282			393	20	8	27	18	11	5	21	22	25	14	29	12	9	14	11	24.1	12	21	13	8	13	21	18	16	12	27	3	18.6667	9	17.3333	25.6667	11.3333	16.0333	12.3333	11.3333	23	PNT07972.1(hypothetical protein POPTR_013G120200, partial [Populus trichocarpa])	GO:0004185(molecular_function:serine-type carboxypeptidase activity)	K16296	SCPL-I		COG2939(S:Function unknown)	COG2939(Dynamin family)	PF00450.22(Peptidase_S10:Serine carboxypeptidase)	sp|Q9CAU3|SCP2_ARATH(Serine carboxypeptidase-like 2 OS=Arabidopsis thaliana OX=3702 GN=SCPL2 PE=2 SV=1)
MSTRG.23283			549	14	3.99	16.03	4	18.03	11	24.19	4	15	14	21	3	11.01	17.03	15	10.77	19.63	25.07	8.03	15	8.01	22	3.71	20.05	8	19.43	5.23	15.6767	9.6633	3.6667	20.4067	14.3467	15.2733	11.88	5.6567	22.1667	XP_011006024.1(PREDICTED: serine carboxypeptidase-like 3 isoform X2 [Populus euphratica])	GO:0004185(molecular_function:serine-type carboxypeptidase activity)	K16296	SCPL-I		COG2939(E:Amino acid transport and metabolism)	COG2939(carboxy-peptidase)	PF00450.22(Peptidase_S10:Serine carboxypeptidase)	sp|Q9SQX6|SCP7_ARATH(Serine carboxypeptidase-like 7 OS=Arabidopsis thaliana OX=3702 GN=SCPL7 PE=2 SV=1)
MSTRG.23311			480	5	1	4	3.01	2	0	1	5	3	6	13	7	7	6.03	2	7	7	5	2	5	3	5	4	6	4.04	4	4	3.3333	2.3333	5.0033	6	5.01	6	4.68	3.3333	4.6667	PNT04967.1(hypothetical protein POPTR_014G149100 [Populus trichocarpa])	GO:0016021(cellular_component:integral component of membrane); GO:0008276(molecular_function:protein methyltransferase activity)				ENOG4111M16(S:Function unknown)	ENOG4111M16(Putative methyltransferase)	PF10294.9(Methyltransf_16:Lysine methyltransferase)
MSTRG.23313			461	1	1	0	0	1	6	1	0	4	1	0	1	3	1	3	0	1	1	2	1	4	0	2	2	2	3	1	2	2.6667	0.3333	0.3333	2.3333	1	2.3333	1.6667	1.3333	PNT08049.1(hypothetical protein POPTR_013G125400 [Populus trichocarpa])	GO:0016021(cellular_component:integral component of membrane); GO:0055114(biological_process:oxidation-reduction process)				ENOG410ZQWP(S:Function unknown); ENOG410XR70(S:Function unknown); ENOG410ZQY1(S:Function unknown)	ENOG410ZQWP(Eukaryotic cytochrome b561); ENOG410XR70(Ferric-chelate reductase); ENOG410ZQY1(Eukaryotic cytochrome b561)
MSTRG.23317			211	0	0	0	0	0	0	0	0	0	0	0	0	0	0	0	0	0	0	0	0	0	0	0	0	0	0	0	0	0	0	0	0	0	0	0	0	RQO99342.1(hypothetical protein POPTR_013G125900 [Populus trichocarpa])		K14767	UTP3, SAS10		ENOG410XSPX(S:Function unknown)	ENOG410XSPX(UTP3, small subunit (SSU) processome component, homolog (S. cerevisiae))
MSTRG.23370			207	1.49	0	1.82	2.25	0.26	1.55	0	1	4.97	0.09	2.5	1	0	0	3.56	2.94	0	4.71	0	0.52	0.35	2.53	0	3.12	5.51	0	1	2.24	0.5467	1.4167	1.44	1.1867	2.1933	1.9533	0.3333	2.4133
MSTRG.23374			238	0	0	0	1	0	0	0	1	0	0	0	0	0	0	0	0	0	0	0	0	0	0	1	0	0	0	0	0	0	0.6667	0	0	0	0	0.3333	0
MSTRG.23411			712	7	7	1	1	7	6	2	1	3	6	2	2	5	7	7	15	7	1	2	7	9	2	4	13	8	0	1	5.6667	6.3333	1.3333	1.6667	6.3333	11.6667	8	2.3333	1	TKS16649.1(uncharacterized protein D5086_0000021790 [Populus alba])	GO:0016021(cellular_component:integral component of membrane)				ENOG410ZASQ(S:Function unknown)	ENOG410ZASQ(Indole-3-acetic acid-amido synthetase)
MSTRG.23412			508	10	4	3	3	5	8	5	2	1	3	10	4	8	11	8	7	12	0	6	6	10	5	2	11	12	7	1	5.3333	5	3	6	9	8	11.3333	3	4	PNT08347.1(hypothetical protein POPTR_013G144500 [Populus trichocarpa])
MSTRG.23434			208	1	0	1	0	0	0	0	0	0	0	0	1	0	3	0	0	0	2	1	0	0	0	0	1	1	3	0	0.3333	0	0.3333	0.3333	1	0.3333	0.3333	0.3333	1.6667	RQP03779.1(hypothetical protein POPTR_019G116133 [Populus trichocarpa])
MSTRG.23450			927	0	0	0	7	0	0	1	6	0	0	1	18	0	0	0	0	0	1	4	0	0	0	3	0	0	3	8	0	0	10.3333	0.6667	0	0	0	5	1.3333	PNT08435.1(hypothetical protein POPTR_013G150700 [Populus trichocarpa])	GO:0006468(biological_process:protein phosphorylation); GO:0016021(cellular_component:integral component of membrane); GO:0004672(molecular_function:protein kinase activity); GO:0030247(molecular_function:polysaccharide binding); GO:0030246(molecular_function:carbohydrate binding); GO:0004674(molecular_function:protein serine/threonine kinase activity); GO:0004713(molecular_function:protein tyros…				COG0515(P:Inorganic ion transport and metabolism)	COG0515(frataxin-like protein)		sp|Q9ZR08|Y4230_ARATH(G-type lectin S-receptor-like serine/threonine-protein kinase At4g03230 OS=Arabidopsis thaliana OX=3702 GN=At4g03230 PE=3 SV=3)
MSTRG.23461			216	4	2.04	7.08	4.99	4	2	3	3.38	6	2.56	8.25	7.73	0	4	3	4.26	0	6.58	6.6	3.36	0.99	11	3.77	2.94	1	2	1.99	4.6667	2.2	5.3667	6.11	2.3333	3.52	0.6633	4.12	6.5267	TKS00160.1(hypothetical protein D5086_0000183730 [Populus alba])	GO:0005789(cellular_component:endoplasmic reticulum membrane); GO:0016021(cellular_component:integral component of membrane); GO:0008250(cellular_component:oligosaccharyltransferase complex); GO:0018279(biological_process:protein N-linked glycosylation via asparagine); GO:0005783(cellular_component:endoplasmic reticulum)	K12670	WBP1	map00510(N-Glycan biosynthesis); map04141(Protein processing in endoplasmic reticulum)	ENOG410XSF3(S:Function unknown)	ENOG410XSF3(F-box FBD LRR-repeat protein)	PF03345.14(DDOST_48kD:Oligosaccharyltransferase 48 kDa subunit beta)	sp|Q944K2|OST48_ARATH(Dolichyl-diphosphooligosaccharide--protein glycosyltransferase 48 kDa subunit OS=Arabidopsis thaliana OX=3702 GN=OST48 PE=2 SV=1)
MSTRG.23472			841	10	3	4	6	6	9	6	6	11	1	1	2	9	5	8	12	11	2	6	2	1	1	8	4	4	2	5	9	4.3333	4.6667	3.6667	7.3333	6	5.3333	6.3333	1.6667	TKS16488.1(hypothetical protein D5086_0000023150 [Populus alba])	GO:0016567(biological_process:protein ubiquitination); GO:0006511(biological_process:ubiquitin-dependent protein catabolic process); GO:0031146(biological_process:SCF-dependent proteasomal ubiquitin-dependent protein catabolic process); GO:0019005(cellular_component:SCF ubiquitin ligase complex)	K10268	FBXL2_20		ENOG410XQ54(K:Transcription)	ENOG410XQ54(WRKY transcription factor)		sp|Q8RWU5|FBL3_ARATH(F-box/LRR-repeat protein 3 OS=Arabidopsis thaliana OX=3702 GN=FBL3 PE=2 SV=1)
MSTRG.23493			280	0	0	0	0	2.53	0	1.27	1.91	3.66	0	0	0	0	0	0	3.03	0	0	1.18	4.42	0	2.42	0	1.28	0	3.05	0	2.0633	0	0.6367	0.4233	0	2.91	0	0.3933	1.8233
MSTRG.23521			1100	4	0	12	5	6	0	20	2	3	0	20	0	1	1	0	0	3	9	0	4	1	21	1	12	0	14	0	4.3333	0	2.3333	17.3333	0.6667	5.3333	1.3333	0.3333	14.6667
MSTRG.23522			1926	33	6	72	37	13	2	46	35	23	8	77	33	4	8	3	2	6	79	38	18	14	76	19	29	1	72	30	23	5.3333	35	65	5	16.3333	7	29	75.6667	PNT08607.1(hypothetical protein POPTR_013G160300 [Populus trichocarpa])	GO:0016758(molecular_function:transferase activity, transferring hexosyl groups); GO:0004523(molecular_function:RNA-DNA hybrid ribonuclease activity); GO:0003676(molecular_function:nucleic acid binding)	K11723	BRD7	map05225(Hepatocellular carcinoma)	ENOG410Y65V(S:Function unknown); ENOG4111K5V(S:Function unknown)	ENOG410Y65V(-); ENOG4111K5V(Reverse transcriptase (RNA-dependent DNA polymerase))
MSTRG.23564			1208	13	30	8	6	11	24	11	8	19	34	19	8	29	36	33	25	28	12	9	12	20	4	10	21	21	13	8	14.3333	29.3333	7.3333	12.6667	32.6667	19.3333	23	9	9.6667
MSTRG.23586			363	0	1	0	2	0	0	7	3	0	1	3	3	2	0	0	0	1	2.69	2	0	0	6	4.83	0	0	10	3.24	0	0.6667	2.6667	3.3333	0.6667	0	0.3333	3.3567	6.23	XP_018824498.1(PREDICTED: uncharacterized protein LOC108993898 [Juglans regia])					ENOG410YMEY(S:Function unknown); COG2801(L:Replication, recombination and repair); COG0666(S:Function unknown)	ENOG410YMEY(-); COG2801(Retrotransposon protein); COG0666(Ankyrin Repeat)	PF14223.6(Retrotran_gag_2:gag-polypeptide of LTR copia-type); PF14244.6(Retrotran_gag_3:gag-polypeptide of LTR copia-type)
MSTRG.23623			411	7	2	10	0	2	2	3	0	2	0	2	2	5	4	3	5	2	10	0	8	1	7	0	8	1	5	0	3.6667	1.3333	0.6667	5	4	7	1.3333	0	7.3333	PNT02372.1(hypothetical protein POPTR_014G009800 [Populus trichocarpa])	GO:0005737(cellular_component:cytoplasm); GO:0004042(molecular_function:acetyl-CoA:L-glutamate N-acetyltransferase activity); GO:0006526(biological_process:arginine biosynthetic process)	K14682	argAB	map00220(Arginine biosynthesis)
MSTRG.23641			430	0	1	0	0	0	0	0	1.86	0	0	0	8.56	0	0	0	0	0	0	3	1	0	0	0	0	0	0	0	0	0.3333	3.4733	0	0	0.3333	0	1	0	RQO99537.1(hypothetical protein POPTR_014G007050 [Populus trichocarpa])
MSTRG.23642			462	1	0	3	34	0	3	9	33.14	2	2	11	37.44	3	1	2	0	4	7	32	0	5	8	41	1	3	4	28	1	1.6667	34.86	7.6667	2	0.3333	4	33.6667	6.3333	RQO99537.1(hypothetical protein POPTR_014G007050 [Populus trichocarpa])
MSTRG.23650			421	69.87	162.88	0	91.18	63.93	141.98	33.38	73.95	106.16	93.43	50.46	75.17	154.32	112.24	116.65	151.15	251.01	30.69	104.43	84.15	138.89	1.71	69.82	137.93	220.26	30.81	25.74	79.9867	132.763	80.1	27.9467	127.737	124.41	203.387	66.6633	21.07	PNT02351.1(hypothetical protein POPTR_014G008000 [Populus trichocarpa])	GO:0055114(biological_process:oxidation-reduction process)				ENOG4111JPR(O:Posttranslational modification, protein turnover, chaperones); ENOG410YFY9(O:Posttranslational modification, protein turnover, chaperones)	ENOG4111JPR(AhpC/TSA family); ENOG410YFY9(AhpC/TSA family)
MSTRG.23660			345	0	0	0	1	0	0	0	1	0	0	0	0	1	0	0	0	0	0	0	0	0	0	1	0	0	0	0	0	0	0.6667	0	0.3333	0	0	0.3333	0
MSTRG.23697			219	1	0	0	0	0	0	0	3	0	2	0	1	0	1	0	0	0	1	0	0	0	0	1	0	0	0	0	0.3333	0.6667	1.3333	0	0.3333	0	0	0.3333	0.3333
MSTRG.23777			311	14	7	3	6	5	4	2	2	13	2	7	3	6	8	4	10	10	5	5	9	10	0	3	14	10	6	3	10.6667	4.3333	3.6667	4	6	11	10	3.6667	3.6667	XP_024465643.1(uncharacterized protein LOC112328846 [Populus trichocarpa])					ENOG410Y65V(S:Function unknown); ENOG4111K5V(S:Function unknown)	ENOG410Y65V(Retrotransposon protein); ENOG4111K5V(Reverse transcriptase (RNA-dependent DNA polymerase))
MSTRG.238			890	38	25	9	5	34	25	4	7	32	17	11	9	33	44	46	60	37	5	3	36	15	8	13	39	41	15	11	34.6667	22.3333	7	8	41	45	31	9	9.3333	XP_021684148.1(uncharacterized protein LOC110667567 [Hevea brasiliensis])	GO:0009658(biological_process:chloroplast organization); GO:0032502(biological_process:developmental process); GO:0003690(molecular_function:double-stranded DNA binding); GO:0009507(cellular_component:chloroplast); GO:0006355(biological_process:regulation of transcription, DNA-templated)	K15032	MTERFD		ENOG410XT49(S:Function unknown)	ENOG410XT49(mitochondrial transcription termination)
MSTRG.23803			844	1	0	1	2	0	0	5	0	0	1	4	0	1	0	1	0	1	1	2	0	1	1	1	0	4	2	0	0.3333	0.3333	0.6667	3.3333	0.6667	0	2	1	1.3333
MSTRG.23863			244	5	7	1	4	3	6	2	3	1	7	4	1	4	3	8	4	6	4	2	3	3	12	3	2	8	5	1	3	6.6667	2.6667	2.3333	5	3	5.6667	2	7
MSTRG.23874			774	6	4	5	9	4	2	6	10	6	1	9	5	6	4	4	5	8	8	5	4	5	9	11	10	9	10	3	5.3333	2.3333	8	6.6667	4.6667	6.3333	7.3333	6.3333	9
MSTRG.23876			272	3	6	4	6	0	0	5	12	5	0	2	6	2	2	6	4	2	7	13	3	15	11	12	7	3	16	9	2.6667	2	8	3.6667	3.3333	4.6667	6.6667	11.3333	11.3333
MSTRG.23877			631	7	1	9	11	2	3	8	5	4	1	8	16	5	5	3	4	6	16	9	2	6	11	14	4	8	6	10	4.3333	1.6667	10.6667	8.3333	4.3333	3.3333	6.6667	11	11
MSTRG.23878			354	6	3	8	27	2	1	8	16	3	5	3	19	3	13	4	8	11	16	9	5	15	19	18	12	10	16	15	3.6667	3	20.6667	6.3333	6.6667	8.3333	12	14	17
MSTRG.23925			328	0	0	1	1	0	0	0	3	0	0	0	0	0	0	0	1	0	0	1	0	0	0	3	0	0	1	2	0	0	1.3333	0.3333	0	0.3333	0	2	0.3333
MSTRG.23944			230	3	4.49	1	7.84	1.89	6.69	3	6.2	1.77	5.77	4.02	10.72	6.87	5.67	6.61	2	5	5.64	13.01	3.6	4.76	4.54	7.42	4.31	12.6	4	0	2.22	5.65	8.2533	2.6733	6.3833	3.3033	7.4533	6.81	4.7267	XP_024441006.1(uncharacterized protein LOC18105072 isoform X1 [Populus trichocarpa] )
MSTRG.23945			490	4	2	4	0	3	5	1	1	14	0	15	0	0	7	1	13	8	8	0	5	0	7	0	16	4	10	0	7	2.3333	0.3333	6.6667	2.6667	11.3333	4	0	8.3333	XP_024440998.1(uncharacterized protein LOC112324125 [Populus trichocarpa] )
MSTRG.24001			315	0	0	0	0	1	0	0	0	2	0	0	0	0	0	0	0	0	0	0	2	0	0	0	2	0	0	0	1	0	0	0	0	1.3333	0	0	0
MSTRG.2401			1663	74	104	71	130	45	122	96	118	45	115	84	139	97	98	120	63	138	112	159	41	106	109	156	63	108	91	155	54.6667	113.667	129	83.6667	105	55.6667	117.333	156.667	104	XP_002298728.1(protein ANTAGONIST OF LIKE HETEROCHROMATIN PROTEIN 1 [Populus trichocarpa] )					ENOG411206Y(S:Function unknown)	ENOG411206Y(transposon protein)	PF13359.6(DDE_Tnp_4:DDE superfamily endonuclease)	sp|Q94K49|ALP1_ARATH(Protein ANTAGONIST OF LIKE HETEROCHROMATIN PROTEIN 1 OS=Arabidopsis thaliana OX=3702 GN=ALP1 PE=1 SV=1)
MSTRG.24020			1418	18	9	15	5	14	14	13	7	30	21	25	12	21	24	15	7	8	21	4	24	17	21	5	28	12	19	3	20.6667	14.6667	8	17.6667	20	19.6667	12.3333	4	20.3333	TKS14703.1(hypothetical protein D5086_0000047770 [Populus alba])	GO:0016021(cellular_component:integral component of membrane); GO:0005789(cellular_component:endoplasmic reticulum membrane)				COG5066(U:Intracellular trafficking, secretion, and vesicular transport)	COG5066(Central component in molecular interactions underlying sperm crawling. Forms an extensive filament system that extends from sperm villipoda, along the leading edge of the pseudopod (By similarity))	PF00635.26(Motile_Sperm:MSP (Major sperm protein) domain)	sp|Q84WW5|VAP13_ARATH(Vesicle-associated protein 1-3 OS=Arabidopsis thaliana OX=3702 GN=PVA13 PE=2 SV=1)
MSTRG.24086			361	5	2	11	6	1	1	7	12	5	1	4	11	1	3	2	5	0	4	14	7	2	10	10	6	1	8	14	3.6667	1.3333	9.6667	7.3333	2	6	1	12.6667	7.3333	PNT03440.1(hypothetical protein POPTR_014G071000 [Populus trichocarpa])
MSTRG.24106			361	0.81	1.45	5	0.32	4.64	2	1	2	1	0	3.62	1	0	3	2	7.37	8.66	1	6	7.48	3	4.76	6.68	3.44	5.83	8.8	2.87	2.15	1.15	1.1067	3.2067	1.6667	6.0967	5.83	5.1833	4.8533	TKS14621.1(glyoxylate/hydroxypyruvate reductase HPR3-like [Populus alba])	GO:0047964(molecular_function:glyoxylate reductase activity); GO:0016616(molecular_function:oxidoreductase activity, acting on the CH-OH group of donors, NAD or NADP as acceptor); GO:0016618(molecular_function:hydroxypyruvate reductase activity); GO:0051287(molecular_function:NAD binding); GO:0005829(cellular_component:cytosol); GO:0030267(molecular_function:glyoxylate reductase (NADP) activity)	K15919	HPR2_3	map00630(Glyoxylate and dicarboxylate metabolism); map00260(Glycine, serine and threonine metabolism)	COG1052(C:Energy production and conversion)	COG1052(Dehydrogenase)		sp|Q9LE33|HPR3_ARATH(Glyoxylate/hydroxypyruvate reductase HPR3 OS=Arabidopsis thaliana OX=3702 GN=HPR3 PE=2 SV=1)
MSTRG.24108			456	2	0	0	0	0	0	0	0	2	1	0	0	4	6	0	1	0	1	0	1	2	0	0	2	6	0	0	1.3333	0.3333	0	0	3.3333	1.3333	2.6667	0	0.3333
MSTRG.24194			583	1	2	1	1	3	2	2	6	1	1	0	2	7	5	5	6	4	4	5	2	1	6	1	11	4	0	1	1.6667	1.6667	3	1	5.6667	6.3333	3	2.3333	3.3333
MSTRG.24220			258	0	0	0	0	0	0	0	0	0	0	0	0	0	0	0	0	0	0	0	0	0	0	0	0	0	0	0	0	0	0	0	0	0	0	0	0
MSTRG.24221			350	2	2	2	2	3	2	1	0	3	3	2	1	4	6	1	8	2	4	2	1	4	3	0	3	5	2	0	2.6667	2.3333	1	1.6667	3.6667	4	3.6667	0.6667	3
MSTRG.24222			272	1	1	0	0	0	0	0	0	0	0	1	0	2	0	0	0	1	0	1	0	0	0	0	0	0	0	0	0.3333	0.3333	0	0.3333	0.6667	0	0.3333	0.3333	0
MSTRG.2427			488	31	7	21	3	40	7	7	0	40	4	31	2	9	7	1	37	5	21	3	23	5	28	4	35	2	33	2	37	6	1.6667	19.6667	5.6667	31.6667	4	3	27.3333	XP_011045705.1(PREDICTED: GDSL esterase/lipase At1g29670-like [Populus euphratica])	GO:0016788(molecular_function:hydrolase activity, acting on ester bonds)				COG3240(T:Signal transduction mechanisms)	COG3240(Serine Threonine protein kinase)		sp|Q9C7N5|GDL14_ARATH(GDSL esterase/lipase At1g29660 OS=Arabidopsis thaliana OX=3702 GN=At1g29660 PE=1 SV=1)
MSTRG.24302			285	0	0	0	0	0	0	0	3	0	0	0	2	0	0	0	0	0	0	0	0	0	0	1	0	0	2	1	0	0	1.6667	0	0	0	0	0.6667	0.6667
MSTRG.24394			661	5	0	0	0	2	2	0	0	4	4	0	0	5	4	3	2	2	0	0	3	1	0	0	2	2	0	0	3.6667	2	0	0	4	2.3333	1.6667	0	0
MSTRG.24445			2537	160	88	136	174.84	114	98	175	143	197.8	102	188.43	143	129	165	147	157.76	154	179	140.37	175	124	217	159.38	202.3	114	232	153	157.267	96	153.613	166.477	147	178.353	130.667	150.917	209.333	XP_002320261.3(uncharacterized protein LOC7455393 [Populus trichocarpa])	GO:0008270(molecular_function:zinc ion binding)				ENOG410YFHW(S:Function unknown); ENOG410YK0G(S:Function unknown)	ENOG410YFHW(transposon protein); ENOG410YK0G(ZnF_PMZ)	PF03108.15(DBD_Tnp_Mut:MuDR family transposase); PF10551.9(MULE:MULE transposase domain); PF04434.17(SWIM:SWIM zinc finger); PF00564.24(PB1:PB1 domain)	sp|Q6NQJ7|FRS4_ARATH(Protein FAR1-RELATED SEQUENCE 4 OS=Arabidopsis thaliana OX=3702 GN=FRS4 PE=2 SV=2)
MSTRG.2446			1145	61.35	60.77	23.12	67.73	59.19	84.38	55.56	66.47	49.74	129.76	30.1	65.63	124.11	151.36	169.37	88.48	128.74	20.65	89.97	45.46	109.8	42.99	78.92	73.11	117.99	13.84	48.56	56.76	91.6367	66.61	36.26	148.28	69.0167	118.843	72.4833	25.8267	RQO89780.1(hypothetical protein POPTR_004G232250 [Populus trichocarpa])	GO:0016021(cellular_component:integral component of membrane); GO:0015074(biological_process:DNA integration); GO:0008270(molecular_function:zinc ion binding); GO:0003676(molecular_function:nucleic acid binding); GO:0004672(molecular_function:protein kinase activity); GO:0005524(molecular_function:ATP binding)						PF17921.1(Integrase_H2C2:Integrase zinc binding domain); PF00665.26(rve:Integrase core domain)	sp|Q7LHG5|YI31B_YEAST(Transposon Ty3-I Gag-Pol polyprotein OS=Saccharomyces cerevisiae (strain ATCC 204508 / S288c) OX=559292 GN=TY3B-I PE=3 SV=2)
MSTRG.24481			1167	2	5	9	12	8	13	14	5	7	14	20	9	21	18	19	6	22	16	12	11	16	19	13	11	21	24	10	5.6667	10.6667	8.6667	14.3333	19.3333	9.3333	19.6667	11.6667	19.6667
MSTRG.24511			630	40	34	70	63	44	33	73	60	58	38	78	56	54	62	44	65	63	97	69	67	44	89	67	72	63	96	40	47.3333	35	59.6667	73.6667	53.3333	68	56.6667	58.6667	94	XP_028186596.1(pentatricopeptide repeat-containing protein At3g62470, mitochondrial-like [Glycine soja])	GO:0016021(cellular_component:integral component of membrane)				ENOG410Z7Z7(L:Replication, recombination and repair)	ENOG410Z7Z7(that it carries out the mismatch recognition step. This protein has a weak ATPase activity (By similarity))
MSTRG.24545			397	4	7	14	14	3	11	21	23	6	18	21	29	28	10	12	5	12	22	18	6	13	16	32	7	19	26	20	4.3333	12	22	18.6667	16.6667	6	14.6667	23.3333	21.3333
MSTRG.2458			245	0	0	0	0	0	1	0	0	0	0	0	0	0	0	0	6	1	0	0	0	0	0	1	1	2	0	0	0	0.3333	0	0	0	2.3333	1	0.3333	0
MSTRG.24679			310	0	0	0	2	0	3	0	2	0	1	1	0	1	1	1	1	0	7	0	0	5	1	0	0	2	11	3	0	1.3333	1.3333	0.3333	1	0.3333	2.3333	1	6.3333	PNT04743.1(hypothetical protein POPTR_014G139800, partial [Populus trichocarpa])	GO:0008270(molecular_function:zinc ion binding)				ENOG410Z7Z7(J:Translation, ribosomal structure and biogenesis)	ENOG410Z7Z7(cleavage and polyadenylation)		sp|Q3E6Q1|PPR32_ARATH(Pentatricopeptide repeat-containing protein At1g11290, chloroplastic OS=Arabidopsis thaliana OX=3702 GN=PCMP-H40 PE=2 SV=1)
MSTRG.24700			414	4	3	2	2	1	2	0	0	7	3	2	0	1	2	7	8	1	0	2	5	0	1	0	2	4	1	0	4	2.6667	0.6667	1.3333	3.3333	5	1.6667	0.6667	0.6667	RQP00150.1(hypothetical protein POPTR_014G142350 [Populus trichocarpa] )	GO:0006099(biological_process:tricarboxylic acid cycle); GO:0015977(biological_process:carbon fixation); GO:0008964(molecular_function:phosphoenolpyruvate carboxylase activity)	K01595	ppc	map00620(Pyruvate metabolism); map00710(Carbon fixation in photosynthetic organisms)	COG2352(C:Energy production and conversion)	COG2352(phosphoenolpyruvate carboxylase activity)	PF00311.17(PEPcase:Phosphoenolpyruvate carboxylase)	sp|Q9FV65|CAPPC_FLATR(Phosphoenolpyruvate carboxylase 2 OS=Flaveria trinervia OX=4227 GN=PPCC PE=1 SV=1)
MSTRG.24747			527	4	2	11	10	5	5	4	8	11	6	10	11	5	7	5	14	8	4	7	8	1	4	17	5	1	5	7	6.6667	4.3333	9.6667	8.3333	5.6667	9	3.3333	10.3333	4.3333	XP_011000027.1(PREDICTED: uncharacterized WD repeat-containing protein C2A9.03-like isoform X3 [Populus euphratica])
MSTRG.24789			223	0	0	0	2	1	0	0	2	0	1	0	0	2	0	2	0	0	0	0	0	0	0	1	0	5	1	1	0.3333	0.3333	1.3333	0	1.3333	0	1.6667	0.6667	0.3333
MSTRG.24839			306	3	0	6	1	1	2	7	1	5	0	4	1	0	1	0	2	0	3	1	3	0	2	2	6	0	5	1	3	0.6667	1	5.6667	0.3333	3.6667	0	1.3333	3.3333	XP_024441024.1(uncharacterized protein LOC18105343 [Populus trichocarpa])					ENOG410YDPY(S:Function unknown)	ENOG410YDPY(-)
MSTRG.24893			2885	191	137	149	212	115	165	153	192	152	159	129	275	191	230	234	150	162	167	234	136	206	177	230	162.9	239	132	161	152.667	153.667	226.333	143.667	218.333	149.633	202.333	208.333	158.667	TKS18430.1(hypothetical protein D5086_0000000990 [Populus alba])					ENOG410YC97(S:Function unknown)	ENOG410YC97(Serine threonine-protein phosphatase 7 long form)	PF10536.9(PMD:Plant mobile domain)	sp|F4IFD0|MAIL2_ARATH(Protein MAIN-LIKE 2 OS=Arabidopsis thaliana OX=3702 GN=At2g04865 PE=1 SV=1)
MSTRG.24919			480	12	14	14	30	10	17	22	20	24	17	28	25	15	20	4	28	15	17	30	20	13	30	23	24	11	19	12	15.3333	16	25	21.3333	13	24	13	21.6667	22
MSTRG.2492			358	0	1	0	0	0	1	0	4	2	1	1	1	2	0	0	0	2	0	1	0	0	0	1	1	2	0	1	0.6667	1	1.6667	0.3333	0.6667	0.3333	1.3333	1	0	PNT57733.1(hypothetical protein POPTR_001G317800 [Populus trichocarpa])	GO:0016021(cellular_component:integral component of membrane)				ENOG410Z7NH(S:Function unknown)	ENOG410Z7NH(-)
MSTRG.24983			771	171	224	179	224	143	232	209	257	220	294	183	268	286	291	303	187	322	224	237	162	336	205	275	180	335	159	184	178	250	249.667	190.333	293.333	176.333	331	232	196	XP_011009622.1(PREDICTED: ubiquitin-like-conjugating enzyme ATG10 isoform X1 [Populus euphratica] )	GO:0006914(biological_process:autophagy); GO:0051321(biological_process:meiotic cell cycle)	K17888	ATG10L, ATG10		ENOG4111W4Q(S:Function unknown)	ENOG4111W4Q(autophagy related 10)	PF03987.15(Autophagy_act_C:Autophagocytosis associated protein, active-site domain)	sp|Q8VZ52|ATG10_ARATH(Ubiquitin-like-conjugating enzyme ATG10 OS=Arabidopsis thaliana OX=3702 GN=ATG10 PE=1 SV=1)
MSTRG.25002			486	17	15	5	4	11	16.27	6	5	20	9	7.28	4	29	35.36	16.37	17	15	9	7	13	23	10.32	6	9.19	21	10	2	16	13.4233	4.3333	6.0933	26.91	13.0633	19.6667	5	9.7733	KDO37201.1(hypothetical protein CISIN_1g019829mg [Citrus sinensis])	GO:0004222(molecular_function:metalloendopeptidase activity); GO:0005524(molecular_function:ATP binding); GO:0009507(cellular_component:chloroplast)				ENOG410YFKF(S:Function unknown)	ENOG410YFKF(stress regulated protein)
MSTRG.25003			346	4	4	1	4	0	7	12	3	2	4	2	2	3	5	4	9	2	5	6	2	3	1	3	3	6	2	4	2	5	3	5	4	4.6667	3.6667	4.3333	2.6667	CAN80061.1(hypothetical protein VITISV_007942 [Vitis vinifera])	GO:0009555(biological_process:pollen development); GO:0004674(molecular_function:protein serine/threonine kinase activity); GO:0000943(cellular_component:retrotransposon nucleocapsid); GO:0015074(biological_process:DNA integration); GO:0003676(molecular_function:nucleic acid binding); GO:0005886(cellular_component:plasma membrane); GO:0005524(molecular_function:ATP binding)	K07739	ELP3, KAT9					sp|P10978|POLX_TOBAC(Retrovirus-related Pol polyprotein from transposon TNT 1-94 OS=Nicotiana tabacum OX=4097 PE=2 SV=1)
MSTRG.25010			285	2	2	2	3	0	0	0	3	0	0	3	0	0	2	1	1	0	0	1	0	0	4	0	6	1	2	0	0.6667	0.6667	2	1.6667	1	2.3333	0.3333	0.3333	2
MSTRG.25011			240	1	0	0	1	1	1	2	2	0	0	1	0	0	3	1	1	0	3	0	1	0	1	0	2	1	0	1	0.6667	0.3333	1	1	1.3333	1.3333	0.3333	0.3333	1.3333
MSTRG.25018			200	0	0	0	0	0	4	0	0	0	0	0	0	0	0	0	0	0	0	0	0	0	0	0	0	0	0	0	0	1.3333	0	0	0	0	0	0	0
MSTRG.25022			887	12	12	6	4	14	12	2	2	4	16	2	9	23	22	21	13	13	7	8	15	18	3	10	28	21	3	7	10	13.3333	5	3.3333	22	18.6667	17.3333	8.3333	4.3333
MSTRG.25041			207	0	0	0	0	0	0	0	0	0	0	0	0	0	0	0	0	0	0	0	0	0	0	4	0	0	1	1	0	0	0	0	0	0	0	1.6667	0.3333	XP_024453248.1(uncharacterized protein LOC112326930 [Populus trichocarpa])
MSTRG.25042			622	23.85	6.05	34.02	69.74	26.05	24.87	44.5	64.42	23	18	45	75.06	17.56	25	12	13.44	24.02	44.27	61.73	24	17.88	36	82.9	29.41	14.86	41.94	61.22	24.3	16.3067	69.74	41.1733	18.1867	22.2833	18.92	68.6167	40.7367	XP_024453248.1(uncharacterized protein LOC112326930 [Populus trichocarpa])	GO:0015074(biological_process:DNA integration); GO:0005634(cellular_component:nucleus); GO:0016021(cellular_component:integral component of membrane); GO:0008270(molecular_function:zinc ion binding); GO:0003676(molecular_function:nucleic acid binding)	K13691	SGT1		COG1819(S:Function unknown)	COG1819(Transferase)
MSTRG.25045			266	18.36	10.06	5	11.47	8.38	18.48	11.6	6.93	10.54	11.84	6.5	9.65	22.5	17.58	20.14	8	14.94	10.42	9.31	8.07	8.28	5.27	4.42	3	7.98	4.47	4.64	12.4267	13.46	9.35	7.7	20.0733	6.3567	10.4	6.1233	6.72	PNT50885.1(hypothetical protein POPTR_002G212300 [Populus trichocarpa])
MSTRG.25046			206	0	0	0	0	0	0	0	0	0	0	0	0	0	0	0	0	0	0	0	0	0	0	0	0	0	0	1	0	0	0	0	0	0	0	0.3333	0	TKR58183.1(hypothetical protein D5086_0000328500, partial [Populus alba])	GO:0046658(cellular_component:anchored component of plasma membrane); GO:0005975(biological_process:carbohydrate metabolic process); GO:0004553(molecular_function:hydrolase activity, hydrolyzing O-glycosyl compounds)				ENOG410YAGI(G:Carbohydrate transport and metabolism)	ENOG410YAGI(glucan endo-1,3-beta-glucosidase)	PF00332.18(Glyco_hydro_17:Glycosyl hydrolases family 17)	sp|Q9M069|E137_ARATH(Glucan endo-1,3-beta-glucosidase 7 OS=Arabidopsis thaliana OX=3702 GN=At4g34480 PE=1 SV=2)
MSTRG.25088			217	1.96	2.98	1	0	1	0	0	0	0	3	1	2	1	1	1.96	1.97	0	1	0	2	0	4	0	0	1	0	0	0.9867	1.9933	0.6667	0.6667	1.32	1.3233	0.3333	0	1.6667	PNS90743.1(hypothetical protein POPTR_019G059700, partial [Populus trichocarpa])					ENOG41118UH(S:Function unknown)	ENOG41118UH(-)
MSTRG.25089			208	2	0	0	1.75	1	2	0	1	1	0	0	0	2.97	1.53	0	2.97	0	0	1	0	4.67	2.71	0	1.99	1	2	1	1.3333	0.6667	0.9167	0	1.5	1.6533	1.89	0.6667	1.57
MSTRG.25090			237	0	0	5	0	0	3	0	0	0	0	0	2	0	0	0	0	0	0	0	0	3	1	0	2	0	0	0	0	1	0.6667	1.6667	0	0.6667	1	0	0.3333	XP_024463329.1(uncharacterized protein LOC112328490 [Populus trichocarpa])	GO:0015074(biological_process:DNA integration); GO:0003676(molecular_function:nucleic acid binding)	K01303	APEH				PF17917.1(RT_RNaseH:RNase H-like domain found in reverse transcriptase)	sp|P04323|POL3_DROME(Retrovirus-related Pol polyprotein from transposon 17.6 OS=Drosophila melanogaster OX=7227 GN=pol PE=4 SV=1)
MSTRG.25091			737	10.4	8.79	3.66	10.42	6.3	3.04	8.02	3.36	3.96	4.31	9.04	11.06	21.99	5.95	18.64	6.4	16.45	5.48	4.55	7	27.01	13.16	10.92	19.62	18.43	14.52	4.79	6.8867	5.38	8.28	6.9067	15.5267	11.0067	20.63	6.7533	11.0533	XP_024463329.1(uncharacterized protein LOC112328490 [Populus trichocarpa])	GO:0003887(molecular_function:DNA-directed DNA polymerase activity); GO:0015074(biological_process:DNA integration); GO:0003676(molecular_function:nucleic acid binding)						PF00665.26(rve:Integrase core domain)	sp|Q2F7J3|POL_XMRV3(Gag-Pol polyprotein OS=Xenotropic MuLV-related virus (isolate VP35) OX=356663 GN=gag-pol PE=1 SV=1)
MSTRG.25101			334	2	12	0	2	2	3	0	3	1	11	0	5	10	7	4	9	1	0	7	5	9	0	7	2	10	0	12	1.6667	8.6667	3.3333	0	7	5.3333	6.6667	8.6667	0	XP_025012109.1(uncharacterized protein LOC112533883 [Ricinus communis])	GO:0000943(cellular_component:retrotransposon nucleocapsid); GO:0015074(biological_process:DNA integration); GO:0008270(molecular_function:zinc ion binding); GO:0003676(molecular_function:nucleic acid binding)				ENOG410ZXEB(S:Function unknown)	ENOG410ZXEB(Integrase core domain)	PF14223.6(Retrotran_gag_2:gag-polypeptide of LTR copia-type)
MSTRG.25102			386	0	6	0	1	0	2	0	2	0	7	0	1	5	4	5	0	2	0	2	0	6	0	6	1	4	0	10	0	5	1.3333	0	4.6667	0.3333	4	6	0	PNX85069.1(retrotransposon-related protein [Trifolium pratense])	GO:0000943(cellular_component:retrotransposon nucleocapsid); GO:0003964(molecular_function:RNA-directed DNA polymerase activity); GO:0008270(molecular_function:zinc ion binding); GO:0003676(molecular_function:nucleic acid binding); GO:0015074(biological_process:DNA integration)				COG2801(S:Function unknown); ENOG410XS4D(S:Function unknown)	COG2801(Integrase core domain); ENOG410XS4D(Retrotransposon protein)		sp|P10978|POLX_TOBAC(Retrovirus-related Pol polyprotein from transposon TNT 1-94 OS=Nicotiana tabacum OX=4097 PE=2 SV=1)
MSTRG.25135			706	5.81	0	10.32	7.3	3.77	5.23	10.08	4.95	9.4	9.87	7.92	1.02	8.01	7.57	0.99	6.79	5.09	9.14	4.9	9.62	5.16	9.01	18.39	4.95	4.47	3.46	7	6.3267	5.0333	4.4233	9.44	5.5233	7.12	4.9067	10.0967	7.2033	XP_002321344.1(probable ribonuclease P/MRP protein subunit POP5 isoform X2 [Populus trichocarpa] )	GO:0090502(biological_process:RNA phosphodiester bond hydrolysis, endonucleolytic); GO:0004526(molecular_function:ribonuclease P activity); GO:0008033(biological_process:tRNA processing); GO:0000172(cellular_component:ribonuclease MRP complex); GO:0004540(molecular_function:ribonuclease activity); GO:0005655(cellular_component:nucleolar ribonuclease P complex); GO:0006364(biological_process:rRNA …	K03537	POP5	map03008(Ribosome biogenesis in eukaryotes); map03013(RNA transport)	COG1369(J:Translation, ribosomal structure and biogenesis)	COG1369(Part of ribonuclease P, a protein complex that generates mature tRNA molecules by cleaving their 5'-ends (By similarity))	PF01900.19(RNase_P_Rpp14:Rpp14/Pop5 family)	sp|Q6AWV1|POP5_ARATH(Probable ribonuclease P/MRP protein subunit POP5 OS=Arabidopsis thaliana OX=3702 GN=EMB1687 PE=2 SV=1)
MSTRG.25136			282	19.98	13.42	20.59	16.03	13.79	16.1	13.79	14.22	19.63	16.45	19.98	19.4	19.36	15.72	11.61	8.81	9.31	9.86	9.52	9.37	12.74	22.24	13.3	12.52	13.69	22.31	7.92	17.8	15.3233	16.55	18.12	15.5633	10.2333	11.9133	10.2467	18.1367	ABK92972.1(unknown [Populus trichocarpa])	GO:0090502(biological_process:RNA phosphodiester bond hydrolysis, endonucleolytic); GO:0004526(molecular_function:ribonuclease P activity); GO:0008033(biological_process:tRNA processing); GO:0000172(cellular_component:ribonuclease MRP complex); GO:0004540(molecular_function:ribonuclease activity); GO:0005655(cellular_component:nucleolar ribonuclease P complex); GO:0006364(biological_process:rRNA …	K03537	POP5	map03008(Ribosome biogenesis in eukaryotes); map03013(RNA transport)	COG1369(J:Translation, ribosomal structure and biogenesis)	COG1369(Part of ribonuclease P, a protein complex that generates mature tRNA molecules by cleaving their 5'-ends (By similarity))
MSTRG.25144			456	18	14	16	7	14	10	13	16	20	14	41	16	5	26	5	22	23	38	14	18	13	32	31	14	9	20	13	17.3333	12.6667	13	23.3333	12	18	15	19.3333	30	TKR71400.1(hypothetical protein D5086_0000301740 [Populus alba])
MSTRG.25156			608	7.64	3.67	5.88	7.51	7.66	6	10.26	15	6.68	8.14	2.55	11	12.75	18.01	11	9.98	9.79	5.98	5.91	4.96	10.09	1	16.87	12.07	9	2.89	12.64	7.3267	5.9367	11.17	6.23	13.92	9.0033	9.6267	11.8067	3.29	RQO93894.1(hypothetical protein POPTR_T131101 [Populus trichocarpa])	GO:0000943(cellular_component:retrotransposon nucleocapsid); GO:0016021(cellular_component:integral component of membrane); GO:0015074(biological_process:DNA integration); GO:0008270(molecular_function:zinc ion binding); GO:0003676(molecular_function:nucleic acid binding); GO:0003964(molecular_function:RNA-directed DNA polymerase activity)	K01886	QARS, glnS	map00970(Aminoacyl-tRNA biosynthesis)	ENOG410ZRQR(S:Function unknown); COG2801(S:Function unknown); ENOG410ZPTD(S:Function unknown)	ENOG410ZRQR(-); COG2801(-); ENOG410ZPTD(Zinc knuckle)	PF00098.23(zf-CCHC:Zinc knuckle)	sp|P10978|POLX_TOBAC(Retrovirus-related Pol polyprotein from transposon TNT 1-94 OS=Nicotiana tabacum OX=4097 PE=2 SV=1)
MSTRG.25157			279	0	2	3	1	0	0	0	2	0	0	0	0	2	1	1	1	1	0	0	0	6	0	0	2	2	0	0	0	0.6667	1	1	1.3333	1	3	0	0	PKI65872.1(hypothetical protein CRG98_013735 [Punica granatum])	GO:0000943(cellular_component:retrotransposon nucleocapsid); GO:0015074(biological_process:DNA integration); GO:0008270(molecular_function:zinc ion binding); GO:0003676(molecular_function:nucleic acid binding)	K03006	RPB1, POLR2A	map00240(Pyrimidine metabolism); map03020(RNA polymerase); map00230(Purine metabolism)	COG2801(L:Replication, recombination and repair); ENOG410Y4C5(S:Function unknown); ENOG410ZPTD(S:Function unknown); ENOG410XS4D(S:Function unknown)	COG2801(Retrotransposon protein); ENOG410Y4C5(Retrotransposon protein); ENOG410ZPTD(Zinc knuckle); ENOG410XS4D(Retrotransposon protein)	PF00665.26(rve:Integrase core domain); PF13683.6(rve_3:Integrase core domain)	sp|P10978|POLX_TOBAC(Retrovirus-related Pol polyprotein from transposon TNT 1-94 OS=Nicotiana tabacum OX=4097 PE=2 SV=1)
MSTRG.25198			587	14	12	14	23	10	15	16	22	17	25	16	35	21	18	20	24	19	24	14	7	25	13	23	22	20	17	12	13.6667	17.3333	26.6667	15.3333	19.6667	17.6667	21.3333	16.3333	18	PNS99755.1(hypothetical protein POPTR_015G008800 [Populus trichocarpa])	GO:0016021(cellular_component:integral component of membrane); GO:0030170(molecular_function:pyridoxal phosphate binding)	K06997	yggS, PROSC		COG0325(S:Function unknown)	COG0325(alanine racemase domain protein)		sp|Q1ZXI6|PLPHP_DICDI(Pyridoxal phosphate homeostasis protein OS=Dictyostelium discoideum OX=44689 GN=prosc PE=3 SV=2)
MSTRG.25199			396	0	0	0	0	0	0	0	0	0	0	0	0	0	0	0	0	0	0	0	0	0	0	0	0	0	0	0	0	0	0	0	0	0	0	0	0
MSTRG.25209			804	5	0	0	2	2	0	0	0	0	1	0	0	0	0	2	5	1	0	0	3	1	1	0	1	1	0	0	2.3333	0.3333	0.6667	0	0.6667	3	1	0	0.3333	PNS99777.1(hypothetical protein POPTR_015G010000 [Populus trichocarpa])	GO:0016021(cellular_component:integral component of membrane)
MSTRG.25248			697	51.27	36.37	44.01	52.08	42.33	58.6	47.12	39.67	69.53	72.86	68.17	46.23	58.13	86.18	58.19	53.28	89.94	70.43	42.87	57.57	86.93	79.57	69.48	78.05	62.2	59.86	31.8	54.3767	55.9433	45.9933	53.1	67.5	62.9667	79.69	48.05	69.9533	XP_024465831.1(uncharacterized protein LOC112328878 [Populus trichocarpa])					ENOG410YEW3(S:Function unknown)	ENOG410YEW3(Protein of unknown function (DUF1664))
MSTRG.25265			458	7.22	0	13.67	0	0	0	27.15	2.81	3.82	23.43	0	11.16	8.8	0	12.09	8.94	10.67	0	8.08	17.54	0	11.42	0	1.23	10.17	0	0	3.68	7.81	4.6567	13.6067	6.9633	9.2367	6.9467	2.6933	3.8067	PNT43355.1(hypothetical protein POPTR_003G029800 [Populus trichocarpa])	GO:0016021(cellular_component:integral component of membrane)
MSTRG.253			329	3.5	0	11.42	3.97	5	2	1.53	0	6.79	4	7.48	1	0	7.68	0.72	1.8	8.78	4.67	1	4	8.49	6.56	3.29	4.48	3	5.47	0	5.0967	2	1.6567	6.81	2.8	3.4267	6.7567	1.43	5.5667
MSTRG.25329			603	8	3	20	4	14	5	17	14	23	7	19	10	6	15	7	12	5	19	2	13	4	27	3	31	3	21	6	15	5	9.3333	18.6667	9.3333	18.6667	4	3.6667	22.3333
MSTRG.25373			1161	1	1	3	6	2	3	1	1	2	2	5	4	4	4	2	2	4	1	1	8	2	5	6	4	5	3	6	1.6667	2	3.6667	3	3.3333	4.6667	3.6667	4.3333	3
MSTRG.25374			435	2	6	1	5	2	2	5	0	1	0	3	2	1	2	0	0	2	4	2	3	3	5	2	5	3	3	2	1.6667	2.6667	2.3333	3	1	2.6667	2.6667	2	4
MSTRG.25375			1404	20	3	12	10	14	6	13	6	15	13	12	9	12	19	15	27	11	17	11	18	28	15	15	25	22	26	19	16.3333	7.3333	8.3333	12.3333	15.3333	23.3333	20.3333	15	19.3333	XP_011000721.1(PREDICTED: N-alpha-acetyltransferase 40 isoform X1 [Populus euphratica])	GO:0043998(molecular_function:H2A histone acetyltransferase activity); GO:0010485(molecular_function:H4 histone acetyltransferase activity)	K20794	NAA40, NAT4		ENOG4110YSF(S:Function unknown)	ENOG4110YSF(N(alpha)-acetyltransferase 40, NatD catalytic subunit, homolog (S. cerevisiae))
MSTRG.25417			1579	63	31	101	84	82	51	103	101	115	51	134	123	67	87	74	91	65	160	103	57.07	86	120	130	94	67	127	98	86.6667	44.3333	102.667	112.667	76	80.69	72.6667	110.333	135.667	XP_024441896.1(putative nuclease HARBI1 isoform X1 [Populus trichocarpa])					ENOG411206Y(S:Function unknown)	ENOG411206Y(transposon protein)	PF13359.6(DDE_Tnp_4:DDE superfamily endonuclease); PF04827.14(Plant_tran:Plant transposon protein)
MSTRG.25424			276	15	6	6	19	6	19	21	21	16	19	19	22	23	17	9	13	17	13	22	15	20	24	20	19	20	17	18	12.3333	14.6667	20.6667	15.3333	16.3333	15.6667	19	20	18	TKR63958.1(protection of telomeres 1 protein [Populus alba])	GO:0043047(molecular_function:single-stranded telomeric DNA binding); GO:0000723(biological_process:telomere maintenance); GO:0000784(cellular_component:nuclear chromosome, telomeric region)				ENOG410Z1J0(S:Function unknown)	ENOG410Z1J0(protection of telomeres 1 homolog (S. pombe))
MSTRG.25425			483	13	11	4	28	8	13	14	17	21	9	17	14	12	14	20	18	11	26	10	5	12	21	20	19	13	12	7	14	11	19.6667	11.6667	15.3333	14	12	12.3333	19.6667	XP_011039144.1(PREDICTED: protection of telomeres protein 1b-like [Populus euphratica])	GO:0043047(molecular_function:single-stranded telomeric DNA binding); GO:0000723(biological_process:telomere maintenance); GO:0000784(cellular_component:nuclear chromosome, telomeric region)				ENOG410Z1J0(S:Function unknown)	ENOG410Z1J0(protection of telomeres 1 homolog (S. pombe))
MSTRG.25442			350	0	1	0	1	0	0	1	1	0	0	1	8	0	3	0	3	1	0	1	0	0	0	3	0	0	0	2	0	0.3333	3.3333	0.6667	1	1	0.3333	2	0
MSTRG.25452			746	42	12	21	38	40	17	21	54	60	24	45	44	13	41	21	38	16	62	43	56	19	61	55	78	27	76	42	47.3333	17.6667	45.3333	29	25	57.3333	20.6667	46.6667	66.3333
MSTRG.25466			209	1	0	0	0	0	4	0	0	1	0	0	0	1	0	2	1	0	2	0	0	1	0	0	0	1	0	0	0.6667	1.3333	0	0	1	0.3333	0.6667	0	0.6667	XP_020550342.1(uncharacterized protein LOC110012142 [Sesamum indicum])
MSTRG.25470			277	0	0	0	0	0	0	0	0	0	0	0	0	0	0	0	0	0	0	0	0	0	0	0	0	0	2.53	0	0	0	0	0	0	0	0	0	0.8433	TKR90350.1(TMV resistance protein N [Populus alba])	GO:0016021(cellular_component:integral component of membrane); GO:0007165(biological_process:signal transduction); GO:0043531(molecular_function:ADP binding)				COG4886(A:RNA processing and modification)	COG4886(polyA polymerase)
MSTRG.25473			326	0	0	4	2	0	2	2	0	1	1	3	0	1	1	0	0	0	5	0	2	1	1	0	0	2	0	0	0.3333	1	0.6667	3	0.6667	0.6667	1	0	2	XP_011004081.1(PREDICTED: uncharacterized protein LOC105110676 isoform X1 [Populus euphratica])	GO:0044255(biological_process:cellular lipid metabolic process); GO:0016298(molecular_function:lipase activity)				ENOG410XRUP(S:Function unknown)	ENOG410XRUP(leucine Rich Repeat)
MSTRG.25477			285	1	1	1	3	1	1	0	2	1	2	1	0	2	2	1	0	1	3	0	1	0	5	2	2	2	0	3	1	1.3333	1.6667	0.6667	1.6667	1	1	1.6667	2.6667	RQP00583.1(hypothetical protein POPTR_015G044201 [Populus trichocarpa])	GO:0016021(cellular_component:integral component of membrane)				ENOG41103TF(S:Function unknown)	ENOG41103TF(-)
MSTRG.25521			206	0	1	1	1	0	0	0	1	0	0	0	0	0	0	0	1	0	2	0	1	0	0	3	0	0	0	0	0	0.3333	0.6667	0.3333	0	0.6667	0	1	0.6667	XP_028798630.1(uncharacterized protein LOC114754062, partial [Prosopis alba])	GO:0015074(biological_process:DNA integration); GO:0003676(molecular_function:nucleic acid binding)				COG2801(K:Transcription)	COG2801(TAF2 RNA polymerase II, TATA box binding protein (TBP)-associated factor)
MSTRG.25522			310	3	0	3	2	1	2	0	1	4	0	1	3	4	3	4.25	1.52	1	2	1.09	3	2	3	1.27	6.27	1.24	2	0	2.6667	0.6667	2	1.3333	3.75	3.5967	1.4133	0.7867	2.3333	XP_011016217.1(PREDICTED: uncharacterized protein LOC105119741 [Populus euphratica])					ENOG4111SPB(S:Function unknown); ENOG410Y65V(S:Function unknown); COG0534(V:Defense mechanisms); ENOG4111XVU(S:Function unknown)	ENOG4111SPB(transposon protein); ENOG410Y65V(Retrotransposon protein); COG0534(Mate efflux family protein); ENOG4111XVU(-)
MSTRG.25523			251	1	4	0	2	2	0	2	2	3	1	9	0	0	2	2	2	3	3	2	1	1	1	2	1	3	2	4	2	1.6667	1.3333	3.6667	1.3333	1.3333	2.3333	2.6667	2	AEN56130.1(ATPase subunit 6 (mitochondrion) [Cucumis melo subsp. melo] )	GO:0045263(cellular_component:proton-transporting ATP synthase complex, coupling factor F(o)); GO:0005743(cellular_component:mitochondrial inner membrane); GO:0016021(cellular_component:integral component of membrane); GO:0015986(biological_process:ATP synthesis coupled proton transport); GO:0015078(molecular_function:hydrogen ion transmembrane transporter activity)	K02126	ATPeF0A, MTATP6, ATP6	map00190(Oxidative phosphorylation); map04714(Thermogenesis)	COG0356(C:Energy production and conversion)	COG0356(it plays a direct role in the translocation of protons across the membrane (By similarity))		sp|Q04654|ATP6_VICFA(ATP synthase subunit a OS=Vicia faba OX=3906 GN=ATP6 PE=3 SV=1)
MSTRG.25527			938	7	3	11	7	2	10	14	7	6	9	7	8	17	13	13	5	2	7	2	11	7	6	7	17	11	6	5	5	7.3333	7.3333	10.6667	14.3333	11	6.6667	4.6667	6.3333
MSTRG.25528			249	0	0	0	4	0	1	0	1	0	0	0	2	2	1	0	0	0	0	1	0	0	0	0	0	0	1	1	0	0.3333	2.3333	0	1	0	0	0.6667	0.3333
MSTRG.25585			271	1	3	0	0	1	4	0	1	2	5	2	0	4	3	0	6	7	0	3	2	2	2	0	6	4	0	0	1.3333	4	0.3333	0.6667	2.3333	4.6667	4.3333	1	0.6667	XP_017231727.1(PREDICTED: uncharacterized protein LOC108206061 [Daucus carota subsp. sativus] )
MSTRG.256			644	1.78	0	0	0	0	0	0	0	0	0	0	0	0	0	0	0	0	0	0	0	1.34	0	0	0	0	0	0	0.5933	0	0	0	0	0	0.4467	0	0	XP_021688407.1(uncharacterized protein LOC110670607 [Hevea brasiliensis])	GO:0008270(molecular_function:zinc ion binding); GO:0003676(molecular_function:nucleic acid binding)				COG2801(L:Replication, recombination and repair); ENOG410YBN4(T:Signal transduction mechanisms)	COG2801(Retrotransposon protein); ENOG410YBN4(G-type lectin S-receptor-like serine threonine-protein kinase)	PF13961.6(DUF4219:Domain of unknown function (DUF4219))
MSTRG.25601			511	1	1	4	0	4	0	7	3	0	0	2	0	0	2	0	3	1	2	1	8	4	4	2	3	4	3	0	1.6667	0.3333	1	4.3333	0.6667	4.6667	3	1	3	RQP00667.1(hypothetical protein POPTR_015G062433 [Populus trichocarpa])
MSTRG.25602			1404	104	117.74	16.92	14	141.01	154	22	21.01	167	162	47	8	134	177.71	170	257.94	327.98	41	24	126.95	174	45	25	177.96	203	45	21	137.337	144.58	14.3367	28.64	160.57	187.617	234.993	23.3333	43.6667	TKS00842.1(hypothetical protein D5086_0000178870 [Populus alba])	GO:0009535(cellular_component:chloroplast thylakoid membrane); GO:0009941(cellular_component:chloroplast envelope); GO:0015995(biological_process:chlorophyll biosynthetic process); GO:0016628(molecular_function:oxidoreductase activity, acting on the CH-CH group of donors, NAD or NADP as acceptor); GO:0045550(molecular_function:geranylgeranyl reductase activity); GO:0015979(biological_process:phot…	K10960	chlP, bchP	map00860(Porphyrin and chlorophyll metabolism); map00900(Terpenoid backbone biosynthesis)	COG0644(C:Energy production and conversion)	COG0644(geranylgeranyl reductase)		sp|Q9CA67|CHLP_ARATH(Geranylgeranyl diphosphate reductase, chloroplastic OS=Arabidopsis thaliana OX=3702 GN=CHLP PE=1 SV=1)
MSTRG.25652			261	0	0	0	0	1	0	0	0	1	0	0	0	0	0	0	0	0	0	0	0	0	0	0	0	0	0	0	0.6667	0	0	0	0	0	0	0	0
MSTRG.25665			500	10	2	8	14	8	13	1	6	12	10	4	9	11	14	6	16	8	8	13	20	9	15	13	11	15	14	8	10	8.3333	9.6667	4.3333	10.3333	15.6667	10.6667	11.3333	12.3333
MSTRG.25666			272	0	2	2	1	1	2	2	4	1	5	5	0	4	2	3	4	5	2	5	7	0	5	2	6	2	2	2	0.6667	3	1.6667	3	3	5.6667	2.3333	3	3
MSTRG.25674			370	1	5	1	5	2	1	1	2	1	1	1	2	1	6	3	0	3	1	1	3	3	3	8	2	2	4	11	1.3333	2.3333	3	1	3.3333	1.6667	2.6667	6.6667	2.6667	XP_002318633.1(uncharacterized protein LOC7483471 [Populus trichocarpa] )	GO:0005737(cellular_component:cytoplasm); GO:0005829(cellular_component:cytosol); GO:0008649(molecular_function:rRNA methyltransferase activity); GO:0070043(molecular_function:rRNA (guanine-N7-)-methyltransferase activity)	K03501	gidB, rsmG		COG0357(M:Cell wall/membrane/envelope biogenesis)	COG0357(Specifically methylates the N7 position of a guanine in 16S rRNA (By similarity))
MSTRG.25695			1042	12	2	4	9	10	1	7	7	4	10	6	11	5	4	8	7	11	5	13	6	10	10	12	24	10	7	11	8.6667	4.3333	9	5.6667	5.6667	12.3333	10.3333	12	7.3333	XP_002308906.1(probable methyltransferase PMT6 [Populus trichocarpa] )	GO:0008168(molecular_function:methyltransferase activity); GO:0016021(cellular_component:integral component of membrane); GO:0005802(cellular_component:trans-Golgi network); GO:0005768(cellular_component:endosome); GO:0005794(cellular_component:Golgi apparatus)				ENOG410YC2G(S:Function unknown)	ENOG410YC2G(methyltransferase)	PF03141.16(Methyltransf_29:Putative S-adenosyl-L-methionine-dependent methyltransferase)	sp|Q84TJ0|PMT6_ARATH(Probable methyltransferase PMT6 OS=Arabidopsis thaliana OX=3702 GN=At3g10200 PE=2 SV=1)
MSTRG.25750			462	1	0	0	4	0	0	1	5	0	0	0	3	2	0	0	1	0	0	9	0	2	2	13	3	1	0	7	0.3333	0	4	0.3333	0.6667	1.3333	1	9.6667	0.6667
MSTRG.25764			241	4.46	9.9	0.95	1	5.41	23.85	0	0.12	4.69	11.58	1.05	0.6	5.69	4.04	1.86	5.08	4.6	1.19	0	2.18	2.45	0.98	0	3.18	2.9	0.1	0	4.8533	15.11	0.5733	0.6667	3.8633	3.48	3.3167	0	0.7567	TKR75142.1(J domain-containing protein required for chloroplast accumulation response 1-like isoform X1 [Populus alba])	GO:0005737(cellular_component:cytoplasm); GO:0043231(cellular_component:intracellular membrane-bounded organelle); GO:0006898(biological_process:receptor-mediated endocytosis); GO:0072583(biological_process:clathrin-dependent endocytosis); GO:0030276(molecular_function:clathrin binding); GO:0031982(cellular_component:vesicle); GO:0072318(biological_process:clathrin coat disassembly)				ENOG410YDET(S:Function unknown)	ENOG410YDET(-)
MSTRG.25766			339	2	0	0	2	0	1	1	1	0	2	2	2	0	2	0	1	0	4	3	2	1	3	1	5	1	0	0	0.6667	1	1.6667	1	0.6667	2.6667	0.6667	1.3333	2.3333
MSTRG.25788			667	1	2	1	0	1	5	0	0	2	2	4	0	0	1	0	1	1	2	1	1	0	7	0	1	0	2	0	1.3333	3	0	1.6667	0.3333	1	0.3333	0.3333	3.6667
MSTRG.25791			518	1	0	1	7	2	0	2	5	3	0	3	13	0	0	0	0	0	4	0	3	0	6	12	2	0	5	5	2	0	8.3333	2	0	1.6667	0	5.6667	5
MSTRG.2585			522	0	0	4	0	0	0	0	0	0	0	0	0	0	0	0	0	0	3	0	0	0	0	0	0	0	1	0	0	0	0	1.3333	0	0	0	0	1.3333	RQO85634.1(hypothetical protein POPTR_001G331050 [Populus trichocarpa])
MSTRG.25929			278	4.47	4.16	3.85	0	3.12	9.15	10.24	0	6.81	2.82	7.93	0.87	7.92	30.15	17.2	8.16	6.07	12.72	0	5.53	2.12	9.86	0	5.65	3.46	9.48	0	4.8	5.3767	0.29	7.34	18.4233	6.4467	3.8833	0	10.6867	XP_011037712.1(PREDICTED: thiamine thiazole synthase 2, chloroplastic-like [Populus euphratica])	GO:0009228(biological_process:thiamine biosynthetic process); GO:0009570(cellular_component:chloroplast stroma); GO:0005829(cellular_component:cytosol); GO:0052837(biological_process:thiazole biosynthetic process); GO:0016763(molecular_function:transferase activity, transferring pentosyl groups); GO:0005506(molecular_function:iron ion binding)	K03146	THI4, THI1	map00730(Thiamine metabolism)	COG1635(H:Coenzyme transport and metabolism)	COG1635(Involved in biosynthesis of the thiamine precursor thiazole. Catalyzes the conversion of NAD and glycine to adenosine diphosphate 5-(2-hydroxyethyl)-4-methylthiazole-2-carboxylic acid (ADT), an adenylated thiazole intermediate. The reaction includes an iron-dependent sulfide transfer from a conserved cysteine residue of the protein to a thiazole intermediate. The enzyme can only undergo a…	PF01946.17(Thi4:Thi4 family)	sp|F6H7K5|THI42_VITVI(Thiamine thiazole synthase 2, chloroplastic OS=Vitis vinifera OX=29760 GN=THI1-2 PE=3 SV=1)
MSTRG.25964			386	3	0	0	0	2	0	2	0	2	0	0	1	0	0	2	8	0	0	1	0	4	1	2	0	3	2	0	2.3333	0	0.3333	0.6667	0.6667	2.6667	2.3333	1	1
MSTRG.25967			230	1.81	0	3	0	0	0	0	0	0.89	0	0	0	0	1.73	0	1	0	1	0	1	2	0	0	1	0	1	2	0.9	0	0	1	0.5767	1	0.6667	0.6667	0.6667	AAX33323.1(secondary cell wall-related glycosyltransferase family 14 [Populus tremula x Populus tremuloides])	GO:0008375(molecular_function:acetylglucosaminyltransferase activity); GO:0016021(cellular_component:integral component of membrane); GO:0016020(cellular_component:membrane)				ENOG410XQ7M(U:Intracellular trafficking, secretion, and vesicular transport)	ENOG410XQ7M(mitochondrial import inner membrane translocase, subunit)		sp|Q9FLD7|GT14A_ARATH(Beta-glucuronosyltransferase GlcAT14A OS=Arabidopsis thaliana OX=3702 GN=GLCAT14A PE=2 SV=1)
MSTRG.25973			225	5	1.79	0	0	0.67	0.86	0	0.52	1.69	1.43	2.87	1.48	0	3.85	2.51	1.61	6.55	2.65	1.04	0	0	1.03	1.87	9.05	5.39	2.6	1.6	2.4533	1.36	0.6667	0.9567	2.12	3.5533	3.98	1.5033	2.0933	TKR90035.1(regulator of chromosome condensation family protein [Populus alba])					COG5184(D:Cell cycle control, cell division, chromosome partitioning); COG5184(Z:Cytoskeleton)	COG5184(regulator of chromosome condensation); COG5184(regulator of chromosome condensation)	PF00415.18(RCC1:Regulator of chromosome condensation (RCC1) repeat)
MSTRG.25985			626	77	4	6	0	31	0	3	0	32	3	0	1	2	1	1	18	6	0	3	10	0	0	1	0	1	0	0	46.6667	2.3333	0.3333	3	1.3333	9.3333	2.3333	1.3333	0
MSTRG.26003			807	0	0	1	57.43	0	1	1.54	31.38	0	0	0	60.11	1	4	0	1	0	2.26	59.44	2	0	1	56.14	0	0	0	56.42	0	0.3333	49.64	0.8467	1.6667	1	0	57.3333	1.0867	XP_006374588.1(light-harvesting complex-like protein 3 isotype 1, chloroplastic [Populus trichocarpa] )	GO:0009535(cellular_component:chloroplast thylakoid membrane); GO:0006355(biological_process:regulation of transcription, DNA-templated); GO:0016021(cellular_component:integral component of membrane); GO:0003712(molecular_function:transcription cofactor activity); GO:0016592(cellular_component:mediator complex)				ENOG411199Y(S:Function unknown)	ENOG411199Y(-)		sp|Q9SYX1|LIL31_ARATH(Light-harvesting complex-like protein 3 isotype 1, chloroplastic OS=Arabidopsis thaliana OX=3702 GN=LIL3.1 PE=1 SV=1)
MSTRG.26004			816	1	0	0	113.57	1	0	1.46	194.62	0	0	1	170.89	0	0	0	0	0	2.74	316.56	0	0	2	316.86	0	0	0	226.58	0.6667	0	159.693	0.82	0	0	0	286.667	1.58	XP_006374588.1(light-harvesting complex-like protein 3 isotype 1, chloroplastic [Populus trichocarpa] )	GO:0009535(cellular_component:chloroplast thylakoid membrane); GO:0006355(biological_process:regulation of transcription, DNA-templated); GO:0016021(cellular_component:integral component of membrane); GO:0003712(molecular_function:transcription cofactor activity); GO:0016592(cellular_component:mediator complex)				ENOG411199Y(S:Function unknown)	ENOG411199Y(-)		sp|Q9SYX1|LIL31_ARATH(Light-harvesting complex-like protein 3 isotype 1, chloroplastic OS=Arabidopsis thaliana OX=3702 GN=LIL3.1 PE=1 SV=1)
MSTRG.26009			639	3	4	5	6	2	2	4	9	5	4	2	4	1	9	4	8	0	4	5	7	2	2	2	14	4	3	5	3.3333	3.3333	6.3333	3.6667	4.6667	9.6667	2	4	3	PNS22548.1(hypothetical protein POPTR_T136000, partial [Populus trichocarpa])
MSTRG.26025			231	0	0	0	0	1.11	0	0	0	0	0	0	0	0	0	0	0	0	0	0	0	0	0	0	0	0	0	0	0.37	0	0	0	0	0	0	0	0	RQP00876.1(hypothetical protein POPTR_015G107900 [Populus trichocarpa])	GO:0016021(cellular_component:integral component of membrane)				ENOG41104GM(S:Function unknown)	ENOG41104GM(Protein of unknown function, DUF594)	PF13968.6(DUF4220:Domain of unknown function (DUF4220))
MSTRG.26043			713	147.63	124.16	200.53	126.89	114.39	116.53	326.3	133.11	122.77	137.16	266.84	154.94	151.75	149	124.02	178.25	210.21	348.12	134.33	107.23	150.79	346.26	143.5	189.89	131.87	248.19	113.03	128.263	125.95	138.313	264.557	141.59	158.457	164.29	130.287	314.19	XP_024441928.1(uncharacterized protein LOC7457631 [Populus trichocarpa])	GO:0005737(cellular_component:cytoplasm); GO:0031624(molecular_function:ubiquitin conjugating enzyme binding); GO:0032436(biological_process:positive regulation of proteasomal ubiquitin-dependent protein catabolic process); GO:0004842(molecular_function:ubiquitin-protein transferase activity); GO:0000151(cellular_component:ubiquitin ligase complex); GO:0004523(molecular_function:RNA-DNA hybrid ri…				ENOG4111RK3(S:Function unknown); ENOG410YFG7(S:Function unknown)	ENOG4111RK3(IBR domain); ENOG410YFG7(IBR domain)	PF13456.6(RVT_3:Reverse transcriptase-like)
MSTRG.26056			305	1	1	0	0	0	0	0	0	1	1	0	1	2	2	0	0	0	1	1	0	1	0	1	2	4	1	0	0.6667	0.6667	0.3333	0	1.3333	0.6667	1.6667	0.6667	0.6667
MSTRG.26060			225	0	0	0	0	1	0	0	0	0	0	0	0	0	0	1	0	1	0	0	0	3	0	0	0	4	0	0	0.3333	0	0	0	0.3333	0	2.6667	0	0
MSTRG.26072			3129	97	74	8	15	66	35	19	9	70	50	17	12	136	145	147	130	116	30	21	82	62	37	8	123	138	23	12	77.6667	53	12	14.6667	142.667	111.667	105.333	13.6667	30	PNT01760.1(hypothetical protein POPTR_015G121300 [Populus trichocarpa] )
MSTRG.26073			364	3	6	0	0	0	0	1	3	0	5	1	0	2	7	3	5	5	2	0	1	1	1	0	7	3	0	0	1	3.6667	1	0.6667	4	4.3333	3	0	1
MSTRG.26074			274	0	0	0	0	2	0	1	0	0	2	0	0	0	1	2	0	0	0	1	2	0	0	0	1	0	0	1	0.6667	0.6667	0	0.3333	1	1	0	0.6667	0
MSTRG.26078			317	15	11	37	1	5	2	25	6	2	1	5	4	3	1	1	4	5	5	2	9	1	6	3	13	1	3	0	7.3333	4.6667	3.6667	22.3333	1.6667	8.6667	2.3333	1.6667	4.6667	PNT01772.1(hypothetical protein POPTR_015G121900 [Populus trichocarpa])	GO:0016021(cellular_component:integral component of membrane); GO:0030247(molecular_function:polysaccharide binding); GO:0005524(molecular_function:ATP binding); GO:0004672(molecular_function:protein kinase activity)	K04733	IRAK4		COG0515(T:Signal transduction mechanisms)	COG0515(Serine Threonine protein kinase)	PF13947.6(GUB_WAK_bind:Wall-associated receptor kinase galacturonan-binding)
MSTRG.26101			204	9	8	3	2	6	19	5	3	7	15	8	2	17	20	25	9	30	7	0	14	13	4	1	4	20	6	3	7.3333	14	2.3333	5.3333	20.6667	9	21	1.3333	5.6667
MSTRG.26180			252	0	1	4	0	1	0	2	0	2	0	4	0	0	0	0	0	0	1	0	0	0	0	0	0	0	1	0	1	0.3333	0	3.3333	0	0	0	0	0.6667	XP_011030034.1(PREDICTED: traB domain-containing protein isoform X1 [Populus euphratica])					COG1916(S:Function unknown)	COG1916(traB family)
MSTRG.26251			680	3	3	0	1	5	3	3	1	1	7	2	1	4	1	9	8	12	0	0	5	3	0	0	4	12	2	0	3	4.3333	1	1.6667	4.6667	5.6667	9	0	0.6667
MSTRG.2627			220	0	0	0	0	0	0	0	0	0	0	0	1	0	0	0	0	0	0	3	0	0	0	2	0	0	0	0	0	0	0.3333	0	0	0	0	1.6667	0
MSTRG.26277			222	0	0	0	6	3	2	0	2	0	1	1	0	0	1	0	0	1	1	2	0	0	0	3	0	1	3	3	1	1	2.6667	0.3333	0.3333	0	0.6667	2.6667	1.3333
MSTRG.26280			3018	102.47	53.95	81.66	16.05	33.97	60.46	72.1	9.48	33.64	68.52	45.81	9.34	102.6	84.98	116.22	48.33	150.27	45.53	18.83	38.25	90.26	83.86	12.42	39.87	77.4	56.25	11.69	56.6933	60.9767	11.6233	66.5233	101.267	42.15	105.977	14.3133	61.88	RVX02815.1(Retrovirus-related Pol polyprotein from transposon TNT 1-94 [Vitis vinifera])	GO:0000943(cellular_component:retrotransposon nucleocapsid); GO:0015074(biological_process:DNA integration); GO:0008270(molecular_function:zinc ion binding); GO:0003676(molecular_function:nucleic acid binding)	K03006	RPB1, POLR2A	map00240(Pyrimidine metabolism); map03020(RNA polymerase); map00230(Purine metabolism)	ENOG410XS4D(S:Function unknown); COG2801(L:Replication, recombination and repair)	ENOG410XS4D(Retrotransposon protein); COG2801(Retrotransposon protein)	PF07727.14(RVT_2:Reverse transcriptase (RNA-dependent DNA polymerase)); PF00665.26(rve:Integrase core domain); PF13976.6(gag_pre-integrs:GAG-pre-integrase domain)	sp|P10978|POLX_TOBAC(Retrovirus-related Pol polyprotein from transposon TNT 1-94 OS=Nicotiana tabacum OX=4097 PE=2 SV=1)
MSTRG.26358			283	0	0	0	0	0	0	0	0	0	0	0	0	0	0	0	0	0	0	0	0	0	0	0	0	0	0	0	0	0	0	0	0	0	0	0	0
MSTRG.26418			2065	46	10	23	25	27	14	37	34	32	12	45	17	14	32	17	29	23	43	20	23	18	28.01	24	37	14	39	31	35	12	25.3333	35	21	29.6667	18.3333	25	36.67	ALN97018.1(pentatricopeptide repeat superfamily protein [Populus tomentosa] )					ENOG410Z7Z7(S:Function unknown)	ENOG410Z7Z7(Pentatricopeptide repeat-containing protein)	PF13041.6(PPR_2:PPR repeat family); PF01535.20(PPR:PPR repeat); PF12854.7(PPR_1:PPR repeat); PF13812.6(PPR_3:Pentatricopeptide repeat domain)	sp|P0C043|PP318_ARATH(Putative pentatricopeptide repeat-containing protein At4g17915 OS=Arabidopsis thaliana OX=3702 GN=At4g17915 PE=3 SV=1)
MSTRG.26425			3802	377	322	277	294	330	390	335	242	386.56	413	261	300	340	343	416	333	323	275	349	247	298	303	328	383	377	276	257	364.52	375	278.667	291	366.333	321	332.667	311.333	284.667	XP_024442974.1(uncharacterized protein LOC112324464 [Populus trichocarpa] )	GO:0046983(molecular_function:protein dimerization activity); GO:0003677(molecular_function:DNA binding)				ENOG410XWK2(S:Function unknown)	ENOG410XWK2(transposon protein)	PF04937.15(DUF659:Protein of unknown function (DUF 659)); PF02892.15(zf-BED:BED zinc finger); PF05699.14(Dimer_Tnp_hAT:hAT family C-terminal dimerisation region); PF16278.5(zf-C2HE:C2HE / C2H2 / C2HC zinc-binding finger)
MSTRG.26455			358	50.87	101.66	21.46	86.23	26.55	99.89	36.98	84.01	43.48	119.79	66.42	106.16	104.19	91.55	106.59	77.84	128.22	65.73	110.81	52.4	160.69	69.51	110.28	58.34	131.18	54.28	94.55	40.3	107.113	92.1333	41.62	100.777	62.86	140.03	105.213	63.1733	PNS97423.1(hypothetical protein POPTR_016G022200 [Populus trichocarpa])	GO:0016758(molecular_function:transferase activity, transferring hexosyl groups); GO:0008194(molecular_function:UDP-glycosyltransferase activity); GO:0043231(cellular_component:intracellular membrane-bounded organelle)	K21374	UGT85A	map00902(Monoterpenoid biosynthesis)	COG1819(S:Function unknown)	COG1819(Transferase)		sp|Q9SK82|U85A1_ARATH(UDP-glycosyltransferase 85A1 OS=Arabidopsis thaliana OX=3702 GN=UGT85A1 PE=2 SV=1)
MSTRG.26456			471	2	0	3	0	1	1	1	2	2	3	1	2	2	0	1	2	3	4	0	0	6	1	1	3	1	1	0	1.6667	1.3333	1.3333	1.6667	1	1.6667	3.3333	0.3333	2
MSTRG.26484			673	809.4	735.83	325.23	63	485.11	657.67	277.16	100.84	726.62	617.92	314.89	87.78	486.95	538.91	437.42	938.6	566.78	427.66	107.29	738.85	475.89	361.53	103.15	742.56	609.67	366.02	81.28	673.71	670.473	83.8733	305.76	487.76	806.67	550.78	97.24	385.07	XP_002322584.2(alpha-L-arabinofuranosidase 1 [Populus trichocarpa] )	GO:0046556(molecular_function:alpha-L-arabinofuranosidase activity); GO:0046373(biological_process:L-arabinose metabolic process); GO:0009505(cellular_component:plant-type cell wall)	K01209;K19034	abfA;PSRP5	map00520(Amino sugar and nucleotide sugar metabolism)	COG3534(G:Carbohydrate transport and metabolism)	COG3534(Alpha-N-arabinofuranosidase (EC 3.2.1.55))		sp|Q9SG80|ASD1_ARATH(Alpha-L-arabinofuranosidase 1 OS=Arabidopsis thaliana OX=3702 GN=ASD1 PE=1 SV=1)
MSTRG.26486			272	64	57	69	20	36	26	47	22	27	34	41	13	15	10	42	37	38	21	10	30	15	35	12	42	25	25	13	42.3333	39	18.3333	52.3333	22.3333	36.3333	26	11.6667	27	RQP01223.1(hypothetical protein POPTR_016G026050 [Populus trichocarpa])		K14494	DELLA	map04075(Plant hormone signal transduction)	ENOG410ZUXE(K:Transcription)	ENOG410ZUXE(ZnF_BED)	PF03514.14(GRAS:GRAS domain family)	sp|Q6EI05|GAIPB_CUCMA(DELLA protein GAIP-B OS=Cucurbita maxima OX=3661 GN=GAIPB PE=2 SV=1)
MSTRG.26488			446	86	42	78	31	37	36	56	11	57	39	50	18	21	32	35	36	32	49	24	28	20	32	18	54	27	39	11	60	39	20	61.3333	29.3333	39.3333	26.3333	17.6667	40	RQP01221.1(hypothetical protein POPTR_016G026000 [Populus trichocarpa])		K14494	DELLA	map04075(Plant hormone signal transduction)	ENOG410YBFY(G:Carbohydrate transport and metabolism)	ENOG410YBFY(Alpha-N-arabinofuranosidase (EC 3.2.1.55))	PF03514.14(GRAS:GRAS domain family)	sp|Q6EI06|GAIP_CUCMA(DELLA protein GAIP OS=Cucurbita maxima OX=3661 GN=GAIP PE=2 SV=1)
MSTRG.26521			310	1	1.23	1.47	0	2.59	0	1.15	1.07	1.33	0	0	3.97	2	0	2.89	2.32	0	1.09	5.01	0	1.41	0	0	0	0	5.66	0	1.64	0.41	1.68	0.8733	1.63	0.7733	0.47	1.67	2.25	XP_011028724.1(PREDICTED: glutathione S-transferase T3-like, partial [Populus euphratica])					ENOG410YTD5(S:Function unknown)	ENOG410YTD5(-)	PF14303.6(NAM-associated:No apical meristem-associated C-terminal domain)
MSTRG.26532			308	0	0	0	0	0	0	0	1.28	0	0	0	0	0	0	0	0	0.99	0	0	0	0	0	0	0	0	1.11	0	0	0	0.4267	0	0	0	0.33	0	0.37	XP_024447739.1(uncharacterized protein LOC112325449 [Populus trichocarpa])
MSTRG.26533			201	0	0.81	0	13.7	0	0	0.13	9.34	0	0	0	0.67	0	0	0	0	0	0	0.33	0	0	0	3.38	0	0	0	9.95	0	0.27	7.9033	0.0433	0	0	0	4.5533	0	XP_022847510.1(uncharacterized protein LOC111370031 [Olea europaea var. sylvestris])	GO:0000943(cellular_component:retrotransposon nucleocapsid); GO:0016021(cellular_component:integral component of membrane); GO:0015074(biological_process:DNA integration); GO:0008270(molecular_function:zinc ion binding); GO:0003676(molecular_function:nucleic acid binding); GO:0016866(molecular_function:intramolecular transferase activity)				COG2801(L:Replication, recombination and repair); ENOG410XS4D(S:Function unknown)	COG2801(Retrotransposon protein); ENOG410XS4D(Retrotransposon protein)	PF13976.6(gag_pre-integrs:GAG-pre-integrase domain)
MSTRG.26534			201	0	0	0.85	12.16	0.76	0	0	11.72	1.85	1.9	0	10.91	0	0	0	0.83	0.71	0	6.04	0	0	0.81	13.21	0	0	0	2.57	0.87	0.6333	11.5967	0.2833	0	0.2767	0.2367	7.2733	0.27	XP_024456985.1(receptor-like protein 1 [Populus trichocarpa])
MSTRG.26541			449	0	1	24	5	1	0	28	8	0	0	6	15	0	0	1	0	0	6	7	0	0	7	13	3	0	4	10	0.3333	0.3333	9.3333	19.3333	0.3333	1	0	10	5.6667
MSTRG.26578			297	0	0	7	1	0.9	0	0	2	2	0	4	0	1	0	2	2	2	5	0	2.78	0.57	7.7	1	1	0	3	1	0.9667	0	1	3.6667	1	1.9267	0.8567	0.6667	5.2333
MSTRG.26588			290	0	0	2	0	0	0	1	0	3	0	0	1	0	0	0	1	1	0	1	0	0	1	0	1	0	0	0	1	0	0.3333	1	0	0.6667	0.3333	0.3333	0.3333	XP_002308906.1(probable methyltransferase PMT6 [Populus trichocarpa] )	GO:0008168(molecular_function:methyltransferase activity); GO:0016021(cellular_component:integral component of membrane); GO:0005802(cellular_component:trans-Golgi network); GO:0005768(cellular_component:endosome); GO:0005794(cellular_component:Golgi apparatus)				ENOG410YC2G(S:Function unknown)	ENOG410YC2G(methyltransferase)	PF03141.16(Methyltransf_29:Putative S-adenosyl-L-methionine-dependent methyltransferase)	sp|Q9LZA4|PMT7_ARATH(Probable methyltransferase PMT7 OS=Arabidopsis thaliana OX=3702 GN=At5g04060 PE=2 SV=1)
MSTRG.26668			200	0	0	0	0	0	0	0	0	0	0	0	0	0	1	1	0	0	0	2	0	0	0	0	0	0	0	0	0	0	0	0	0.6667	0	0	0.6667	0
MSTRG.26674			256	2	0	0	0	0	0	0	1	0	5	0	0	0	0	0	0	0	0	1	1	0	1	1	2	1	0	1	0.6667	1.6667	0.3333	0	0	1	0.3333	1	0.3333
MSTRG.2669			226	2	0	0	1	0	3	1	0	0	0	0	0	1	0	1	0	0	0	0	0	0	0	1	0	1	0	0	0.6667	1	0.3333	0.3333	0.6667	0	0.3333	0.3333	0	RVW45210.1(Retrovirus-related Pol polyprotein from transposon TNT 1-94 [Vitis vinifera])	GO:0000943(cellular_component:retrotransposon nucleocapsid); GO:0015074(biological_process:DNA integration); GO:0003676(molecular_function:nucleic acid binding)
MSTRG.26697			390	12	31	363	21	11	11	171	20	6	33	118	15	7	8	2	5	7	35	17	9	5	40	9	14	6	22	18	9.6667	25	18.6667	217.333	5.6667	9.3333	6	14.6667	32.3333
MSTRG.26715			408	3	2	0	8	0	1	0	3	1	2	2	3	1	0	0	0	1	0	3	0	1	0	6	0	0	0	0	1.3333	1.6667	4.6667	0.6667	0.3333	0	0.6667	3	0	PNS98036.2(hypothetical protein POPTR_016G056100 [Populus trichocarpa])	GO:0016021(cellular_component:integral component of membrane)
MSTRG.26793			386	14	7	43	16	16	9	46	17	17	10	62	29	9	12	7	4	8	134	53	14	13	83	23	27	12	97	30	15.6667	8.6667	20.6667	50.3333	9.3333	15	11	35.3333	104.667
MSTRG.26833			636	0	0	0	5	0	0	1	5	1	0	2	10	0	0	3	1	0	0	16	0	0	0	17	0	0	0	6	0.3333	0	6.6667	1	1	0.3333	0	13	0
MSTRG.2687			242	115	125	27	19	67	157	20	26	89	130	35	23	130	134	97	97	147	36	27	85	115	24	13	100	122	19	19	90.3333	137.333	22.6667	27.3333	120.333	94	128	19.6667	26.3333	OMO99518.1(hypothetical protein CCACVL1_03761 [Corchorus capsularis] )	GO:0020037(molecular_function:heme binding); GO:0016021(cellular_component:integral component of membrane); GO:0017004(biological_process:cytochrome complex assembly); GO:0045156(molecular_function:electron transporter, transferring electrons within the cyclic electron transport pathway of photosynthesis activity); GO:0009772(biological_process:photosynthetic electron transport in photosystem II)…
MSTRG.26871			1176	5	5	8	8	9	12	8	13	18	13	5	8	15	17	14	13	14	6	8	15	11	8	10	15	27	11	9	10.6667	10	9.6667	7	15.3333	14.3333	17.3333	9	8.3333	BAT72826.1(hypothetical protein VIGAN_01026800 [Vigna angularis var. angularis])	GO:0016021(cellular_component:integral component of membrane)				ENOG4111DEP(S:Function unknown); ENOG41113K7(S:Function unknown)	ENOG4111DEP(-); ENOG41113K7(-)
MSTRG.26881			236	0.64	2	4.87	0.45	1	8.84	6.8	7.69	1.89	6.91	1.84	0	2	1.43	0	6.96	4.61	3.01	1	1.8	1.81	2.81	6.95	5	1.61	1	4	1.1767	5.9167	2.7133	4.5033	1.1433	4.5867	2.6767	3.9833	2.2733	PNS98439.1(hypothetical protein POPTR_016G077100 [Populus trichocarpa])	GO:0016787(molecular_function:hydrolase activity)				COG0596(S:Function unknown)	COG0596(Alpha beta hydrolase)	PF12697.7(Abhydrolase_6:Alpha/beta hydrolase family)
MSTRG.26940			1256	28.42	8.38	23.37	23.77	17.37	24.56	27.51	23.74	15.38	23	20.05	24.02	19.71	16.18	25.77	30.05	20.86	33.82	26.71	32.43	24.91	33.15	28.16	38.44	36.43	28.17	29.33	20.39	18.6467	23.8433	23.6433	20.5533	33.64	27.4	28.0667	31.7133
MSTRG.26995			292	17	8	7.01	21.99	14	28	8	19	19	9	7	20	12.97	23	12	11	16	12	18	15	14	10	16	10	14	9	14	16.6667	15	20.33	7.3367	15.99	12	14.6667	16	10.3333
MSTRG.27000			234	0	0	0	0	2.73	5	4	1	0	0	1	3	3.2	4	2	1	0	0	0	3	1	2	1.47	0.88	0	2	0	0.91	1.6667	1.3333	1.6667	3.0667	1.6267	0.3333	0.49	1.3333	CAC95126.1(gag-pol polyprotein [Populus deltoides])	GO:0000943(cellular_component:retrotransposon nucleocapsid); GO:0015074(biological_process:DNA integration); GO:0008270(molecular_function:zinc ion binding); GO:0003676(molecular_function:nucleic acid binding)				ENOG41116H2(S:Function unknown)	ENOG41116H2(-)	PF14244.6(Retrotran_gag_3:gag-polypeptide of LTR copia-type); PF13961.6(DUF4219:Domain of unknown function (DUF4219))
MSTRG.27009			391	3	3	4	4	1	4	3.03	5	2	2	6	1	7	9.24	1	2	4	5.01	2	6.01	5	6.09	1	7	5	8	1	2	3	3.3333	4.3433	5.7467	5.0033	4.6667	1.3333	6.3667	XP_024447864.1(zinc finger BED domain-containing protein RICESLEEPER 2 [Populus trichocarpa])					ENOG410ZT99(S:Function unknown); ENOG4111T8J(S:Function unknown)	ENOG410ZT99(Pfam:hATC); ENOG4111T8J(transposon protein)	PF05699.14(Dimer_Tnp_hAT:hAT family C-terminal dimerisation region)	sp|P08770|TRA1_MAIZE(Putative AC transposase OS=Zea mays OX=4577 PE=2 SV=2)
MSTRG.27010			1206	161.84	67.37	155.48	128.84	131.26	124.42	142.92	127.54	128.76	119.11	167.18	118.3	143.89	232.07	207.13	153.51	148.7	188.3	163.02	140.63	184.48	167.67	179.03	238.72	186.88	161.42	106.51	140.62	103.633	124.893	155.193	194.363	177.62	173.353	149.52	172.463	XP_024447864.1(zinc finger BED domain-containing protein RICESLEEPER 2 [Populus trichocarpa])					ENOG410ZT99(S:Function unknown); ENOG4111T8J(S:Function unknown)	ENOG410ZT99(Pfam:hATC); ENOG4111T8J(transposon protein)	PF14372.6(DUF4413:Domain of unknown function (DUF4413))	sp|Q6AVI0|RSLE2_ORYSJ(Zinc finger BED domain-containing protein RICESLEEPER 2 OS=Oryza sativa subsp. japonica OX=39947 GN=Os03g0733400 PE=2 SV=1)
MSTRG.27013			215	0	0	0	0	0	1	0	1	0	1	2	1	1	1	2	0	0	4	1	1	1	2	4	2	5	1	0	0	0.6667	0.6667	0.6667	1.3333	1	2	1.6667	2.3333	XP_024465362.1(uncharacterized protein LOC112328803, partial [Populus trichocarpa])
MSTRG.27016			202	72.1	72.98	11.02	2.01	33.03	63.26	0	7.98	60.29	52.02	11	7	94.35	104.15	112.97	41.79	64.17	10.01	4	36.11	66.85	8.98	6.03	33.02	94.17	17	6	55.14	62.7533	5.6633	7.34	103.823	36.9733	75.0633	5.3433	11.9967	TKS00107.1(hypothetical protein D5086_0000186410 [Populus alba])	GO:0016021(cellular_component:integral component of membrane)	K04733	IRAK4
MSTRG.27102			223	0	0	0	0	0	3	0	0	0	0	0	0	0	0	0	1	0	0	0	1	0	0	0	0	0	0	0	0	1	0	0	0	0.6667	0	0	0
MSTRG.27121			259	7.84	3.95	14.51	5.99	6.56	3.95	1.18	1.61	2.81	1.28	6.92	0	2.92	8.24	1.05	8.99	2	8.34	1	6.15	2	12.36	1.94	1	0	6.9	1	5.7367	3.06	2.5333	7.5367	4.07	5.38	1.3333	1.3133	9.2	PNS99029.1(hypothetical protein POPTR_016G111500 [Populus trichocarpa] )	GO:0008017(molecular_function:microtubule binding); GO:0005874(cellular_component:microtubule)				ENOG410YDH8(S:Function unknown)	ENOG410YDH8(UPF0503 protein At3g09070)
MSTRG.27126			331	11	3	5	15	2	2	24	12	4	4	14	9	7	5	3	2	9	26	15	18	5	31	17	6	6	36	15	5.6667	3	12	14.3333	5	8.6667	6.6667	15.6667	31
MSTRG.27141			888	7	12	11	1	7	7	4	4	4	3	10	5	8	13	11	11	16	5	4	10	9	6	0	9	14	5	2	6	7.3333	3.3333	8.3333	10.6667	10	13	2	5.3333	PNS99075.1(hypothetical protein POPTR_016G113900 [Populus trichocarpa])
MSTRG.27147			383	4	9	11	4	4	4	5	21	3	4	5	6	5	9	12	4	3	11	9	17	6	11	13	9	6	5	7	3.6667	5.6667	10.3333	7	8.6667	10	5	9.6667	9
MSTRG.27184			325	0	2.87	0	1.4	0	0	2.54	0	0	0	0	0	0	0	0	1.54	0	0	0	0	1.51	0	0	0	1.35	0	0	0	0.9567	0.4667	0.8467	0	0.5133	0.9533	0	0	PNS99173.1(hypothetical protein POPTR_016G118600, partial [Populus trichocarpa])	GO:0016787(molecular_function:hydrolase activity); GO:0033617(biological_process:mitochondrial respiratory chain complex IV assembly); GO:0006878(biological_process:cellular copper ion homeostasis); GO:0016021(cellular_component:integral component of membrane); GO:0005623(cellular_component:cell); GO:0008535(biological_process:respiratory chain complex IV assembly); GO:0005743(cellular_component:…	K07152	SCO1_2		COG1999(S:Function unknown)	COG1999(Electron transport protein SCO1 SenC)	PF02630.14(SCO1-SenC:SCO1/SenC)	sp|Q8VYP0|SCO11_ARATH(Protein SCO1 homolog 1, mitochondrial OS=Arabidopsis thaliana OX=3702 GN=HCC1 PE=2 SV=1)
MSTRG.2719			989	14	11	19	9	14	12	10	17	18	11	12	14	27	23	15	20	19	10	20	10	17	30	14	20	20	17	7	15.3333	11.3333	13.3333	13.6667	21.6667	16.6667	18.6667	13.6667	19	XP_011045805.1(PREDICTED: pentatricopeptide repeat-containing protein At3g26782, mitochondrial [Populus euphratica] )	GO:0008270(molecular_function:zinc ion binding); GO:0005739(cellular_component:mitochondrion); GO:0009451(biological_process:RNA modification)				ENOG410Z7Z7(S:Function unknown)	ENOG410Z7Z7(histone H3-K4 methylation)		sp|Q9LW32|PP258_ARATH(Pentatricopeptide repeat-containing protein At3g26782, mitochondrial OS=Arabidopsis thaliana OX=3702 GN=PCMP-H34 PE=2 SV=1)
MSTRG.27231			297	3	0	1	0	1	2	0	0	3	0	2	0	5	1	3	3	2	1	0	8	0	1	0	3	0	1	1	2.3333	0.6667	0	1	3	4.6667	0.6667	0.3333	1	PNS99271.1(hypothetical protein POPTR_016G124500 [Populus trichocarpa])	GO:0016758(molecular_function:transferase activity, transferring hexosyl groups); GO:0047213(molecular_function:anthocyanidin 3-O-glucosyltransferase activity)	K21374	UGT85A	map00902(Monoterpenoid biosynthesis)	COG1819(S:Function unknown)	COG1819(-)		sp|F8WLS6|UGT6_CATRO(7-deoxyloganetin glucosyltransferase OS=Catharanthus roseus OX=4058 GN=UGT85A23 PE=1 SV=1)
MSTRG.27237			426	0	0	0	0	0	1	0	0	0	0	0	0	2	3	1	0	0	0	0	0	1	0	0	0	0	0	0	0	0.3333	0	0	2	0	0.3333	0	0	PNS99284.1(hypothetical protein POPTR_016G125100 [Populus trichocarpa])	GO:0003735(molecular_function:structural constituent of ribosome); GO:0019843(molecular_function:rRNA binding); GO:0022627(cellular_component:cytosolic small ribosomal subunit); GO:0006412(biological_process:translation); GO:0005840(cellular_component:ribosome)	K02987	RP-S4e, RPS4	map03010(Ribosome)	COG1471(I:Lipid transport and metabolism)	COG1471(Cationic peroxidase)		sp|O81363|RS4_PRUAR(40S ribosomal protein S4 OS=Prunus armeniaca OX=36596 GN=RPS4 PE=2 SV=1)
MSTRG.27266			247	1	2	2	0	2	1	4	3	1	5	2	1	6	2	0	5	3	0	0	0	1	0	2	0	1	2	2	1.3333	2.6667	1.3333	2.6667	2.6667	1.6667	1.6667	1.3333	0.6667						COG0657(I:Lipid transport and metabolism)	COG0657(alpha beta hydrolase fold-3 domain protein)
MSTRG.27275			268	2	0	0	0	0	1	3	0	0	2	2	0	4	6	3	1	1	1	0	0	14	1	0	0	5	4	0	0.6667	1	0	1.6667	4.3333	0.3333	6.6667	0	2
MSTRG.27279			337	1	2	0	8.13	0	1	2	10.98	6	1	1	25.02	1.18	8	9	2	0	1	3.64	6.62	3	2	15.74	5	7	3	7	2.3333	1.3333	14.71	1	6.06	4.54	3.3333	8.7933	2	AAD13304.1(polyprotein [Solanum lycopersicum])	GO:0015074(biological_process:DNA integration); GO:0005634(cellular_component:nucleus); GO:0004190(molecular_function:aspartic-type endopeptidase activity); GO:0003676(molecular_function:nucleic acid binding)	K09660	MPDU1		COG2801(L:Replication, recombination and repair)	COG2801(Retrotransposon protein)
MSTRG.27280			248	1	0	0	1	0	0	0	1	1	0	1	4	0	1	1	0	0	4	2	0	0	0	3	0	0	2	0	0.6667	0	2	0.3333	0.6667	0	0	1.6667	2	XP_028109544.1(LOW QUALITY PROTEIN: uncharacterized protein LOC114308202 [Camellia sinensis])	GO:0015074(biological_process:DNA integration); GO:0005634(cellular_component:nucleus); GO:0004190(molecular_function:aspartic-type endopeptidase activity); GO:0003676(molecular_function:nucleic acid binding)				COG2801(L:Replication, recombination and repair)	COG2801(Retrotransposon protein)	PF00078.27(RVT_1:Reverse transcriptase (RNA-dependent DNA polymerase))	sp|P31843|RRPO_OENBE(RNA-directed DNA polymerase homolog OS=Oenothera berteroana OX=3950 PE=4 SV=1)
MSTRG.27287			586	106.33	115.31	56.98	95.74	83.43	123.34	72.47	50.83	63.95	102.32	38.23	45.59	154.99	186.39	211.03	31.45	81.47	42.44	41.73	57.27	118.92	77.99	64.04	34.32	106.29	35.79	35.09	84.57	113.657	64.0533	55.8933	184.137	41.0133	102.227	46.9533	52.0733	PNS23878.1(hypothetical protein POPTR_T031200 [Populus trichocarpa])	GO:0016021(cellular_component:integral component of membrane)
MSTRG.27291			752	43	47	1	0	31	68	0	2	14	51	1	1	90	36	64	35	110	0	2	18	62	0	4	22	85	0	2	29.3333	55.3333	1	0.6667	63.3333	25	85.6667	2.6667	0
MSTRG.27293			349	5	6	27	130	4	10	75	103	2	4	24	106	2	4	1	7	0	16	78	3	21	53	155	8	2	17	101	3.6667	6.6667	113	42	2.3333	6	7.6667	111.333	28.6667	PNS99380.1(hypothetical protein POPTR_016G132100 [Populus trichocarpa])
MSTRG.27354			288	18	1	0	0	12	2	0	0	12	9	0	0	0	3	3	0	0	0	0	1	1	0	0	5	1	0	0	14	4	0	0	2	2	0.6667	0	0	RQP01691.1(hypothetical protein POPTR_016G139451 [Populus trichocarpa])
MSTRG.27355			465	4	0	1	0	7	0	1	0	1	0	0	0	1	0	1	1	1	0	0	5	0	0	0	0	0	1	0	4	0	0	0.6667	0.6667	2	0.3333	0	0.3333
MSTRG.27356			248	0	0	0	0	0	0	0	0	0	0	0	0	0.09	0.71	0.44	0	0	0	0	0	0.51	0	0	0	2.49	0	0	0	0	0	0	0.4133	0	1	0	0
MSTRG.27357			1199	16.22	17	1	0	11	22	0	0	3	29	0	0	70.91	22.29	57.56	28	61	2	0	28	64.15	2	0	52	77.51	6	0	10.0733	22.6667	0	0.3333	50.2533	36	67.5533	0	3.3333	RVW48419.1(Retrovirus-related Pol polyprotein from transposon TNT 1-94 [Vitis vinifera])	GO:0000943(cellular_component:retrotransposon nucleocapsid); GO:0015074(biological_process:DNA integration); GO:0008270(molecular_function:zinc ion binding); GO:0003676(molecular_function:nucleic acid binding); GO:0009507(cellular_component:chloroplast)	K03006;K03549	RPB1, POLR2A;kup	map00240(Pyrimidine metabolism); map03020(RNA polymerase); map00230(Purine metabolism)			PF07727.14(RVT_2:Reverse transcriptase (RNA-dependent DNA polymerase)); PF13961.6(DUF4219:Domain of unknown function (DUF4219))	sp|Q94HW2|POLR1_ARATH(Retrovirus-related Pol polyprotein from transposon RE1 OS=Arabidopsis thaliana OX=3702 GN=RE1 PE=2 SV=1)
MSTRG.27373			633	84	56	114	44	48	25	68	38	44	41	103	17	14	40	22	50	39	76	18	46	48	56	18	79	17	81	11	58.6667	40.6667	33	95	25.3333	58.3333	34.6667	15.6667	71
MSTRG.27377			427	1	1	1	0	1	2	1	2	2	0	1	1	1	3	1	0	1	2	2	0	2	2	0	2	2	1	0	1.3333	1	1	1	1.6667	0.6667	1.6667	0.6667	1.6667	PNS99550.1(hypothetical protein POPTR_016G141500 [Populus trichocarpa])
MSTRG.27378			842	10	4	4	2	4	6	6	3	4	7	7	0	2	4	3	6	7	14	2	2	2	6	2	6	9	5	4	6	5.6667	1.6667	5.6667	3	4.6667	6	2.6667	8.3333
MSTRG.27381			589	24.26	7	12	7.18	23	8.37	13.49	18.43	27	6	16.44	9	23	36.62	18.54	23	25	26	16	13.55	15.98	25	15.33	37	26	18	16	24.7533	7.1233	11.5367	13.9767	26.0533	24.5167	22.3267	15.7767	23	PNT20023.1(hypothetical protein POPTR_009G068500 [Populus trichocarpa])	GO:0000213(molecular_function:tRNA-intron endonuclease activity); GO:0000214(cellular_component:tRNA-intron endonuclease complex); GO:0000379(biological_process:tRNA-type intron splice site recognition and cleavage); GO:0003676(molecular_function:nucleic acid binding); GO:0006388(biological_process:tRNA splicing, via endonucleolytic cleavage and ligation)	K15322	TSEN2		COG1676(J:Translation, ribosomal structure and biogenesis)	COG1676(sites to release the intron. The products are an intron and two tRNA half-molecules bearing 2',3' cyclic phosphate and 5'-OH termini. Recognizes a pseudosymmetric substrate in which 2 bulged loops of 3 bases are separated by a stem of 4 bp (By similarity))		sp|Q9M1E8|SEN21_ARATH(tRNA-splicing endonuclease subunit Sen2-1 OS=Arabidopsis thaliana OX=3702 GN=SEN1 PE=2 SV=1)
MSTRG.27440			644	22.98	68.23	30.21	37	18.49	87.35	9.98	21.25	22	98.99	21.15	51.3	47.35	44.98	42.16	29.48	103.46	29.83	24.97	13	156.4	46.34	49.35	22.97	118.43	16	31.36	21.1567	84.8567	36.5167	20.4467	44.83	21.8167	126.097	35.2267	30.7233	TKS14258.1(stachyose synthase-like [Populus alba])	GO:0010325(biological_process:raffinose family oligosaccharide biosynthetic process)	K06611	E2.4.1.67	map00052(Galactose metabolism)	ENOG410YCZ1(S:Function unknown)	ENOG410YCZ1(Stachyose)	PF05691.12(Raffinose_syn:Raffinose synthase or seed imbibition protein Sip1)	sp|Q93XK2|STSYN_PEA(Stachyose synthase OS=Pisum sativum OX=3888 GN=STS1 PE=1 SV=1)
MSTRG.27474			357	1.06	0	0	0.79	1	1.93	3	0.93	1.9	0	3	1.54	3	0	0	1	0	1	1	1	2	1.99	1.52	5	1.85	3.96	3	1.32	0.6433	1.0867	2	1	2.3333	1.2833	1.84	2.3167	XP_011042275.1(PREDICTED: pentatricopeptide repeat-containing protein At1g02370, mitochondrial [Populus euphratica])					ENOG410Z7Z7(S:Function unknown)	ENOG410Z7Z7(O-acyltransferase (WSD1-like))	PF01535.20(PPR:PPR repeat); PF13041.6(PPR_2:PPR repeat family); PF12854.7(PPR_1:PPR repeat)	sp|Q9FZ24|PPR4_ARATH(Pentatricopeptide repeat-containing protein At1g02370, mitochondrial OS=Arabidopsis thaliana OX=3702 GN=At1g02370 PE=2 SV=1)
MSTRG.27505			320	4.45	1	3	0	2	1	8.58	7.44	2	2.02	1	1.02	0	0	2	1.98	1	4.92	3	2.05	3.02	3.99	1	1.89	1.75	5.45	0.1	2.8167	1.34	2.82	4.1933	0.6667	1.9733	1.9233	1.3667	4.7867	XP_011029084.1(PREDICTED: putative disease resistance RPP13-like protein 1 [Populus euphratica])	GO:0043531(molecular_function:ADP binding)				COG4886(S:Function unknown); COG0724(S:Function unknown)	COG4886(leucine Rich Repeat); COG0724(Rna-binding protein)	PF00931.22(NB-ARC:NB-ARC domain)	sp|Q9LRR4|R13L1_ARATH(Putative disease resistance RPP13-like protein 1 OS=Arabidopsis thaliana OX=3702 GN=RPPL1 PE=3 SV=1)
MSTRG.27537			388	5	3	3	7	1	5	3	9	6	10	5	2	7	3	1	1	4	6	3	10	8	9	5	6	10	7	7	4	6	6	3.6667	3.6667	5.6667	7.3333	5	7.3333	PNS94833.1(hypothetical protein POPTR_017G021100 [Populus trichocarpa])
MSTRG.27539			349	1	1	4	2	6	9	1	1	2	5	3	4	6	5	2	1	1	5	6	5	9	3	0	3	4	4	0	3	5	2.3333	2.6667	4.3333	3	4.6667	2	4	PNS94846.1(hypothetical protein POPTR_017G022200, partial [Populus trichocarpa])
MSTRG.27550			506	12	2	14	17	15	12	11	9	16	16	14	8	7	8	10	29	15	13	13	15	10	7	15	10	19	8	5	14.3333	10	11.3333	13	8.3333	18	14.6667	11	9.3333	KDP43895.1(hypothetical protein JCGZ_20905 [Jatropha curcas])					COG4043(S:Function unknown)	COG4043(ProFAR isomerase)
MSTRG.27589			344	0	0	0	5	0	1	0	2	0	0	1	7	0	0	0	0	0	0	5	0	0	1	1	1	0	0	3	0	0.3333	4.6667	0.3333	0	0.3333	0	3	0.3333	TKS17844.1(mitogen-activated protein kinase kinase kinase 1-like [Populus alba])	GO:0004674(molecular_function:protein serine/threonine kinase activity); GO:0004842(molecular_function:ubiquitin-protein transferase activity); GO:0005524(molecular_function:ATP binding); GO:0004672(molecular_function:protein kinase activity)	K13414	MEKK1	map04016(MAPK signaling pathway - plant); map04626(Plant-pathogen interaction)	ENOG410XQGS(S:Function unknown)	ENOG410XQGS(far-red impaired responsive)	PF00069.25(Pkinase:Protein kinase domain); PF07714.17(Pkinase_Tyr:Protein tyrosine kinase); PF14531.6(Kinase-like:Kinase-like)	sp|A9RVK2|M3K1B_PHYPA(Mitogen-activated protein kinase kinase kinase 1b OS=Physcomitrella patens subsp. patens OX=3218 GN=MEKK1b PE=2 SV=2)
MSTRG.276			427	12	6.18	1	9	17	9.4	5	1	6	7	3.36	12	12	13.11	10	9	16	9	7	10	13	6	3.67	7	15	6	11	11.6667	7.5267	7.3333	3.12	11.7033	8.6667	14.6667	7.2233	7	RVX09487.1(Retrovirus-related Pol polyprotein from transposon TNT 1-94 [Vitis vinifera])	GO:0000943(cellular_component:retrotransposon nucleocapsid); GO:0015074(biological_process:DNA integration); GO:0008270(molecular_function:zinc ion binding); GO:0003676(molecular_function:nucleic acid binding)				COG2801(D:Cell cycle control, cell division, chromosome partitioning); COG2801(U:Intracellular trafficking, secretion, and vesicular transport); ENOG410XS4D(S:Function unknown); ENOG410Y4C5(S:Function unknown); ENOG410ZPTD(S:Function unknown); ENOG4110A82(S:Function unknown)	COG2801(minichromosome maintenance complex component 3 associated protein); COG2801(minichromosome maintenance complex component 3 associated protein); ENOG410XS4D(Retrotransposon protein); ENOG410Y4C5(Retrotransposon protein); ENOG410ZPTD(Zinc knuckle); ENOG4110A82(-)	PF00665.26(rve:Integrase core domain); PF13683.6(rve_3:Integrase core domain)	sp|P10978|POLX_TOBAC(Retrovirus-related Pol polyprotein from transposon TNT 1-94 OS=Nicotiana tabacum OX=4097 PE=2 SV=1)
MSTRG.27604			327	0	1.88	0	0	1.09	0.58	3.81	0	0	0	0	4.85	0.62	1.7	0	2.79	3.79	2.07	0	0	0	2.06	0	3.61	0.03	3.17	0.84	0.3633	0.82	1.6167	1.27	0.7733	2.1333	1.2733	0.28	2.4333	PNS94989.2(hypothetical protein POPTR_017G031500 [Populus trichocarpa])					ENOG410Y14I(S:Function unknown); COG0464(S:Function unknown)	ENOG410Y14I(-); COG0464(-)		sp|F4IAE9|Y1591_ARATH(ATPase family AAA domain-containing protein At1g05910 OS=Arabidopsis thaliana OX=3702 GN=At1g05910 PE=2 SV=1)
MSTRG.27605			428	1.59	5.5	1.27	5.57	7.02	7.47	6.9	2.17	0	1.1	0.78	9.61	6.11	11.67	4.43	5.83	6.96	9.42	7.28	14.97	0	4.87	2.99	12.17	2	0.25	2.09	2.87	4.69	5.7833	2.9833	7.4033	10.99	2.9867	4.12	4.8467	PNS94990.2(hypothetical protein POPTR_017G031500 [Populus trichocarpa])	GO:0031936(biological_process:negative regulation of chromatin silencing); GO:0042393(molecular_function:histone binding); GO:0005634(cellular_component:nucleus); GO:0045944(biological_process:positive regulation of transcription from RNA polymerase II promoter); GO:0016887(molecular_function:ATPase activity); GO:0003682(molecular_function:chromatin binding); GO:0005524(molecular_function:ATP bin…				COG0464(O:Posttranslational modification, protein turnover, chaperones); ENOG410Y14I(S:Function unknown)	COG0464(Aaa atpase); ENOG410Y14I(-)	PF00439.25(Bromodomain:Bromodomain)	sp|F4IAE9|Y1591_ARATH(ATPase family AAA domain-containing protein At1g05910 OS=Arabidopsis thaliana OX=3702 GN=At1g05910 PE=2 SV=1)
MSTRG.27624			288	0	0	0	0	0	0	0	1	0	4	2	1	0	0	0	0	0	0	1	2	0	1	1	0	0	0	0	0	1.3333	0.6667	0.6667	0	0.6667	0	0.6667	0.3333	PNS95052.2(hypothetical protein POPTR_017G035400 [Populus trichocarpa])	GO:0016021(cellular_component:integral component of membrane); GO:0030247(molecular_function:polysaccharide binding); GO:0005524(molecular_function:ATP binding); GO:0004672(molecular_function:protein kinase activity)	K04733	IRAK4		COG0515(T:Signal transduction mechanisms)	COG0515(Serine Threonine protein kinase)	PF13947.6(GUB_WAK_bind:Wall-associated receptor kinase galacturonan-binding)
MSTRG.2763			745	17	6	5	17	12	1	3	14	5	3	1	13	5	9	2	9	12	3	1	9	4	5	7	6	8	5	6	11.3333	3.3333	14.6667	3	5.3333	8	8	4.6667	4.3333	PNT58391.1(hypothetical protein POPTR_001G351100 [Populus trichocarpa])	GO:0008168(molecular_function:methyltransferase activity); GO:0005739(cellular_component:mitochondrion)	K18164	NDUFAF7	map04714(Thermogenesis)	COG1565(S:Function unknown)	COG1565(NADH dehydrogenase ubiquinone complex I, assembly factor 7)		sp|Q9VGR2|NDUF7_DROME(Protein arginine methyltransferase NDUFAF7 homolog, mitochondrial OS=Drosophila melanogaster OX=7227 GN=CG17726 PE=2 SV=1)
MSTRG.27644			1278	6	4	16	53	11	7	8	33	9	2	15	33	2	10	4	23	4	19	27	11	3	11	27	17	3	17	20	8.6667	4.3333	39.6667	13	5.3333	17	3.3333	24.6667	15.6667	PNS95102.1(hypothetical protein POPTR_017G038200 [Populus trichocarpa])	GO:0016021(cellular_component:integral component of membrane)
MSTRG.27695			360	14.44	7.81	15.89	13	9.99	9.72	14.18	11.6	20.34	12.64	16.59	16.05	5.9	5	2.95	12.85	13.9	22.68	11.22	9.43	8.01	18.21	14.14	25.37	8.03	15.41	12.78	14.9233	10.0567	13.55	15.5533	4.6167	15.8833	9.98	12.7133	18.7667	PNS95257.1(hypothetical protein POPTR_017G046300 [Populus trichocarpa])	GO:0016021(cellular_component:integral component of membrane); GO:0004190(molecular_function:aspartic-type endopeptidase activity)				ENOG410XNV7(O:Posttranslational modification, protein turnover, chaperones)	ENOG410XNV7(aspartic)
MSTRG.27724			2202	880.13	383.09	762.59	735.2	625.22	598.5	896.18	441.78	723.72	565.32	792.91	445.98	653.06	866.36	794	682.27	808.18	922.4	621.71	589.32	693.92	921.75	642.86	1264.69	825.08	787.94	401.03	743.023	515.637	540.987	817.227	771.14	845.427	775.727	555.2	877.363	TKR78864.1(hypothetical protein D5086_0000277640 [Populus alba])	GO:0004674(molecular_function:protein serine/threonine kinase activity); GO:0005524(molecular_function:ATP binding); GO:0004672(molecular_function:protein kinase activity)	K13429	CERK1	map04626(Plant-pathogen interaction)	COG0515(H:Coenzyme transport and metabolism)	COG0515(Catalyzes the conversion of D-ribulose 5-phosphate to formate and 3,4-dihydroxy-2-butanone 4-phosphate (By similarity))	PF00069.25(Pkinase:Protein kinase domain)	sp|Q6UD73|LYK3_MEDTR(LysM domain receptor-like kinase 3 OS=Medicago truncatula OX=3880 GN=LYK3 PE=1 SV=1)
MSTRG.27741			205	0	2	1	0	1	2	0	0	0	0	0	0	1	1	1	0	1	0	0	0	1	0	0	3	2	0	0	0.3333	1.3333	0	0.3333	1	1	1.3333	0	0	ABG37667.2(transposase tnp2, partial [Populus trichocarpa])
MSTRG.27769			221	0	0	0	1	0	0	2.68	0	0	0	1.22	0	0.38	0.26	1.17	0	0	0	0	0.55	0	3.99	2.49	0	0	0	0	0	0	0.3333	1.3	0.6033	0.1833	0	0.83	1.33	XP_024453248.1(uncharacterized protein LOC112326930 [Populus trichocarpa])	GO:0015074(biological_process:DNA integration); GO:0005634(cellular_component:nucleus); GO:0003676(molecular_function:nucleic acid binding)
MSTRG.27786			394	1	3	1	0	0	0	0	0	1	1	0	0	10	1	6	2	3	0	1	2	2	2	0	3	6	0	0	0.6667	1.3333	0	0.3333	5.6667	2.3333	3.6667	0.3333	0.6667	TKS12942.1(glycine-rich RNA-binding protein 2, mitochondrial-like [Populus alba])
MSTRG.27799			706	11	5	9	3	5	6	9	1	2	4	12	9	2	6	1	8	4	8	3	8	5	8	4	7	9	10	4	6	5	4.3333	10	3	7.6667	6	3.6667	8.6667	XP_011045805.1(PREDICTED: pentatricopeptide repeat-containing protein At3g26782, mitochondrial [Populus euphratica] )	GO:0008270(molecular_function:zinc ion binding); GO:0005739(cellular_component:mitochondrion); GO:0009451(biological_process:RNA modification)				ENOG410Z7Z7(S:Function unknown)	ENOG410Z7Z7(Pentatricopeptide repeat-containing protein)	PF01535.20(PPR:PPR repeat); PF13041.6(PPR_2:PPR repeat family); PF12854.7(PPR_1:PPR repeat)	sp|Q9LW32|PP258_ARATH(Pentatricopeptide repeat-containing protein At3g26782, mitochondrial OS=Arabidopsis thaliana OX=3702 GN=PCMP-H34 PE=2 SV=1)
MSTRG.27805			278	0	0	0	0	0	2	0	0	1	2	0	0	0	0	1	0	0	0	0	1	0	0	0	0	0	0	0	0.3333	1.3333	0	0	0.3333	0.3333	0	0	0
MSTRG.27813			491	2	0	1	5.84	1.5	2.34	6.59	3.31	2	2	3	3.15	3	8.63	7.58	6	2	1.12	5.35	1	2	2	12.59	6.23	5.54	1	4.36	1.8333	1.4467	4.1	3.53	6.4033	4.41	3.18	7.4333	1.3733	XP_024444028.1(uncharacterized protein LOC112324611 [Populus trichocarpa])					ENOG4111SPB(S:Function unknown); ENOG4111XVU(S:Function unknown)	ENOG4111SPB(transposon protein); ENOG4111XVU(-)
MSTRG.27821			677	6	5	5	12	1	4	7	6	6	4	6	3	13	15	5	9	9	9	10	4	10	15.99	15	5	8	6	8	4.3333	4.3333	7	6	11	6	9	11	10.33	XP_027342220.1(probable beta-1,4-xylosyltransferase IRX10L [Abrus precatorius])	GO:0016762(molecular_function:xyloglucan:xyloglucosyl transferase activity); GO:0006486(biological_process:protein glycosylation); GO:0005618(cellular_component:cell wall); GO:0016021(cellular_component:integral component of membrane); GO:0048046(cellular_component:apoplast); GO:0006073(biological_process:cellular glucan metabolic process); GO:0004553(molecular_function:hydrolase activity, hydrol…	K20870	IRX10		ENOG410XTFH(S:Function unknown)	ENOG410XTFH(CRAL TRIO domain protein)	PF03016.15(Exostosin:Exostosin family)	sp|Q940Q8|IX10L_ARATH(Probable beta-1,4-xylosyltransferase IRX10L OS=Arabidopsis thaliana OX=3702 GN=IRX10L PE=2 SV=1)
MSTRG.27841			489	23.07	14	12	6	13.99	3.02	7	4	3	3	13	5	2	3	9	11	7	12	6	2	12	4	5	17.16	14	14	4	13.3533	6.6733	5	10.6667	4.6667	10.0533	11	5	10
MSTRG.27842			280	6	0	0	0	0	1	4	1	4	2	0	0	0	0	2	1	0	1	0	0	0	1	1	3	5	1	0	3.3333	1	0.3333	1.3333	0.6667	1.3333	1.6667	0.3333	1
MSTRG.27843			278	1109.91	1253.55	163	60.99	710.17	1173.18	132	126	1472.89	1036.8	235.89	73.01	1564.02	1873.06	1811.33	1049.9	1151.2	187.6	71	558.32	938.88	214.04	136.36	534.36	1294.03	234.46	57	1097.66	1154.51	86.6667	176.963	1749.47	714.193	1128.04	88.12	212.033	ADK60808.1(hypothetical protein, partial [Arachis diogoi])					ENOG410Y2V0(S:Function unknown); ENOG410Z2MS(S:Function unknown)	ENOG410Y2V0(-); ENOG410Z2MS(-)
MSTRG.27847			426	2	0	7	6	1	1	7	8	3	0	2	2	6	8	2	3	4	4	5	5	5	12	1	3	0	4	9	2	0.3333	5.3333	5.3333	5.3333	3.6667	3	5	6.6667	CAN80356.1(hypothetical protein VITISV_003506 [Vitis vinifera])	GO:0010581(biological_process:regulation of starch biosynthetic process); GO:0015074(biological_process:DNA integration); GO:0008270(molecular_function:zinc ion binding); GO:0003676(molecular_function:nucleic acid binding); GO:0019252(biological_process:starch biosynthetic process); GO:0009507(cellular_component:chloroplast)				COG2801(L:Replication, recombination and repair)	COG2801(Retrotransposon protein)	PF00078.27(RVT_1:Reverse transcriptase (RNA-dependent DNA polymerase))	sp|P10401|POLY_DROME(Retrovirus-related Pol polyprotein from transposon gypsy OS=Drosophila melanogaster OX=7227 GN=pol PE=4 SV=1)
MSTRG.27849			289	0	0	1	0	1	2.04	2	0	2	0	0	0	0	0	1	0	1	1	1	0	1	0	0	0	0	0	0	1	0.68	0	1	0.3333	0	0.6667	0.3333	0.3333	ABG37658.1(integrase [Populus trichocarpa])	GO:0016779(molecular_function:nucleotidyltransferase activity); GO:0006355(biological_process:regulation of transcription, DNA-templated); GO:0004523(molecular_function:RNA-DNA hybrid ribonuclease activity); GO:0015074(biological_process:DNA integration); GO:0003676(molecular_function:nucleic acid binding); GO:0003964(molecular_function:RNA-directed DNA polymerase activity)						PF17919.1(RT_RNaseH_2:RNase H-like domain found in reverse transcriptase); PF17917.1(RT_RNaseH:RNase H-like domain found in reverse transcriptase)	sp|P10394|POL4_DROME(Retrovirus-related Pol polyprotein from transposon 412 OS=Drosophila melanogaster OX=7227 GN=POL PE=4 SV=1)
MSTRG.2785			214	0	0	0	2	0	0	1	1	0	0	0	1	0	1	1	3	1	2	3	1	2	3	2	0	2	0	0	0	0	1.3333	0.3333	0.6667	1.3333	1.6667	1.6667	1.6667	PNT58438.1(hypothetical protein POPTR_001G353300 [Populus trichocarpa])
MSTRG.27850			313	14.19	1.24	1.14	10.78	4.34	7.73	3.18	1.15	5.65	0	2	1.52	10.18	13.6	14.31	4.44	1.28	2.46	1.08	6.82	3.91	2.79	2.72	1.24	10.98	0	2.6	8.06	2.99	4.4833	2.1067	12.6967	4.1667	5.39	2.1333	1.75	PNT43355.1(hypothetical protein POPTR_003G029800 [Populus trichocarpa])	GO:0016021(cellular_component:integral component of membrane)
MSTRG.27852			347	0	1.78	0	0	0	0.99	0	0	0	1.02	0	1.12	0	0	3.05	0	5.2	0	0	0	2.03	0	0	0	2.03	0	0	0	1.2633	0.3733	0	1.0167	0	3.0867	0	0	RVW91774.1(Transposon Ty3-I Gag-Pol polyprotein [Vitis vinifera])	GO:0003964(molecular_function:RNA-directed DNA polymerase activity); GO:0015074(biological_process:DNA integration); GO:0003676(molecular_function:nucleic acid binding)						PF17921.1(Integrase_H2C2:Integrase zinc binding domain); PF09337.10(zf-H2C2:H2C2 zinc finger)
MSTRG.27857			320	1	1	1	6	4	2	2	2	1	1	0	2	18	6	7	3	0	2	4	0	4	3	2	1	2	1	1	2	1.3333	3.3333	1	10.3333	1.3333	2	2.3333	2	PNT34674.1(hypothetical protein POPTR_005G031000 [Populus trichocarpa])
MSTRG.27869			573	2	0	8	5	6	0	9	4	2	0	5	7	5	1	1	4	2	5	5	5	1	11	4	7	0	7	5	3.3333	0	5.3333	7.3333	2.3333	5.3333	1	4.6667	7.6667	TKR85399.1(hypothetical protein D5086_0000248170 [Populus alba])	GO:0042765(cellular_component:GPI-anchor transamidase complex); GO:0016255(biological_process:attachment of GPI anchor to protein)	K05292	PIGT	map00563(Glycosylphosphatidylinositol (GPI)-anchor biosynthesis)	ENOG410XRR0(S:Function unknown)	ENOG410XRR0(GPI transamidase component)	PF04113.14(Gpi16:Gpi16 subunit, GPI transamidase component)
MSTRG.27918			221	1.88	1.87	0	0.38	0	0	0	0	3.76	0	0	1.05	1.23	0	0.67	5.61	1.66	0	2.27	0	1	0	2	0	2.37	0.93	0	1.88	0.6233	0.4767	0	0.6333	1.87	1.6767	1.4233	0.31	PNS95760.1(hypothetical protein POPTR_017G076900 [Populus trichocarpa])	GO:0022857(molecular_function:transmembrane transporter activity); GO:0016021(cellular_component:integral component of membrane); GO:0005886(cellular_component:plasma membrane)	K14638	SLC15A3_4, PHT		COG3104(E:Amino acid transport and metabolism)	COG3104(transporter)	PF00854.21(PTR2:POT family)	sp|Q944G5|PTR44_ARATH(Protein NRT1/ PTR FAMILY 2.10 OS=Arabidopsis thaliana OX=3702 GN=NPF2.10 PE=1 SV=3)
MSTRG.2792			261	2	1	4	9	2	4	1	6	1	3	6	7	4	7	4	5	9	1	3	6	1	0	3	7	4	2	7	1.6667	2.6667	7.3333	3.6667	5	6	4.6667	4.3333	1	XP_024446832.1(uncharacterized protein LOC112325205 [Populus trichocarpa] )	GO:0015074(biological_process:DNA integration); GO:0008270(molecular_function:zinc ion binding); GO:0003676(molecular_function:nucleic acid binding)
MSTRG.27941			265	0	0	0	5	0	0	0	0	0	0	0	3	0	0	0	0	0	0	1	0	0	0	0	0	0	0	0	0	0	2.6667	0	0	0	0	0.3333	0	PNS95825.1(hypothetical protein POPTR_017G080400 [Populus trichocarpa])	GO:0000439(cellular_component:core TFIIH complex); GO:0006351(biological_process:transcription, DNA-templated); GO:0006289(biological_process:nucleotide-excision repair)	K03141	TFIIH1, GTF2H1, TFB1	map03022(Basal transcription factors); map03420(Nucleotide excision repair)	ENOG410XRI6(K:Transcription)	ENOG410XRI6(Transcription factor)
MSTRG.27942			249	9.02	24.17	10	18.65	13.43	22.83	20.38	6.71	12.46	23.03	17.42	11.6	17.21	24.11	26.62	24.88	39.93	30.68	15.54	19.11	40.41	17.69	15.1	25.49	20	23.77	9.53	11.6367	23.3433	12.32	15.9333	22.6467	23.16	33.4467	13.39	24.0467
MSTRG.27957			288	0	2	0	1	0	0	0	0	0	0	1	1	3	0	0	0	0	0	2	0	0	5	1	3	2	0	2	0	0.6667	0.6667	0.3333	1	1	0.6667	1.6667	1.6667	PNS95861.1(hypothetical protein POPTR_017G082800 [Populus trichocarpa])
MSTRG.2798			348	14	6	11	5	2	4	29	12	11	4	21	7	5	6	2	3	7	26	8	9	11	28	12	18	3	19	15	9	4.6667	8	20.3333	4.3333	10	7	11.6667	24.3333
MSTRG.28046			266	0	0	0	0	0	0	0	0	0	1	2	0	1	0	0	0	0	0	0	0	3	1	0	0	3	0	0	0	0.3333	0	0.6667	0.3333	0	2	0	0.3333
MSTRG.2805			683	5	5	0	4	2	8	3	7	2	15	1	0	10	4	11	9	8	1	1	7	12	2	0	9	4	0	4	3	9.3333	3.6667	1.3333	8.3333	8.3333	8	1.6667	1
MSTRG.28228			399	42.12	35.02	58.27	73.24	35.04	37.68	51.89	72.48	58.31	40.45	47.23	68.21	15.74	21.67	27.06	62.19	41.54	74.75	45.77	45.03	37.99	94.21	60.59	65.75	30.61	56.84	51.53	45.1567	37.7167	71.31	52.4633	21.49	57.6567	36.7133	52.63	75.2667	PNS96495.1(hypothetical protein POPTR_017G120200 [Populus trichocarpa])	GO:0003735(molecular_function:structural constituent of ribosome); GO:0019843(molecular_function:rRNA binding); GO:0005840(cellular_component:ribosome); GO:0003723(molecular_function:RNA binding); GO:0006412(biological_process:translation)	K02987	RP-S4e, RPS4	map03010(Ribosome)	COG1471(S:Function unknown)	COG1471(WD repeatcontaining protein)	PF08071.12(RS4NT:RS4NT (NUC023) domain); PF01479.25(S4:S4 domain)	sp|P46299|RS4_GOSHI(40S ribosomal protein S4 OS=Gossypium hirsutum OX=3635 GN=RPS4 PE=2 SV=1)
MSTRG.28256			475	13.74	6.14	2	12.92	10.99	16.31	9.99	14.67	15.24	9.01	5	7.02	22.9	33.88	33.38	22.71	45.24	17.08	13.65	12.01	16.09	7.06	10.04	15.19	26.32	10.34	7	13.3233	10.4867	11.5367	5.6633	30.0533	16.6367	29.2167	10.23	11.4933	PNS96559.1(hypothetical protein POPTR_017G123600, partial [Populus trichocarpa])
MSTRG.28257			384	0	1	0	0	1.14	1.24	1.27	0	0	0	0	0	0	4.12	0	1.25	1.29	0	0	1.41	1.26	0	0	3.79	0	0	0	0.38	0.7467	0	0.4233	1.3733	2.15	0.85	0	0	PNS96559.1(hypothetical protein POPTR_017G123600, partial [Populus trichocarpa])					COG2124(Q:Secondary metabolites biosynthesis, transport and catabolism)	COG2124(Cytochrome p450)
MSTRG.28280			601	28.93	11.74	13.84	5.89	10	5	27.61	10	13.99	8.86	7	8.83	7.84	12.81	14.78	10.02	10.64	9.72	7	9.28	11.67	11.81	6.31	12.77	8.88	7.9	8	17.64	8.5333	8.24	16.15	11.81	10.69	10.3967	7.1033	9.81	XP_024445132.1(putative disease resistance protein RGA4 [Populus trichocarpa] )	GO:0043531(molecular_function:ADP binding)	K15078	SLX1		COG4886(S:Function unknown)	COG4886(leucine Rich Repeat)	PF18052.1(Rx_N:Rx N-terminal domain); PF00931.22(NB-ARC:NB-ARC domain); PF13191.6(AAA_16:AAA ATPase domain)	sp|Q7XA39|RGA4_SOLBU(Putative disease resistance protein RGA4 OS=Solanum bulbocastanum OX=147425 GN=RGA4 PE=2 SV=1)
MSTRG.28291			225	0	0	0	0	1	5	0	0	0	4	0	0	2	1	1	0	2	0	0	1	3	0	0	0	0	1	0	0.3333	3	0	0	1.3333	0.3333	1.6667	0	0.3333
MSTRG.28314			776	6	8	10	1	5	4	8	1	4	2	2	0	2	8	9	5	6	6	1	6	5	4	5	13	2	6	1	5	4.6667	0.6667	6.6667	6.3333	8	4.3333	2.3333	5.3333	RQP02300.1(hypothetical protein POPTR_017G130900 [Populus trichocarpa])	GO:0043531(molecular_function:ADP binding)				COG4886(S:Function unknown)	COG4886(ADP-ribosylation factor-like)	PF18052.1(Rx_N:Rx N-terminal domain); PF00931.22(NB-ARC:NB-ARC domain); PF05659.11(RPW8:Arabidopsis broad-spectrum mildew resistance protein RPW8)	sp|Q7XA39|RGA4_SOLBU(Putative disease resistance protein RGA4 OS=Solanum bulbocastanum OX=147425 GN=RGA4 PE=2 SV=1)
MSTRG.28315			1166	14	10	17	4	14	20	15	7	9	5	12	4	9	13	5	12	12	14	4	17	10	7	4	24	8	20	7	12.3333	11.6667	5	14.6667	9	17.6667	10	5	13.6667	RQP02296.1(hypothetical protein POPTR_017G130900 [Populus trichocarpa] )	GO:0043531(molecular_function:ADP binding)				COG4886(S:Function unknown)	COG4886(leucine Rich Repeat)	PF13855.6(LRR_8:Leucine rich repeat); PF12799.7(LRR_4:Leucine Rich repeats (2 copies))
MSTRG.28318			994	84.27	55.59	109.21	59.97	44.35	47.07	101.79	41.13	69.67	65.14	86.38	37.18	24.07	32.22	22.77	75.56	40.17	32.36	41.99	30.37	28.95	27.97	39.7	43.31	35.98	37.24	84.4	66.0967	55.9333	46.0933	99.1267	26.3533	49.7467	35.0333	55.3633	32.5233	PNS96691.1(hypothetical protein POPTR_017G131200, partial [Populus trichocarpa])	GO:0043531(molecular_function:ADP binding)	K15078	SLX1		COG4886(S:Function unknown)	COG4886(leucine Rich Repeat)		sp|Q7XA39|RGA4_SOLBU(Putative disease resistance protein RGA4 OS=Solanum bulbocastanum OX=147425 GN=RGA4 PE=2 SV=1)
MSTRG.28319			994	0	0	0	1.08	3.71	0	0	0	0	0	0	0	0	0	0	0	0	0	0	0	0	0	0	0	0	0	0	1.2367	0	0.36	0	0	0	0	0	0	PNS96691.1(hypothetical protein POPTR_017G131200, partial [Populus trichocarpa])	GO:0043531(molecular_function:ADP binding)	K15078	SLX1		COG4886(S:Function unknown)	COG4886(leucine Rich Repeat)		sp|Q7XA39|RGA4_SOLBU(Putative disease resistance protein RGA4 OS=Solanum bulbocastanum OX=147425 GN=RGA4 PE=2 SV=1)
MSTRG.28334			742	5	1	2	9	6	1	7	5	6	2	3	12	8	9	3	15	4	1	5	2	4	7	3	21	5	1	11	5.6667	1.3333	8.6667	4	6.6667	12.6667	4.3333	6.3333	3
MSTRG.28391			744	8	11	23	13	10	10	21	9	14	14	16	27	17	10	15	11	19	14	6	4	22	13	7	7	11	16	14	10.6667	11.6667	16.3333	20	14	7.3333	17.3333	9	14.3333	PHT27974.1(hypothetical protein CQW23_32393 [Capsicum baccatum])	GO:0016021(cellular_component:integral component of membrane)	K10706	SETX, ALS4		COG1112(L:Replication, recombination and repair)	COG1112(Retrotransposon protein)
MSTRG.28394			540	24.42	32.57	15.49	15.67	32.63	42.54	18.09	17.36	19.99	35.13	17.26	12.16	32.16	31.17	33.06	22.27	48.84	12.05	16.46	15.17	33.02	14.52	20.03	20.81	35.63	11.53	11.64	25.68	36.7467	15.0633	16.9467	32.13	19.4167	39.1633	16.0433	12.7	XP_011005534.1(PREDICTED: LOW QUALITY PROTEIN: uncharacterized protein LOC105111782 [Populus euphratica])	GO:0000943(cellular_component:retrotransposon nucleocapsid); GO:0016021(cellular_component:integral component of membrane); GO:0015074(biological_process:DNA integration); GO:0008270(molecular_function:zinc ion binding); GO:0003676(molecular_function:nucleic acid binding); GO:0004970(molecular_function:ionotropic glutamate receptor activity)				ENOG4111WQF(S:Function unknown); ENOG410XS4D(S:Function unknown); COG2801(L:Replication, recombination and repair)	ENOG4111WQF(-); ENOG410XS4D(Retrotransposon protein); COG2801(Retrotransposon protein)	PF07727.14(RVT_2:Reverse transcriptase (RNA-dependent DNA polymerase))	sp|P10978|POLX_TOBAC(Retrovirus-related Pol polyprotein from transposon TNT 1-94 OS=Nicotiana tabacum OX=4097 PE=2 SV=1)
MSTRG.28396			204	0	1	1	0	1	0	2	1	1	1	0	0	0	0	0	0	0	0	3	0	3	0	0	0	1	0	0	0.6667	0.6667	0.3333	1	0	0	1.3333	1	0
MSTRG.28397			620	0	4	0	0	0	2	0	0	1	3	1	1	0	2	0	1	2	0	0	1	1	0	3	0	1	0	2	0.3333	3	0.3333	0.3333	0.6667	0.6667	1.3333	1.6667	0
MSTRG.28443			506	2	2	1	2	2	3	7	3	3	6	2	1	5	13	4	6	6.21	7	6	4	4	6	3	11	12	5	2	2.3333	3.6667	2	3.3333	7.3333	7	7.4033	3.6667	6	PNS22864.1(hypothetical protein POPTR_T108600 [Populus trichocarpa])	GO:0043531(molecular_function:ADP binding)				COG4886(S:Function unknown)	COG4886(leucine Rich Repeat)
MSTRG.28444			479	16	9	4	8	11	12	16	4	22	10	8	9	15	19	18	14	17.79	8	13	9	18	13	20	22	21	14	7	16.3333	10.3333	7	9.3333	17.3333	15	18.93	13.3333	11.6667	XP_011038434.1(PREDICTED: putative disease resistance RPP13-like protein 1 [Populus euphratica])	GO:0043531(molecular_function:ADP binding)				COG4886(S:Function unknown)	COG4886(leucine Rich Repeat)		sp|Q7XA40|RGA3_SOLBU(Putative disease resistance protein RGA3 OS=Solanum bulbocastanum OX=147425 GN=RGA3 PE=2 SV=2)
MSTRG.28445			838	23	5	8	3	6	5	15	6.24	10	9	9.58	14	12	15	15	12	16	11	8	21	18	4	4	15	7.15	18	11	13	6.3333	7.7467	10.86	14	16	13.7167	7.6667	11
MSTRG.28448			244	1	0	1	5	1	0	2	0	0	1	1	3	0	3	2	0	0	1	1	1	1	2	1	2	1	0	1	0.6667	0.3333	2.6667	1.3333	1.6667	1	0.6667	1	1	XP_021674727.1(putative disease resistance RPP13-like protein 1 [Hevea brasiliensis])	GO:0004721(molecular_function:phosphoprotein phosphatase activity); GO:0043531(molecular_function:ADP binding)				COG4886(S:Function unknown)	COG4886(leucine Rich Repeat)	PF18052.1(Rx_N:Rx N-terminal domain)
MSTRG.28471			2958	412.26	225.27	359.54	447.13	300	250	367.97	386.38	395.98	321	381.41	399	279.51	309.97	321.9	358.37	350	451.51	547.1	276.39	300.16	299.83	509.6	425.03	326.96	413.86	460.39	369.413	265.423	410.837	369.64	303.793	353.263	325.707	505.697	388.4	XP_006372364.2(zinc finger BED domain-containing protein RICESLEEPER 2 isoform X1 [Populus trichocarpa])					ENOG4111T8J(S:Function unknown); ENOG410ZUXE(K:Transcription)	ENOG4111T8J(transposon protein); ENOG410ZUXE(ZnF_BED)	PF14372.6(DUF4413:Domain of unknown function (DUF4413)); PF05699.14(Dimer_Tnp_hAT:hAT family C-terminal dimerisation region)	sp|Q75HY5|RSLE3_ORYSJ(Zinc finger BED domain-containing protein RICESLEEPER 3 OS=Oryza sativa subsp. japonica OX=39947 GN=Os05g0583200 PE=2 SV=1)
MSTRG.28479			333	1	5	0	0	1	1	1	1	0	0	0	2	1	0	0	0	4	0	2	2	2	4	0	3	0	0	0	0.6667	2	1	0.3333	0.3333	1.6667	2	0.6667	1.3333
MSTRG.28486			268	2	10	0	5	3	5	0	1	2	4	0	7	5	8	17	6	18	0	5	9	9	1	3	4	18	0	5	2.3333	6.3333	4.3333	0	10	6.3333	15	4.3333	0.3333	TKS15477.1(hypothetical protein D5086_0000031720 [Populus alba])	GO:0016021(cellular_component:integral component of membrane)
MSTRG.28495			360	17.36	16.09	6.32	31.35	2.9	20.08	18.27	16.54	23.83	29.07	11.88	34.34	41.71	38.03	42.02	24.47	17.01	12.7	20.47	5.86	28.89	13.69	18.12	27.51	24.31	13.23	15.96	14.6967	21.7467	27.41	12.1567	40.5867	19.28	23.4033	18.1833	13.2067
[truncated: 35,192 more rows]
